# Supplementary material for: Hidden shifts in allometry scaling between sound production and perception in anurans
Source: PeerJ. 2023 Nov 3;11:e16322. doi: 10.7717/peerj.16322 (PMC10629387; doi:10.7717/peerj.16322)
Supplement: Supplemental Information 1 [file peerj-11-16322-s001.xlsx]

## Sheet: Tympanum&SVL
Superfamily	Family	Genus	species	Museum voucher	SVL (mm)	Tibia length (mm)	Tympanum diameter (mm)	Reference for tympanum	Mean dominant frequency (Hz)	Reference for call frequency	Lotic water	Reference for habitat
Brachycephaloidea	Brachycephalidae	Brachycephalus	Brachycephalus actaeus	n/a	10.1	3.4	Tympanum indistinct	Monteiro, J. P. de C., T. H. Condez, P. C. de A. Garcia, E. J. Comitti, I. B. Amaral, and C. F. B. Haddad. 2018. A new species of Brachycephalus (Anura, Brachycephalidae) from the coast of Santa Catarina State, southern Atlantic Forest, Brazil. Zootaxa 4407: 483–505.	6900	Monteiro, J. P. de C., T. H. Condez, P. C. de A. Garcia, E. J. Comitti, I. B. Amaral, and C. F. B. Haddad. 2018. A new species of Brachycephalus (Anura, Brachycephalidae) from the coast of Santa Catarina State, southern Atlantic Forest, Brazil. Zootaxa 4407: 483–505.	No	Monteiro, J. P. de C., T. H. Condez, P. C. de A. Garcia, E. J. Comitti, I. B. Amaral, and C. F. B. Haddad. 2018. A new species of Brachycephalus (Anura, Brachycephalidae) from the coast of Santa Catarina State, southern Atlantic Forest, Brazil. Zootaxa 4407: 483–505.
Brachycephaloidea	Brachycephalidae	Brachycephalus	Brachycephalus albolineatus	MHNCI 10290	9.9	3.3	Tympanum indistinct	Bornschein, M. R., L. F. Ribeiro, D. C. Blackburn, E. L. Stanley, and M. R. Pie. 2016. A new species of Brachycephalus (Anura: Brachycephalidae) from Santa Catarina, southern Brazil. PeerJ 4: e2629.	637	Bornschein, M. R., Ribeiro, L. F., Rollo, M. M. Jr, Confetti, A. E., and Pie, M. R. 2018. Advertisement call of Brachycephalus albolineatus (Anura: Brachycephalidae). PeerJ 6: e5273.	No	Bornschein, M. R., L. F. Ribeiro, D. C. Blackburn, E. L. Stanley, and M. R. Pie. 2016. A new species of Brachycephalus (Anura: Brachycephalidae) from Santa Catarina, southern Brazil. PeerJ 4: e2629.
Brachycephaloidea	Brachycephalidae	Ischnocnema	Ischnocnema abdita	n/a	16	8.8	1	Canedo, Clarissa, and Bruno VS Pimenta. "New species of Ischnocnema (Anura, Brachycephalidae) from the Atlantic rainforest of the state of Espírito Santo, Brazil." South American Journal of Herpetology 5.3 (2010): 199-206.	n/a	n/a	No
Brachycephaloidea	Brachycephalidae	Ischnocnema	Ischnocnema bocaina	n/a	18.6	9.1	1.3	Taucce, Pedro PG, et al. "A new species of Ischnocnema Reinhardt and Lütken, 1862 (Anura: Brachycephalidae) of the I. lactea species series from southeastern Brazil." Zootaxa4706.4 (2019): 531-545.	2576	Taucce, Pedro PG, et al. "A new species of Ischnocnema Reinhardt and Lütken, 1862 (Anura: Brachycephalidae) of the I. lactea species series from southeastern Brazil." Zootaxa4706.4 (2019): 531-545.	No	Taucce, Pedro PG, et al. "A new species of Ischnocnema Reinhardt and Lütken, 1862 (Anura: Brachycephalidae) of the I. lactea species series from southeastern Brazil." Zootaxa4706.4 (2019): 531-545.
Brachycephaloidea	Brachycephalidae	Ischnocnema	Ischnocnema colibri	n/a	23.9	13.86	1.24	Taucce, Pedro PG, et al. "Molecular phylogeny of Ischnocnema (Anura: Brachycephalidae) with the redefinition of its series and the description of two new species." Molecular phylogenetics and evolution 128 (2018): 123-146.	2755	Taucce, Pedro PG, et al. "Molecular phylogeny of Ischnocnema (Anura: Brachycephalidae) with the redefinition of its series and the description of two new species." Molecular phylogenetics and evolution 128 (2018): 123-146.	No	Taucce, Pedro PG, et al. "Molecular phylogeny of Ischnocnema (Anura: Brachycephalidae) with the redefinition of its series and the description of two new species." Molecular phylogenetics and evolution 128 (2018): 123-146.
Brachycephaloidea	Brachycephalidae	Ischnocnema	Ischnocnema concolor	n/a	16.6	7.4	0.6	Targino, Mariane, Paulo Nogueira Costa, and Sergio Putsch de Carvalho E. Silva. "Two new species of the Ischnocnema lactea species series from Itatiaia highlands, southeastern Brazil (Amphibia, Anura, Brachycephalidae)." South American Journal of Herpetology 4.2 (2009): 139-150.	n/a	n/a	n/a	n/a
Brachycephaloidea	Brachycephalidae	Ischnocnema	Ischnocnema feioi	n/a	22.1	16.13	1.11	Taucce, Pedro PG, Clarissa Canedo, and Célio FB Haddad. "Two new species of Ischnocnema (Anura: Brachycephalidae) from southeastern Brazil and their phylogenetic position within the I. guentheri series." Herpetological Monographs 32.1 (2018): 1-21.	2880	Taucce, Pedro PG, Clarissa Canedo, and Célio FB Haddad. "Two new species of Ischnocnema (Anura: Brachycephalidae) from southeastern Brazil and their phylogenetic position within the I. guentheri series." Herpetological Monographs 32.1 (2018): 1-21.	n/a	n/a
Brachycephaloidea	Brachycephalidae	Ischnocnema	Ischnocnema garciai	n/a	16.8	11.59	0.96	Taucce, Pedro PG, Clarissa Canedo, and Célio FB Haddad. "Two new species of Ischnocnema (Anura: Brachycephalidae) from southeastern Brazil and their phylogenetic position within the I. guentheri series." Herpetological Monographs 32.1 (2018): 1-21.	3575	Taucce, Pedro PG, Clarissa Canedo, and Célio FB Haddad. "Two new species of Ischnocnema (Anura: Brachycephalidae) from southeastern Brazil and their phylogenetic position within the I. guentheri series." Herpetological Monographs 32.1 (2018): 1-21.	n/a	n/a
Brachycephaloidea	Brachycephalidae	Ischnocnema	Ischnocnema gualteri	n/a	n/a	n/a	n/a		2400	Heyer, W. Ronald. "Variation, systematics, and zoogeography of Eleutherodactylus guentheri and closely related species (Amphibia: Anura: Leptodactylidae)." Smithsonian Contributions to Zoology (1984).	n/a	n/a
Brachycephaloidea	Brachycephalidae	Ischnocnema	Ischnocnema guentheri	n/a	n/a	n/a	n/a		3045	Gehara, Marcelo, et al. "From widespread to microendemic: molecular and acoustic analyses show that Ischnocnema guentheri (Amphibia: Brachycephalidae) is endemic to Rio de Janeiro, Brazil." Conservation genetics 14.5 (2013): 973-982.	n/a	n/a
Brachycephaloidea	Brachycephalidae	Ischnocnema	Ischnocnema henselii	n/a	n/a	n/a	n/a		2100	Kwet, Axel, and Mirco Solé. "Validation of Hylodes henselii Peters, 1870, from Southern Brazil and description of acoustic variation in Eleutherodactylus guentheri (Anura: Leptodactylidae)." Journal of Herpetology 39.4 (2005): 521-532.	n/a	n/a
Brachycephaloidea	Brachycephalidae	Ischnocnema	Ischnocnema hoehnei	n/a	32.4	22.36	1.67	Taucce, Pedro PG, et al. "Molecular phylogeny of Ischnocnema (Anura: Brachycephalidae) with the redefinition of its series and the description of two new species." Molecular phylogenetics and evolution 128 (2018): 123-146.	1900	Taucce, Pedro PG, et al. "Molecular phylogeny of Ischnocnema (Anura: Brachycephalidae) with the redefinition of its series and the description of two new species." Molecular phylogenetics and evolution 128 (2018): 123-146.	No	Taucce, Pedro PG, et al. "Molecular phylogeny of Ischnocnema (Anura: Brachycephalidae) with the redefinition of its series and the description of two new species." Molecular phylogenetics and evolution 128 (2018): 123-146.
Brachycephaloidea	Brachycephalidae	Ischnocnema	Ischnocnema izecksohni	n/a	n/a	n/a	n/a		2440	Taucce, Pedro PG, et al. "The advertisement call, color patterns and distribution of Ischnocnema izecksohni (Caramaschi and Kisteumacher, 1989)(Anura, Brachycephalidae)." Papéis Avulsos de Zoologia 52.9 (2012): 112-120.	n/a	n/a
Brachycephaloidea	Brachycephalidae	Ischnocnema	Ischnocnema juipoca	n/a	19.5	11.1	1		3300	Giaretta, Ariovaldo Antonio, Daniel Toffoli, and Luciano Elias Oliveira. "A new species of Ischnocnema (Anura: Eleutherodactylinae) from open areas of the Cerrado Biome in southeastern Brazil." Zootaxa 1666.1 (2007): 43-51.	n/a	n/a
Brachycephaloidea	Brachycephalidae	Ischnocnema	Ischnocnema karst	n/a	23.2	12.2	1.2	Canedo, Clarissa, et al. "A new species of Ischnocnema (Anura) from the São Francisco Basin karst region, Brazil." Herpetologica 68.3 (2012): 393-400.	n/a	n/a	n/a	n/a
Brachycephaloidea	Brachycephalidae	Ischnocnema	Ischnocnema lactea	n/a	n/a	n/a	n/a		2498	Taucce, Pedro PG, et al. "A new species of Ischnocnema Reinhardt and Lütken, 1862 (Anura: Brachycephalidae) of the I. lactea species series from southeastern Brazil." Zootaxa4706.4 (2019): 531-545.	n/a	n/a
Brachycephaloidea	Brachycephalidae	Ischnocnema	Ischnocnema manezinho	n/a	n/a	n/a	n/a		2675	Castanho, Luciano Mendes, and Célio FB Haddad. "New species of Eleutherodactylus (Amphibia: Leptodactylidae) from Guaraqueçaba, Atlantic Forest of Brazil." Copeia 2000.3 (2000): 777-781.	n/a	n/a
Brachycephaloidea	Brachycephalidae	Ischnocnema	Ischnocnema melanopygia	n/a	16.9	8.2	0.9	Targino, Mariane, Paulo Nogueira Costa, and Sergio Putsch de Carvalho E. Silva. "Two new species of the Ischnocnema lactea species series from Itatiaia highlands, southeastern Brazil (Amphibia, Anura, Brachycephalidae)." South American Journal of Herpetology 4.2 (2009): 139-150.	n/a	n/a	n/a	n/a
Brachycephaloidea	Brachycephalidae	Ischnocnema	Ischnocnema nasuta	n/a	n/a	n/a	n/a		2350	Heyer, W. Ronald. "Variation, systematics, and zoogeography of Eleutherodactylus guentheri and closely related species (Amphibia: Anura: Leptodactylidae)." Smithsonian Contributions to Zoology (1984).	n/a	n/a
Brachycephaloidea	Brachycephalidae	Ischnocnema	Ischnocnema nigriventris	n/a	n/a	n/a	n/a		1908.1	Taucce, Pedro PG, et al. "A new species of Ischnocnema Reinhardt and Lütken, 1862 (Anura: Brachycephalidae) of the I. lactea species series from southeastern Brazil." Zootaxa4706.4 (2019): 531-545.	n/a	n/a
Brachycephaloidea	Brachycephalidae	Ischnocnema	Ischnocnema oea	n/a	16	11.2	0.89	Taucce, Pedro PG, Clarissa Canedo, and Célio FB Haddad. "Two new species of Ischnocnema (Anura: Brachycephalidae) from southeastern Brazil and their phylogenetic position within the I. guentheri series." Herpetological Monographs 32.1 (2018): 1-21.	3610	Taucce, Pedro PG, Clarissa Canedo, and Célio FB Haddad. "Two new species of Ischnocnema (Anura: Brachycephalidae) from southeastern Brazil and their phylogenetic position within the I. guentheri series." Herpetological Monographs 32.1 (2018): 1-21.	n/a	n/a
Brachycephaloidea	Brachycephalidae	Ischnocnema	Ischnocnema parnaso	n/a	28.8	16.7	1.34	Taucce, Pedro PG, et al. "Molecular phylogeny of Ischnocnema (Anura: Brachycephalidae) with the redefinition of its series and the description of two new species." Molecular phylogenetics and evolution 128 (2018): 123-146.	2505	Taucce, Pedro PG, et al. "Molecular phylogeny of Ischnocnema (Anura: Brachycephalidae) with the redefinition of its series and the description of two new species." Molecular phylogenetics and evolution 128 (2018): 123-146.	No	Taucce, Pedro PG, et al. "Molecular phylogeny of Ischnocnema (Anura: Brachycephalidae) with the redefinition of its series and the description of two new species." Molecular phylogenetics and evolution 128 (2018): 123-146.
Brachycephaloidea	Brachycephalidae	Ischnocnema	Ischnocnema penaxavantinho	n/a	16	8.6	0.8		3800	Giaretta, Ariovaldo Antonio, Daniel Toffoli, and Luciano Elias Oliveira. "A new species of Ischnocnema (Anura: Eleutherodactylinae) from open areas of the Cerrado Biome in southeastern Brazil." Zootaxa 1666.1 (2007): 43-51.	No
Brachycephaloidea	Brachycephalidae	Ischnocnema	Ischnocnema randorum	n/a	n/a	n/a	n/a		4500	Taucce, Pedro PG, et al. "A new species of Ischnocnema Reinhardt and Lütken, 1862 (Anura: Brachycephalidae) of the I. lactea species series from southeastern Brazil." Zootaxa4706.4 (2019): 531-545.	n/a	n/a
Brachycephaloidea	Brachycephalidae	Ischnocnema	Ischnocnema sambaqui	n/a	36.89	19.16	1.92	Castanho, Luciano Mendes, and Célio FB Haddad. "New species of Eleutherodactylus (Amphibia: Leptodactylidae) from Guaraqueçaba, Atlantic Forest of Brazil." Copeia 2000.3 (2000): 777-781.	1925	Castanho, Luciano Mendes, and Célio FB Haddad. "New species of Eleutherodactylus (Amphibia: Leptodactylidae) from Guaraqueçaba, Atlantic Forest of Brazil." Copeia 2000.3 (2000): 777-781.	YES	Castanho, Luciano Mendes, and Célio FB Haddad. "New species of Eleutherodactylus (Amphibia: Leptodactylidae) from Guaraqueçaba, Atlantic Forest of Brazil." Copeia 2000.3 (2000): 777-781.
Brachycephaloidea	Brachycephalidae	Ischnocnema	Ischnocnema venancioi	n/a	23.9	13.15	0.81	Taucce, Pedro PG, et al. "Molecular phylogeny of Ischnocnema (Anura: Brachycephalidae) with the redefinition of its series and the description of two new species." Molecular phylogenetics and evolution 128 (2018): 123-146.	n/a	n/a	No	Taucce, Pedro PG, et al. "Molecular phylogeny of Ischnocnema (Anura: Brachycephalidae) with the redefinition of its series and the description of two new species." Molecular phylogenetics and evolution 128 (2018): 123-146.
Brachycephaloidea	Brachycephalidae	Ischnocnema	Ischnocnema vizottoi	n/a	15.2	6.9	0.9	Martins, Itamar A., and Celio FB Haddad. "A new species of Ischnocnema from highlands of the Atlantic Forest, Southeastern Brazil (Terrarana, Brachycephalidae)." Zootaxa2617.1 (2010): 55-65.	3611	Martins, Itamar A., and Celio FB Haddad. "A new species of Ischnocnema from highlands of the Atlantic Forest, Southeastern Brazil (Terrarana, Brachycephalidae)." Zootaxa2617.1 (2010): 55-65.	No	Martins, Itamar A., and Celio FB Haddad. "A new species of Ischnocnema from highlands of the Atlantic Forest, Southeastern Brazil (Terrarana, Brachycephalidae)." Zootaxa2617.1 (2010): 55-65.
Brachycephaloidea	Craugastoridae	Bahius	Bahius bilineatus	ZUEC-AMP 8657	25.64	12.43	1.42		n/a	n/a	n/a	n/a
Brachycephaloidea	Craugastoridae	Bahius	Bahius bilineatus	ZUEC-AMP 20666	18.63	10.98	1.29		n/a	n/a	n/a	n/a
Brachycephaloidea	Craugastoridae	Bahius	Bahius bilineatus	ZUEC-AMP 21740	18.34	9.3	1.05		n/a	n/a	n/a	n/a
Brachycephaloidea	Craugastoridae	Bahius	Bahius bilineatus	ZUEC-AMP 21741	18.32	9.6	1.22		n/a	n/a	n/a	n/a
Brachycephaloidea	Craugastoridae	Barycholos	Barycholos ternetzi	ZUEC-AMP 13253	30.81	16.63	2.63		3777.7	Martins et al. 2009	n/a	n/a
Brachycephaloidea	Craugastoridae	Barycholos	Barycholos ternetzi	ZUEC-AMP 13264	27.55	15.13	2.18		n/a	n/a	n/a	n/a
Brachycephaloidea	Craugastoridae	Barycholos	Barycholos ternetzi	ZUEC-AMP 13475	27.1	16.22	2.13		n/a	n/a	n/a	n/a
Brachycephaloidea	Craugastoridae	Barycholos	Barycholos ternetzi	ZUEC-AMP 14120	28.94	16.07	2.27		n/a	n/a	n/a	n/a
Brachycephaloidea	Craugastoridae	Bryophryne	Bryophryne abramalagae	n/a	17.4	6.3	Tympanum indistinct		n/a	n/a	No
Brachycephaloidea	Craugastoridae	Bryophryne	Bryophryne bakersfield	n/a	20.3	7.2	Tympanum indistinct	Chaparro, J. C., J. M. Padial, R. C. Gutiérrez, and I. De la Riva. 2015. A new species of Andean frog of the genus Bryophryne from southern Peru (Anura: Craugastoridae) and its phylogenetic position, with notes on the diversity of the genus. Zootaxa 3994: 94–108.	n/a	n/a	No	Chaparro, J. C., J. M. Padial, R. C. Gutiérrez, and I. De la Riva. 2015. A new species of Andean frog of the genus Bryophryne from southern Peru (Anura: Craugastoridae) and its phylogenetic position, with notes on the diversity of the genus. Zootaxa 3994: 94–108.
Brachycephaloidea	Craugastoridae	Ceuthomantis	Ceuthomantis aracamuni	n/a	18.2	11	1	Barrio-Amoros, Cesar L., and Cesar R. Molina. "A new Eleutherodactylus (Anura, Brachycephalidae) from the Venezuelan Guayana, and redescription of Eleutherodactylus vilarsi (Melin)." Zootaxa 1302.1 (2006): 1-20.	n/a	n/a	No	Barrio-Amoros, Cesar L., and Cesar R. Molina. "A new Eleutherodactylus (Anura, Brachycephalidae) from the Venezuelan Guayana, and redescription of Eleutherodactylus vilarsi (Melin)." Zootaxa 1302.1 (2006): 1-20.
Brachycephaloidea	Craugastoridae	Ceuthomantis	Ceuthomantis cavernibardus	n/a	28.8	16.8	1.7	Myers, Charles W., and Maureen A. Donnelly. "A tepui herpetofauna on a granitic mountain (Tamacuari) in the borderland between Venezuela and Brazil: report from the Phipps Tapirapecó Expedition. American Museum novitates; no. 3213." (1997).	1500	Myers, Charles W., and Maureen A. Donnelly. "A tepui herpetofauna on a granitic mountain (Tamacuari) in the borderland between Venezuela and Brazil: report from the Phipps Tapirapecó Expedition. American Museum novitates; no. 3213." (1997).	No	Myers, Charles W., and Maureen A. Donnelly. "A tepui herpetofauna on a granitic mountain (Tamacuari) in the borderland between Venezuela and Brazil: report from the Phipps Tapirapecó Expedition. American Museum novitates; no. 3213." (1997).
Brachycephaloidea	Craugastoridae	Ceuthomantis	Ceuthomantis duellmani	n/a	25	14.2	1	Barrio-Amorós, César Luis. "A New Ceuthomantis (Anura: Terrarana: Ceuthomantidae) from Sarisariñama Tepui, Southern Venezuela." Herpetologica 66.2 (2010): 172-181.	3630	Barrio-Amorós, César Luis. "A New Ceuthomantis (Anura: Terrarana: Ceuthomantidae) from Sarisariñama Tepui, Southern Venezuela." Herpetologica 66.2 (2010): 172-181.	No	Barrio-Amorós, César Luis. "A New Ceuthomantis (Anura: Terrarana: Ceuthomantidae) from Sarisariñama Tepui, Southern Venezuela." Herpetologica 66.2 (2010): 172-181.
Brachycephaloidea	Craugastoridae	Ceuthomantis	Ceuthomantis smaragdinus	n/a	19.8	11.8	1	Heinicke, Matthew P., et al. "A new frog family (Anura: Terrarana) from South America and an expanded direct-developing clade revealed by molecular phylogeny." Zootaxa2211.1 (2009): 1-35.	n/a	n/a	YES	Heinicke, Matthew P., et al. "A new frog family (Anura: Terrarana) from South America and an expanded direct-developing clade revealed by molecular phylogeny." Zootaxa2211.1 (2009): 1-35.
Brachycephaloidea	Craugastoridae	Craugastor	Craugastor aenigmaticus	n/a	16.1	8.5	0.95	Arias, Erick, Gerardo Chaves, and Gabriela Parra-Olea. "A new species of Craugastor (Anura: Craugastoridae) from the montane rainforest of the Cordillera de Talamanca, Costa Rica." Phyllomedusa: Journal of Herpetology 17.2 (2018): 211-232.	n/a	n/a	No	Arias, Erick, Gerardo Chaves, and Gabriela Parra-Olea. "A new species of Craugastor (Anura: Craugastoridae) from the montane rainforest of the Cordillera de Talamanca, Costa Rica." Phyllomedusa: Journal of Herpetology 17.2 (2018): 211-232.
Brachycephaloidea	Craugastoridae	Craugastor	Craugastor amniscola	n/a	38.8	20.8	3.7	Campbell, Jonathan A., and Jay M. Savage. "Taxonomic reconsideration of Middle American frogs of the Eleutherodactylus rugulosus group (Anura: Leptodactylidae): a reconnaissance of subtle nuances among frogs." Herpetological Monographs (2000): 186-292.	n/a	n/a	n/a	n/a
Brachycephaloidea	Craugastoridae	Craugastor	Craugastor berkenbuschii	n/a	43.4	n/a	3.6	Campbell, Jonathan A., and Jay M. Savage. "Taxonomic reconsideration of Middle American frogs of the Eleutherodactylus rugulosus group (Anura: Leptodactylidae): a reconnaissance of subtle nuances among frogs." Herpetological Monographs (2000): 186-292.	n/a	n/a	YES	Campbell, Jonathan A., and Jay M. Savage. "Taxonomic reconsideration of Middle American frogs of the Eleutherodactylus rugulosus group (Anura: Leptodactylidae): a reconnaissance of subtle nuances among frogs." Herpetological Monographs (2000): 186-292.
Brachycephaloidea	Craugastoridae	Craugastor	Craugastor charadra	n/a	33.3	20.5	3.7	Campbell, Jonathan A., and Jay M. Savage. "Taxonomic reconsideration of Middle American frogs of the Eleutherodactylus rugulosus group (Anura: Leptodactylidae): a reconnaissance of subtle nuances among frogs." Herpetological Monographs (2000): 186-292.	n/a	n/a	No	Campbell, Jonathan A., and Jay M. Savage. "Taxonomic reconsideration of Middle American frogs of the Eleutherodactylus rugulosus group (Anura: Leptodactylidae): a reconnaissance of subtle nuances among frogs." Herpetological Monographs (2000): 186-292.
Brachycephaloidea	Craugastoridae	Craugastor	Craugastor fitzingeri	CH6791	34.7	20.8	3		3000	Lynch, J. D., and C. W. Myers. 1983. Frogs of the fitzingeri group of Eleutherodactylus in eastern Panama and Chocoan South America (Leptodactylidae). Bulletin of the American Museum of Natural History 175: 481–572	n/a	n/a
Brachycephaloidea	Craugastoridae	Craugastor	Craugastor fitzingeri	CH6619	43	24.1	2.8		n/a	n/a	n/a	n/a
Brachycephaloidea	Craugastoridae	Craugastor	Craugastor fitzingeri	CH6861	55.4	30.5	3.5		n/a	n/a	n/a	n/a
Brachycephaloidea	Craugastoridae	Craugastor	Craugastor fitzingeri	CH6871	52.1	31.8	3.5		n/a	n/a	n/a	n/a
Brachycephaloidea	Craugastoridae	Craugastor	Craugastor fitzingeri	CH7955	25.7	16.6	3.1		n/a	n/a	n/a	n/a
Brachycephaloidea	Craugastoridae	Craugastor	Craugastor fitzingeri	CH8112	25.9	17.3	3.4		n/a	n/a	n/a	n/a
Brachycephaloidea	Craugastoridae	Craugastor	Craugastor laevissimus	n/a	35.6	20.5	1.9	Campbell, Jonathan A., and Jay M. Savage. "Taxonomic reconsideration of Middle American frogs of the Eleutherodactylus rugulosus group (Anura: Leptodactylidae): a reconnaissance of subtle nuances among frogs." Herpetological Monographs (2000): 186-292.	n/a	n/a	No	Campbell, Jonathan A., and Jay M. Savage. "Taxonomic reconsideration of Middle American frogs of the Eleutherodactylus rugulosus group (Anura: Leptodactylidae): a reconnaissance of subtle nuances among frogs." Herpetological Monographs (2000): 186-292.
Brachycephaloidea	Craugastoridae	Craugastor	Craugastor longirostris	CH4453	34.4	21.7	3.1		n/a	n/a	n/a	n/a
Brachycephaloidea	Craugastoridae	Craugastor	Craugastor longirostris	CH8275	50.1	32.5	2.7		n/a	n/a	n/a	n/a
Brachycephaloidea	Craugastoridae	Craugastor	Craugastor longirostris	CH8851	43.4	31	3.2		n/a	n/a	n/a	n/a
Brachycephaloidea	Craugastoridae	Craugastor	Craugastor longirostris	CH9040	33.1	22.2	3.5		n/a	n/a	n/a	n/a
Brachycephaloidea	Craugastoridae	Craugastor	Craugastor longirostris	CH9047	46.7	31.7	3.2		n/a	n/a	n/a	n/a
Brachycephaloidea	Craugastoridae	Craugastor	Craugastor longirostris	CH9053	34.5	22.5	3.3		n/a	n/a	n/a	n/a
Brachycephaloidea	Craugastoridae	Craugastor	Craugastor melanostictus	ZUEC-AMP 19169	33.1	19.26	1.37		n/a	n/a	n/a	n/a
Brachycephaloidea	Craugastoridae	Craugastor	Craugastor palenque	n/a	43.9	24	3.6	Campbell, Jonathan A., and Jay M. Savage. "Taxonomic reconsideration of Middle American frogs of the Eleutherodactylus rugulosus group (Anura: Leptodactylidae): a reconnaissance of subtle nuances among frogs." Herpetological Monographs (2000): 186-292.	n/a	n/a	YES	Campbell, Jonathan A., and Jay M. Savage. "Taxonomic reconsideration of Middle American frogs of the Eleutherodactylus rugulosus group (Anura: Leptodactylidae): a reconnaissance of subtle nuances among frogs." Herpetological Monographs (2000): 186-292.
Brachycephaloidea	Craugastoridae	Craugastor	Craugastor pelorus	n/a	56.8	28.9	4.9	Campbell, Jonathan A., and Jay M. Savage. "Taxonomic reconsideration of Middle American frogs of the Eleutherodactylus rugulosus group (Anura: Leptodactylidae): a reconnaissance of subtle nuances among frogs." Herpetological Monographs (2000): 186-292.	n/a	n/a	YES	Campbell, Jonathan A., and Jay M. Savage. "Taxonomic reconsideration of Middle American frogs of the Eleutherodactylus rugulosus group (Anura: Leptodactylidae): a reconnaissance of subtle nuances among frogs." Herpetological Monographs (2000): 186-292.
Brachycephaloidea	Craugastoridae	Craugastor	Craugastor podiciferus	ZUEC-AMP 21731	20.65	11.38	1.16		n/a	n/a	n/a	n/a
Brachycephaloidea	Craugastoridae	Craugastor	Craugastor podiciferus	ZUEC-AMP 21732	23.35	15.03	1.48		n/a	n/a	n/a	n/a
Brachycephaloidea	Craugastoridae	Craugastor	Craugastor raniformis	CH9103	36.7	23.3	3.7		1400	Lynch, J. D., and C. W. Myers. 1983. Frogs of the fitzingeri group of Eleutherodactylus in eastern Panama and Chocoan South America (Leptodactylidae). Bulletin of the American Museum of Natural History 175: 481–572	n/a	n/a
Brachycephaloidea	Craugastoridae	Craugastor	Craugastor raniformis	CH10063	42.6	24	3.7		n/a	n/a	n/a	n/a
Brachycephaloidea	Craugastoridae	Craugastor	Craugastor raniformis	CH10115	38.7	21.7	3.8		n/a	n/a	n/a	n/a
Brachycephaloidea	Craugastoridae	Craugastor	Craugastor raniformis	CH3235	59.4	37.2	4.1		n/a	n/a	n/a	n/a
Brachycephaloidea	Craugastoridae	Craugastor	Craugastor raniformis	CH6344	61.8	41.1	4.3		n/a	n/a	n/a	n/a
Brachycephaloidea	Craugastoridae	Craugastor	Craugastor raniformis	CH7125	64.8	41	4.2		n/a	n/a	n/a	n/a
Brachycephaloidea	Craugastoridae	Craugastor	Craugastor rivulus	n/a	39.2	22.7	3.4	Campbell, Jonathan A., and Jay M. Savage. "Taxonomic reconsideration of Middle American frogs of the Eleutherodactylus rugulosus group (Anura: Leptodactylidae): a reconnaissance of subtle nuances among frogs." Herpetological Monographs (2000): 186-292.	n/a	n/a	YES	Campbell, Jonathan A., and Jay M. Savage. "Taxonomic reconsideration of Middle American frogs of the Eleutherodactylus rugulosus group (Anura: Leptodactylidae): a reconnaissance of subtle nuances among frogs." Herpetological Monographs (2000): 186-292.
Brachycephaloidea	Craugastoridae	Craugastor	Craugastor underwoodi	ZUEC-AMP 18762	22.68	12.54	1.46		n/a	n/a	n/a	n/a
Brachycephaloidea	Craugastoridae	Craugastor	Craugastor vulcani	n/a	38	22.6	3.9	Campbell, Jonathan A., and Jay M. Savage. "Taxonomic reconsideration of Middle American frogs of the Eleutherodactylus rugulosus group (Anura: Leptodactylidae): a reconnaissance of subtle nuances among frogs." Herpetological Monographs (2000): 186-292.	n/a	n/a	YES	Campbell, Jonathan A., and Jay M. Savage. "Taxonomic reconsideration of Middle American frogs of the Eleutherodactylus rugulosus group (Anura: Leptodactylidae): a reconnaissance of subtle nuances among frogs." Herpetological Monographs (2000): 186-292.
Brachycephaloidea	Craugastoridae	Dischidodactylus	Dischidodactylus duidensis	A.M.N.H. No. 23194	22.9	12.5	Tympanum indistinct	Rivero, J. A. 1968. A new species of Elosia (Amphibia, Salientia) from Mt. Duida, Venezuela. American Museum Novitates 2334: 1–9 (http://digitallibrary.amnh.org/handle/2246/2544).	n/a	n/a	n/a	n/a
Brachycephaloidea	Craugastoridae	Euparkerella	Euparkerella cryptica	n/a	15.7	6.6	Tympanum indistinct	Hepp, F. S. F. dos S., S. P. de Carvalho-e-Silva, M. P. T. de Carvalho-e-Silva, and M. Folly. 2015. A fifth species of the genus Euparkerella (Griffths, 1959), the advertisement calls of E. robusta Izecksohn, 1988 and E. tridactyla Izecksohn, 1988, and a key for the Euparkerella species (Anura: Brachycephaloidea: Craugastoridae) . Zootaxa 3973: 251–270.	3193.5	Hepp, F. S. F. dos S., S. P. de Carvalho-e-Silva, M. P. T. de Carvalho-e-Silva, and M. Folly. 2015. A fifth species of the genus Euparkerella (Griffths, 1959), the advertisement calls of E. robusta Izecksohn, 1988 and E. tridactyla Izecksohn, 1988, and a key for the Euparkerella species (Anura: Brachycephaloidea: Craugastoridae) . Zootaxa 3973: 251–270.	No	Hepp, F. S. F. dos S., S. P. de Carvalho-e-Silva, M. P. T. de Carvalho-e-Silva, and M. Folly. 2015. A fifth species of the genus Euparkerella (Griffths, 1959), the advertisement calls of E. robusta Izecksohn, 1988 and E. tridactyla Izecksohn, 1988, and a key for the Euparkerella species (Anura: Brachycephaloidea: Craugastoridae) . Zootaxa 3973: 251–270.
Brachycephaloidea	Craugastoridae	Haddadus	Haddadus aramunha	n/a	40.3	21.3	2.5	Cassimiro, Jose, Vanessa K. Verdade, and Miguel T. Rodrigues. "A large and enigmatic new eleutherodactyline frog (Anura, Strabomantidae) from Serra do Sincorá, Espinhaço range, Northeastern Brazil." Zootaxa 1761.1 (2008): 59-68.	n/a	n/a	No	Cassimiro, Jose, Vanessa K. Verdade, and Miguel T. Rodrigues. "A large and enigmatic new eleutherodactyline frog (Anura, Strabomantidae) from Serra do Sincorá, Espinhaço range, Northeastern Brazil." Zootaxa 1761.1 (2008): 59-68.
Brachycephaloidea	Craugastoridae	Haddadus	Haddadus binotatus	ZUEC-AMP 21851	46.22	28.87	3.01		1580	Carvalho and Martins 2012	n/a	n/a
Brachycephaloidea	Craugastoridae	Haddadus	Haddadus binotatus	ZUEC-AMP 21848	39.98	22.94	2.7		n/a	n/a	n/a	n/a
Brachycephaloidea	Craugastoridae	Haddadus	Haddadus binotatus	ZUEC-AMP 21850	47.13	30.09	2.9		n/a	n/a	n/a	n/a
Brachycephaloidea	Craugastoridae	Haddadus	Haddadus binotatus	ZUEC-AMP 21852	40.84	25.81	2.83		n/a	n/a	n/a	n/a
Brachycephaloidea	Craugastoridae	Haddadus	Haddadus binotatus	ZUEC-AMP 21875	38.26	23.11	2.28		n/a	n/a	n/a	n/a
Brachycephaloidea	Craugastoridae	Haddadus	Haddadus binotatus	ZUEC-AMP 23310	53.57	33.04	3.39		n/a	n/a	n/a	n/a
Brachycephaloidea	Craugastoridae	Holoaden	Holoaden pholeter	MNRJ 53482	41.6	18	Tympanum indistinct	Pombal, J. P., Jr., C. C. Siqueira, T. A. Dorigo, D. Vrcibradic, and C. F. D. da Rocha. 2008. A third species of the rare frog genus Holoaden (Terrarana, Strabomantidae) from a montane rainforest area of southeastern Brazil. Zootaxa 1938: 61–68.	n/a	n/a	No	Pombal, J. P., Jr., C. C. Siqueira, T. A. Dorigo, D. Vrcibradic, and C. F. D. da Rocha. 2008. A third species of the rare frog genus Holoaden (Terrarana, Strabomantidae) from a montane rainforest area of southeastern Brazil. Zootaxa 1938: 61–68.
Brachycephaloidea	Craugastoridae	Lynchius	Lynchius oblitus	n/a	21.7	6.2	1.6	Motta, Ana P., et al. "Molecular phylogenetics and taxonomy of the Andean genus Lynchius Hedges, Duellman, and Heinicke 2008 (Anura: Craugastoridae)." Herpetological Monographs30.1 (2016): 119-142.	n/a	n/a	No	Motta, Ana P., et al. "Molecular phylogenetics and taxonomy of the Andean genus Lynchius Hedges, Duellman, and Heinicke 2008 (Anura: Craugastoridae)." Herpetological Monographs30.1 (2016): 119-142.
Brachycephaloidea	Craugastoridae	Lynchius	Lynchius tabaconas	n/a	28.3	n/a	2.3	Motta, Ana P., et al. "Molecular phylogenetics and taxonomy of the Andean genus Lynchius Hedges, Duellman, and Heinicke 2008 (Anura: Craugastoridae)." Herpetological Monographs30.1 (2016): 119-142.	n/a	n/a	No	Motta, Ana P., et al. "Molecular phylogenetics and taxonomy of the Andean genus Lynchius Hedges, Duellman, and Heinicke 2008 (Anura: Craugastoridae)." Herpetological Monographs30.1 (2016): 119-142.
Brachycephaloidea	Craugastoridae	Niceforonia	Niceforonia aderca	n/a	18.8	8.3	0.9	Lynch, John D. "A new species of frog from northeastern Colombia (genus Eleutherodactylus: Leptodactylidae)." Revista de la Academia Colombiana de Ciencias Exactas, Físicas y Naturales 28 (2003): 287-289.	n/a	n/a	No	Lynch, John D. "A new species of frog from northeastern Colombia (genus Eleutherodactylus: Leptodactylidae)." Revista de la Academia Colombiana de Ciencias Exactas, Físicas y Naturales 28 (2003): 287-289.
Brachycephaloidea	Craugastoridae	Noblella	Noblella coloma	n/a	14.55	6.73	0.75	Guayasamin, Juan M., and Andrea Teran-Valdez. "A new species of Noblella (Amphibia: Strabomantidae) from the western slopes of the Andes of Ecuador." Zootaxa 2161.1 (2009): 47-59.	n/a	n/a	No	Guayasamin, Juan M., and Andrea Teran-Valdez. "A new species of Noblella (Amphibia: Strabomantidae) from the western slopes of the Andes of Ecuador." Zootaxa 2161.1 (2009): 47-59.
Brachycephaloidea	Craugastoridae	Noblella	Noblella losamigos	n/a	10.08	5.34	0.52	Santa-Cruz, Roy, et al. "A new species of terrestrial-breeding frog (Amphibia, Strabomantidae, Noblella) from the upper Madre de Dios watershed, Amazonian Andes and lowlands of southern Peru." Diversity 11.9 (2019): 145.	n/a	n/a	No	Santa-Cruz, Roy, et al. "A new species of terrestrial-breeding frog (Amphibia, Strabomantidae, Noblella) from the upper Madre de Dios watershed, Amazonian Andes and lowlands of southern Peru." Diversity 11.9 (2019): 145.
Brachycephaloidea	Craugastoridae	Oreobates	Oreobates antrum	n/a	22.7	12.5	2	Vaz-Silva, Wilian, et al. "A new cryptic species of Oreobates (Anura: Craugastoridae) from the seasonally dry tropical forest of central Brazil." Zootaxa 4441.1 (2018): 89-108.	2430	Vaz-Silva, Wilian, et al. "A new cryptic species of Oreobates (Anura: Craugastoridae) from the seasonally dry tropical forest of central Brazil." Zootaxa 4441.1 (2018): 89-108.	No	Vaz-Silva, Wilian, et al. "A new cryptic species of Oreobates (Anura: Craugastoridae) from the seasonally dry tropical forest of central Brazil." Zootaxa 4441.1 (2018): 89-108.
Brachycephaloidea	Craugastoridae	Oreobates	Oreobates heterodactylus	ZUEC-AMP 14116	25.09	12.86	2.17		2677	Vaz-Silva, Wilian, et al. "A new cryptic species of Oreobates (Anura: Craugastoridae) from the seasonally dry tropical forest of central Brazil." Zootaxa 4441.1 (2018): 89-108.	n/a	n/a
Brachycephaloidea	Craugastoridae	Oreobates	Oreobates heterodactylus	ZUEC-AMP 14117	29.13	13.68	2.52		n/a	n/a	n/a	n/a
Brachycephaloidea	Craugastoridae	Oreobates	Oreobates heterodactylus	ZUEC-AMP 14118	26.18	12.35	2.48		n/a	n/a	n/a	n/a
Brachycephaloidea	Craugastoridae	Oreobates	Oreobates heterodactylus	ZUEC-AMP 14119	27.62	12.87	2.42		n/a	n/a	n/a	n/a
Brachycephaloidea	Craugastoridae	Oreobates	Oreobates quixensis	ZUEC-AMP 11024	51.26	27.01	3.56		990	Vaz-Silva, Wilian, et al. "A new cryptic species of Oreobates (Anura: Craugastoridae) from the seasonally dry tropical forest of central Brazil." Zootaxa 4441.1 (2018): 89-108.	n/a	n/a
Brachycephaloidea	Craugastoridae	Oreobates	Oreobates quixensis	ZUEC-AMP 10590	34.02	18.57	2.04		995	Heyer W.R. & Gascon, C. (1995) Collection notes and call characteristics for Ischnocnema quixensis and Phyzelaphryne miriamae (Amphibia: Anura; Leptodactylidae). Journal of Herpetology, 29; 304–307.	n/a	n/a
Brachycephaloidea	Craugastoridae	Oreobates	Oreobates quixensis	ZUEC-AMP 10589	41.87	24.32	2.61		n/a	n/a	n/a	n/a
Brachycephaloidea	Craugastoridae	Oreobates	Oreobates quixensis	ZUEC-AMP 10608	49.83	26.41	3.44		n/a	n/a	n/a	n/a
Brachycephaloidea	Craugastoridae	Oreobates	Oreobates quixensis	ZUEC-AMP 10620	36.03	20.76	2.9		n/a	n/a	n/a	n/a
Brachycephaloidea	Craugastoridae	Oreobates	Oreobates quixensis	ZUEC-AMP 11019	48.48	27.32	3.16		n/a	n/a	n/a	n/a
Brachycephaloidea	Craugastoridae	Phrynopus	Phrynopus peruanus	ZUEC-AMP 21777	28.71	9.84	1.46		n/a	n/a	n/a	n/a
Brachycephaloidea	Craugastoridae	Phrynopus	Phrynopus peruanus	ZUEC-AMP 21778	26.36	10.19	1.66		n/a	n/a	n/a	n/a
Brachycephaloidea	Craugastoridae	Pristimantis	Pristimantis abakapa	n/a	21.1	10.5	0.7	Rojas-Runjaic, Fernando JM, et al. "Terraranans of the Lost World: a new species of Pristimantis (Amphibia, Craugastoridae) from Abakapá-tepui in the Chimantá massif, Venezuelan Guayana, and additions to the knowledge of P. muchimuk." Zootaxa 3686.3 (2013): 335-355.	n/a	n/a	YES	Rojas-Runjaic, Fernando JM, et al. "Terraranans of the Lost World: a new species of Pristimantis (Amphibia, Craugastoridae) from Abakapá-tepui in the Chimantá massif, Venezuelan Guayana, and additions to the knowledge of P. muchimuk." Zootaxa 3686.3 (2013): 335-355.
Brachycephaloidea	Craugastoridae	Pristimantis	Pristimantis acuminatus	ZUEC-AMP 8455	19.92	10.4	0.7		n/a	n/a	n/a	n/a
Brachycephaloidea	Craugastoridae	Pristimantis	Pristimantis acuminatus	ZUEC-AMP 8456	20.68	10.9	0.72		n/a	n/a	n/a	n/a
Brachycephaloidea	Craugastoridae	Pristimantis	Pristimantis adiastolus	n/a	28	17.3	2	Duellman, William E., and S. Blair Hedges. "Three new species of Pristimantis (Lissamphibia, Anura) from montane forests of the Cordillera Yanachaga in Central Peru." Phyllomedusa: Journal of Herpetology 6.2 (2007): 119-135.	n/a	n/a	No	Duellman, William E., and S. Blair Hedges. "Three new species of Pristimantis (Lissamphibia, Anura) from montane forests of the Cordillera Yanachaga in Central Peru." Phyllomedusa: Journal of Herpetology 6.2 (2007): 119-135.
Brachycephaloidea	Craugastoridae	Pristimantis	Pristimantis afrox	n/a	30.7	19.8	1.8	Reyes-Puig, Carolina, et al. "Relaciones filogenéticas del subgénero Hypodictyon (Anura: Strabomantidae: Pristimantis) con la descripción de tres especies nuevas de la región del Chocó." Revista mexicana de biodiversidad 91 (2020).	n/a	n/a	No	Reyes-Puig, Carolina, et al. "Relaciones filogenéticas del subgénero Hypodictyon (Anura: Strabomantidae: Pristimantis) con la descripción de tres especies nuevas de la región del Chocó." Revista mexicana de biodiversidad 91 (2020).
Brachycephaloidea	Craugastoridae	Pristimantis	Pristimantis albertus	n/a	20.7	11	1.4	Duellman, William E., and S. Blair Hedges. "Three new species of Pristimantis (Lissamphibia, Anura) from montane forests of the Cordillera Yanachaga in Central Peru." Phyllomedusa: Journal of Herpetology 6.2 (2007): 119-135.	n/a	n/a	No	Duellman, William E., and S. Blair Hedges. "Three new species of Pristimantis (Lissamphibia, Anura) from montane forests of the Cordillera Yanachaga in Central Peru." Phyllomedusa: Journal of Herpetology 6.2 (2007): 119-135.
Brachycephaloidea	Craugastoridae	Pristimantis	Pristimantis albujai	n/a	18.1	9.5	1.3	Brito, Jorge, Diego Batallas, and Mario H. Yánez-Muñoz. "Ranas terrestres Pristimantis (Anura: Craugastoridae) de los bosques montanos del río Upano, Ecuador: Lista anotada, patrones de diversidad y descripción de cuatro especies nuevas." Neotropical Biodiversity 3.1 (2017): 125-156.	n/a	n/a	No	Brito, Jorge, Diego Batallas, and Mario H. Yánez-Muñoz. "Ranas terrestres Pristimantis (Anura: Craugastoridae) de los bosques montanos del río Upano, Ecuador: Lista anotada, patrones de diversidad y descripción de cuatro especies nuevas." Neotropical Biodiversity 3.1 (2017): 125-156.
Brachycephaloidea	Craugastoridae	Pristimantis	Pristimantis almendariz	n/a	38.7	21.18	1.48	Brito, Jorge, and Glenda Pozo-Zamora. "Una nueva especie de rana terrestre del género Pristimantis (Amphibia: Craugastoridae), de la Cordillera de Kutukú, Ecuador." Papéis Avulsos de Zoologia 53.24 (2013): 315-325.	n/a	n/a	No	Brito, Jorge, and Glenda Pozo-Zamora. "Una nueva especie de rana terrestre del género Pristimantis (Amphibia: Craugastoridae), de la Cordillera de Kutukú, Ecuador." Papéis Avulsos de Zoologia 53.24 (2013): 315-325.
Brachycephaloidea	Craugastoridae	Pristimantis	Pristimantis altamazonicus	ZUEC-AMP 18755	18.19	9.38	0.65		n/a	n/a	n/a	n/a
Brachycephaloidea	Craugastoridae	Pristimantis	Pristimantis altamazonicus	ZUEC-AMP 18791	22.57	12.25	0.93		n/a	n/a	n/a	n/a
Brachycephaloidea	Craugastoridae	Pristimantis	Pristimantis altamazonicus	ZUEC-AMP 21169	27.59	12.2	1.3		n/a	n/a	n/a	n/a
Brachycephaloidea	Craugastoridae	Pristimantis	Pristimantis amaguanae	n/a	16.3	8.4	0.8	Ron, Santiago R., et al. "Three new species of frogs of the genus Pristimantis (Anura, Strabomantidae) with a redefinition of the P. lacrimosus species group." ZooKeys 993 (2020): 121.	n/a	n/a	YES	Ron, Santiago R., et al. "Three new species of frogs of the genus Pristimantis (Anura, Strabomantidae) with a redefinition of the P. lacrimosus species group." ZooKeys 993 (2020): 121.
Brachycephaloidea	Craugastoridae	Pristimantis	Pristimantis ameliae	n/a	23.4	10	1	Barrio-Amorós, César L. "A new Pristimantis Jiménez de la Espada, 1870 (Anura: Strabomantidae) from the cloud forest in the Venezuelan Andes." Anartia 23 (2011): 17-26.	n/a	n/a	No	Barrio-Amorós, César L. "A new Pristimantis Jiménez de la Espada, 1870 (Anura: Strabomantidae) from the cloud forest in the Venezuelan Andes." Anartia 23 (2011): 17-26.
Brachycephaloidea	Craugastoridae	Pristimantis	Pristimantis amydrotus	n/a	25.8	13.4	1	Duellman, William E., and Edgar Lehr. "Frogs of the genus Eleutherodactylus (Leptodactylidae) in the Cordillera Occidental in Peru with descriptions of three new species." (2007).	n/a	n/a	n/a	n/a
Brachycephaloidea	Craugastoridae	Pristimantis	Pristimantis andinogigas	n/a	38.5	17.9	1.8	Yánez-Muñoz, Mario H., et al. "A new giant Pristimantis (Anura, Craugastoridae) from the paramos of the Podocarpus National Park, southern Ecuador." ZooKeys 852 (2019): 137.	1800	Yánez-Muñoz, Mario H., et al. "A new giant Pristimantis (Anura, Craugastoridae) from the paramos of the Podocarpus National Park, southern Ecuador." ZooKeys 852 (2019): 137.	No	Yánez-Muñoz, Mario H., et al. "A new giant Pristimantis (Anura, Craugastoridae) from the paramos of the Podocarpus National Park, southern Ecuador." ZooKeys 852 (2019): 137.
Brachycephaloidea	Craugastoridae	Pristimantis	Pristimantis andinognomus	n/a	12.1	6.1	0.8	Lehr, Edgar, and Luis A. Coloma. "A minute new ecuadorian Andean frog (Anura: Strabomantidae, Pristimantis)." Herpetologica 64.3 (2008): 354-367.	n/a	n/a	No	Lehr, Edgar, and Luis A. Coloma. "A minute new ecuadorian Andean frog (Anura: Strabomantidae, Pristimantis)." Herpetologica 64.3 (2008): 354-367.
Brachycephaloidea	Craugastoridae	Pristimantis	Pristimantis anemerus	n/a	20.4	10.7	1.1	Duellman, William E., and Jennifer B. Pramuk. "Frogs of the genus Eleutherodactylus (Anura: Leptodactylidae) in the Andes of northern Peru." (1999).	n/a	n/a	No	Duellman, William E., and Jennifer B. Pramuk. "Frogs of the genus Eleutherodactylus (Anura: Leptodactylidae) in the Andes of northern Peru." (1999).
Brachycephaloidea	Craugastoridae	Pristimantis	Pristimantis aquilonaris	n/a	15.1	8.6	0.8	Lehr, E., C. Aguilar, K. Siu-Ting, and J. C. Jordán. 2007. Three new species of Pristimantis(Anura: Leptodactylidae) from the Cordillera de Huancabamba in northern Peru. Herpetologica 63: 519–536.	n/a	n/a	No	Lehr, E., C. Aguilar, K. Siu-Ting, and J. C. Jordán. 2007. Three new species of Pristimantis(Anura: Leptodactylidae) from the Cordillera de Huancabamba in northern Peru. Herpetologica 63: 519–536.
Brachycephaloidea	Craugastoridae	Pristimantis	Pristimantis ardilae	n/a	27.5	15.3	0.9	Acevedo, Aldemar A., Orlando Armesto, and R. Eduardo Palma. "Two new species of Pristimantis (Anura: Craugastoridae) with notes on the distribution of the genus in northeastern Colombia." Zootaxa 4750.4 (2020): 499-523.	n/a	n/a	No	Acevedo, Aldemar A., Orlando Armesto, and R. Eduardo Palma. "Two new species of Pristimantis (Anura: Craugastoridae) with notes on the distribution of the genus in northeastern Colombia." Zootaxa 4750.4 (2020): 499-523.
Brachycephaloidea	Craugastoridae	Pristimantis	Pristimantis atillo	n/a	24.7	n/a	1.2	Páez, Nadia B., and Santiago R. Ron. "Systematics of Huicundomantis, a new subgenus of Pristimantis (Anura, Strabomantidae) with extraordinary cryptic diversity and eleven new species." ZooKeys 868 (2019): 1.	n/a	n/a	No	Páez, Nadia B., and Santiago R. Ron. "Systematics of Huicundomantis, a new subgenus of Pristimantis (Anura, Strabomantidae) with extraordinary cryptic diversity and eleven new species." ZooKeys 868 (2019): 1.
Brachycephaloidea	Craugastoridae	Pristimantis	Pristimantis aureolineatus	n/a	24.3	12.9	1.1	Guayasamin, Juan M., et al. "A new species of frog of the Eleutherodactylus lacrimosus assemblage (Leptodactylidae) from the western Amazon Basin, with comments on the utility of canopy surveys in lowland rainforest." Herpetologica 62.2 (2006): 191-202.	n/a	n/a	No	Guayasamin, Juan M., et al. "A new species of frog of the Eleutherodactylus lacrimosus assemblage (Leptodactylidae) from the western Amazon Basin, with comments on the utility of canopy surveys in lowland rainforest." Herpetologica 62.2 (2006): 191-202.
Brachycephaloidea	Craugastoridae	Pristimantis	Pristimantis aureoventris	n/a	20.4	11.4	0.9	Kok, Philippe JR, D. Bruce Means, and Franky Bossuyt. "A new highland species of Pristimantis Jiménez de la Espada, 1871 (Anura: Strabomantidae) from the Pantepui region, northern South America." Zootaxa 2934.1 (2011): 1-19.	2295	Kok, Philippe JR, D. Bruce Means, and Franky Bossuyt. "A new highland species of Pristimantis Jiménez de la Espada, 1871 (Anura: Strabomantidae) from the Pantepui region, northern South America." Zootaxa 2934.1 (2011): 1-19.	No	Kok, Philippe JR, D. Bruce Means, and Franky Bossuyt. "A new highland species of Pristimantis Jiménez de la Espada, 1871 (Anura: Strabomantidae) from the Pantepui region, northern South America." Zootaxa 2934.1 (2011): 1-19.
Brachycephaloidea	Craugastoridae	Pristimantis	Pristimantis avius	n/a	22.3	12.9	1.15	Myers, Charles W., and Maureen A. Donnelly. "A tepui herpetofauna on a granitic mountain (Tamacuari) in the borderland between Venezuela and Brazil: report from the Phipps Tapirapecó Expedition. American Museum novitates; no. 3213." (1997).	n/a	n/a	No	Myers, Charles W., and Maureen A. Donnelly. "A tepui herpetofauna on a granitic mountain (Tamacuari) in the borderland between Venezuela and Brazil: report from the Phipps Tapirapecó Expedition. American Museum novitates; no. 3213." (1997).
Brachycephaloidea	Craugastoridae	Pristimantis	Pristimantis barrigai	n/a	26.9	15.3	1.1	Brito, Jorge, and Ana Almendáriz. "Una especie nueva de rana Pristimantis (Amphibia: Strabomantidae) de ojos rojos de la Cordillera de Cóndor, Ecuador." (2018).	n/a	n/a	No	Brito, Jorge, and Ana Almendáriz. "Una especie nueva de rana Pristimantis (Amphibia: Strabomantidae) de ojos rojos de la Cordillera de Cóndor, Ecuador." (2018).
Brachycephaloidea	Craugastoridae	Pristimantis	Pristimantis bellator	n/a	18.1	10.1	0.8	Lehr, E., C. Aguilar, K. Siu-Ting, and J. C. Jordán. 2007. Three new species of Pristimantis(Anura: Leptodactylidae) from the Cordillera de Huancabamba in northern Peru. Herpetologica 63: 519–536.	n/a	n/a	No	Lehr, E., C. Aguilar, K. Siu-Ting, and J. C. Jordán. 2007. Three new species of Pristimantis(Anura: Leptodactylidae) from the Cordillera de Huancabamba in northern Peru. Herpetologica 63: 519–536.
Brachycephaloidea	Craugastoridae	Pristimantis	Pristimantis bicantus	n/a	13.8	3.4	1.2	Guayasamin, Juan M., and W. Chris Funk. "The amphibian community at Yanayacu Biological Station, Ecuador, with a comparison of vertical microhabitat use among Pristimantis species and the description of a new species of the Pristimantis myersi group." Zootaxa 2220.2009 (2009): 41-66.	3160	Guayasamin, Juan M., and W. Chris Funk. "The amphibian community at Yanayacu Biological Station, Ecuador, with a comparison of vertical microhabitat use among Pristimantis species and the description of a new species of the Pristimantis myersi group." Zootaxa 2220.2009 (2009): 41-66.	No	Guayasamin, Juan M., and W. Chris Funk. "The amphibian community at Yanayacu Biological Station, Ecuador, with a comparison of vertical microhabitat use among Pristimantis species and the description of a new species of the Pristimantis myersi group." Zootaxa 2220.2009 (2009): 41-66.
Brachycephaloidea	Craugastoridae	Pristimantis	Pristimantis bogotensis	ZUEC-AMP 21733	23.1	10.63	1.29		n/a	n/a	n/a	n/a
Brachycephaloidea	Craugastoridae	Pristimantis	Pristimantis bogotensis	ZUEC-AMP 21734	21.47	10.37	1.25		n/a	n/a	n/a	n/a
Brachycephaloidea	Craugastoridae	Pristimantis	Pristimantis bounides	n/a	18.2	8.2	0.9	Lehr, E. D. G. A. R., et al. "Three new species of Pristimantis (Amphibia, Anura, Craugastoridae) from upper montane forests and high Andean grasslands of the Pui Pui Protected Forest in central Peru." Zootaxa 4299.3 (2017): 301-336.	n/a	n/a	No	Lehr, E. D. G. A. R., et al. "Three new species of Pristimantis (Amphibia, Anura, Craugastoridae) from upper montane forests and high Andean grasslands of the Pui Pui Protected Forest in central Peru." Zootaxa 4299.3 (2017): 301-336.
Brachycephaloidea	Craugastoridae	Pristimantis	Pristimantis bowara	n/a	26.6	13.3	1.3	Acevedo, Aldemar A., Orlando Armesto, and R. Eduardo Palma. "Two new species of Pristimantis (Anura: Craugastoridae) with notes on the distribution of the genus in northeastern Colombia." Zootaxa 4750.4 (2020): 499-523.	n/a	n/a	No	Acevedo, Aldemar A., Orlando Armesto, and R. Eduardo Palma. "Two new species of Pristimantis (Anura: Craugastoridae) with notes on the distribution of the genus in northeastern Colombia." Zootaxa 4750.4 (2020): 499-523.
Brachycephaloidea	Craugastoridae	Pristimantis	Pristimantis briceni	n/a	36	18.8	1.5	La Marca, Enrique. "Sinopsis taxonómica de dos géneros nuevos de anfibios (Anura: Leptodactylidae) de los Andes de Venezuela." Herpetotropicos 3.2 (2007): 67-87.	n/a	n/a	No	La Marca, Enrique. "Sinopsis taxonómica de dos géneros nuevos de anfibios (Anura: Leptodactylidae) de los Andes de Venezuela." Herpetotropicos 3.2 (2007): 67-87.
Brachycephaloidea	Craugastoridae	Pristimantis	Pristimantis bromeliaceus	n/a	n/a	n/a	n/a		4350	Batallas, Diego, and Jorge Brito. "Nueva especie de rana del género Pristimantis del grupo lacrimosus (Amphibia: Craugastoridae) del Parque Nacional Sangay, Ecuador." Papéis Avulsos de Zoologia 54.5 (2014): 51-62.	n/a	n/a
Brachycephaloidea	Craugastoridae	Pristimantis	Pristimantis buenaventura	n/a	20.1	10.4	1	Arteaga, Alejandro, et al. "Comparative phylogeography reveals cryptic diversity and repeated patterns of cladogenesis for amphibians and reptiles in northwestern Ecuador." PloS one 11.4 (2016): e0151746.	n/a	n/a	No	Arteaga, Alejandro, et al. "Comparative phylogeography reveals cryptic diversity and repeated patterns of cladogenesis for amphibians and reptiles in northwestern Ecuador." PloS one 11.4 (2016): e0151746.
Brachycephaloidea	Craugastoridae	Pristimantis	Pristimantis bustamante	n/a	15.7	8	1.1	Chaparro, Juan C., et al. "A new species of Pristimantis (Anura: Strabomantidae) from Andean cloud forests of northern Peru." Zootaxa 3192.1 (2012): 39-48.	n/a	n/a	No	Chaparro, Juan C., et al. "A new species of Pristimantis (Anura: Strabomantidae) from Andean cloud forests of northern Peru." Zootaxa 3192.1 (2012): 39-48.
Brachycephaloidea	Craugastoridae	Pristimantis	Pristimantis caeruleonotus	n/a	13	6.7	0.7	Lehr, E., C. Aguilar, K. Siu-Ting, and J. C. Jordán. 2007. Three new species of Pristimantis(Anura: Leptodactylidae) from the Cordillera de Huancabamba in northern Peru. Herpetologica 63: 519–536.	n/a	n/a	No	Lehr, E., C. Aguilar, K. Siu-Ting, and J. C. Jordán. 2007. Three new species of Pristimantis(Anura: Leptodactylidae) from the Cordillera de Huancabamba in northern Peru. Herpetologica 63: 519–536.
Brachycephaloidea	Craugastoridae	Pristimantis	Pristimantis cajanuma	n/a	14.4	7.3	0.7	Urgiles, Veronica L., et al. "Genetic delimitation of Pristimantisorestes (Lynch, 1979) and P. saturninoi Brito et al., 2017 and description of two new terrestrial frogs from the Pristimantisorestes species group (Anura, Strabomantidae)." ZooKeys 864 (2019): 111.	n/a	n/a	No	Urgiles, Veronica L., et al. "Genetic delimitation of Pristimantisorestes (Lynch, 1979) and P. saturninoi Brito et al., 2017 and description of two new terrestrial frogs from the Pristimantisorestes species group (Anura, Strabomantidae)." ZooKeys 864 (2019): 111.
Brachycephaloidea	Craugastoridae	Pristimantis	Pristimantis calcarulatus	n/a	21.6	11.6	1	Hutter, Carl R., and Juan M. Guayasamin. "Cryptic diversity concealed in the Andean cloud forests: two new species of rainfrogs (Pristimantis) uncovered by molecular and bioacoustic data." Neotropical Biodiversity 1.1 (2015): 36-59.	3318	Hutter, Carl R., and Juan M. Guayasamin. "Cryptic diversity concealed in the Andean cloud forests: two new species of rainfrogs (Pristimantis) uncovered by molecular and bioacoustic data." Neotropical Biodiversity 1.1 (2015): 36-59.	No	Hutter, Carl R., and Juan M. Guayasamin. "Cryptic diversity concealed in the Andean cloud forests: two new species of rainfrogs (Pristimantis) uncovered by molecular and bioacoustic data." Neotropical Biodiversity 1.1 (2015): 36-59.
Brachycephaloidea	Craugastoridae	Pristimantis	Pristimantis calima	n/a	24	12.1	1.2	Ospina-Sarria, Jhon Jairo, and William E. Duellman. "Two new species of Pristimantis (Amphibia: Anura: Strabomantidae) from southwestern Colombia." Herpetologica 75.1 (2019): 85-95.	n/a	n/a	No	Ospina-Sarria, Jhon Jairo, and William E. Duellman. "Two new species of Pristimantis (Amphibia: Anura: Strabomantidae) from southwestern Colombia." Herpetologica 75.1 (2019): 85-95.
Brachycephaloidea	Craugastoridae	Pristimantis	Pristimantis caniari	n/a	24.4	10.1	1.6	Jaramillo, Salomón Ramírez, et al. "Ranas terrestres en los ecosistemas surandinos de Ecuador IV: Una nueva especie de Pristimantis (Anura: Strabomantidae) de los páramos sur del Parque Nacional Sangay." ACI Avances en Ciencias e Ingenierías 10.1 (2018).	2130	Jaramillo, Salomón Ramírez, et al. "Ranas terrestres en los ecosistemas surandinos de Ecuador IV: Una nueva especie de Pristimantis (Anura: Strabomantidae) de los páramos sur del Parque Nacional Sangay." ACI Avances en Ciencias e Ingenierías 10.1 (2018).	No	Jaramillo, Salomón Ramírez, et al. "Ranas terrestres en los ecosistemas surandinos de Ecuador IV: Una nueva especie de Pristimantis (Anura: Strabomantidae) de los páramos sur del Parque Nacional Sangay." ACI Avances en Ciencias e Ingenierías 10.1 (2018).
Brachycephaloidea	Craugastoridae	Pristimantis	Pristimantis cedros	n/a	22.2	12.7	1	Hutter, Carl R., and Juan M. Guayasamin. "Cryptic diversity concealed in the Andean cloud forests: two new species of rainfrogs (Pristimantis) uncovered by molecular and bioacoustic data." Neotropical Biodiversity 1.1 (2015): 36-59.	n/a	n/a	No	Hutter, Carl R., and Juan M. Guayasamin. "Cryptic diversity concealed in the Andean cloud forests: two new species of rainfrogs (Pristimantis) uncovered by molecular and bioacoustic data." Neotropical Biodiversity 1.1 (2015): 36-59.
Brachycephaloidea	Craugastoridae	Pristimantis	Pristimantis chalceus	ZUEC-AMP 18760	21.62	11.79	0.79		n/a	n/a	n/a	n/a
Brachycephaloidea	Craugastoridae	Pristimantis	Pristimantis chocoensis	n/a	34.3	22	2	Reyes-Puig, Carolina, et al. "Relaciones filogenéticas del subgénero Hypodictyon (Anura: Strabomantidae: Pristimantis) con la descripción de tres especies nuevas de la región del Chocó." Revista mexicana de biodiversidad 91 (2020).	n/a	n/a	No	Reyes-Puig, Carolina, et al. "Relaciones filogenéticas del subgénero Hypodictyon (Anura: Strabomantidae: Pristimantis) con la descripción de tres especies nuevas de la región del Chocó." Revista mexicana de biodiversidad 91 (2020).
Brachycephaloidea	Craugastoridae	Pristimantis	Pristimantis chomskyi	n/a	28	n/a	1.3	Páez, Nadia B., and Santiago R. Ron. "Systematics of Huicundomantis, a new subgenus of Pristimantis (Anura, Strabomantidae) with extraordinary cryptic diversity and eleven new species." ZooKeys 868 (2019): 1.	n/a	n/a	No	Páez, Nadia B., and Santiago R. Ron. "Systematics of Huicundomantis, a new subgenus of Pristimantis (Anura, Strabomantidae) with extraordinary cryptic diversity and eleven new species." ZooKeys 868 (2019): 1.
Brachycephaloidea	Craugastoridae	Pristimantis	Pristimantis churuwiai	n/a	29.8	17.5	1.5	Brito, Jorge, Diego Batallas, and Mario H. Yánez-Muñoz. "Ranas terrestres Pristimantis (Anura: Craugastoridae) de los bosques montanos del río Upano, Ecuador: Lista anotada, patrones de diversidad y descripción de cuatro especies nuevas." Neotropical Biodiversity 3.1 (2017): 125-156.	n/a	n/a	No	Brito, Jorge, Diego Batallas, and Mario H. Yánez-Muñoz. "Ranas terrestres Pristimantis (Anura: Craugastoridae) de los bosques montanos del río Upano, Ecuador: Lista anotada, patrones de diversidad y descripción de cuatro especies nuevas." Neotropical Biodiversity 3.1 (2017): 125-156.
Brachycephaloidea	Craugastoridae	Pristimantis	Pristimantis cisnerosi	n/a	27.5	13.7	1.3	Reyes-Puig, Carolina, et al. "Relaciones filogenéticas del subgénero Hypodictyon (Anura: Strabomantidae: Pristimantis) con la descripción de tres especies nuevas de la región del Chocó." Revista mexicana de biodiversidad 91 (2020).	n/a	n/a	No	Reyes-Puig, Carolina, et al. "Relaciones filogenéticas del subgénero Hypodictyon (Anura: Strabomantidae: Pristimantis) con la descripción de tres especies nuevas de la región del Chocó." Revista mexicana de biodiversidad 91 (2020).
Brachycephaloidea	Craugastoridae	Pristimantis	Pristimantis conspicillatus	ZUEC-AMP 6175	40.61	24.38	2.39		n/a	n/a	n/a	n/a
Brachycephaloidea	Craugastoridae	Pristimantis	Pristimantis conspicillatus	ZUEC-AMP 11229	25.26	15.56	1.55		n/a	n/a	n/a	n/a
Brachycephaloidea	Craugastoridae	Pristimantis	Pristimantis conspicillatus	ZUEC-AMP 11230	20.71	12.85	1.43		n/a	n/a	n/a	n/a
Brachycephaloidea	Craugastoridae	Pristimantis	Pristimantis cordovae	n/a	27.1	11.2	0.9	Lehr, Edgar, and William E. Duellman. "Two new species of Eleutherodactylus (Anura: Leptodactylidae) from the Cordillera Occidental in Peru." Copeia 2007.1 (2007): 140-149.	n/a	n/a	No	Lehr, Edgar, and William E. Duellman. "Two new species of Eleutherodactylus (Anura: Leptodactylidae) from the Cordillera Occidental in Peru." Copeia 2007.1 (2007): 140-149.
Brachycephaloidea	Craugastoridae	Pristimantis	Pristimantis corrugatus	n/a	25.7	11.5	1.6	Duellman, William E., Edgar Lehr, and Pablo J. Venegas. "Two new species of Eleutherodactylus (Anura: Leptodactylidae) from the Andes of northern Peru." Zootaxa 1285.1 (2006): 51-64.	n/a	n/a	No	Duellman, William E., Edgar Lehr, and Pablo J. Venegas. "Two new species of Eleutherodactylus (Anura: Leptodactylidae) from the Andes of northern Peru." Zootaxa 1285.1 (2006): 51-64.
Brachycephaloidea	Craugastoridae	Pristimantis	Pristimantis danae	n/a	27	16.1	1.8		2210	Padial, Jose M., and Ignacio De la Riva. "Integrative taxonomy reveals cryptic Amazonian species of Pristimantis (Anura: Strabomantidae)." Zoological Journal of the Linnean Society155.1 (2009): 97-122.	n/a	n/a
Brachycephaloidea	Craugastoridae	Pristimantis	Pristimantis dendrobatoides	n/a	29.5	n/a	2.4	Means, D. Bruce, and Jay M. Savage. "Three new malodorous rainfrogs of the genus Pristimantis (Anura: Brachycephalidae) from the Wokomung Massif in west-central Guyana, South America." Zootaxa 1658.1 (2007): 39-55.	n/a	n/a	No	Means, D. Bruce, and Jay M. Savage. "Three new malodorous rainfrogs of the genus Pristimantis (Anura: Brachycephalidae) from the Wokomung Massif in west-central Guyana, South America." Zootaxa 1658.1 (2007): 39-55.
Brachycephaloidea	Craugastoridae	Pristimantis	Pristimantis deyi	n/a	22.7	12.4	1.1	Lehr, Edgar, Cindy Gregory, and Alessandro Catenazzi. "A new species of Pristimantis (Amphibia: Anura: Strabomantidae) from the Río Abiseo National Park, Peru." Zootaxa 3731.2 (2013): 201-211.	n/a	n/a	No	Lehr, Edgar, Cindy Gregory, and Alessandro Catenazzi. "A new species of Pristimantis (Amphibia: Anura: Strabomantidae) from the Río Abiseo National Park, Peru." Zootaxa 3731.2 (2013): 201-211.
Brachycephaloidea	Craugastoridae	Pristimantis	Pristimantis divnae	n/a	22.8	11.3	0.9	Lehr, Edgar, and Rudolf von May. "New species of Pristimantis (Anura: Strabomantidae) from the Amazonian lowlands of southern Peru." Journal of Herpetology 43.3 (2009): 485-494.	n/a	n/a	No	Lehr, Edgar, and Rudolf von May. "New species of Pristimantis (Anura: Strabomantidae) from the Amazonian lowlands of southern Peru." Journal of Herpetology 43.3 (2009): 485-494.
Brachycephaloidea	Craugastoridae	Pristimantis	Pristimantis duende	n/a	18.9	10.1	1	Lynch, John D. "A small amphibian fauna from a previously unexplored páramo of the Cordillera Occidental in western Colombia." Journal of Herpetology (2001): 226-231.	n/a	n/a	n/a	n/a
Brachycephaloidea	Craugastoridae	Pristimantis	Pristimantis dundeei	ZUEC-AMP 14083	29.7	16.55	2.38		n/a	n/a	n/a	n/a
Brachycephaloidea	Craugastoridae	Pristimantis	Pristimantis dundeei	ZUEC-AMP 14084	26.69	15.21	2.17		n/a	n/a	n/a	n/a
Brachycephaloidea	Craugastoridae	Pristimantis	Pristimantis dundeei	ZUEC-AMP 14086	30.87	17.7	2.35		n/a	n/a	n/a	n/a
Brachycephaloidea	Craugastoridae	Pristimantis	Pristimantis dundeei	ZUEC-AMP 14091	29.62	18.72	2.35		n/a	n/a	n/a	n/a
Brachycephaloidea	Craugastoridae	Pristimantis	Pristimantis dundeei	ZUEC-AMP 14095	28.33	18.8	2.27		n/a	n/a	n/a	n/a
Brachycephaloidea	Craugastoridae	Pristimantis	Pristimantis dundeei	ZUEC-AMP 20370	25.39	14.3	1.95		n/a	n/a	n/a	n/a
Brachycephaloidea	Craugastoridae	Pristimantis	Pristimantis enigmaticus	n/a	20.7	10.6	1	Ortega-Andrade, H. Mauricio, et al. "Insights from integrative systematics reveal cryptic diversity in Pristimantis frogs (Anura: Craugastoridae) from the Upper Amazon Basin." PloS one 10.11 (2015): e0143392.	n/a	n/a	No	Ortega-Andrade, H. Mauricio, et al. "Insights from integrative systematics reveal cryptic diversity in Pristimantis frogs (Anura: Craugastoridae) from the Upper Amazon Basin." PloS one 10.11 (2015): e0143392.
Brachycephaloidea	Craugastoridae	Pristimantis	Pristimantis erythros	n/a	36.7	26.3	1.8	Sánchez-Nivicela, Juan C., et al. "A new species of Pristimantis (Anura, Craugastoridae) from the Cajas Massif, southern Ecuador." ZooKeys 751 (2018): 113.	n/a	n/a	No	Sánchez-Nivicela, Juan C., et al. "A new species of Pristimantis (Anura, Craugastoridae) from the Cajas Massif, southern Ecuador." ZooKeys 751 (2018): 113.
Brachycephaloidea	Craugastoridae	Pristimantis	Pristimantis espedeus	n/a	22.95	12.46	1.19	Fouquet, A., Q. Martinez, E. A. Courtois, M. Dewynter, K. Pineau, P. Gaucher, M. Blanc, C. Marty, and P. J. R. Kok. 2013. A new species of the genus Pristimantis (Amphibia, Craugastoridae) associated with the moderately evelated massifs of French Guiana. Zootaxa 3750: 569–586.	2798	Fouquet, A., Q. Martinez, E. A. Courtois, M. Dewynter, K. Pineau, P. Gaucher, M. Blanc, C. Marty, and P. J. R. Kok. 2013. A new species of the genus Pristimantis (Amphibia, Craugastoridae) associated with the moderately evelated massifs of French Guiana. Zootaxa 3750: 569–586.	No	Fouquet, A., Q. Martinez, E. A. Courtois, M. Dewynter, K. Pineau, P. Gaucher, M. Blanc, C. Marty, and P. J. R. Kok. 2013. A new species of the genus Pristimantis (Amphibia, Craugastoridae) associated with the moderately evelated massifs of French Guiana. Zootaxa 3750: 569–586.
Brachycephaloidea	Craugastoridae	Pristimantis	Pristimantis farisorum	n/a	29.4	16.7	1.5	Mueses-Cisneros, Jonh Jairo, Ingrid Vanessa Perdomo-Castillo, and Belisario Cepeda-Quilindo. "A new species of the genus Pristimantis (Anura: Craugastoridae) from southwestern Colombia." Herpetotropicos 9.1-2 (2013): 37-45.	n/a	n/a	No	Mueses-Cisneros, Jonh Jairo, Ingrid Vanessa Perdomo-Castillo, and Belisario Cepeda-Quilindo. "A new species of the genus Pristimantis (Anura: Craugastoridae) from southwestern Colombia." Herpetotropicos 9.1-2 (2013): 37-45.
Brachycephaloidea	Craugastoridae	Pristimantis	Pristimantis fenestratus	ZUEC-AMP 16314	30.67	17.49	2.55		3086.3	Padial, Jose M., and Ignacio De la Riva. "Integrative taxonomy reveals cryptic Amazonian species of Pristimantis (Anura: Strabomantidae)." Zoological Journal of the Linnean Society155.1 (2009): 97-122.	n/a	n/a
Brachycephaloidea	Craugastoridae	Pristimantis	Pristimantis fenestratus	ZUEC-AMP 3940	40.01	24.5	2.99		n/a	n/a	n/a	n/a
Brachycephaloidea	Craugastoridae	Pristimantis	Pristimantis fenestratus	ZUEC-AMP 16006	39.75	24.38	3		n/a	n/a	n/a	n/a
Brachycephaloidea	Craugastoridae	Pristimantis	Pristimantis fenestratus	ZUEC-AMP 16067	39.84	23.21	3.1		n/a	n/a	n/a	n/a
Brachycephaloidea	Craugastoridae	Pristimantis	Pristimantis fenestratus	ZUEC-AMP 16104	29.17	17.94	2.69		n/a	n/a	n/a	n/a
Brachycephaloidea	Craugastoridae	Pristimantis	Pristimantis fenestratus	ZUEC-AMP 16108	28.67	17.33	2.13		n/a	n/a	n/a	n/a
Brachycephaloidea	Craugastoridae	Pristimantis	Pristimantis ferwerdai	n/a	23.66	12.76	1.18	Amezquita, Adolfo, et al. "A new species of Pristimantis (Anura: Craugastoridae) from the cloud forests of Colombian western Andes." Zootaxa 4648.3 (2019): 537-548.	n/a	n/a	No	Amezquita, Adolfo, et al. "A new species of Pristimantis (Anura: Craugastoridae) from the cloud forests of Colombian western Andes." Zootaxa 4648.3 (2019): 537-548.
Brachycephaloidea	Craugastoridae	Pristimantis	Pristimantis gagliardoi	n/a	22.17	12.7	0.76	Bustamante, Martin R., and JOSEPH R. Mendelson III. "A new frog species (Strabomantidae: Pristimantis) from the high Andes of southeastern Ecuador." Zootaxa 1820.1 (2008): 49-59.	n/a	n/a	No	Bustamante, Martin R., and JOSEPH R. Mendelson III. "A new frog species (Strabomantidae: Pristimantis) from the high Andes of southeastern Ecuador." Zootaxa 1820.1 (2008): 49-59.
Brachycephaloidea	Craugastoridae	Pristimantis	Pristimantis geminus	n/a	18.9	10.1	0.5	Kaiser, Hinrich, et al. "Five new species of Pristimantis (Anura: Strabomantidae) from the coastal cloud forest of the PenÃnsula de Paria, Venezuela." Journal of Threatened Taxa7.4 (2015): 7047-7088.	n/a	n/a	No	Kaiser, Hinrich, et al. "Five new species of Pristimantis (Anura: Strabomantidae) from the coastal cloud forest of the PenÃnsula de Paria, Venezuela." Journal of Threatened Taxa7.4 (2015): 7047-7088.
Brachycephaloidea	Craugastoridae	Pristimantis	Pristimantis ginesi	ZUEC-AMP 9353	20.4	7.62	0.7		n/a	n/a	n/a	n/a
Brachycephaloidea	Craugastoridae	Pristimantis	Pristimantis ginesi	ZUEC-AMP 9354	18.91	7.21	0.64		n/a	n/a	n/a	n/a
Brachycephaloidea	Craugastoridae	Pristimantis	Pristimantis giorgii	n/a	29.23	16.24	1.8	de Oliveira, Elciomar Araújo, et al. "Four new species of Pristimantis Jiménez de la Espada, 1870 (Anura: Craugastoridae) in the eastern Amazon." PloS one 15.3 (2020): e0229971.	3007.26	de Oliveira, Elciomar Araújo, et al. "Four new species of Pristimantis Jiménez de la Espada, 1870 (Anura: Craugastoridae) in the eastern Amazon." PloS one 15.3 (2020): e0229971.	No	de Oliveira, Elciomar Araújo, et al. "Four new species of Pristimantis Jiménez de la Espada, 1870 (Anura: Craugastoridae) in the eastern Amazon." PloS one 15.3 (2020): e0229971.
Brachycephaloidea	Craugastoridae	Pristimantis	Pristimantis gloria	n/a	21.7	n/a	2.6	Páez, Nadia B., and Santiago R. Ron. "Systematics of Huicundomantis, a new subgenus of Pristimantis (Anura, Strabomantidae) with extraordinary cryptic diversity and eleven new species." ZooKeys 868 (2019): 1.	n/a	n/a	No	Páez, Nadia B., and Santiago R. Ron. "Systematics of Huicundomantis, a new subgenus of Pristimantis (Anura, Strabomantidae) with extraordinary cryptic diversity and eleven new species." ZooKeys 868 (2019): 1.
Brachycephaloidea	Craugastoridae	Pristimantis	Pristimantis guaiquinimensis	n/a	33.4	16.4	1.2		n/a	n/a	No
Brachycephaloidea	Craugastoridae	Pristimantis	Pristimantis hampatusami	n/a	21	11.6	0.8	Yánez-Muñoz, Mario H., Juan Carlos Sánchez-Nivicela, and Carolina Reyes-Puig. "Tres nuevas especies de ranas terrestres Pristimantis (Anura: Craugastoridae) de la Provincia de El Oro, Ecuador." ACI Avances en Ciencias e Ingenierías8.1 (2016): 5-25.	n/a	n/a	No	Yánez-Muñoz, Mario H., Juan Carlos Sánchez-Nivicela, and Carolina Reyes-Puig. "Tres nuevas especies de ranas terrestres Pristimantis (Anura: Craugastoridae) de la Provincia de El Oro, Ecuador." ACI Avances en Ciencias e Ingenierías8.1 (2016): 5-25.
Brachycephaloidea	Craugastoridae	Pristimantis	Pristimantis hoogmoedi	n/a	40.7	23.2	1.6	Kaiser, Hinrich, et al. "Five new species of Pristimantis (Anura: Strabomantidae) from the coastal cloud forest of the PenÃnsula de Paria, Venezuela." Journal of Threatened Taxa7.4 (2015): 7047-7088.	n/a	n/a	YES	Kaiser, Hinrich, et al. "Five new species of Pristimantis (Anura: Strabomantidae) from the coastal cloud forest of the PenÃnsula de Paria, Venezuela." Journal of Threatened Taxa7.4 (2015): 7047-7088.
Brachycephaloidea	Craugastoridae	Pristimantis	Pristimantis huicundo	n/a	20.6	11.7	1.2	Guayasamin, Juan M., Diego Almeida-Reinoso, and Fernando Nogales-Sornosa. "Two new species of frogs (Leptodactylidae: Eleutherodactylus) from the high Andes of northern Ecuador." Herpetological Monographs 18.1 (2004): 127-141.	n/a	n/a	No	Guayasamin, Juan M., Diego Almeida-Reinoso, and Fernando Nogales-Sornosa. "Two new species of frogs (Leptodactylidae: Eleutherodactylus) from the high Andes of northern Ecuador." Herpetological Monographs 18.1 (2004): 127-141.
Brachycephaloidea	Craugastoridae	Pristimantis	Pristimantis humboldti	n/a	18.9	8.3	0.8	Lehr, E. D. G. A. R., et al. "Three new species of Pristimantis (Amphibia, Anura, Craugastoridae) from upper montane forests and high Andean grasslands of the Pui Pui Protected Forest in central Peru." Zootaxa 4299.3 (2017): 301-336.	n/a	n/a	No	Lehr, E. D. G. A. R., et al. "Three new species of Pristimantis (Amphibia, Anura, Craugastoridae) from upper montane forests and high Andean grasslands of the Pui Pui Protected Forest in central Peru." Zootaxa 4299.3 (2017): 301-336.
Brachycephaloidea	Craugastoridae	Pristimantis	Pristimantis iiap	n/a	24.2	15.4	1.7	Padial, José M., et al. "A new species of the Pristimantis conspicillatus Group from the Peruvian Amazon (Anura: Craugastoridae)." Annals of Carnegie Museum 83.3 (2016): 207-218.	3690	Padial, José M., et al. "A new species of the Pristimantis conspicillatus Group from the Peruvian Amazon (Anura: Craugastoridae)." Annals of Carnegie Museum 83.3 (2016): 207-218.	No	Padial, José M., et al. "A new species of the Pristimantis conspicillatus Group from the Peruvian Amazon (Anura: Craugastoridae)." Annals of Carnegie Museum 83.3 (2016): 207-218.
Brachycephaloidea	Craugastoridae	Pristimantis	Pristimantis inguinalis	n/a	20.23	10.34	1.1	Fouquet, A., Q. Martinez, E. A. Courtois, M. Dewynter, K. Pineau, P. Gaucher, M. Blanc, C. Marty, and P. J. R. Kok. 2013. A new species of the genus Pristimantis (Amphibia, Craugastoridae) associated with the moderately evelated massifs of French Guiana. Zootaxa 3750: 569–586.	3335	Lescure and Marty 2000	n/a	n/a
Brachycephaloidea	Craugastoridae	Pristimantis	Pristimantis ixalus	n/a	45.4	31	2.3	Lynch, John D. "New species of frogs (Eleutherodactylus: Leptodactylidae) from the Cordillera Oriental of Norte de Santander and Santander, Colombia." Revista de la Academia Colombiana de Ciencias Exactas, Físicas y Naturales 27.104 (2003): 449-461.	n/a	n/a	No	Lynch, John D. "New species of frogs (Eleutherodactylus: Leptodactylidae) from the Cordillera Oriental of Norte de Santander and Santander, Colombia." Revista de la Academia Colombiana de Ciencias Exactas, Físicas y Naturales 27.104 (2003): 449-461.
Brachycephaloidea	Craugastoridae	Pristimantis	Pristimantis jimenezi	n/a	25.5	n/a	1.4	Páez, Nadia B., and Santiago R. Ron. "Systematics of Huicundomantis, a new subgenus of Pristimantis (Anura, Strabomantidae) with extraordinary cryptic diversity and eleven new species." ZooKeys 868 (2019): 1.	2894.58	Páez, Nadia B., and Santiago R. Ron. "Systematics of Huicundomantis, a new subgenus of Pristimantis (Anura, Strabomantidae) with extraordinary cryptic diversity and eleven new species." ZooKeys 868 (2019): 1.	No	Páez, Nadia B., and Santiago R. Ron. "Systematics of Huicundomantis, a new subgenus of Pristimantis (Anura, Strabomantidae) with extraordinary cryptic diversity and eleven new species." ZooKeys 868 (2019): 1.
Brachycephaloidea	Craugastoridae	Pristimantis	Pristimantis jubatus	n/a	23.7	12.9	1.1	García-R, J. C., and JOHN D. Lynch. "A new species of frog (genus Eleutherodactylus) from a cloud forest in Western Colombia." Zootaxa 1171.1 (2006): 39-45.	n/a	n/a	No	García-R, J. C., and JOHN D. Lynch. "A new species of frog (genus Eleutherodactylus) from a cloud forest in Western Colombia." Zootaxa 1171.1 (2006): 39-45.
Brachycephaloidea	Craugastoridae	Pristimantis	Pristimantis kareliae	n/a	25.1	11.6	1.5	La Marca, Enrique. "Dos nuevas especies de ranas (Amphibia: Leptodactylidae) de páramo del Parque Nacional Sierra Nevada, Venezuela." Herpetotropicos 2.1 (2005).	n/a	n/a	No	La Marca, Enrique. "Dos nuevas especies de ranas (Amphibia: Leptodactylidae) de páramo del Parque Nacional Sierra Nevada, Venezuela." Herpetotropicos 2.1 (2005).
Brachycephaloidea	Craugastoridae	Pristimantis	Pristimantis kichwarum	n/a	20.2	12.3	0.9	Elmer, Kathryn R., and David C. Cannatella. "Three new species of leaflitter frogs from the upper Amazon forests: cryptic diversity within Pristimantis" ockendeni"(Anura: Strabomantidae) in Ecuador." Zootaxa 1784.1 (2008): 11-38.	n/a	n/a	No	Elmer, Kathryn R., and David C. Cannatella. "Three new species of leaflitter frogs from the upper Amazon forests: cryptic diversity within Pristimantis" ockendeni"(Anura: Strabomantidae) in Ecuador." Zootaxa 1784.1 (2008): 11-38.
Brachycephaloidea	Craugastoridae	Pristimantis	Pristimantis koehleri	n/a	26.6	15.1	2	Padial, Jose M., and Ignacio De la Riva. "Integrative taxonomy reveals cryptic Amazonian species of Pristimantis (Anura: Strabomantidae)." Zoological Journal of the Linnean Society155.1 (2009): 97-122.	3662.4	Padial, Jose M., and Ignacio De la Riva. "Integrative taxonomy reveals cryptic Amazonian species of Pristimantis (Anura: Strabomantidae)." Zoological Journal of the Linnean Society155.1 (2009): 97-122.	No	Padial, Jose M., and Ignacio De la Riva. "Integrative taxonomy reveals cryptic Amazonian species of Pristimantis (Anura: Strabomantidae)." Zoological Journal of the Linnean Society155.1 (2009): 97-122.
Brachycephaloidea	Craugastoridae	Pristimantis	Pristimantis kuri	n/a	26.1	14.2	1.2	Yánez-Muñoz, Mario H., Juan Carlos Sánchez-Nivicela, and Carolina Reyes-Puig. "Tres nuevas especies de ranas terrestres Pristimantis (Anura: Craugastoridae) de la Provincia de El Oro, Ecuador." ACI Avances en Ciencias e Ingenierías8.1 (2016): 5-25.	n/a	n/a	No	Yánez-Muñoz, Mario H., Juan Carlos Sánchez-Nivicela, and Carolina Reyes-Puig. "Tres nuevas especies de ranas terrestres Pristimantis (Anura: Craugastoridae) de la Provincia de El Oro, Ecuador." ACI Avances en Ciencias e Ingenierías8.1 (2016): 5-25.
Brachycephaloidea	Craugastoridae	Pristimantis	Pristimantis kuri	n/a	26.1	12.8	1.2	Reyes-Puig, Juan Pablo, et al. "Tres nuevas especies de ranas terrestres Pristimantis (Anura: Craugastoridae) de lacuenca alta del Río Pastaza, Ecuador." ACI Avances en Ciencias e Ingenierías 6.2 (2014).	n/a	n/a	No	Reyes-Puig, Juan Pablo, et al. "Tres nuevas especies de ranas terrestres Pristimantis (Anura: Craugastoridae) de lacuenca alta del Río Pastaza, Ecuador." ACI Avances en Ciencias e Ingenierías 6.2 (2014).
Brachycephaloidea	Craugastoridae	Pristimantis	Pristimantis lacrimosus	n/a	n/a	n/a	n/a		3070	Batallas, Diego, and Jorge Brito. "Nueva especie de rana del género Pristimantis del grupo lacrimosus (Amphibia: Craugastoridae) del Parque Nacional Sangay, Ecuador." Papéis Avulsos de Zoologia 54.5 (2014): 51-62.	n/a	n/a
Brachycephaloidea	Craugastoridae	Pristimantis	Pristimantis lacrimosus	ZUEC-AMP 7426	21.92	10.74	0.81		n/a	n/a	n/a	n/a
Brachycephaloidea	Craugastoridae	Pristimantis	Pristimantis lacrimosus	ZUEC-AMP 8446	22.88	11.7	1.2		n/a	n/a	n/a	n/a
Brachycephaloidea	Craugastoridae	Pristimantis	Pristimantis lacrimosus	ZUEC-AMP 8454	21.52	11.7	0.97		n/a	n/a	n/a	n/a
Brachycephaloidea	Craugastoridae	Pristimantis	Pristimantis lacrimosus	ZUEC-AMP 10619	23.95	12.33	0.95		n/a	n/a	n/a	n/a
Brachycephaloidea	Craugastoridae	Pristimantis	Pristimantis lancinii	n/a	33.8	14.9	1.8	La Marca, Enrique. "Sinopsis taxonómica de dos géneros nuevos de anfibios (Anura: Leptodactylidae) de los Andes de Venezuela." Herpetotropicos 3.2 (2007): 67-87.	n/a	n/a	No	La Marca, Enrique. "Sinopsis taxonómica de dos géneros nuevos de anfibios (Anura: Leptodactylidae) de los Andes de Venezuela." Herpetotropicos 3.2 (2007): 67-87.
Brachycephaloidea	Craugastoridae	Pristimantis	Pristimantis latericius	n/a	24.72	12.35	1.18	Batallas, Diego, and Jorge Brito. "Nueva especie de rana del género Pristimantis del grupo lacrimosus (Amphibia: Craugastoridae) del Parque Nacional Sangay, Ecuador." Papéis Avulsos de Zoologia 54.5 (2014): 51-62.	4360	Batallas, Diego, and Jorge Brito. "Nueva especie de rana del género Pristimantis del grupo lacrimosus (Amphibia: Craugastoridae) del Parque Nacional Sangay, Ecuador." Papéis Avulsos de Zoologia 54.5 (2014): 51-62.	No	Batallas, Diego, and Jorge Brito. "Nueva especie de rana del género Pristimantis del grupo lacrimosus (Amphibia: Craugastoridae) del Parque Nacional Sangay, Ecuador." Papéis Avulsos de Zoologia 54.5 (2014): 51-62.
Brachycephaloidea	Craugastoridae	Pristimantis	Pristimantis latro	n/a	20.4	16.9	0.8	De Oliveira, Elciomar Araújo, et al. "A new species of Pristimantis from eastern Brazilian Amazonia (Anura, Craugastoridae)." ZooKeys 687 (2017): 101.	3069	De Oliveira, Elciomar Araújo, et al. "A new species of Pristimantis from eastern Brazilian Amazonia (Anura, Craugastoridae)." ZooKeys 687 (2017): 101.	n/a	n/a
Brachycephaloidea	Craugastoridae	Pristimantis	Pristimantis leopardus	n/a	17.5	10.1	1	Rivera-Correa, Mauricio, Carlos Jimenez-Rivillas, and Juan M. Daza. "Phylogenetic analysis of the Neotropical Pristimantis leptolophus species group (Anura: Craugastoridae): molecular approach and description of a new polymorphic species." Zootaxa 4242.2 (2017): 313-343.	n/a	n/a	No	Rivera-Correa, Mauricio, Carlos Jimenez-Rivillas, and Juan M. Daza. "Phylogenetic analysis of the Neotropical Pristimantis leptolophus species group (Anura: Craugastoridae): molecular approach and description of a new polymorphic species." Zootaxa 4242.2 (2017): 313-343.
Brachycephaloidea	Craugastoridae	Pristimantis	Pristimantis llanganati	n/a	25	16	1	Navarrete, María J., Pablo J. Venegas, and Santiago R. Ron. "Two new species of frogs of the genus Pristimantis from Llanganates National Park in Ecuador with comments on the regional diversity of Ecuadorian Pristimantis (Anura, Craugastoridae)." ZooKeys 593 (2016): 139.	n/a	n/a	No	Navarrete, María J., Pablo J. Venegas, and Santiago R. Ron. "Two new species of frogs of the genus Pristimantis from Llanganates National Park in Ecuador with comments on the regional diversity of Ecuadorian Pristimantis (Anura, Craugastoridae)." ZooKeys 593 (2016): 139.
Brachycephaloidea	Craugastoridae	Pristimantis	Pristimantis llojsintuta	n/a	20.9	10.2	1.5	Köhler, Jörn, and Stefan Lötters. "New species of the Eleutherodactylus unistrigatus group (Amphibia: Anura: Leptodactylidae) from montane rain forest of Bolivia." Copeia(1999): 422-427.	2850	Köhler, Jörn, and Stefan Lötters. "New species of the Eleutherodactylus unistrigatus group (Amphibia: Anura: Leptodactylidae) from montane rain forest of Bolivia." Copeia(1999): 422-427.	No	Köhler, Jörn, and Stefan Lötters. "New species of the Eleutherodactylus unistrigatus group (Amphibia: Anura: Leptodactylidae) from montane rain forest of Bolivia." Copeia(1999): 422-427.
Brachycephaloidea	Craugastoridae	Pristimantis	Pristimantis longicorpus	n/a	23.3	8.7	1	Kaiser, Hinrich, et al. "Five new species of Pristimantis (Anura: Strabomantidae) from the coastal cloud forest of the PenÃnsula de Paria, Venezuela." Journal of Threatened Taxa7.4 (2015): 7047-7088.	n/a	n/a	No	Kaiser, Hinrich, et al. "Five new species of Pristimantis (Anura: Strabomantidae) from the coastal cloud forest of the PenÃnsula de Paria, Venezuela." Journal of Threatened Taxa7.4 (2015): 7047-7088.
Brachycephaloidea	Craugastoridae	Pristimantis	Pristimantis luscombei	n/a	21.4	12.4	1.2	Elmer, Kathryn R., and David C. Cannatella. "Three new species of leaflitter frogs from the upper Amazon forests: cryptic diversity within Pristimantis" ockendeni"(Anura: Strabomantidae) in Ecuador." Zootaxa 1784.1 (2008): 11-38.	n/a	n/a	No	Elmer, Kathryn R., and David C. Cannatella. "Three new species of leaflitter frogs from the upper Amazon forests: cryptic diversity within Pristimantis" ockendeni"(Anura: Strabomantidae) in Ecuador." Zootaxa 1784.1 (2008): 11-38.
Brachycephaloidea	Craugastoridae	Pristimantis	Pristimantis lutzae	n/a	24.6	n/a	1.3	Páez, Nadia B., and Santiago R. Ron. "Systematics of Huicundomantis, a new subgenus of Pristimantis (Anura, Strabomantidae) with extraordinary cryptic diversity and eleven new species." ZooKeys 868 (2019): 1.	n/a	n/a	No	Páez, Nadia B., and Santiago R. Ron. "Systematics of Huicundomantis, a new subgenus of Pristimantis (Anura, Strabomantidae) with extraordinary cryptic diversity and eleven new species." ZooKeys 868 (2019): 1.
Brachycephaloidea	Craugastoridae	Pristimantis	Pristimantis macrummendozai	n/a	21.68	7.66	1.14	Acosta-Galvis, Andrés R. "Una nueva especie del género< em> Pristimantis< em>(Anura: Craugastoridae) del complejo de páramos Merchán-Iguaque (Boyacá, Colombia)." Biota Colombiana 16.2 (2015).	n/a	n/a	No	Acosta-Galvis, Andrés R. "Una nueva especie del género< em> Pristimantis< em>(Anura: Craugastoridae) del complejo de páramos Merchán-Iguaque (Boyacá, Colombia)." Biota Colombiana 16.2 (2015).
Brachycephaloidea	Craugastoridae	Pristimantis	Pristimantis mallii	n/a	16.7	10.7	1.2	Reyes-Puig, Carolina, et al. "A new species of terrestrial frog Pristimantis (Strabomantidae) from the upper basin of the Pastaza River, Ecuador." ZooKeys 832 (2019): 113.	n/a	n/a	No	Reyes-Puig, Carolina, et al. "A new species of terrestrial frog Pristimantis (Strabomantidae) from the upper basin of the Pastaza River, Ecuador." ZooKeys 832 (2019): 113.
Brachycephaloidea	Craugastoridae	Pristimantis	Pristimantis marahuaka	n/a	22.5	12	0.9	Fuentes, Oswaldo, and César L. Barrio-Amorós. "A new Eleutherodactylus (Anura, Leptodactylidae) from Marahuaka tepui, Amazonas, Venezuela." Revista de la Academia Colombiana de Ciencias Exactas, Físicas y Naturales 28.107 (2004): 285-291.	n/a	n/a	No	Fuentes, Oswaldo, and César L. Barrio-Amorós. "A new Eleutherodactylus (Anura, Leptodactylidae) from Marahuaka tepui, Amazonas, Venezuela." Revista de la Academia Colombiana de Ciencias Exactas, Físicas y Naturales 28.107 (2004): 285-291.
Brachycephaloidea	Craugastoridae	Pristimantis	Pristimantis mariaelenae	n/a	17.9	7.5	0.9	Venegas, Pablo J., and William E. Duellman. "Two syntopic new species of the Pristimantis orestes Group (Anura: Strabomantidae) from northwestern Peru." Zootaxa 3249.1 (2012): 47-59.	n/a	n/a	No	Venegas, Pablo J., and William E. Duellman. "Two syntopic new species of the Pristimantis orestes Group (Anura: Strabomantidae) from northwestern Peru." Zootaxa 3249.1 (2012): 47-59.
Brachycephaloidea	Craugastoridae	Pristimantis	Pristimantis matidiktyo	n/a	19.6	10.4	1.1	Ortega-Andrade, H. Mauricio, and Jorge H. Valencia. "A new species of the Pristimantis frater group (Anura: Strabomantidae) from the eastern evergreen lowland forests of Ecuador." Herpetologica 68.2 (2012): 244-255.	n/a	n/a	No	Ortega-Andrade, H. Mauricio, and Jorge H. Valencia. "A new species of the Pristimantis frater group (Anura: Strabomantidae) from the eastern evergreen lowland forests of Ecuador." Herpetologica 68.2 (2012): 244-255.
Brachycephaloidea	Craugastoridae	Pristimantis	Pristimantis memorans	n/a	21.8	12.1	1.15		2620	Myers, Charles W., and Maureen A. Donnelly. "A tepui herpetofauna on a granitic mountain (Tamacuari) in the borderland between Venezuela and Brazil: report from the Phipps Tapirapecó Expedition. American Museum novitates; no. 3213." (1997).	n/a	n/a
Brachycephaloidea	Craugastoridae	Pristimantis	Pristimantis meridionalis	n/a	20.5	12.6	1.1	Lehr, Edgar, and William E. Duellman. "Two new species of Eleutherodactylus (Anura: Leptodactylidae) from the Cordillera Occidental in Peru." Copeia 2007.1 (2007): 140-149.	n/a	n/a	n/a	n/a
Brachycephaloidea	Craugastoridae	Pristimantis	Pristimantis metabates	n/a	32.2	20.1	1.9	Duellman, William E., and Jennifer B. Pramuk. "Frogs of the genus Eleutherodactylus (Anura: Leptodactylidae) in the Andes of northern Peru." (1999).	n/a	n/a	n/a	n/a
Brachycephaloidea	Craugastoridae	Pristimantis	Pristimantis miktos	n/a	19	9.7	1.1	Ortega-Andrade, H. Mauricio, and Pablo J. Venegas. "A new synonym for Pristimantis luscombei (Duellman and Mendelson 1995) and the description of a new species of Pristimantis from the upper Amazon basin (Amphibia: Craugastoridae)." Zootaxa 3895.1 (2014): 31-57.	n/a	n/a	No	Ortega-Andrade, H. Mauricio, and Pablo J. Venegas. "A new synonym for Pristimantis luscombei (Duellman and Mendelson 1995) and the description of a new species of Pristimantis from the upper Amazon basin (Amphibia: Craugastoridae)." Zootaxa 3895.1 (2014): 31-57.
Brachycephaloidea	Craugastoridae	Pristimantis	Pristimantis moa	n/a	32.9	16.7	2.1	de Oliveira, Elciomar Araújo, et al. "Four new species of Pristimantis Jiménez de la Espada, 1870 (Anura: Craugastoridae) in the eastern Amazon." PloS one 15.3 (2020): e0229971.	3117.71	de Oliveira, Elciomar Araújo, et al. "Four new species of Pristimantis Jiménez de la Espada, 1870 (Anura: Craugastoridae) in the eastern Amazon." PloS one 15.3 (2020): e0229971.	No	de Oliveira, Elciomar Araújo, et al. "Four new species of Pristimantis Jiménez de la Espada, 1870 (Anura: Craugastoridae) in the eastern Amazon." PloS one 15.3 (2020): e0229971.
Brachycephaloidea	Craugastoridae	Pristimantis	Pristimantis multicolor	n/a	26.2	n/a	1.5	Páez, Nadia B., and Santiago R. Ron. "Systematics of Huicundomantis, a new subgenus of Pristimantis (Anura, Strabomantidae) with extraordinary cryptic diversity and eleven new species." ZooKeys 868 (2019): 1.	n/a	n/a	No	Páez, Nadia B., and Santiago R. Ron. "Systematics of Huicundomantis, a new subgenus of Pristimantis (Anura, Strabomantidae) with extraordinary cryptic diversity and eleven new species." ZooKeys 868 (2019): 1.
Brachycephaloidea	Craugastoridae	Pristimantis	Pristimantis muranunka	n/a	16.8	8	0.7	RON, SANTIAGO R. "Nueva especie de rana bromelícola del género Pristimantis (Amphibia: Craugastoridae), meseta de la cordillera del Cóndor, Ecuador." Papéis Avulsos de Zoologia57.15 (2017): 177-195.	6460	RON, SANTIAGO R. "Nueva especie de rana bromelícola del género Pristimantis (Amphibia: Craugastoridae), meseta de la cordillera del Cóndor, Ecuador." Papéis Avulsos de Zoologia57.15 (2017): 177-195.	No	RON, SANTIAGO R. "Nueva especie de rana bromelícola del género Pristimantis (Amphibia: Craugastoridae), meseta de la cordillera del Cóndor, Ecuador." Papéis Avulsos de Zoologia57.15 (2017): 177-195.
Brachycephaloidea	Craugastoridae	Pristimantis	Pristimantis mutabilis	n/a	17.2	8.2	0.9	Guayasamin, Juan M., et al. "Phenotypic plasticity raises questions for taxonomically important traits: a remarkable new Andean rainfrog (Pristimantis) with the ability to change skin texture." Zoological Journal of the Linnean Society 173.4 (2015): 913-928.	3285	Guayasamin, Juan M., et al. "Phenotypic plasticity raises questions for taxonomically important traits: a remarkable new Andean rainfrog (Pristimantis) with the ability to change skin texture." Zoological Journal of the Linnean Society 173.4 (2015): 913-928.	No	Guayasamin, Juan M., et al. "Phenotypic plasticity raises questions for taxonomically important traits: a remarkable new Andean rainfrog (Pristimantis) with the ability to change skin texture." Zoological Journal of the Linnean Society 173.4 (2015): 913-928.
Brachycephaloidea	Craugastoridae	Pristimantis	Pristimantis nangaritza	n/a	18.8	n/a	1	Páez, Nadia B., and Santiago R. Ron. "Systematics of Huicundomantis, a new subgenus of Pristimantis (Anura, Strabomantidae) with extraordinary cryptic diversity and eleven new species." ZooKeys 868 (2019): 1.	n/a	n/a	No	Páez, Nadia B., and Santiago R. Ron. "Systematics of Huicundomantis, a new subgenus of Pristimantis (Anura, Strabomantidae) with extraordinary cryptic diversity and eleven new species." ZooKeys 868 (2019): 1.
Brachycephaloidea	Craugastoridae	Pristimantis	Pristimantis nankints	n/a	19.6	10.4	1.8	Ron, Santiago R., et al. "Three new species of frogs of the genus Pristimantis (Anura, Strabomantidae) with a redefinition of the P. lacrimosus species group." ZooKeys 993 (2020): 121.	n/a	n/a	YES	Ron, Santiago R., et al. "Three new species of frogs of the genus Pristimantis (Anura, Strabomantidae) with a redefinition of the P. lacrimosus species group." ZooKeys 993 (2020): 121.
Brachycephaloidea	Craugastoridae	Pristimantis	Pristimantis nelsongalloi	n/a	14.8	8	1.5	Valencia, Jorge H., et al. "A new species of terrestrial-breeding frog of the genus Pristimantis (Anura: Terrarana: Craugastoridae) from the eastern Andean slopes of the southern Ecuador." Zootaxa 4658.3 (2019): zootaxa-4658.	12389.9	Valencia, J. H., et al. 2019. A new species of terrestrial-breeding frog of the genus Pristimantis (Anura: Terrarana: Craugastoridae) from the eastern Andean slopes of the southern Ecuador. Zootaxa 4658 (3): 509–525.	No	Valencia, Jorge H., et al. "A new species of terrestrial-breeding frog of the genus Pristimantis (Anura: Terrarana: Craugastoridae) from the eastern Andean slopes of the southern Ecuador." Zootaxa 4658.3 (2019): zootaxa-4658.
Brachycephaloidea	Craugastoridae	Pristimantis	Pristimantis nietoi	n/a	15.9	8.6	0.9	Arteaga, Alejandro, et al. "Comparative phylogeography reveals cryptic diversity and repeated patterns of cladogenesis for amphibians and reptiles in northwestern Ecuador." PloS one 11.4 (2016): e0151746.	n/a	n/a	No	Arteaga, Alejandro, et al. "Comparative phylogeography reveals cryptic diversity and repeated patterns of cladogenesis for amphibians and reptiles in northwestern Ecuador." PloS one 11.4 (2016): e0151746.
Brachycephaloidea	Craugastoridae	Pristimantis	Pristimantis nimbus	n/a	23.9	12.9	7.3	Urgiles, Veronica L., et al. "A new terrestrial frog (Anura: Craugastoridae) from the montane cloud forests of the southeastern Ecuadorian Andes." Zootaxa 4318.3 (2017): 520-530.	n/a	n/a	No	Urgiles, Veronica L., et al. "A new terrestrial frog (Anura: Craugastoridae) from the montane cloud forests of the southeastern Ecuadorian Andes." Zootaxa 4318.3 (2017): 520-530.
Brachycephaloidea	Craugastoridae	Pristimantis	Pristimantis nubisilva	n/a	19.5	9.8	1	Kaiser, Hinrich, et al. "Five new species of Pristimantis (Anura: Strabomantidae) from the coastal cloud forest of the PenÃnsula de Paria, Venezuela." Journal of Threatened Taxa7.4 (2015): 7047-7088.	n/a	n/a	No	Kaiser, Hinrich, et al. "Five new species of Pristimantis (Anura: Strabomantidae) from the coastal cloud forest of the PenÃnsula de Paria, Venezuela." Journal of Threatened Taxa7.4 (2015): 7047-7088.
Brachycephaloidea	Craugastoridae	Pristimantis	Pristimantis ockendeni	ZUEC-AMP 18793	30.83	16.81	1.29		3856	Lima et al. 2005	n/a	n/a
Brachycephaloidea	Craugastoridae	Pristimantis	Pristimantis olivaceus	n/a	19.2	9.5	0.9	Köhler, Jörn, et al. "A new green species of frog, genus Eleutherodactylus, from Bolivia and Peru (Amphibia, Anura, Leptodactylidae)." Studies on Neotropical Fauna and Environment 33.2 (1998): 93-99.	4880	Köhler, Jörn, et al. "A new green species of frog, genus Eleutherodactylus, from Bolivia and Peru (Amphibia, Anura, Leptodactylidae)." Studies on Neotropical Fauna and Environment 33.2 (1998): 93-99.	No	Köhler, Jörn, et al. "A new green species of frog, genus Eleutherodactylus, from Bolivia and Peru (Amphibia, Anura, Leptodactylidae)." Studies on Neotropical Fauna and Environment 33.2 (1998): 93-99.
Brachycephaloidea	Craugastoridae	Pristimantis	Pristimantis omeviridis	n/a	20.8	10.5	1	Ortega-Andrade, H. Mauricio, et al. "Insights from integrative systematics reveal cryptic diversity in Pristimantis frogs (Anura: Craugastoridae) from the Upper Amazon Basin." PloS one 10.11 (2015): e0143392.	n/a	n/a	No	Ortega-Andrade, H. Mauricio, et al. "Insights from integrative systematics reveal cryptic diversity in Pristimantis frogs (Anura: Craugastoridae) from the Upper Amazon Basin." PloS one 10.11 (2015): e0143392.
Brachycephaloidea	Craugastoridae	Pristimantis	Pristimantis orcus	n/a	25.1	12.6	1.5	Lehr, Edgar, Alessandro Catenazzi, and Daniel Rodriguez. "A new species of Pristimantis (Anura: Strabomantidae) from the Amazonian lowlands of northern Peru (Region Loreto and San Martín)." Zootaxa 1990.1 (2009): 30-40.	n/a	n/a	n/a	n/a
Brachycephaloidea	Craugastoridae	Pristimantis	Pristimantis orestes	n/a	20	9	0.9	Urgiles, Veronica L., et al. "Genetic delimitation of Pristimantisorestes (Lynch, 1979) and P. saturninoi Brito et al., 2017 and description of two new terrestrial frogs from the Pristimantisorestes species group (Anura, Strabomantidae)." ZooKeys 864 (2019): 111.	2773.5	Urgiles, Veronica L., et al. "Genetic delimitation of Pristimantisorestes (Lynch, 1979) and P. saturninoi Brito et al., 2017 and description of two new terrestrial frogs from the Pristimantisorestes species group (Anura, Strabomantidae)." ZooKeys 864 (2019): 111.	No	Urgiles, Veronica L., et al. "Genetic delimitation of Pristimantisorestes (Lynch, 1979) and P. saturninoi Brito et al., 2017 and description of two new terrestrial frogs from the Pristimantisorestes species group (Anura, Strabomantidae)." ZooKeys 864 (2019): 111.
Brachycephaloidea	Craugastoridae	Pristimantis	Pristimantis ornatus	n/a	20.5	12.2	1	Lehr, Edgar, et al. "New species of Eleutherodactylus (Anura: Leptodactylidae) from the eastern Andes of central Peru with comments on central Peruvian Eleutherodactylus." Herpetological Monographs 20.1 (2006): 105-128.	n/a	n/a	No	Lehr, Edgar, et al. "New species of Eleutherodactylus (Anura: Leptodactylidae) from the eastern Andes of central Peru with comments on central Peruvian Eleutherodactylus." Herpetological Monographs 20.1 (2006): 105-128.
Brachycephaloidea	Craugastoridae	Pristimantis	Pristimantis padrecarlosi	n/a	23.6	12.7	1.2	Mueses-Cisneros, Jonh Jairo. "A new species of Eleutherodactylus (Amphibia: Anura: Brachycephalidae) from the western flank of the Cordillera Oriental of Colombia." Zootaxa 1271.1 (2006): 29-35.	n/a	n/a	No	Mueses-Cisneros, Jonh Jairo. "A new species of Eleutherodactylus (Amphibia: Anura: Brachycephalidae) from the western flank of the Cordillera Oriental of Colombia." Zootaxa 1271.1 (2006): 29-35.
Brachycephaloidea	Craugastoridae	Pristimantis	Pristimantis pahuma	n/a	21.4	11.3	1	Hutter, Carl R., and Juan M. Guayasamin. "Cryptic diversity concealed in the Andean cloud forests: two new species of rainfrogs (Pristimantis) uncovered by molecular and bioacoustic data." Neotropical Biodiversity 1.1 (2015): 36-59.	3091	Hutter, Carl R., and Juan M. Guayasamin. "Cryptic diversity concealed in the Andean cloud forests: two new species of rainfrogs (Pristimantis) uncovered by molecular and bioacoustic data." Neotropical Biodiversity 1.1 (2015): 36-59.	No	Hutter, Carl R., and Juan M. Guayasamin. "Cryptic diversity concealed in the Andean cloud forests: two new species of rainfrogs (Pristimantis) uncovered by molecular and bioacoustic data." Neotropical Biodiversity 1.1 (2015): 36-59.
Brachycephaloidea	Craugastoridae	Pristimantis	Pristimantis pardalinus	n/a	26.7	13.4	1	Lehr, Edgar, et al. "New species of Eleutherodactylus (Anura: Leptodactylidae) from the eastern Andes of central Peru with comments on central Peruvian Eleutherodactylus." Herpetological Monographs 20.1 (2006): 105-128.	n/a	n/a	No	Lehr, Edgar, et al. "New species of Eleutherodactylus (Anura: Leptodactylidae) from the eastern Andes of central Peru with comments on central Peruvian Eleutherodactylus." Herpetological Monographs 20.1 (2006): 105-128.
Brachycephaloidea	Craugastoridae	Pristimantis	Pristimantis pariagnomus	n/a	13	6.9	1.4	Kaiser, Hinrich, et al. "Five new species of Pristimantis (Anura: Strabomantidae) from the coastal cloud forest of the PenÃnsula de Paria, Venezuela." Journal of Threatened Taxa7.4 (2015): 7047-7088.	n/a	n/a	No	Kaiser, Hinrich, et al. "Five new species of Pristimantis (Anura: Strabomantidae) from the coastal cloud forest of the PenÃnsula de Paria, Venezuela." Journal of Threatened Taxa7.4 (2015): 7047-7088.
Brachycephaloidea	Craugastoridae	Pristimantis	Pristimantis paulodutrai	ZUEC-AMP 8655	24.32	13.5	1.84		n/a	n/a	n/a	n/a
Brachycephaloidea	Craugastoridae	Pristimantis	Pristimantis paulodutrai	ZUEC-AMP 16648	22.84	12.6	2.9		n/a	n/a	n/a	n/a
Brachycephaloidea	Craugastoridae	Pristimantis	Pristimantis paulodutrai	ZUEC-AMP 23786	28.7	15.74	2.22		n/a	n/a	n/a	n/a
Brachycephaloidea	Craugastoridae	Pristimantis	Pristimantis paulodutrai	ZUEC-AMP 23791	28.94	16.68	2.2		n/a	n/a	n/a	n/a
Brachycephaloidea	Craugastoridae	Pristimantis	Pristimantis peruvianus	ZUEC-AMP 10630	29.7	17.24	1.43		1450	Duellman 2005	n/a	n/a
Brachycephaloidea	Craugastoridae	Pristimantis	Pristimantis peruvianus	ZUEC-AMP 11206	21.98	12.95	1.26		n/a	n/a	n/a	n/a
Brachycephaloidea	Craugastoridae	Pristimantis	Pristimantis phoxocephalus	n/a	24.7	n/a	1.2	Páez, Nadia B., and Santiago R. Ron. "Systematics of Huicundomantis, a new subgenus of Pristimantis (Anura, Strabomantidae) with extraordinary cryptic diversity and eleven new species." ZooKeys 868 (2019): 1.	2578.12	Páez, Nadia B., and Santiago R. Ron. "Systematics of Huicundomantis, a new subgenus of Pristimantis (Anura, Strabomantidae) with extraordinary cryptic diversity and eleven new species." ZooKeys 868 (2019): 1.	No	Páez, Nadia B., and Santiago R. Ron. "Systematics of Huicundomantis, a new subgenus of Pristimantis (Anura, Strabomantidae) with extraordinary cryptic diversity and eleven new species." ZooKeys 868 (2019): 1.
Brachycephaloidea	Craugastoridae	Pristimantis	Pristimantis pictus	n/a	30.4	16	1.7	de Oliveira, Elciomar Araújo, et al. "Four new species of Pristimantis Jiménez de la Espada, 1870 (Anura: Craugastoridae) in the eastern Amazon." PloS one 15.3 (2020): e0229971.	2888.66	De Oliveira, Elciomar Araújo, et al. "A new species of Pristimantis from eastern Brazilian Amazonia (Anura, Craugastoridae)." ZooKeys 687 (2017): 101.	No	de Oliveira, Elciomar Araújo, et al. "Four new species of Pristimantis Jiménez de la Espada, 1870 (Anura: Craugastoridae) in the eastern Amazon." PloS one 15.3 (2020): e0229971.
Brachycephaloidea	Craugastoridae	Pristimantis	Pristimantis pinchaque	n/a	17.4	9.8	1.1	Reyes-Puig, Juan Pablo, et al. "Dos nuevas especies de ranas Pristimantis (Craugastoridae) de la cordillera de los Sacha Llanganatis, vertiente oriental de los Andes de Ecuador." ACI Avances en Ciencias e Ingenierías 7.2 (2015).	n/a	n/a	n/a	n/a
Brachycephaloidea	Craugastoridae	Pristimantis	Pristimantis pluvialis	n/a	24.6	12.9	3	Shepack, Alexander, et al. "A new species of Pristimantis (Amphibia, Anura, Craugastoridae) from the foothills of the Andes in Manu National Park, southeastern Peru." ZooKeys594 (2016): 143.	2407	Shepack, Alexander, et al. "A new species of Pristimantis (Amphibia, Anura, Craugastoridae) from the foothills of the Andes in Manu National Park, southeastern Peru." ZooKeys594 (2016): 143.	No	Shepack, Alexander, et al. "A new species of Pristimantis (Amphibia, Anura, Craugastoridae) from the foothills of the Andes in Manu National Park, southeastern Peru." ZooKeys594 (2016): 143.
Brachycephaloidea	Craugastoridae	Pristimantis	Pristimantis pluvian	n/a	32.5	15.7	1.5	de Oliveira, Elciomar Araújo, et al. "Four new species of Pristimantis Jiménez de la Espada, 1870 (Anura: Craugastoridae) in the eastern Amazon." PloS one 15.3 (2020): e0229971.	3645.42	de Oliveira, Elciomar Araújo, et al. "Four new species of Pristimantis Jiménez de la Espada, 1870 (Anura: Craugastoridae) in the eastern Amazon." PloS one 15.3 (2020): e0229971.	No	de Oliveira, Elciomar Araújo, et al. "Four new species of Pristimantis Jiménez de la Espada, 1870 (Anura: Craugastoridae) in the eastern Amazon." PloS one 15.3 (2020): e0229971.
Brachycephaloidea	Craugastoridae	Pristimantis	Pristimantis pulchridormientes	n/a	21.9	10.8	0.5	Chávez, Germán, and Alessandro Catenazzi. "A new species of frog of the genus Pristimantis from Tingo María National Park, Huánuco Department, central Peru (Anura, Craugastoridae)." ZooKeys 610 (2016): 113.	2763	Chávez, Germán, and Alessandro Catenazzi. "A new species of frog of the genus Pristimantis from Tingo María National Park, Huánuco Department, central Peru (Anura, Craugastoridae)." ZooKeys 610 (2016): 113.	No	Chávez, Germán, and Alessandro Catenazzi. "A new species of frog of the genus Pristimantis from Tingo María National Park, Huánuco Department, central Peru (Anura, Craugastoridae)." ZooKeys 610 (2016): 113.
Brachycephaloidea	Craugastoridae	Pristimantis	Pristimantis quicato	n/a	26.4	16.1	1.2	OSPINA-SARRIA, JHON JAIRO, et al. "A new species of Pristimantis (Amphibia: Craugastoridae) with cranial crests from the Colombian Andes." Zootaxa 3111.1 (2011): 37-48.	n/a	n/a	No	OSPINA-SARRIA, JHON JAIRO, et al. "A new species of Pristimantis (Amphibia: Craugastoridae) with cranial crests from the Colombian Andes." Zootaxa 3111.1 (2011): 37-48.
Brachycephaloidea	Craugastoridae	Pristimantis	Pristimantis quintanai	n/a	15.5	7	0.8	Urgiles, Veronica L., et al. "Genetic delimitation of Pristimantisorestes (Lynch, 1979) and P. saturninoi Brito et al., 2017 and description of two new terrestrial frogs from the Pristimantisorestes species group (Anura, Strabomantidae)." ZooKeys 864 (2019): 111.	n/a	n/a	No	Urgiles, Veronica L., et al. "Genetic delimitation of Pristimantisorestes (Lynch, 1979) and P. saturninoi Brito et al., 2017 and description of two new terrestrial frogs from the Pristimantisorestes species group (Anura, Strabomantidae)." ZooKeys 864 (2019): 111.
Brachycephaloidea	Craugastoridae	Pristimantis	Pristimantis ramagii	ZUEC-AMP 3547	19.55	11.57	1.67		n/a	n/a	n/a	n/a
Brachycephaloidea	Craugastoridae	Pristimantis	Pristimantis ramagii	ZUEC-AMP 3548	22.59	12.31	2.28		n/a	n/a	n/a	n/a
Brachycephaloidea	Craugastoridae	Pristimantis	Pristimantis ramagii	ZUEC-AMP 3552	23.69	11.8	1.97		n/a	n/a	n/a	n/a
Brachycephaloidea	Craugastoridae	Pristimantis	Pristimantis ramagii	ZUEC-AMP 3553	19.44	11.66	1.55		n/a	n/a	n/a	n/a
Brachycephaloidea	Craugastoridae	Pristimantis	Pristimantis reichlei	n/a	26.8	16.4	1.8	Padial, Jose M., and Ignacio De la Riva. "Integrative taxonomy reveals cryptic Amazonian species of Pristimantis (Anura: Strabomantidae)." Zoological Journal of the Linnean Society155.1 (2009): 97-122.	2501	Padial, Jose M., and Ignacio De la Riva. "Integrative taxonomy reveals cryptic Amazonian species of Pristimantis (Anura: Strabomantidae)." Zoological Journal of the Linnean Society155.1 (2009): 97-122.	No	Padial, Jose M., and Ignacio De la Riva. "Integrative taxonomy reveals cryptic Amazonian species of Pristimantis (Anura: Strabomantidae)." Zoological Journal of the Linnean Society155.1 (2009): 97-122.
Brachycephaloidea	Craugastoridae	Pristimantis	Pristimantis rhodostichus	n/a	19.3	10.4	1	Duellman, William E., and Jennifer B. Pramuk. "Frogs of the genus Eleutherodactylus (Anura: Leptodactylidae) in the Andes of northern Peru." (1999).	n/a	n/a	No	Duellman, William E., and Jennifer B. Pramuk. "Frogs of the genus Eleutherodactylus (Anura: Leptodactylidae) in the Andes of northern Peru." (1999).
Brachycephaloidea	Craugastoridae	Pristimantis	Pristimantis ridens	ZUEC-AMP 18764	19.48	10.75	0.61		5600	Savage 2002	n/a	n/a
Brachycephaloidea	Craugastoridae	Pristimantis	Pristimantis romeroae	n/a	23.8	9.9	2.3	Ron, Santiago R., et al. "Three new species of frogs of the genus Pristimantis (Anura, Strabomantidae) with a redefinition of the P. lacrimosus species group." ZooKeys 993 (2020): 121.	n/a	n/a	No	Ron, Santiago R., et al. "Three new species of frogs of the genus Pristimantis (Anura, Strabomantidae) with a redefinition of the P. lacrimosus species group." ZooKeys 993 (2020): 121.
Brachycephaloidea	Craugastoridae	Pristimantis	Pristimantis saltissimus	n/a	22.5	n/a	1.1	Means, D. Bruce, and Jay M. Savage. "Three new malodorous rainfrogs of the genus Pristimantis (Anura: Brachycephalidae) from the Wokomung Massif in west-central Guyana, South America." Zootaxa 1658.1 (2007): 39-55.	n/a	n/a	No	Means, D. Bruce, and Jay M. Savage. "Three new malodorous rainfrogs of the genus Pristimantis (Anura: Brachycephalidae) from the Wokomung Massif in west-central Guyana, South America." Zootaxa 1658.1 (2007): 39-55.
Brachycephaloidea	Craugastoridae	Pristimantis	Pristimantis samaipatae	n/a	32.8	19.1	1.6	Padial, Jose M., and Ignacio De la Riva. "Integrative taxonomy reveals cryptic Amazonian species of Pristimantis (Anura: Strabomantidae)." Zoological Journal of the Linnean Society155.1 (2009): 97-122.	3326.7	Padial, Jose M., and Ignacio De la Riva. "Integrative taxonomy reveals cryptic Amazonian species of Pristimantis (Anura: Strabomantidae)." Zoological Journal of the Linnean Society155.1 (2009): 97-122.	n/a	n/a
Brachycephaloidea	Craugastoridae	Pristimantis	Pristimantis sarisarinama	n/a	25.5	13.2	1	Barrio-Amoros, Cesar, and Charles Brewer-Carias. Herpetological results of the 2002 expedition to Sarisariñama, a tepui in Venezuelan Guayana, with the description of five new species. Magnolia Press, 2008.	n/a	n/a	n/a	n/a
Brachycephaloidea	Craugastoridae	Pristimantis	Pristimantis serendipitus	n/a	20.4	11.3	1.1	Duellman, William E., and Jennifer B. Pramuk. "Frogs of the genus Eleutherodactylus (Anura: Leptodactylidae) in the Andes of northern Peru." (1999).	n/a	n/a	n/a	n/a
Brachycephaloidea	Craugastoridae	Pristimantis	Pristimantis skydmainos	ZUEC-AMP 10627	21.62	15.1	1.32		n/a	n/a	n/a	n/a
Brachycephaloidea	Craugastoridae	Pristimantis	Pristimantis sneiderni	n/a	22	10.7	0.6	Ospina-Sarria, Jhon Jairo, and William E. Duellman. "Two new species of Pristimantis (Amphibia: Anura: Strabomantidae) from southwestern Colombia." Herpetologica 75.1 (2019): 85-95.	n/a	n/a	No	Ospina-Sarria, Jhon Jairo, and William E. Duellman. "Two new species of Pristimantis (Amphibia: Anura: Strabomantidae) from southwestern Colombia." Herpetologica 75.1 (2019): 85-95.
Brachycephaloidea	Craugastoridae	Pristimantis	Pristimantis spectabilis	n/a	22.7	11.5	1.5	Duellman, William E., and Juan Carlos Chaparro. "Two distinctive new species of Pristimantis (Anura: Strabomantidae) from the Cordillera Oriental with a distributional synopsis of strabomantids in Central Peru." Zootaxa 1918.1 (2008): 12-25.	n/a	n/a	No	Duellman, William E., and Juan Carlos Chaparro. "Two distinctive new species of Pristimantis (Anura: Strabomantidae) from the Cordillera Oriental with a distributional synopsis of strabomantids in Central Peru." Zootaxa 1918.1 (2008): 12-25.
Brachycephaloidea	Craugastoridae	Pristimantis	Pristimantis stictoboubonus	n/a	20	8.7	1	Duellman, William E., Edgar Lehr, and Pablo J. Venegas. "Two new species of Eleutherodactylus (Anura: Leptodactylidae) from the Andes of northern Peru." Zootaxa 1285.1 (2006): 51-64.	n/a	n/a	No	Duellman, William E., Edgar Lehr, and Pablo J. Venegas. "Two new species of Eleutherodactylus (Anura: Leptodactylidae) from the Andes of northern Peru." Zootaxa 1285.1 (2006): 51-64.
Brachycephaloidea	Craugastoridae	Pristimantis	Pristimantis stipa	n/a	18.8	7.5	0.6	Venegas, Pablo J., and William E. Duellman. "Two syntopic new species of the Pristimantis orestes Group (Anura: Strabomantidae) from northwestern Peru." Zootaxa 3249.1 (2012): 47-59.	n/a	n/a	No	Venegas, Pablo J., and William E. Duellman. "Two syntopic new species of the Pristimantis orestes Group (Anura: Strabomantidae) from northwestern Peru." Zootaxa 3249.1 (2012): 47-59.
Brachycephaloidea	Craugastoridae	Pristimantis	Pristimantis telefericus	n/a	25.7	13.7	9.6	La Marca, Enrique. "Dos nuevas especies de ranas (Amphibia: Leptodactylidae) de páramo del Parque Nacional Sierra Nevada, Venezuela." Herpetotropicos 2.1 (2005).	n/a	n/a	No	La Marca, Enrique. "Dos nuevas especies de ranas (Amphibia: Leptodactylidae) de páramo del Parque Nacional Sierra Nevada, Venezuela." Herpetotropicos 2.1 (2005).
Brachycephaloidea	Craugastoridae	Pristimantis	Pristimantis teslai	n/a	25.2	n/a	1.3	Páez, Nadia B., and Santiago R. Ron. "Systematics of Huicundomantis, a new subgenus of Pristimantis (Anura, Strabomantidae) with extraordinary cryptic diversity and eleven new species." ZooKeys 868 (2019): 1.	n/a	n/a	No	Páez, Nadia B., and Santiago R. Ron. "Systematics of Huicundomantis, a new subgenus of Pristimantis (Anura, Strabomantidae) with extraordinary cryptic diversity and eleven new species." ZooKeys 868 (2019): 1.
Brachycephaloidea	Craugastoridae	Pristimantis	Pristimantis tinajillas	n/a	13.31	6.84	0.67		n/a	n/a	No
Brachycephaloidea	Craugastoridae	Pristimantis	Pristimantis tinguichaca	n/a	23.4	n/a	1.3	Páez, Nadia B., and Santiago R. Ron. "Systematics of Huicundomantis, a new subgenus of Pristimantis (Anura, Strabomantidae) with extraordinary cryptic diversity and eleven new species." ZooKeys 868 (2019): 1.	n/a	n/a	n/a	n/a
Brachycephaloidea	Craugastoridae	Pristimantis	Pristimantis torresi	n/a	25.9	n/a	1.3	Páez, Nadia B., and Santiago R. Ron. "Systematics of Huicundomantis, a new subgenus of Pristimantis (Anura, Strabomantidae) with extraordinary cryptic diversity and eleven new species." ZooKeys 868 (2019): 1.	n/a	n/a	No	Páez, Nadia B., and Santiago R. Ron. "Systematics of Huicundomantis, a new subgenus of Pristimantis (Anura, Strabomantidae) with extraordinary cryptic diversity and eleven new species." ZooKeys 868 (2019): 1.
Brachycephaloidea	Craugastoridae	Pristimantis	Pristimantis totoroi	n/a	26.8	n/a	1.3	Páez, Nadia B., and Santiago R. Ron. "Systematics of Huicundomantis, a new subgenus of Pristimantis (Anura, Strabomantidae) with extraordinary cryptic diversity and eleven new species." ZooKeys 868 (2019): 1.	2569.65	Páez, Nadia B., and Santiago R. Ron. "Systematics of Huicundomantis, a new subgenus of Pristimantis (Anura, Strabomantidae) with extraordinary cryptic diversity and eleven new species." ZooKeys 868 (2019): 1.	No	Páez, Nadia B., and Santiago R. Ron. "Systematics of Huicundomantis, a new subgenus of Pristimantis (Anura, Strabomantidae) with extraordinary cryptic diversity and eleven new species." ZooKeys 868 (2019): 1.
Brachycephaloidea	Craugastoridae	Pristimantis	Pristimantis turik	n/a	29	15.6	0.9	Barrio-Amorós, CÉSAR L., FERNANDO JM Rojas-Runjaic, and E. E. Infante-Rivero. "Tres nuevos Pristimantis (Anura: Strabomantidae) de la sierra de Perijá, estado Zulia, Venezuela." Revista Española de Herpetología 21 (2007): 71-94.	n/a	n/a	n/a	n/a
Brachycephaloidea	Craugastoridae	Pristimantis	Pristimantis verrucolatus	n/a	29.4	n/a	1.5	Páez, Nadia B., and Santiago R. Ron. "Systematics of Huicundomantis, a new subgenus of Pristimantis (Anura, Strabomantidae) with extraordinary cryptic diversity and eleven new species." ZooKeys 868 (2019): 1.	2114.08	Páez, Nadia B., and Santiago R. Ron. "Systematics of Huicundomantis, a new subgenus of Pristimantis (Anura, Strabomantidae) with extraordinary cryptic diversity and eleven new species." ZooKeys 868 (2019): 1.	No	Páez, Nadia B., and Santiago R. Ron. "Systematics of Huicundomantis, a new subgenus of Pristimantis (Anura, Strabomantidae) with extraordinary cryptic diversity and eleven new species." ZooKeys 868 (2019): 1.
Brachycephaloidea	Craugastoridae	Pristimantis	Pristimantis versicolor	n/a	20.5	n/a	1.3	Páez, Nadia B., and Santiago R. Ron. "Systematics of Huicundomantis, a new subgenus of Pristimantis (Anura, Strabomantidae) with extraordinary cryptic diversity and eleven new species." ZooKeys 868 (2019): 1.	n/a	n/a	n/a	n/a
Brachycephaloidea	Craugastoridae	Pristimantis	Pristimantis vidua	n/a	17.6	7.5	0.9	Székely, Paul, et al. "Fifty years after: A taxonomic revision of the amphibian species from the Ecuadorian biodiversity hotspot Abra de Zamora, with description of two new Pristimantis species." PloS one 15.9 (2020): e0238306.	3302.2	Székely, Paul, et al. "Fifty years after: A taxonomic revision of the amphibian species from the Ecuadorian biodiversity hotspot Abra de Zamora, with description of two new Pristimantis species." PloS one 15.9 (2020): e0238306.	n/a	n/a
Brachycephaloidea	Craugastoridae	Pristimantis	Pristimantis vilarsi	n/a	n/a	n/a	n/a		4121.5	Heyer, W. Ronald, and César Luis Barrio-Amorós. "The advertisement calls of two sympatric frogs, Leptodactylus lithonaetes (Amphibia: Anura: Leptodactylidae) and Pristimantis vilarsi (Amphibia: Anura: Strabomantidae)." Proceedings of the Biological Society of Washington 122.3 (2009): 282-291.	n/a	n/a
Brachycephaloidea	Craugastoridae	Pristimantis	Pristimantis vilarsi	n/a	26.76	13.56	1.96	Barrio-Amoros, Cesar L., and Cesar R. Molina. "A new Eleutherodactylus (Anura, Brachycephalidae) from the Venezuelan Guayana, and redescription of Eleutherodactylus vilarsi (Melin)." Zootaxa 1302.1 (2006): 1-20.	n/a	n/a	No	Barrio-Amoros, Cesar L., and Cesar R. Molina. "A new Eleutherodactylus (Anura, Brachycephalidae) from the Venezuelan Guayana, and redescription of Eleutherodactylus vilarsi (Melin)." Zootaxa 1302.1 (2006): 1-20.
Brachycephaloidea	Craugastoridae	Pristimantis	Pristimantis vinhai	ZUEC-AMP 16640	24.32	14.03	1.58		n/a	n/a	n/a	n/a
Brachycephaloidea	Craugastoridae	Pristimantis	Pristimantis xeniolum	n/a	17.6	6.9	1	Lynch, John D. "A small amphibian fauna from a previously unexplored páramo of the Cordillera Occidental in western Colombia." Journal of Herpetology (2001): 226-231.	n/a	n/a	n/a	n/a
Brachycephaloidea	Craugastoridae	Pristimantis	Pristimantis yanezi	n/a	27.1	15.6	1.1	Navarrete, María J., Pablo J. Venegas, and Santiago R. Ron. "Two new species of frogs of the genus Pristimantis from Llanganates National Park in Ecuador with comments on the regional diversity of Ecuadorian Pristimantis (Anura, Craugastoridae)." ZooKeys 593 (2016): 139.	n/a	n/a	No	Navarrete, María J., Pablo J. Venegas, and Santiago R. Ron. "Two new species of frogs of the genus Pristimantis from Llanganates National Park in Ecuador with comments on the regional diversity of Ecuadorian Pristimantis (Anura, Craugastoridae)." ZooKeys 593 (2016): 139.
Brachycephaloidea	Craugastoridae	Pristimantis	Pristimantis yukpa	n/a	20.8	12.2	1.5	Barrio-Amorós, CÉSAR L., FERNANDO JM Rojas-Runjaic, and E. E. Infante-Rivero. "Tres nuevos Pristimantis (Anura: Strabomantidae) de la sierra de Perijá, estado Zulia, Venezuela." Revista Española de Herpetología 21 (2007): 71-94.	n/a	n/a	No	Barrio-Amorós, CÉSAR L., FERNANDO JM Rojas-Runjaic, and E. E. Infante-Rivero. "Tres nuevos Pristimantis (Anura: Strabomantidae) de la sierra de Perijá, estado Zulia, Venezuela." Revista Española de Herpetología 21 (2007): 71-94.
Brachycephaloidea	Craugastoridae	Psycophrynella	Psychrophrynella vilcabambensis	n/a	16.05	7.33	0.89	Condori, F. P., A. A. Acevedo-Rincón, L. Mamani, A. J. Delgado C., and J. C. Chaparro. 2020. A new species of terrestrial-breeding frog of the genus Psychrophrynella (Anura: Strabomantidae) from the Cordillera de Vilcabamba, southeastern Peru. Amphibian & Reptile Conservation 14 (3: e260): 127–137.	n/a	n/a	No	Condori, F. P., A. A. Acevedo-Rincón, L. Mamani, A. J. Delgado C., and J. C. Chaparro. 2020. A new species of terrestrial-breeding frog of the genus Psychrophrynella (Anura: Strabomantidae) from the Cordillera de Vilcabamba, southeastern Peru. Amphibian & Reptile Conservation 14 (3: e260): 127–137.
Brachycephaloidea	Craugastoridae	Strabomantis	Strabomantis laticorpus	n/a	30	17.6	1.8	Myers, Charles W., and John D. Lynch. "Eleutherodactylus laticorpus, a peculiar new frog from the Cerro Tacarcuna area, Panamanian-Colombian frontier. American Museum novitates; no. 3196." (1997).	n/a	n/a	No	Myers, Charles W., and John D. Lynch. "Eleutherodactylus laticorpus, a peculiar new frog from the Cerro Tacarcuna area, Panamanian-Colombian frontier. American Museum novitates; no. 3196." (1997).
Brachycephaloidea	Eleutherodactylidae	Adelophryne	Adelophryne mucronata	n/a	12	6.4	0.8	Lourenço-de-Moraes, R., M. Solé, and L. F. Toledo. 2012. A new species of Adelophryne Hoogmoed and Lescure 1984 (Amphibia: Anura: Eleutherodactylidae) from the Atlantic rainforest of southern Bahia, Brazil. Zootaxa 3441: 59–68.	5290	Lourenço-de-Moraes, R., M. Solé, and L. F. Toledo. 2012. A new species of Adelophryne Hoogmoed and Lescure 1984 (Amphibia: Anura: Eleutherodactylidae) from the Atlantic rainforest of southern Bahia, Brazil. Zootaxa 3441: 59–68.	No	Lourenço-de-Moraes, R., M. Solé, and L. F. Toledo. 2012. A new species of Adelophryne Hoogmoed and Lescure 1984 (Amphibia: Anura: Eleutherodactylidae) from the Atlantic rainforest of southern Bahia, Brazil. Zootaxa 3441: 59–68.
Brachycephaloidea	Eleutherodactylidae	Diasporus	Diasporus amirae	n/a	21	9.1	1.2	Arias, E., G. Chaves, S. Salazar, J. A. Salazar-Zúñiga, and A. García-Rodríguez. 2019. A new species of dink frog, genus Diasporus (Anura: Eleutherodactylidae), from the Caribbean foothills of the Cordillera de Talamanca, Costa Rica. Zootaxa 4609: 269–288.	3080	Arias, E., G. Chaves, S. Salazar, J. A. Salazar-Zúñiga, and A. García-Rodríguez. 2019. A new species of dink frog, genus Diasporus (Anura: Eleutherodactylidae), from the Caribbean foothills of the Cordillera de Talamanca, Costa Rica. Zootaxa 4609: 269–288.	No	Arias, E., G. Chaves, S. Salazar, J. A. Salazar-Zúñiga, and A. García-Rodríguez. 2019. A new species of dink frog, genus Diasporus (Anura: Eleutherodactylidae), from the Caribbean foothills of the Cordillera de Talamanca, Costa Rica. Zootaxa 4609: 269–288.
Brachycephaloidea	Eleutherodactylidae	Diasporus	Diasporus vocator	n/a	14.6	6.5	0.7	Arias, E., G. Chaves, S. Salazar, J. A. Salazar-Zúñiga, and A. García-Rodríguez. 2019. A new species of dink frog, genus Diasporus (Anura: Eleutherodactylidae), from the Caribbean foothills of the Cordillera de Talamanca, Costa Rica. Zootaxa 4609: 269–288.	4830	Arias, E., G. Chaves, S. Salazar, J. A. Salazar-Zúñiga, and A. García-Rodríguez. 2019. A new species of dink frog, genus Diasporus (Anura: Eleutherodactylidae), from the Caribbean foothills of the Cordillera de Talamanca, Costa Rica. Zootaxa 4609: 269–288.	n/a	n/a
Brachycephaloidea	Eleutherodactylidae	Eleutherodactylus	Eleutherodactylus adelus	n/a	11.44	5.31	1.14	Díaz, L. M., A. Cádiz, and S. B. Hedges. 2003. A new grass frog from pine forests of western Cuba, and description of acoustic and pattern variation in Eleutherodactylus varleyi (Amphibia: Leptodactylidae). Caribbean Journal of Science 39: 176–188.	4800	Díaz, L. M., A. Cádiz, and S. B. Hedges. 2003. A new grass frog from pine forests of western Cuba, and description of acoustic and pattern variation in Eleutherodactylus varleyi (Amphibia: Leptodactylidae). Caribbean Journal of Science 39: 176–188.	No	Díaz, L. M., A. Cádiz, and S. B. Hedges. 2003. A new grass frog from pine forests of western Cuba, and description of acoustic and pattern variation in Eleutherodactylus varleyi (Amphibia: Leptodactylidae). Caribbean Journal of Science 39: 176–188.
Brachycephaloidea	Eleutherodactylidae	Eleutherodactylus	Eleutherodactylus amadeus	n/a	18.7	8.89	1.15	Hedges, S. B., R. Thomas, and R. Franz. 1987. A new species of Eleutherodactylus (Anura, Leptodactylidae) from the Massif de la Hotte, Haiti. Copeia 1987: 943–949.	2900	Hedges et al. 1987	No	Hedges, S. B., R. Thomas, and R. Franz. 1987. A new species of Eleutherodactylus (Anura, Leptodactylidae) from the Massif de la Hotte, Haiti. Copeia 1987: 943–949.
Brachycephaloidea	Eleutherodactylidae	Eleutherodactylus	Eleutherodactylus coqui	n/a	38	n/a	3.19	James, Taylor, Hunter, Ryan. 2021. Evolutionary and allometric insights into anuran auditory sensitivity and morphology. Brain, Behavior and Evolution.	1950	James, Taylor, Hunter, Ryan. 2021. Evolutionary and allometric insights into anuran auditory sensitivity and morphology. Brain, Behavior and Evolution.	n/a	n/a
Brachycephaloidea	Eleutherodactylidae	Phyzelaphryne	Phyzelaphryne miriamae	n/a	16	7.5	1	Simões, P. I., J. C. L. Costa, F. J. M. Rojas-Runjaic, L. A. G. Gagliardi-Urrutia, M. J. Sturaro, P. L. V. Peloso, and S. Castroviejo-Fisher. 2018. A new species of Phyzelaphryne Heyer, 1977 (Anura: Eleutherodactylidae) from the Japurá River basin, with a discussion of the diversity and distribution of the genus. Zootaxa 4532: 203–230.	3764	Simões, P. I., J. C. L. Costa, F. J. M. Rojas-Runjaic, L. A. G. Gagliardi-Urrutia, M. J. Sturaro, P. L. V. Peloso, and S. Castroviejo-Fisher. 2018. A new species of Phyzelaphryne Heyer, 1977 (Anura: Eleutherodactylidae) from the Japurá River basin, with a discussion of the diversity and distribution of the genus. Zootaxa 4532: 203–230.	No	Simões, P. I., J. C. L. Costa, F. J. M. Rojas-Runjaic, L. A. G. Gagliardi-Urrutia, M. J. Sturaro, P. L. V. Peloso, and S. Castroviejo-Fisher. 2018. A new species of Phyzelaphryne Heyer, 1977 (Anura: Eleutherodactylidae) from the Japurá River basin, with a discussion of the diversity and distribution of the genus. Zootaxa 4532: 203–230.
Brachycephaloidea	Eleutherodactylidae	Phyzelaphryne	Phyzelaphryne nimio	n/a	12.1	6.3	0.7	Simões, P. I., J. C. L. Costa, F. J. M. Rojas-Runjaic, L. A. G. Gagliardi-Urrutia, M. J. Sturaro, P. L. V. Peloso, and S. Castroviejo-Fisher. 2018. A new species of Phyzelaphryne Heyer, 1977 (Anura: Eleutherodactylidae) from the Japurá River basin, with a discussion of the diversity and distribution of the genus. Zootaxa 4532: 203–230.	3852.3	Simões, P. I., J. C. L. Costa, F. J. M. Rojas-Runjaic, L. A. G. Gagliardi-Urrutia, M. J. Sturaro, P. L. V. Peloso, and S. Castroviejo-Fisher. 2018. A new species of Phyzelaphryne Heyer, 1977 (Anura: Eleutherodactylidae) from the Japurá River basin, with a discussion of the diversity and distribution of the genus. Zootaxa 4532: 203–230.	No	Simões, P. I., J. C. L. Costa, F. J. M. Rojas-Runjaic, L. A. G. Gagliardi-Urrutia, M. J. Sturaro, P. L. V. Peloso, and S. Castroviejo-Fisher. 2018. A new species of Phyzelaphryne Heyer, 1977 (Anura: Eleutherodactylidae) from the Japurá River basin, with a discussion of the diversity and distribution of the genus. Zootaxa 4532: 203–230.
Hyloidea	Allophrynidae	Allophryne	Allophryne relicta	n/a	20.6	9.4	0.9	Caramaschi, U., Orrico, V. G., Faivovich, J., Dias, I. R., & Solé, M. (2013). A new species of Allophryne (Anura: Allophrynidae) from the Atlantic rain forest biome of eastern Brazil. Herpetologica, 69(4), 480-491.	3828	Caramaschi, U., Orrico, V. G., Faivovich, J., Dias, I. R., & Solé, M. (2013). A new species of Allophryne (Anura: Allophrynidae) from the Atlantic rain forest biome of eastern Brazil. Herpetologica, 69(4), 480-491.	No	Caramaschi, U., Orrico, V. G., Faivovich, J., Dias, I. R., & Solé, M. (2013). A new species of Allophryne (Anura: Allophrynidae) from the Atlantic rain forest biome of eastern Brazil. Herpetologica, 69(4), 480-491.
Hyloidea	Allophrynidae	Allophryne	Allophryne resplendens	n/a	28.4	12.29	1.1	Castroviejo-Fisher, S., Pérez-Peña, P. E., Padial, J. M., & Guayasamin, J. M. (2012). A second species of the family Allophrynidae (Amphibia: Anura). American Museum Novitates, 2012(3739), 1-17.	n/a	n/a	No
Hyloidea	Allophrynidae	Allophryne	Allophryne ruthveni	n/a	25	n/a	n/a	LFT, Personal observation	5089	Caramaschi, U., Orrico, V. G., Faivovich, J., Dias, I. R., & Solé, M. (2013). A new species of Allophryne (Anura: Allophrynidae) from the Atlantic rain forest biome of eastern Brazil. Herpetologica, 69(4), 480-491.	No	LFT, Personal observation
Hyloidea	Alsodidae	Alsodes	Alsodes australis	IZUA 1626	56.1	26.8	Tympanum indistinct	Ramón Formas, J., Úbeda, C., Cuevas, C., & Núñez, J. (1997). Alsodes australis, a new species of leptodactylid frog from the temperate Nothofagus forest of southern Chile and Argentina. Studies on Neotropical Fauna and Environment, 32(4), 200-211.	n/a	n/a	n/a	n/a
Hyloidea	Alsodidae	Alsodes	Alsodes cantillanensis	SSUC-Am-168	45.9	25.3	Tympanum indistinct	Charrier, A., C. L. Correa-Quezada, C. Castro-Carrasco, and M. A. Méndez-Torres. 2015. A new species of Alsodes (Anura: Alsodidae) from Altos de Cantillana, central Chile. Zootaxa 3915: 540–550.	n/a	n/a	No	Charrier, A., C. L. Correa-Quezada, C. Castro-Carrasco, and M. A. Méndez-Torres. 2015. A new species of Alsodes (Anura: Alsodidae) from Altos de Cantillana, central Chile. Zootaxa 3915: 540–550.
Hyloidea	Alsodidae	Eupsophus	Eupsophus migueli	IZUA 1747-A	34.8	20.7	2.8	Formas, J. R. 1978. A new species of leptodactylid frog (Eupsophus) from the coastal range in southern Chile. Studies on Neotropical Fauna and Environment. Amsterdam 13: 1–9.	1835	Nunez et al. 2012	No	Formas, J. R. 1978. A new species of leptodactylid frog (Eupsophus) from the coastal range in southern Chile. Studies on Neotropical Fauna and Environment. Amsterdam 13: 1–9.
Hyloidea	Alsodidae	Limnomedusa	Limnomedusa macroglossa	ZUEC-AMP 5945	44.89	28.99	3.28		1002.01	Guerra, V., Lingnau, R., de Souza Barreto, B., Kwet, A., & Bastos, R. P. (2018). Vocalizations of Limnomedusa macroglossa (Amphibia: Anura: Alsodidae). Salamandra, 54(1), 97-100.	YES	Guerra, V., Lingnau, R., de Souza Barreto, B., Kwet, A., & Bastos, R. P. (2018). Vocalizations of Limnomedusa macroglossa (Amphibia: Anura: Alsodidae). Salamandra, 54(1), 97-100.
Hyloidea	Alytidae	Alytes	Alytes almogavarii	n/a	39.1	16.3	3.5	Arntzen, J. W., and M. García-París. "Morphological and allozyme studies of midwife toads (genus Alytes), including the description of two new taxa from Spain." Bijdragen tot de Dierkunde 65.1 (1995): 5-34.	n/a	n/a	n/a	n/a
Hyloidea	Alytidae	Alytes	Alytes cisternasii	n/a	36.2	13.3	3.4	Arntzen, J. W., & García-París, M. (1995). Morphological and allozyme studies of midwife toads (genus Alytes), including the description of two new taxa from Spain. Bijdragen tot de Dierkunde, 65(1), 5-34.	1471.1	Márquez, R., & Bosch, J. (1995). Advertisement calls of the midwife toads Alytes (Amphibia, Anura, Discoglossidae) in continental Spain. Journal of Zoological Systematics and Evolutionary Research, 33(3‐4), 185-192.	n/a	n/a
Hyloidea	Alytidae	Alytes	Alytes dickhilleni	n/a	44.2	17.7	3.9	Arntzen, J. W., & García-París, M. (1995). Morphological and allozyme studies of midwife toads (genus Alytes), including the description of two new taxa from Spain. Bijdragen tot de Dierkunde, 65(1), 5-34.	1382.6	Márquez, R., & Bosch, J. (1995). Advertisement calls of the midwife toads Alytes (Amphibia, Anura, Discoglossidae) in continental Spain. Journal of Zoological Systematics and Evolutionary Research, 33(3‐4), 185-192.	No	Egea-Serrano, A., Torralva, M., Tejedo, M., & Oliva-Paternal, F. J. (2006). Breeding Habitat Selection of an Endangered Species in an Arid Zone: The Case of" Alytes dickhilleni" Arntzen and García-París, 1995. Breeding Habitat Selection of an Endangered Species in an Arid Zone, 1000-1014.
Hyloidea	Alytidae	Alytes	Alytes muletensis	n/a	32.6	13.9	3.1	Arntzen, J. W., & García-París, M. (1995). Morphological and allozyme studies of midwife toads (genus Alytes), including the description of two new taxa from Spain. Bijdragen tot de Dierkunde, 65(1), 5-34.	n/a	n/a	n/a	n/a
Hyloidea	Alytidae	Alytes	Alytes obstetricans	n/a	41	16.5	3.6	Arntzen, J. W., & García-París, M. (1995). Morphological and allozyme studies of midwife toads (genus Alytes), including the description of two new taxa from Spain. Bijdragen tot de Dierkunde, 65(1), 5-34.	1241.3	Márquez, R., & Bosch, J. (1995). Advertisement calls of the midwife toads Alytes (Amphibia, Anura, Discoglossidae) in continental Spain. Journal of Zoological Systematics and Evolutionary Research, 33(3‐4), 185-192.	No	Dalbeck, L., Lüscher, B., & Ohlhoff, D. (2007). Beaver ponds as habitat of amphibian communities in a central European highland. Amphibia-Reptilia, 28(4), 493-501.
Hyloidea	Alytidae	Discoglossus	Discoglossus montalentii	n/a	54.9	31.4	5.8	Lanza, B., G. Nascetti, M. Capula, and L. Bullini. 1984. Genetic relationships among West Mediterranean Discoglossus with the description of a new species (Amphibia, Salientia, Discoglossidae). Monitore Zoologico Italiano. Nuova Serie, Supplemento. Firenze 18: 133–152.	900	Glaw, F., & Vences, M. (1991). Bioacoustic differentiation in painted frogs (Discoglossus). Amphibia-Reptilia, 12(4), 385-394.	YES	Bisconti, R., Canestrelli, D., & Nascetti, G. (2013). Has living on islands been so simple? Insights from the insular endemic frog Discoglossus montalentii. PLoS One, 8(2), e55735.
Hyloidea	Alytidae	Discoglossus	Discoglossus sardus	n/a	54.2	28	5.4	Lanza, B., G. Nascetti, M. Capula, and L. Bullini. 1984. Genetic relationships among West Mediterranean Discoglossus with the description of a new species (Amphibia, Salientia, Discoglossidae). Monitore Zoologico Italiano. Nuova Serie, Supplemento. Firenze 18: 133–152.	n/a	n/a	n/a	n/a
Hyloidea	Alytidae	Latonia	Latonia nigriventer	n/a	76.6	16.5	2.3	Perl, R. B., Gafny, S., Malka, Y., Renan, S., Woodhams, D. C., Rollins-Smith, L., ... & Vences, M. (2017). Natural history and conservation of the rediscovered Hula painted frog, Latonia nigriventer. Contributions to Zoology, 86(1), 11-37.	775.5	Perl, R. B., Gafny, S., Malka, Y., Renan, S., Woodhams, D. C., Rollins-Smith, L., ... & Vences, M. (2017). Natural history and conservation of the rediscovered Hula painted frog, Latonia nigriventer. Contributions to Zoology, 86(1), 11-37.	No	Perl, R. B., Gafny, S., Malka, Y., Renan, S., Woodhams, D. C., Rollins-Smith, L., ... & Vences, M. (2017). Natural history and conservation of the rediscovered Hula painted frog, Latonia nigriventer. Contributions to Zoology, 86(1), 11-37.
Hyloidea	Aromobatidae	Allobates	Allobates algorei	n/a	18.9	n/a	0.8	Barrio-Amorós, C. L., and J. C. Santos. 2009. Description of a new Allobates (Anura, Dendrobatidae) from the eastern Andean piedmont, Venezuela. Phyllomedusa. Belo Horizonte 8: 89–104.	5065	Barrio-Amorós, C. L., and J. C. Santos. 2009. Description of a new Allobates (Anura, Dendrobatidae) from the eastern Andean piedmont, Venezuela. Phyllomedusa. Belo Horizonte 8: 89–104.	No	Barrio-Amorós, C. L., and J. C. Santos. 2009. Description of a new Allobates (Anura, Dendrobatidae) from the eastern Andean piedmont, Venezuela. Phyllomedusa. Belo Horizonte 8: 89–104.
Hyloidea	Aromobatidae	Allobates	Allobates amissibilis	IRSNB 4155	16.3	7.6	0.9	Kok, P. J. R., M. Hölting, and R. Ernst. 2013. A third microendemic to the Iwokrama Mountains of central Guyana: a new “cryptic” species of Allobates Zimmerman and Zimmerman, 1988 (Anura: Aromobatidae). Organisms, Diversity & Evolution 13: 621–638.	5522.26	Kok, P. J. R., M. Hölting, and R. Ernst. 2013. A third microendemic to the Iwokrama Mountains of central Guyana: a new “cryptic” species of Allobates Zimmerman and Zimmerman, 1988 (Anura: Aromobatidae). Organisms, Diversity & Evolution 13: 621–638.	n/a	n/a
Hyloidea	Aromobatidae	Anomaloglossus	Anomaloglossus tamacuarensis	n/a	22.4	11.7	1	Myers, Charles W., and Maureen A. Donnelly. "A tepui herpetofauna on a granitic mountain (Tamacuari) in the borderland between Venezuela and Brazil: report from the Phipps Tapirapecó Expedition. American Museum novitates; no. 3213." (1997).	3840	Myers, Charles W., and Maureen A. Donnelly. "A tepui herpetofauna on a granitic mountain (Tamacuari) in the borderland between Venezuela and Brazil: report from the Phipps Tapirapecó Expedition. American Museum novitates; no. 3213." (1997).	YES	Myers, Charles W., and Maureen A. Donnelly. "A tepui herpetofauna on a granitic mountain (Tamacuari) in the borderland between Venezuela and Brazil: report from the Phipps Tapirapecó Expedition. American Museum novitates; no. 3213." (1997).
Hyloidea	Aromobatidae	Aromobates	Aromobates cannatellai	CVULA 8327	22.6	10.8	Tympanum indistinct	Barrio-Amorós, C. L., and J. C. Santos. 2012. A phylogeny for Aromobates (Anura: Dendrobatidae) with description of three new species from the Andes of Venezuela, taxonomic comments on Aromobates saltuensis, A. inflexus, and notes on the conservation status of the genus. Zootaxa 3422: 1–31.	3117.45	Barrio-Amorós, C. L., and J. C. Santos. 2012. A phylogeny for Aromobates (Anura: Dendrobatidae) with description of three new species from the Andes of Venezuela, taxonomic comments on Aromobates saltuensis, A. inflexus, and notes on the conservation status of the genus. Zootaxa 3422: 1–31.	YES	Barrio-Amorós, C. L., and J. C. Santos. 2012. A phylogeny for Aromobates (Anura: Dendrobatidae) with description of three new species from the Andes of Venezuela, taxonomic comments on Aromobates saltuensis, A. inflexus, and notes on the conservation status of the genus. Zootaxa 3422: 1–31.
Hyloidea	Aromobatidae	Aromobates	Aromobates ericksonae	CVULA 8309	21.7	11.1	Tympanum indistinct	Barrio-Amorós, C. L., and J. C. Santos. 2012. A phylogeny for Aromobates (Anura: Dendrobatidae) with description of three new species from the Andes of Venezuela, taxonomic comments on Aromobates saltuensis, A. inflexus, and notes on the conservation status of the genus. Zootaxa 3422: 1–31.	4022	Barrio-Amorós, C. L., and J. C. Santos. 2012. A phylogeny for Aromobates (Anura: Dendrobatidae) with description of three new species from the Andes of Venezuela, taxonomic comments on Aromobates saltuensis, A. inflexus, and notes on the conservation status of the genus. Zootaxa 3422: 1–31.	YES	Barrio-Amorós, C. L., and J. C. Santos. 2012. A phylogeny for Aromobates (Anura: Dendrobatidae) with description of three new species from the Andes of Venezuela, taxonomic comments on Aromobates saltuensis, A. inflexus, and notes on the conservation status of the genus. Zootaxa 3422: 1–31.
Hyloidea	Aromobatidae	Mannophryne	Mannophryne lamarcai	n/a	23	11.1	1.4	Mijares-Urrutia, A., and A. Arends-R. 1999. A new Mannophryne (Anura: Dendrobatidae) from western Venezuela, with comments on the generic allocation of Colostethus larandinus. Herpetologica 55: 106–114.	n/a	n/a	No	Mijares-Urrutia, A., and A. Arends-R. 1999. A new Mannophryne (Anura: Dendrobatidae) from western Venezuela, with comments on the generic allocation of Colostethus larandinus. Herpetologica 55: 106–114.
Hyloidea	Aromobatidae	Mannophryne	Mannophryne leonardoi	n/a	20.18	10.13	1.15	Yústiz, E. 1991. Un nuevo Colostethus (Amphibia: Dendrobatidae) de la Sierra de Barbacoas, Estado Lara, Venezula. Bioagro. Universidad Centroccidental Lisandro Alvarado, Barquisimeto 3: 145–150.	n/a	n/a	YES	Yústiz, E. 1991. Un nuevo Colostethus (Amphibia: Dendrobatidae) de la Sierra de Barbacoas, Estado Lara, Venezula. Bioagro. Universidad Centroccidental Lisandro Alvarado, Barquisimeto 3: 145–150.
Hyloidea	Aromobatidae	Rheobates	Rheobates pseudopalmatus	n/a	35.2	18.2	2	Rivero, Juan A., and Marco A. Serna. "Nuevos Colostethus (Amphibia, Dendrobatidae) del Departamento de Antioquia, Colombia, con la descripción del renacuajo de Colostethus fraterdanieli." Revista de Ecología Latinoamericana 2.1-3 (1995): 45-58.	n/a	n/a	YES	Rivero, Juan A., and Marco A. Serna. "Nuevos Colostethus (Amphibia, Dendrobatidae) del Departamento de Antioquia, Colombia, con la descripción del renacuajo de Colostethus fraterdanieli." Revista de Ecología Latinoamericana 2.1-3 (1995): 45-58.
Hyloidea	Arthroleptidae	Arthroleptis	Arthroleptis adolfifriederici	n/a	42.28	14.24	2.24	Poynton, John C. "A new giant species of Arthroleptis (Amphibia: Anura) from the Rubeho Mountains, Tanzania." African Journal of Herpetology 52.2 (2003): 107-112.	3200	Channing, A., and K. M. Howell. 2006. Amphibians of East Africa. Ithaca, NY: Cornell University Press.	n/a	n/a
Hyloidea	Arthroleptidae	Arthroleptis	Arthroleptis affinis	n/a	36.02	16.06	2.56	Poynton, John C. "A new giant species of Arthroleptis (Amphibia: Anura) from the Rubeho Mountains, Tanzania." African Journal of Herpetology 52.2 (2003): 107-112.	n/a	n/a	n/a	n/a
Hyloidea	Arthroleptidae	Arthroleptis	Arthroleptis bioko	n/a	31.3	16.8	2.2	Blackburn, David C. "A new squeaker frog (arthroleptidae: Arthroleptis) from bioko island, equatorial guinea." Herpetologica 66.3 (2010): 320-334.	n/a	n/a	No	Blackburn, David C. "A new squeaker frog (arthroleptidae: Arthroleptis) from bioko island, equatorial guinea." Herpetologica 66.3 (2010): 320-334.
Hyloidea	Arthroleptidae	Arthroleptis	Arthroleptis fichika	n/a	13.5	6.5	0.8	Blackburn, David C. "A new squeaker frog (arthroleptidae: Arthroleptis) from bioko island, equatorial guinea." Herpetologica 66.3 (2010): 320-334.	n/a	n/a	No	Blackburn, David C. "A new squeaker frog (arthroleptidae: Arthroleptis) from bioko island, equatorial guinea." Herpetologica 66.3 (2010): 320-334.
Hyloidea	Arthroleptidae	Arthroleptis	Arthroleptis kidogo	n/a	14.1	6.3	0.8	Blackburn, David C. "A new squeaker frog (arthroleptidae: Arthroleptis) from bioko island, equatorial guinea." Herpetologica 66.3 (2010): 320-334.	n/a	n/a	No	Blackburn, David C. "A new squeaker frog (arthroleptidae: Arthroleptis) from bioko island, equatorial guinea." Herpetologica 66.3 (2010): 320-334.
Hyloidea	Arthroleptidae	Arthroleptis	Arthroleptis krokosua	n/a	43.3	22.94	3.03	Ernst, Raffael, Alex C. Agyei, and Mark-Oliver Roedel. "A new giant species of Arthroleptis (Amphibia: Anura: Arthroleptidae) from the Krokosua Hills Forest Reserve, south-western Ghana." Zootaxa 1697.1697 (2008): 58-68.	n/a	n/a	No	Ernst, Raffael, Alex C. Agyei, and Mark-Oliver Roedel. "A new giant species of Arthroleptis (Amphibia: Anura: Arthroleptidae) from the Krokosua Hills Forest Reserve, south-western Ghana." Zootaxa 1697.1697 (2008): 58-68.
Hyloidea	Arthroleptidae	Arthroleptis	Arthroleptis langeri	n/a	16.2	7.4	1	Roedel, Mark-Oliver, et al. "A new small Arthroleptis (Amphibia: Anura: Arthroleptidae) from the Liberian part of Mount Nimba, West Africa." Zootaxa 2302.1 (2009): 19-30.	n/a	n/a	No	Roedel, Mark-Oliver, et al. "A new small Arthroleptis (Amphibia: Anura: Arthroleptidae) from the Liberian part of Mount Nimba, West Africa." Zootaxa 2302.1 (2009): 19-30.
Hyloidea	Arthroleptidae	Arthroleptis	Arthroleptis nikeae	n/a	54.04	22.86	2.92	Poynton, John C. "A new giant species of Arthroleptis (Amphibia: Anura) from the Rubeho Mountains, Tanzania." African Journal of Herpetology 52.2 (2003): 107-112.	n/a	n/a	No	Poynton, John C. "A new giant species of Arthroleptis (Amphibia: Anura) from the Rubeho Mountains, Tanzania." African Journal of Herpetology 52.2 (2003): 107-112.
Hyloidea	Arthroleptidae	Arthroleptis	Arthroleptis nlonakoensis	n/a	21.7	10.3	1.3	Planth, Mirco, Hans-Werner Herrann, and Wolfgang Böhme. "New frog species of the genus Phrynobatrachus (Anura: Phrynobatrachidae) from Mt. Nlonako, Cameroon." Journal of Herpetology (2006): 486-495.	n/a	n/a	No	Planth, Mirco, Hans-Werner Herrann, and Wolfgang Böhme. "New frog species of the genus Phrynobatrachus (Anura: Phrynobatrachidae) from Mt. Nlonako, Cameroon." Journal of Herpetology (2006): 486-495.
Hyloidea	Arthroleptidae	Arthroleptis	Arthroleptis palava	n/a	22.2	10.7	1.1	Blackburn, David C., Václav Gvoždík, and Adam D. Leaché. "A new squeaker frog (Arthroleptidae: Arthroleptis) from the mountains of Cameroon and Nigeria." Herpetologica 66.3 (2010): 335-348.	n/a	n/a	No	Blackburn, David C., Václav Gvoždík, and Adam D. Leaché. "A new squeaker frog (Arthroleptidae: Arthroleptis) from the mountains of Cameroon and Nigeria." Herpetologica 66.3 (2010): 335-348.
Hyloidea	Arthroleptidae	Arthroleptis	Arthroleptis perreti	n/a	27.4	14.6	1.5	Blackburn, David C., et al. "A new squeaker frog (Arthroleptidae: Arthroleptis) from the Cameroon Volcanic Line with redescriptions of Arthroleptis adolfifriederici Nieden, 1911 “1910” and A. variabilis Matschie, 1893." Breviora 515.1 (2009): 1-22.	n/a	n/a	No	Blackburn, David C., et al. "A new squeaker frog (Arthroleptidae: Arthroleptis) from the Cameroon Volcanic Line with redescriptions of Arthroleptis adolfifriederici Nieden, 1911 “1910” and A. variabilis Matschie, 1893." Breviora 515.1 (2009): 1-22.
Hyloidea	Arthroleptidae	Arthroleptis	Arthroleptis tanneri	n/a	53.56	23.73	3.05	Poynton, John C. "A new giant species of Arthroleptis (Amphibia: Anura) from the Rubeho Mountains, Tanzania." African Journal of Herpetology 52.2 (2003): 107-112.	n/a	n/a	n/a	n/a
Hyloidea	Arthroleptidae	Astylosternus	Astylosternus laticephalus	n/a	66.5	27.3	5	NOPPER, CHRISTIAN BREDE10, et al. "The genus Astylosternus in the Upper Guinea rainforests, West Africa, with the description of a new species (Amphibia: Anura: Arthroleptidae)." Zootaxa 3245 (2012): 1-29.	n/a	n/a	YES	NOPPER, CHRISTIAN BREDE10, et al. "The genus Astylosternus in the Upper Guinea rainforests, West Africa, with the description of a new species (Amphibia: Anura: Arthroleptidae)." Zootaxa 3245 (2012): 1-29.
Hyloidea	Arthroleptidae	Astylosternus	Astylosternus occidentalis	n/a	52	24.6	4	NOPPER, CHRISTIAN BREDE10, et al. "The genus Astylosternus in the Upper Guinea rainforests, West Africa, with the description of a new species (Amphibia: Anura: Arthroleptidae)." Zootaxa 3245 (2012): 1-29.	n/a	n/a	YES	NOPPER, CHRISTIAN BREDE10, et al. "The genus Astylosternus in the Upper Guinea rainforests, West Africa, with the description of a new species (Amphibia: Anura: Arthroleptidae)." Zootaxa 3245 (2012): 1-29.
Hyloidea	Arthroleptidae	Cardioglossa	Cardioglossa annulata	n/a	22.8	10.3	1.9	Hirschfeld, Mareike, et al. "Two new species of long-fingered frogs of the genus Cardioglossa (Anura: Arthroleptidae) from Central African rainforests." African Journal of Herpetology64.2 (2015): 81-102.	n/a	n/a	No	Hirschfeld, Mareike, et al. "Two new species of long-fingered frogs of the genus Cardioglossa (Anura: Arthroleptidae) from Central African rainforests." African Journal of Herpetology64.2 (2015): 81-102.
Hyloidea	Arthroleptidae	Cardioglossa	Cardioglossa congolia	n/a	23.2	10.9	1.8	Hirschfeld, Mareike, et al. "Two new species of long-fingered frogs of the genus Cardioglossa (Anura: Arthroleptidae) from Central African rainforests." African Journal of Herpetology64.2 (2015): 81-102.	n/a	n/a	No	Hirschfeld, Mareike, et al. "Two new species of long-fingered frogs of the genus Cardioglossa (Anura: Arthroleptidae) from Central African rainforests." African Journal of Herpetology64.2 (2015): 81-102.
Hyloidea	Arthroleptidae	Cardioglossa	Cardioglossa occidentalis	n/a	26.9	11.8	1.6	Blackburn, David C., et al. "A new species of Cardioglossa (Anura: Arthroleptidae) from the Upper Guinean forests of West Africa." Copeia 2008.3 (2008): 603-612.	4100	Blackburn, David C., et al. "A new species of Cardioglossa (Anura: Arthroleptidae) from the Upper Guinean forests of West Africa." Copeia 2008.3 (2008): 603-612.	YES	Blackburn, David C., et al. "A new species of Cardioglossa (Anura: Arthroleptidae) from the Upper Guinean forests of West Africa." Copeia 2008.3 (2008): 603-612.
Hyloidea	Arthroleptidae	Cardioglossa	Cardioglossa oreas	n/a	23	11.6	1	Blackburn, David C. "A new species of Cardioglossa (Amphibia: Anura: Arthroleptidae) endemic to Mount Manengouba in the Republic of Cameroon, with an analysis of morphological diversity in the genus." Zoological Journal of the Linnean Society 154.3 (2008): 611-630.	n/a	n/a	n/a	n/a
Hyloidea	Arthroleptidae	Leptodactylodon	Leptodactylodon stevarti	n/a	22.1	8	1	Rodel, M. O., and OLIVIER SG Pauwels. "A new Leptodactylodon species from Gabon (Amphibia: Anura: Astylosternidae)." SALAMANDRA-BONN- 39.3/4 (2003): 139-148.	n/a	n/a	YES	Rodel, M. O., and OLIVIER SG Pauwels. "A new Leptodactylodon species from Gabon (Amphibia: Anura: Astylosternidae)." SALAMANDRA-BONN- 39.3/4 (2003): 139-148.
Hyloidea	Arthroleptidae	Leptopelis	Leptopelis anebos	n/a	35.6	19.2	2.1	Portillo, Frank, and Eli Greenbaum. "At the edge of a species boundary: A new and relatively young species of Leptopelis (Anura: Arthroleptidae) from the Itombwe Plateau, Democratic Republic of the Congo." Herpetologica 70.1 (2014): 100-119.	1910	Portillo, Frank, and Eli Greenbaum. "At the edge of a species boundary: A new and relatively young species of Leptopelis (Anura: Arthroleptidae) from the Itombwe Plateau, Democratic Republic of the Congo." Herpetologica 70.1 (2014): 100-119.	YES	Portillo, Frank, and Eli Greenbaum. "At the edge of a species boundary: A new and relatively young species of Leptopelis (Anura: Arthroleptidae) from the Itombwe Plateau, Democratic Republic of the Congo." Herpetologica 70.1 (2014): 100-119.
Hyloidea	Arthroleptidae	Leptopelis	Leptopelis karissimbensis	n/a	36.9	18.3	1.9	Portillo, Frank, and Eli Greenbaum. "At the edge of a species boundary: A new and relatively young species of Leptopelis (Anura: Arthroleptidae) from the Itombwe Plateau, Democratic Republic of the Congo." Herpetologica 70.1 (2014): 100-119.	1470	Portillo, Frank, and Eli Greenbaum. "At the edge of a species boundary: A new and relatively young species of Leptopelis (Anura: Arthroleptidae) from the Itombwe Plateau, Democratic Republic of the Congo." Herpetologica 70.1 (2014): 100-119.	YES	Portillo, Frank, and Eli Greenbaum. "At the edge of a species boundary: A new and relatively young species of Leptopelis (Anura: Arthroleptidae) from the Itombwe Plateau, Democratic Republic of the Congo." Herpetologica 70.1 (2014): 100-119.
Hyloidea	Arthroleptidae	Leptopelis	Leptopelis mackayi	n/a	34	16.9	2.3	Köhler, Jörn, et al. "A new species of arboreal Leptopelis (Anura: Arthroleptidae) from the forests of western Kenya." The Herpetological Journal 16.2 (2006): 183-189.	1590.56	Köhler, Jörn, et al. "A new species of arboreal Leptopelis (Anura: Arthroleptidae) from the forests of western Kenya." The Herpetological Journal 16.2 (2006): 183-189.	YES	Köhler, Jörn, et al. "A new species of arboreal Leptopelis (Anura: Arthroleptidae) from the forests of western Kenya." The Herpetological Journal 16.2 (2006): 183-189.
Hyloidea	Arthroleptidae	Leptopelis	Leptopelis modestus	n/a	31.4	17	2.6	Portillo, Frank, and Eli Greenbaum. "A new species of the Leptopelis modestus complex (Anura: Arthroleptidae) from the Albertine Rift of Central Africa." Journal of Herpetology 48.3 (2014): 394-406.	2000	Channing, A., and K. M. Howell. 2006. Amphibians of East Africa. Ithaca, NY: Cornell University Press.	n/a	n/a
Hyloidea	Arthroleptidae	Leptopelis	Leptopelis mtoewaate	n/a	38	n/a	2.1	Portillo, Frank, and Eli Greenbaum. "A new species of the Leptopelis modestus complex (Anura: Arthroleptidae) from the Albertine Rift of Central Africa." Journal of Herpetology 48.3 (2014): 394-406.	1680	Portillo, Frank, and Eli Greenbaum. "A new species of the Leptopelis modestus complex (Anura: Arthroleptidae) from the Albertine Rift of Central Africa." Journal of Herpetology 48.3 (2014): 394-406.	YES	Portillo, Frank, and Eli Greenbaum. "A new species of the Leptopelis modestus complex (Anura: Arthroleptidae) from the Albertine Rift of Central Africa." Journal of Herpetology 48.3 (2014): 394-406.
Hyloidea	Arthroleptidae	Leptopelis	Leptopelis spiritusnoctis	n/a	30.7	13.3	2.8	Rödel, Mark?Oliver. "The identity of Hylambates hyloides Boulenger, 1906 and description of a new small species of Leptopelis from West Africa." Zoosystematics and Evolution83.S1 (2007): 90-100.	n/a	n/a	YES	Rödel, Mark?Oliver. "The identity of Hylambates hyloides Boulenger, 1906 and description of a new small species of Leptopelis from West Africa." Zoosystematics and Evolution83.S1 (2007): 90-100.
Hyloidea	Arthroleptidae	Leptopelis	Leptopelis viridis	n/a	33.1	13.6	2.4	Rödel, Mark?Oliver. "The identity of Hylambates hyloides Boulenger, 1906 and description of a new small species of Leptopelis from West Africa." Zoosystematics and Evolution83.S1 (2007): 90-100.	2250	Schiotz 1999	n/a	n/a
Hyloidea	Ascaphidae	Ascaphus	Ascaphus truei	USNM 25979	40	n/a	Tympanum indistinct	Stejneger, L. 1899. Description of a new genus and species of discoglossoid toad from North America. Proceedings of the United States National Museum 21: 899–901.	n/a	n/a	n/a	n/a
Hyloidea	Batrachylidae	Atelognathus	Atelognathus praebasalticus	IBAUNC 1845/6	29	12.5	Tympanum indistinct	Cei, J. M., and V. G. Roig. 1968. Telmatobiinos de las lagunas basalticas de Neuquen (Anura, Leptodactylidae). Physis. Buenos Aires 27: 265–284.	n/a	n/a	n/a	n/a
Hyloidea	Batrachylidae	Atelognathus	Atelognathus reverberii	IBAUNC 1980/1	38	17	Tympanum indistinct		2300		No
Hyloidea	Batrachylidae	Batrachyla	Batrachyla fitzroya	n/a	30.97	14.05	1.39	Basso, Néstor Guillermo. "Una nueva especie de Batrachyla (Anura: leptodactylidae: telmatobiinae) de Argentina." Cuadernos de Herpetología 8 (1994).	n/a	n/a	n/a	n/a
Hyloidea	Batrachylidae	Batrachyla	Batrachyla nibaldoi	n/a	39.9	18.6	2.5	Formas, J. Ramón. "A new species of Batrachyla (Anura: Leptodactylidae) from southern Chile." Herpetologica (1997): 6-13.	n/a	n/a	No	Formas, J. Ramón. "A new species of Batrachyla (Anura: Leptodactylidae) from southern Chile." Herpetologica (1997): 6-13.
Hyloidea	Batrachylidae	Chaltenobatrachus	Chaltenobatrachus grandisonae	n/a	33.3	14.6	Tympanum indistinct	Basso, N. G., C. A. Úbeda, M. M. Bunge, and L. B. Martinazzo. 2011. A new genus of neobatrachian frog from southern Patagonian forests, Argentina and Chile. Zootaxa 3002: 31–44.	n/a	n/a	No	Basso, N. G., C. A. Úbeda, M. M. Bunge, and L. B. Martinazzo. 2011. A new genus of neobatrachian frog from southern Patagonian forests, Argentina and Chile. Zootaxa 3002: 31–44.
Hyloidea	Bombinatoridae	Barbourula	Barbourula busuangensis	MCZ 14004	46	n/a	Tympanum indistinct	Taylor, E. H., and G. K. Noble. 1924. A new genus of discoglossid frogs from the Philippine Islands. American Museum Novitates 121: 1–4 (http://digitallibrary.amnh.org/handle/2246/3208).	n/a	n/a	YES	Taylor, E. H., and G. K. Noble. 1924. A new genus of discoglossid frogs from the Philippine Islands. American Museum Novitates 121: 1–4 (http://digitallibrary.amnh.org/handle/2246/3208).
Hyloidea	Bombinatoridae	Barbourula	Barbourula kalimantanensis	MZB Amph. 2330	68	n/a	Tympanum indistinct	Iskandar, D. T. 1978. A new species of Barbourula: First record of a discoglossid anuran in Borneo. Copeia 1978: 564–566.	n/a	n/a	YES	Iskandar, D. T. 1978. A new species of Barbourula: First record of a discoglossid anuran in Borneo. Copeia 1978: 564–566.
Hyloidea	Bombinatoridae	Bombina	Bombina orientalis	ZUEC-AMP 21172	34.91	15.42	Tympanum indistinct		n/a	n/a	n/a	n/a
Hyloidea	Bombinatoridae	Bombina	Bombina variegata	ZUEC-AMP 21173	33.06	13.51	Tympanum indistinct		n/a	n/a	n/a	n/a
Hyloidea	Brevicipitidae	Balebreviceps	Balebreviceps hillmani	LIV 1986.212.385	37.7	10.74	Tympanum indistinct	Largen, M. J., and R. C. Drewes. 1989. A new genus and species of brevicipitine frog (Amphibia, Anura, Microhylidae) from high altitude in the mountains of Ethiopia. Tropical Zoology. Firenze 2: 13–30.	n/a	n/a	No	Largen, M. J., and R. C. Drewes. 1989. A new genus and species of brevicipitine frog (Amphibia, Anura, Microhylidae) from high altitude in the mountains of Ethiopia. Tropical Zoology. Firenze 2: 13–30.
Hyloidea	Brevicipitidae	Breviceps	Breviceps bagginsi	n/a	24	n/a	Tympanum indistinct	Minter, L. R. 2003. Two new cryptic species of Breviceps (Anura: Microhylidae) from southern Africa. African Journal of Herpetology 52: 9–21.	2552	Minter, L. R. 2003. Two new cryptic species of Breviceps (Anura: Microhylidae) from southern Africa. African Journal of Herpetology 52: 9–21.	No	Minter, L. R. 2003. Two new cryptic species of Breviceps (Anura: Microhylidae) from southern Africa. African Journal of Herpetology 52: 9–21.
Hyloidea	Brevicipitidae	Breviceps	Breviceps sopranus	n/a	23.8	n/a	Tympanum indistinct	Minter, L. R. 2003. Two new cryptic species of Breviceps (Anura: Microhylidae) from southern Africa. African Journal of Herpetology 52: 9–21.	3332	Minter, L. R. 2003. Two new cryptic species of Breviceps (Anura: Microhylidae) from southern Africa. African Journal of Herpetology 52: 9–21.	No	Minter, L. R. 2003. Two new cryptic species of Breviceps (Anura: Microhylidae) from southern Africa. African Journal of Herpetology 52: 9–21.
Hyloidea	Brevicipitidae	Callulina	Callulina dawida	NMK A/4267	29.6	10.4	1.6	Loader, S. P., G. J. Measey, R. O. de Sá, and P. K. Malonza. 2009. A new brevicipitid species (Brevicipitidae: Callulina) from the fragmented forests of the Taita Hills, Kenya. Zootaxa 2123: 55–68.	1600	Loader, S. P., G. J. Measey, R. O. de Sá, and P. K. Malonza. 2009. A new brevicipitid species (Brevicipitidae: Callulina) from the fragmented forests of the Taita Hills, Kenya. Zootaxa 2123: 55–68.	No	Loader, S. P., G. J. Measey, R. O. de Sá, and P. K. Malonza. 2009. A new brevicipitid species (Brevicipitidae: Callulina) from the fragmented forests of the Taita Hills, Kenya. Zootaxa 2123: 55–68.
Hyloidea	Brevicipitidae	Callulina	Callulina kanga	n/a	23.4	8.8	1	Loader, S. P., D. J. Gower, H. Müller, and M. Menegon. 2010. Two new species of Callulina (Amphibia: Anura: Brevicipitidae) from the Nguru Mountains, Tanzania. Zootaxa 2694: 26–42.	n/a	n/a	No	Loader, S. P., D. J. Gower, H. Müller, and M. Menegon. 2010. Two new species of Callulina (Amphibia: Anura: Brevicipitidae) from the Nguru Mountains, Tanzania. Zootaxa 2694: 26–42.
Hyloidea	Brevicipitidae	Probreviceps	Probreviceps macrodactylus	ZUEC-AMP 19101	29.52	9.83	1.67		n/a	n/a	n/a	n/a
Hyloidea	Bufonidae	Adenomus	Adenomus kandianus	n/a	32.24	n/a	Tympanum indistinct	Wickramasinghe, LJ MENDIS, Dulan Ranga Vidanapathirana, and Nethu Wickramasinghe. "Back from the dead: The world’s rarest toad Adenomus kandianus rediscovered in Sri Lanka." Zootaxa 3347.1 (2012): 63-68.	2239	Meegaskumbura, Madhava, et al. "The Sri Lankan torrent toads (Bufonidae: Adenominae: Adenomus): species boundaries assessed using multiple criteria." Zootaxa 3911.2 (2015): 245-261.	YES	Wickramasinghe, LJ MENDIS, Dulan Ranga Vidanapathirana, and Nethu Wickramasinghe. "Back from the dead: The world’s rarest toad Adenomus kandianus rediscovered in Sri Lanka." Zootaxa 3347.1 (2012): 63-68.
Hyloidea	Bufonidae	Amazophrynella	Amazophrynella bokermanni	n/a	22	n/a	n/a		1905.6	Rojas, R. R., De Carvalho, V. T., Ávila, R. W., Kawashita-Ribeiro, R. A., Hrbek, T., & Gordo, M. (2018). Description of the advertisement calls of four species of Amazophrynella (Anura:bufonidae). Zootaxa, 4459(1), 193.	No	Rojas, R. R., De Carvalho, V. T., Gordo, M., ÁvilA, R. W., Farias, I. P., & Hrbek, T. (2013). A new species of Amazophrynella (Anura:bufonidae) from the southwestern part of the Brazilian Guiana Shield. Zootaxa, 3753(1), 79.
Hyloidea	Bufonidae	Amazophrynella	Amazophrynella manaos	n/a	15	n/a	n/a		3338.8	Rojas, R. R., De Carvalho, V. T., Ávila, R. W., Kawashita-Ribeiro, R. A., Hrbek, T., & Gordo, M. (2018). Description of the advertisement calls of four species of Amazophrynella (Anura:bufonidae). Zootaxa, 4459(1), 193.	No	Rojas, R. R., De Carvalho, V. T., Gordo, M., ÁvilA, R. W., Farias, I. P., & Hrbek, T. (2013). A new species of Amazophrynella (Anura:bufonidae) from the southwestern part of the Brazilian Guiana Shield. Zootaxa, 3753(1), 79.
Hyloidea	Bufonidae	Amazophrynella	Amazophrynella minuta	n/a	15.6	n/a	n/a		n/a	n/a	No	Rojas, R. R., De Carvalho, V. T., Gordo, M., ÁvilA, R. W., Farias, I. P., & Hrbek, T. (2013). A new species of Amazophrynella (Anura:bufonidae) from the southwestern part of the Brazilian Guiana Shield. Zootaxa, 3753(1), 79.
Hyloidea	Bufonidae	Amazophrynella	Amazophrynella vote	n/a	16.4	n/a	n/a		3204.1	Rojas, R. R., De Carvalho, V. T., Ávila, R. W., Kawashita-Ribeiro, R. A., Hrbek, T., & Gordo, M. (2018). Description of the advertisement calls of four species of Amazophrynella (Anura:bufonidae). Zootaxa, 4459(1), 193.	No	Rojas, R. R., De Carvalho, V. T., Gordo, M., ÁvilA, R. W., Farias, I. P., & Hrbek, T. (2013). A new species of Amazophrynella (Anura:bufonidae) from the southwestern part of the Brazilian Guiana Shield. Zootaxa, 3753(1), 79.
Hyloidea	Bufonidae	Anaxyrus	Anaxyrus americanus	n/a	61.1	n/a	11.27	James, Taylor, Hunter, Ryan. 2021. Evolutionary and allometric insights into anuran auditory sensitivity and morphology. Brain, Behavior and Evolution.	1641.92	James, Taylor, Hunter, Ryan. 2021. Evolutionary and allometric insights into anuran auditory sensitivity and morphology. Brain, Behavior and Evolution.	n/a	n/a
Hyloidea	Bufonidae	Anaxyrus	Anaxyrus boreas	ZUEC-AMP 21760	32.67	12.53	0.87		1285	Eliiot et al. 2009	No	Muths, Erin, and Rick D. Scherer. "Portrait of a small population of boreal toads (Anaxyrus boreas)." Herpetologica67.4 (2011): 369-377.
Hyloidea	Bufonidae	Anaxyrus	Anaxyrus cognatus	n/a	74.4	n/a	10.35	James, Taylor, Hunter, Ryan. 2021. Evolutionary and allometric insights into anuran auditory sensitivity and morphology. Brain, Behavior and Evolution.	2191.23	James, Taylor, Hunter, Ryan. 2021. Evolutionary and allometric insights into anuran auditory sensitivity and morphology. Brain, Behavior and Evolution.	n/a	n/a
Hyloidea	Bufonidae	Anaxyrus	Anaxyrus exsul	n/a	120	20.5	4	Myers, George Sprague. "The black toad of deep springs valley, Inyo County, California." (1942).	1187	Eliiot et al. 2009	n/a	n/a
Hyloidea	Bufonidae	Anaxyrus	Anaxyrus exsul	n/a	64	24.2	3.23	Gordon, Michelle R., Eric T. Simandle, and C. Richard Tracy. "A diamond in the rough desert shrublands of the Great Basin in the Western United States: A new cryptic toad species (Amphibia: Bufonidae: Bufo (Anaxyrus)) discovered in Northern Nevada." (2017).	n/a	n/a	n/a	n/a
Hyloidea	Bufonidae	Anaxyrus	Anaxyrus monfontanus	n/a	59.6	19.7	2.5	Gordon, Michelle R., Eric T. Simandle, and C. Richard Tracy. "A diamond in the rough desert shrublands of the Great Basin in the Western United States: A new cryptic toad species (Amphibia: Bufonidae: Bufo (Anaxyrus)) discovered in Northern Nevada." (2017).	n/a	n/a	No	Gordon, Michelle R., Eric T. Simandle, and C. Richard Tracy. "A diamond in the rough desert shrublands of the Great Basin in the Western United States: A new cryptic toad species (Amphibia: Bufonidae: Bufo (Anaxyrus)) discovered in Northern Nevada." (2017).
Hyloidea	Bufonidae	Anaxyrus	Anaxyrus nelsoni	n/a	80.8	30.3	2.74	Gordon, Michelle R., Eric T. Simandle, and C. Richard Tracy. "A diamond in the rough desert shrublands of the Great Basin in the Western United States: A new cryptic toad species (Amphibia: Bufonidae: Bufo (Anaxyrus)) discovered in Northern Nevada." (2017).	1051	Tonini, João Filipe Riva, et al. "Allometric escape from acoustic constraints is rare for frog calls." Ecology and Evolution 10.8 (2020): 3686-3695.	n/a	n/a
Hyloidea	Bufonidae	Anaxyrus	Anaxyrus punctatus	ZUEC-AMP 21151	42.16	19.12	2.39		2408	Tonini, João Filipe Riva, et al. "Allometric escape from acoustic constraints is rare for frog calls." Ecology and Evolution 10.8 (2020): 3686-3695.	No	Turner, Frederick B. "Some features of the ecology of Bufo punctatus in Death Valley, California." Ecology 40.2 (1959): 175-181.
Hyloidea	Bufonidae	Anaxyrus	Anaxyrus williamsi	n/a	54.6	18.2	2.81	Gordon, Michelle R., Eric T. Simandle, and C. Richard Tracy. "A diamond in the rough desert shrublands of the Great Basin in the Western United States: A new cryptic toad species (Amphibia: Bufonidae: Bufo (Anaxyrus)) discovered in Northern Nevada." (2017).	n/a	n/a	No	Gordon, Michelle R., Eric T. Simandle, and C. Richard Tracy. "A diamond in the rough desert shrublands of the Great Basin in the Western United States: A new cryptic toad species (Amphibia: Bufonidae: Bufo (Anaxyrus)) discovered in Northern Nevada." (2017).
Hyloidea	Bufonidae	Ansonia	Ansonia echinata	n/a	20	9.4	1.8	Inger, Robert F., and Robert B. Stuebing. "New species and new records of Bornean frogs (Amphibia: Anura)." The Raffles Bull. Zool 57.2 (2009): 527-535.	n/a	n/a	n/a	n/a
Hyloidea	Bufonidae	Ansonia	Ansonia inthanon	n/a	23.1	10.4	1.4	Matsui, Masafumi, Jarujin Nabhitabhata, and Somsak Panha. "A new Ansonia from northern Thailand (Anura: Bufonidae)." Herpetologica (1998): 448-454.	n/a	n/a	YES	Matsui, Masafumi, Jarujin Nabhitabhata, and Somsak Panha. "A new Ansonia from northern Thailand (Anura: Bufonidae)." Herpetologica (1998): 448-454.
Hyloidea	Bufonidae	Ansonia	Ansonia jeetsukumarani	n/a	25	11.3	1.9	Wood Jr, Perry L., et al. "Two new species of torrent-dwelling toads Ansonia Stoliczka, 1870 (Anura: Bufonidae) from Peninsular Malaysia." Herpetologica 64.3 (2008): 321-340.	n/a	n/a	YES	Wood Jr, Perry L., et al. "Two new species of torrent-dwelling toads Ansonia Stoliczka, 1870 (Anura: Bufonidae) from Peninsular Malaysia." Herpetologica 64.3 (2008): 321-340.
Hyloidea	Bufonidae	Ansonia	Ansonia kraensis	n/a	21.3	10.65	1.29	Matsui, Masafumi, Wichase Khonsue, and Jarujin Nabhitabhata. "A new Ansonia from the Isthmus of Kra, Thailand (Amphibia, Anura, Bufonidae)." Zoological Science22.7 (2005): 809-815.	n/a	n/a	YES	Matsui, Masafumi, Wichase Khonsue, and Jarujin Nabhitabhata. "A new Ansonia from the Isthmus of Kra, Thailand (Amphibia, Anura, Bufonidae)." Zoological Science22.7 (2005): 809-815.
Hyloidea	Bufonidae	Ansonia	Ansonia latiffi	n/a	34.5	18.3	1.8	Wood Jr, Perry L., et al. "Two new species of torrent-dwelling toads Ansonia Stoliczka, 1870 (Anura: Bufonidae) from Peninsular Malaysia." Herpetologica 64.3 (2008): 321-340.	n/a	n/a	YES	Wood Jr, Perry L., et al. "Two new species of torrent-dwelling toads Ansonia Stoliczka, 1870 (Anura: Bufonidae) from Peninsular Malaysia." Herpetologica 64.3 (2008): 321-340.
Hyloidea	Bufonidae	Ansonia	Ansonia latirostra	n/a	20.4	10.4	1.2	Grismer, L. Lee. "A new species of Ansonia Stoliczka 1872 (Anura: Bufonidae) from central Peninsular Malaysia and a revised taxonomy for Ansonia from the Malay Peninsula." Zootaxa 1327.1 (2006): 1-21.	n/a	n/a	YES	Grismer, L. Lee. "A new species of Ansonia Stoliczka 1872 (Anura: Bufonidae) from central Peninsular Malaysia and a revised taxonomy for Ansonia from the Malay Peninsula." Zootaxa 1327.1 (2006): 1-21.
Hyloidea	Bufonidae	Ansonia	Ansonia lumut	n/a	22.3	11.3	1.3	Chan, Kin Onn, et al. "A new species of upland Stream Toad of the genus Ansonia Stoliczka, 1870 (Anura: Bufonidae) from northeastern Peninsular Malaysia." Zootaxa 3764.4 (2014): 427-440.	n/a	n/a	YES	Chan, Kin Onn, et al. "A new species of upland Stream Toad of the genus Ansonia Stoliczka, 1870 (Anura: Bufonidae) from northeastern Peninsular Malaysia." Zootaxa 3764.4 (2014): 427-440.
Hyloidea	Bufonidae	Ansonia	Ansonia phuketensis	n/a	24.3	11.67	1.41	Matsui, Masafumi, Wichase Khonsue, and Somsak Panha. "Two New Species of Ansonia from Thailand (Anura: Bufonidae)." Zoological science 35.1 (2018): 39-49.	7600	Matsui, Masafumi, Wichase Khonsue, and Somsak Panha. "Two New Species of Ansonia from Thailand (Anura: Bufonidae)." Zoological science 35.1 (2018): 39-48.	YES	Matsui, Masafumi, Wichase Khonsue, and Somsak Panha. "Two New Species of Ansonia from Thailand (Anura: Bufonidae)." Zoological science 35.1 (2018): 39-48.
Hyloidea	Bufonidae	Ansonia	Ansonia pilokensis	n/a	22	9.8	1.14	Matsui, Masafumi, Wichase Khonsue, and Somsak Panha. "Two New Species of Ansonia from Thailand (Anura: Bufonidae)." Zoological science 35.1 (2018): 39-49.	n/a	n/a	YES	Matsui, Masafumi, Wichase Khonsue, and Somsak Panha. "Two New Species of Ansonia from Thailand (Anura: Bufonidae)." Zoological science 35.1 (2018): 39-48.
Hyloidea	Bufonidae	Ansonia	Ansonia smeagol	n/a	20	5.1	1.1	Davis, Hayden R., et al. "The phylogenetic relationships of a new Stream Toad of the genus Ansonia Stoliczka, 1870 (Anura: Bufonidae) from a montane region in Peninsular Malaysia." Zootaxa 4103.2 (2016): 137-153.	n/a	n/a	YES	Davis, Hayden R., et al. "The phylogenetic relationships of a new Stream Toad of the genus Ansonia Stoliczka, 1870 (Anura: Bufonidae) from a montane region in Peninsular Malaysia." Zootaxa 4103.2 (2016): 137-153.
Hyloidea	Bufonidae	Ansonia	Ansonia thinthinae	n/a	25	12.1	1.2	Wilkinson, Jeffery A., Anna B. Sellas, and Jens V. Vindum. "A new species of Ansonia (Anura: Bufonidae) from northern Tanintharyi Division, Myanmar." Zootaxa 3163.1 (2012): 54-68.	n/a	n/a	YES
Hyloidea	Bufonidae	Atelopus	Atelopus ardila	n/a	38.6	14.41	Tympanum indistinct	Coloma, L. A., W. E. Duellman, A. Almendáriz C., S. R. Ron, A. Terán-Valdez, and J. M. Guayasamin. 2010. Five new (extinct?) species of Atelopus (Anura: Bufonidae) from Andean Colombia, Ecuador, and Peru. Zootaxa 2574: 1–54.	n/a	n/a	No	Coloma, L. A., W. E. Duellman, A. Almendáriz C., S. R. Ron, A. Terán-Valdez, and J. M. Guayasamin. 2010. Five new (extinct?) species of Atelopus (Anura: Bufonidae) from Andean Colombia, Ecuador, and Peru. Zootaxa 2574: 1–54.
Hyloidea	Bufonidae	Atelopus	Atelopus pedimarmoratus	n/a	29.8	10.1	Tympanum indistinct	Rivero, J. A. 1963. Five new species of Atelopus from Colombia, with notes on other forms from Colombia and Ecuador. Caribbean Journal of Science 3: 103–124.	n/a	n/a	n/a	n/a
Hyloidea	Bufonidae	Barbarophryne	Barbarophryne brongersmai	n/a	41	14.8	2.3	Hoogmoed, M. S. "On a new species of toad from southern Morocco." Zoologische Mededelingen 47.5 (1972): 49-64.	n/a	n/a	No	Hoogmoed, M. S. "On a new species of toad from southern Morocco." Zoologische Mededelingen 47.5 (1972): 49-64.
Hyloidea	Bufonidae	Beduka	Beduka amboli	n/a	30.8	11.5	Tympanum indistinct	Biju, S. D., I. Van Bocxlaer, V. B. Giri, S. P. Loader, and F. Bossuyt. 2009. Two new endemic genera and a new species of toad (Anura: Bufonidae) from the Western Ghats of India. BMC Research Notes 2 (241): 1–10.	n/a	n/a	No	Biju, S. D., I. Van Bocxlaer, V. B. Giri, S. P. Loader, and F. Bossuyt. 2009. Two new endemic genera and a new species of toad (Anura: Bufonidae) from the Western Ghats of India. BMC Research Notes 2 (241): 1–10.
Hyloidea	Bufonidae	Blaira	Blaira rubigina	n/a	40.5	18	2	Pillai, R. S., and R. Pattabiraman. "A new species of torrent toad (genus: Ansonia) from silent valley, s. India." Proceedings: Animal Sciences 90.2 (1981): 203-208.	n/a	n/a	YES	Pillai, R. S., and R. Pattabiraman. "A new species of torrent toad (genus: Ansonia) from silent valley, s. India." Proceedings: Animal Sciences 90.2 (1981): 203-208.
Hyloidea	Bufonidae	Blythophryne	Blythophryne beryet	n/a	25.5	9.4	1.9	Chandramouli, S. R., et al. "A new genus and species of arboreal toad with phytotelmonous larvae, from the Andaman Islands, India (Lissamphibia, Anura, Bufonidae)." ZooKeys 555 (2016): 57.	n/a	n/a	No	Chandramouli, S. R., et al. "A new genus and species of arboreal toad with phytotelmonous larvae, from the Andaman Islands, India (Lissamphibia, Anura, Bufonidae)." ZooKeys 555 (2016): 57.
Hyloidea	Bufonidae	Bufo	Bufo bufo	ZUEC-AMP 16846	84.88	31.03	2.96		949.05	James, Taylor, Hunter, Ryan. 2021. Evolutionary and allometric insights into anuran auditory sensitivity and morphology. Brain, Behavior and Evolution.	No	Savage, R. Maxwell. "The Breeding Behaviour of the Common Frog, Rana temporaria temporaria Linn., and of the Common Toad, Bufo bufo bufo Linn." Proceedings of the Zoological Society of London. Vol. 104. No. 1. Oxford, UK: Blackwell Publishing Ltd, 1934.
Hyloidea	Bufonidae	Bufo	Bufo eichwaldi	n/a	71.2	28.2	3.7	Litvinchuk, Spartak N., et al. "A new species of common toads from the Talysh mountains, south-eastern Caucasus: genome size, allozyme, and morphological evidences." Russian Journal of Herpetology 15.1 (2008): 19-43.	n/a	n/a	No	Litvinchuk, Spartak N., et al. "A new species of common toads from the Talysh mountains, south-eastern Caucasus: genome size, allozyme, and morphological evidences." Russian Journal of Herpetology 15.1 (2008): 19-43.
Hyloidea	Bufonidae	Bufo	Bufo formosus	n/a	113	43.2	7.8	Matsui, Masafumi. "Morphometric variation analyses and revision of the Japanese toads (Genus Bufo, Bufonidae)." (1984).	n/a	n/a	No	Ishii, Susumu, et al. "Orientation of the toad, Bufo japonicus, toward the breeding pond." Zoological science 12.4 (1995): 475-484.
Hyloidea	Bufonidae	Bufo	Bufo gargarizans	ZUEC-AMP 21770	65.01	24.36	2.59		n/a	n/a	No	Yu, Tonglei, Yanshu Guo, and Xin Lu. "Habitat selection of Asiatic toad, Bufo gargarizans (Cantor, 1842), in southwestern China." Russian journal of ecology 41.2 (2010): 192-196.
Hyloidea	Bufonidae	Bufotes	Bufotes baturae	n/a	58.2	22.3	2.7	Stöck, Matthias, et al. "Mosaicism in somatic triploid specimens of the Bufo viridis complex in the Karakoram with examination of calls, morphology and taxonomic conclusions." (1999): 215-232.	n/a	n/a	n/a	n/a
Hyloidea	Bufonidae	Bufotes	Bufotes viridis	n/a	76.5	n/a	5.22	James, Taylor, Hunter, Ryan. 2021. Evolutionary and allometric insights into anuran auditory sensitivity and morphology. Brain, Behavior and Evolution.	1507.38	James, Taylor, Hunter, Ryan. 2021. Evolutionary and allometric insights into anuran auditory sensitivity and morphology. Brain, Behavior and Evolution.	n/a	n/a
Hyloidea	Bufonidae	Capensibufo	Capensibufo magistratus	n/a	19.6	n/a	Tympanum indistinct	Channing, A., G. J. Measey, A. L. De Villiers, A. A. Turner, and K. A. Tolley. 2017. Taxonomy of the Capensibufo rosei group (Anura: Bufonidae) from South Africa. Zootaxa 4232: 282–292.	Mute species	Channing, A., G. J. Measey, A. L. De Villiers, A. A. Turner, and K. A. Tolley. 2017. Taxonomy of the Capensibufo rosei group (Anura: Bufonidae) from South Africa. Zootaxa 4232: 282–292.	n/a	n/a
Hyloidea	Bufonidae	Dendrophryniscus	Dendrophryniscus berthalutzae	n/a	20	8.4	Tympanum indistinct	Izecksohn, E. 1994 "1993". Três novas espécies de Dendrophryniscus Jiménez de la Espada das regiões sudeste e sul do Brasil (Amphibia, Anura, Bufonidae). Revista Brasileira de Zoologia 10: 473–488.	n/a	n/a	No	Izecksohn, E. 1994 "1993". Três novas espécies de Dendrophryniscus Jiménez de la Espada das regiões sudeste e sul do Brasil (Amphibia, Anura, Bufonidae). Revista Brasileira de Zoologia 10: 473–488.
Hyloidea	Bufonidae	Duttaphrynus	Duttaphrynus crocus	n/a	56.53	20.9	2.43	Wogan, Guinevere OU, et al. "A new species of Bufo (Anura: Bufonidae) from Myanmar (Burma), and redescription of the little known species Bufo stuarti Smith 1929." Proceedings of the California Academy of Sciences 54.7 (2003): 141-153.	n/a	n/a	No	Wogan, Guinevere OU, et al. "A new species of Bufo (Anura: Bufonidae) from Myanmar (Burma), and redescription of the little known species Bufo stuarti Smith 1929." Proceedings of the California Academy of Sciences 54.7 (2003): 141-153.
Hyloidea	Bufonidae	Duttaphrynus	Duttaphrynus melanostictus	n/a	77.88	29.94	5.03	Wogan, Guinevere OU, et al. "A new species of Bufo (Anura: Bufonidae) from Myanmar (Burma), and redescription of the little known species Bufo stuarti Smith 1929." Proceedings of the California Academy of Sciences 54.7 (2003): 141-153.	1312.7	Tonini, João Filipe Riva, et al. "Allometric escape from acoustic constraints is rare for frog calls." Ecology and Evolution 10.8 (2020): 3686-3695.	No	Wogan, Guinevere OU, et al. "A new species of Bufo (Anura: Bufonidae) from Myanmar (Burma), and redescription of the little known species Bufo stuarti Smith 1929." Proceedings of the California Academy of Sciences 54.7 (2003): 141-153.
Hyloidea	Bufonidae	Duttaphrynus	Duttaphrynus scaber	n/a	27.5	n/a	1.4	Bogert, Charles Mitchill, and Ranil Senanayake. "A new species of toad (Bufo) indigenous to southern Ceylon. American Museum novitates; no. 2269." (1966).	n/a	n/a	No	Bogert, Charles Mitchill, and Ranil Senanayake. "A new species of toad (Bufo) indigenous to southern Ceylon. American Museum novitates; no. 2269." (1966).
Hyloidea	Bufonidae	Duttaphrynus	Duttaphrynus stuarti	n/a	60.7	25.8	2.2	Wogan, Guinevere OU, et al. "A new species of Bufo (Anura: Bufonidae) from Myanmar (Burma), and redescription of the little known species Bufo stuarti Smith 1929." Proceedings of the California Academy of Sciences 54.7 (2003): 141-153.	n/a	n/a	n/a	n/a
Hyloidea	Bufonidae	Epidalea	Epidalea calamita	ZUEC-AMP 21692	51.27	16.13	2.17		n/a	n/a	n/a	n/a
Hyloidea	Bufonidae	Frostius	Frostius erythrophthalmus	ZUEC-AMP 16697	21.71	8.64	1.35		3070	Tonini, João Filipe Riva, et al. "Allometric escape from acoustic constraints is rare for frog calls." Ecology and Evolution 10.8 (2020): 3686-3695.	No	Haddad, C. F. B., Toledo, L. F., Prado, C. P. A., Loebmann, D., Gasparini, J. L., Sazima, I. 2013. Guia dos Anfíbios da Mata Atlântica - Diversidade e Biologia / Guide to the Amphibians of the Atlantic Forest: Diversity and Biology. Anolis Books Editora, 1st Edition. São Paulo, Brazil. 550p.
Hyloidea	Bufonidae	Frostius	Frostius erythrophthalmus	ZUEC 16697	21.71	8.64	1.35		3070	Tonini, J. F. R., Provete, D. B., Maciel, N. M., Morais, A. R., Goutte, S., Toledo, L. F., & Pyron, R. A. (2020). Allometric escape from acoustic constraints is rare for frog calls. Ecology and evolution, 10(8), 3686-3695.	No	Haddad, C. F. B., Toledo, L. F., Prado, C. P. A., Loebmann, D., Gasparini, J. L., Sazima, I. 2013. Guia dos Anfíbios da Mata Atlântica - Diversidade e Biologia / Guide to the Amphibians of the Atlantic Forest: Diversity and Biology. Anolis Books Editora, 1st Edition. São Paulo, Brazil. 550p.
Hyloidea	Bufonidae	Frostius	Frostius erythrophthalmus	ZUEC-AMP 16631	27.36	9.56	1.68		n/a	n/a	n/a	n/a
Hyloidea	Bufonidae	Frostius	Frostius erythrophthalmus	ZUEC-AMP 16632	21.42	9.57	1.22		n/a	n/a	n/a	n/a
Hyloidea	Bufonidae	Frostius	Frostius erythrophthalmus	ZUEC-AMP 16633	19.95	8.28	1.8		n/a	n/a	n/a	n/a
Hyloidea	Bufonidae	Frostius	Frostius erythrophthalmus	ZUEC-AMP 16696	21.94	8.46	1.5		n/a	n/a	n/a	n/a
Hyloidea	Bufonidae	Frostius	Frostius erythrophthalmus	ZUEC-AMP 16699	22.14	8.6	1.17		n/a	n/a	n/a	n/a
Hyloidea	Bufonidae	Frostius	Frostius pernambucensis	ZUEC-AMP 3559	21.1	8.69	1.4		2360	Tonini, João Filipe Riva, et al. "Allometric escape from acoustic constraints is rare for frog calls." Ecology and Evolution 10.8 (2020): 3686-3695.	No	Haddad, C. F. B., Toledo, L. F., Prado, C. P. A., Loebmann, D., Gasparini, J. L., Sazima, I. 2013. Guia dos Anfíbios da Mata Atlântica - Diversidade e Biologia / Guide to the Amphibians of the Atlantic Forest: Diversity and Biology. Anolis Books Editora, 1st Edition. São Paulo, Brazil. 550p.
Hyloidea	Bufonidae	Frostius	Frostius pernambucensis	ZUEC-AMP 3545	22.92	9.16	1.2		n/a	n/a	n/a	n/a
Hyloidea	Bufonidae	Incilius	Incilius aucoinae	n/a	52.5	25	2.7	O'Neill, Eric M., and Joseph R. Mendelson. "Taxonomy of Costa Rican toads referred to Bufo melanochlorus Cope, with the description of a new species." Journal of Herpetology 38.4 (2004): 487-495.	n/a	n/a	No	Klank, Jeremy, Gerardo Chaves, and Erick Arias. "Range expansion of the Gulf Coast Toad, Incilius valliceps (Wiegmann, 1833)(Anura, Bufonidae), from Costa Rica." Check List 16 (2020): 753.
Hyloidea	Bufonidae	Incilius	Incilius aurarius	n/a	60	26.2	3.5	Mendelson, Joseph R., et al. "A new golden toad (Bufonidae: Incilius) from northwestern Guatemala and Chiapas, Mexico." Journal of Herpetology 46.4 (2012): 473-480.	n/a	n/a	No	Mendelson, Joseph R., et al. "A new golden toad (Bufonidae: Incilius) from northwestern Guatemala and Chiapas, Mexico." Journal of Herpetology 46.4 (2012): 473-480.
Hyloidea	Bufonidae	Incilius	Incilius cavifrons	n/a	70	28.2	3.4	Mendelson III, Joseph R. "A new species of toad (Anura: Bufonidae) from Oaxaca, Mexico with comments on the status of Bufo cavifrons and Bufo cristatus." Herpetologica (1997): 268-286.	n/a	n/a	YES	Mendelson III, Joseph R. "A new species of toad (Anura: Bufonidae) from Oaxaca, Mexico with comments on the status of Bufo cavifrons and Bufo cristatus." Herpetologica (1997): 268-286.
Hyloidea	Bufonidae	Incilius	Incilius coccifer	n/a	51.4	18.3	2.3	Mendelson III, Joseph R., et al. "Systematics of the Bufo coccifer complex (Anura: Bufonidae) of Mesoamerica." (2005).	2512	Tonini, João Filipe Riva, et al. "Allometric escape from acoustic constraints is rare for frog calls." Ecology and Evolution 10.8 (2020): 3686-3695.	n/a	n/a
Hyloidea	Bufonidae	Incilius	Incilius coniferus	ZUEC-AMP 23348	82.44	38.8	3.53		903	Tonini, João Filipe Riva, et al. "Allometric escape from acoustic constraints is rare for frog calls." Ecology and Evolution 10.8 (2020): 3686-3695.	No	Porter, Kenneth R. "Mating calls of six Mexican and Central American toads (genus Bufo)." Herpetologica 22.1 (1966): 60-67.
Hyloidea	Bufonidae	Incilius	Incilius cristatus	n/a	52.9	20.1	2.1	Mendelson III, Joseph R. "A new species of toad (Anura: Bufonidae) from Oaxaca, Mexico with comments on the status of Bufo cavifrons and Bufo cristatus." Herpetologica (1997): 268-286.	n/a	n/a	No	Oropeza-Sánchez, MARCO TULIO, Eduardo Pineda, and R. I. C. A. R. D. O. Luría-Manzano. "Population characteristics, habitat, and diet of the large-Crested toad (IncilIus cristatus; Anura: Bufonidae): a Critically endangered species endemic to Mexico." Herpetological Conservation and Biology 13.3 (2018): 558-568.
Hyloidea	Bufonidae	Incilius	Incilius ibarrai	n/a	62.2	24.1	3.7	Mendelson III, Joseph R., et al. "Systematics of the Bufo coccifer complex (Anura: Bufonidae) of Mesoamerica." (2005).	1700	Tonini, João Filipe Riva, et al. "Allometric escape from acoustic constraints is rare for frog calls." Ecology and Evolution 10.8 (2020): 3686-3695.	No	Mendelson III, Joseph R., et al. "Systematics of the Bufo coccifer complex (Anura: Bufonidae) of Mesoamerica." (2005).
Hyloidea	Bufonidae	Incilius	Incilius karenlipsae	n/a	89.3	32.9	5.7	MENDELSON III, JOSEPH R., and Daniel G. Mulcahy. "A new species of toad (Bufonidae: Incilius) from central Panama." Zootaxa 2396.1 (2010): 61-68.	n/a	n/a	No	MENDELSON III, JOSEPH R., and Daniel G. Mulcahy. "A new species of toad (Bufonidae: Incilius) from central Panama." Zootaxa 2396.1 (2010): 61-68.
Hyloidea	Bufonidae	Incilius	Incilius leucomyos	n/a	62.1	27.5	3.5	McCranie, James R., and Larry David Wilson. "A new species of high-crested toad of the Bufo valliceps group from north-central Honduras." Journal of Herpetology (2000): 21-31.	n/a	n/a	No	McCranie, James R., and Larry David Wilson. "A new species of high-crested toad of the Bufo valliceps group from north-central Honduras." Journal of Herpetology (2000): 21-31.
Hyloidea	Bufonidae	Incilius	Incilius macrocristatus	n/a	59.4	25.8	3.2	Mendelson, Joseph R., et al. "A new golden toad (Bufonidae: Incilius) from northwestern Guatemala and Chiapas, Mexico." Journal of Herpetology 46.4 (2012): 473-480.	n/a	n/a	n/a	n/a
Hyloidea	Bufonidae	Incilius	Incilius mccoyi	n/a	57.48	21.68	2.77	Santos-Barrera, G., and O. Flores Villela. "A new species of toad of the genus Incilius from the Sierra Madre Occidental of Chihuahua, Mexico (Anura: Bufonidae)." Journal of Herpetology 45.2 (2011): 211-216.	n/a	n/a	YES
Hyloidea	Bufonidae	Incilius	Incilius melanochlorus	n/a	68.6	32.4	2.9	O'Neill, Eric M., and Joseph R. Mendelson. "Taxonomy of Costa Rican toads referred to Bufo melanochlorus Cope, with the description of a new species." Journal of Herpetology 38.4 (2004): 487-495.	1700	Tonini, João Filipe Riva, et al. "Allometric escape from acoustic constraints is rare for frog calls." Ecology and Evolution 10.8 (2020): 3686-3695.	n/a	n/a
Hyloidea	Bufonidae	Incilius	Incilius pisinnus	n/a	45.9	15.9	2.3	Mendelson III, Joseph R., et al. "Systematics of the Bufo coccifer complex (Anura: Bufonidae) of Mesoamerica." (2005).	n/a	n/a	No	Mendelson III, Joseph R., et al. "Systematics of the Bufo coccifer complex (Anura: Bufonidae) of Mesoamerica." (2005).
Hyloidea	Bufonidae	Incilius	Incilius porteri	n/a	49.6	18.4	3	Mendelson III, Joseph R., et al. "Systematics of the Bufo coccifer complex (Anura: Bufonidae) of Mesoamerica." (2005).	n/a	n/a	No	Mendelson III, Joseph R., et al. "Systematics of the Bufo coccifer complex (Anura: Bufonidae) of Mesoamerica." (2005).
Hyloidea	Bufonidae	Incilius	Incilius signifer	n/a	51.2	17.9	3.1	Mendelson III, Joseph R., et al. "Systematics of the Bufo coccifer complex (Anura: Bufonidae) of Mesoamerica." (2005).	n/a	n/a	No	Mendelson III, Joseph R., et al. "Systematics of the Bufo coccifer complex (Anura: Bufonidae) of Mesoamerica." (2005).
Hyloidea	Bufonidae	Incilius	Incilius spiculatus	n/a	67.8	27.4	3	Mendelson III, Joseph R. "A new species of toad (Anura: Bufonidae) from Oaxaca, Mexico with comments on the status of Bufo cavifrons and Bufo cristatus." Herpetologica (1997): 268-286.	n/a	n/a	No	Mendelson III, Joseph R. "A new species of toad (Anura: Bufonidae) from Oaxaca, Mexico with comments on the status of Bufo cavifrons and Bufo cristatus." Herpetologica (1997): 268-286.
Hyloidea	Bufonidae	Ingerophrynus	Ingerophrynus gollum	n/a	26.7	12.7	2	Grismer, L. Lee. "A new species of Ingerophrynus (Anura: Bufonidae) from a lowland rain forest in southern Peninsular Malaysia." Journal of Herpetology 41.2 (2007): 225-231.	n/a	n/a	No	Grismer, L. Lee. "A new species of Ingerophrynus (Anura: Bufonidae) from a lowland rain forest in southern Peninsular Malaysia." Journal of Herpetology 41.2 (2007): 225-231.
Hyloidea	Bufonidae	Leptophryne	Leptophryne borbonica	n/a	23.8	14.1	1.2	Hamidy, A. M. I. R., et al. "Detection of Cryptic taxa in the genus Leptophryne (Fitzinger, 1843)(Amphibia; Bufonidae) and the description of a new species from Java, Indonesia." Zootaxa 4450.4 (2018): 427-444.	n/a	n/a	n/a	n/a
Hyloidea	Bufonidae	Leptophryne	Leptophryne cruentata	n/a	25.1	12.4	0.7	Hamidy, A. M. I. R., et al. "Detection of Cryptic taxa in the genus Leptophryne (Fitzinger, 1843)(Amphibia; Bufonidae) and the description of a new species from Java, Indonesia." Zootaxa 4450.4 (2018): 427-444.	n/a	n/a	n/a	n/a
Hyloidea	Bufonidae	Leptophryne	Leptophryne javanica	n/a	23	12	0.7	Hamidy, A. M. I. R., et al. "Detection of Cryptic taxa in the genus Leptophryne (Fitzinger, 1843)(Amphibia; Bufonidae) and the description of a new species from Java, Indonesia." Zootaxa 4450.4 (2018): 427-444.	n/a	n/a	n/a	n/a
Hyloidea	Bufonidae	Melanophryniscus	Melanophryniscus admirabilis	n/a	35.53	13.91	Tympanum indistinct	Di-Bernardo, Marcos, Raúl Maneyro, and Hamilton Grillo. "New species of Melanophryniscus (anura: bufonidae) from Rio grande do sul, southern brazil." Journal of herpetology40.2 (2006): 261-266.	n/a	n/a	YES	Di-Bernardo, Marcos, Raúl Maneyro, and Hamilton Grillo. "New species of Melanophryniscus (anura: bufonidae) from Rio grande do sul, southern brazil." Journal of herpetology40.2 (2006): 261-266.
Hyloidea	Bufonidae	Mertensophryne	Mertensophryne howelli	n/a	30.8	n/a	Tympanum indistinct	Poynton, John C., and Barry T. Clarke. "Two new species of Stephopaedes (Anura: Bufonidae) from Tanzania, with a review of the genus." African Journal of Herpetology 48.1-2 (1999): 1-14.	n/a	n/a	No	Poynton, John C., and Barry T. Clarke. "Two new species of Stephopaedes (Anura: Bufonidae) from Tanzania, with a review of the genus." African Journal of Herpetology 48.1-2 (1999): 1-14.
Hyloidea	Bufonidae	Nannophryne	Nannophryne corynetes	n/a	45.9	15.5	Tympanum indistinct	Duellman, William E., and Oscar Ochoa. "A new species of Bufo (Anura: Bufonidae) from the Andes of southern Peru." Copeia (1991): 137-141.	n/a	n/a	No	Duellman, William E., and Oscar Ochoa. "A new species of Bufo (Anura: Bufonidae) from the Andes of southern Peru." Copeia (1991): 137-141.
Hyloidea	Bufonidae	Nectophrynoides	Nectophrynoides poyntoni	n/a	21.5	9.5	2.77	Menegon, M., Salvidio, S., & Loader, S. P. (2004). Five new species of Nectophrynoides Noble 1926 (Amphibia anura bufonidae) from the Eastern Arc Mountains, Tanzania. Tropical Zoology, 17(1), 97–121.	2890	Menegon, M., Salvidio, S., & Loader, S. P. (2004). Five new species of Nectophrynoides Noble 1926 (Amphibia anura bufonidae) from the Eastern Arc Mountains, Tanzania. Tropical Zoology, 17(1), 97–121.	YES	Menegon, M., Salvidio, S., & Loader, S. P. (2004). Five new species of Nectophrynoides Noble 1926 (Amphibia anura bufonidae) from the Eastern Arc Mountains, Tanzania. Tropical Zoology, 17(1), 97–121.
Hyloidea	Bufonidae	Nectophrynoides	Nectophrynoides tornieri	n/a	23.1	n/a	n/a		3290	Menegon, M., Salvidio, S., & Loader, S. P. (2004). Five new species of Nectophrynoides Noble 1926 (Amphibia anura bufonidae) from the Eastern Arc Mountains, Tanzania. Tropical Zoology, 17(1), 97–121.	YES	Starnberger, I., Kamminga, P., Fosah, V. C., & Nuttman, C. (2011). The ‘push-up’ as a calling posture in nectophrynoides tornieri (Anura: Bufonidae) in the amani nature reserve, tanzania. Herpetologica, 67(2), 124–134.
Hyloidea	Bufonidae	Oreophrynella	Oreophrynella seegobini	IRSNB1979	20	7.8	Tympanum indistinct	Kok, P. J. R. 2009. A new species of Oreophrynella (Anura: Bufonidae) from the Pantepui region of Guyana, with notes on O. macconnelli Boulenger, 1900. Zootaxa 2071: 35–49.	n/a	n/a	No	Kok, P. J. R. 2009. A new species of Oreophrynella (Anura: Bufonidae) from the Pantepui region of Guyana, with notes on O. macconnelli Boulenger, 1900. Zootaxa 2071: 35–49.
Hyloidea	Bufonidae	Osornophryne	Osornophryne angel	n/a	29.8	8.7	Tympanum indistinct		n/a	n/a	No	Yánez-Muñoz, M. H., M. Altamirano-Benavides, D. F. Cisneros-Heredia, and A. G. Gluesenkamp. 2011 "2010". Nueva especie de Sapo Andino del género Osornophryne (Amphibia: Bufonidae) del norte de Ecuador, con notas sobre la diversidad del género en Colombia. Avances en Ciencias e Ingeníerias. Sección B. Quito 2 (3): B46–B53.
Hyloidea	Bufonidae	Pelophryne	Pelophryne ingeri	n/a	16.7	n/a	5.6	Matsui, M. 2019. A new species of Pelophryne from Malay Peninsular (Anura, Bufonidae). Current Herpetology. Kyoto 38: 128–139.	6630	Matsui, M. 2019. A new species of Pelophryne from Malay Peninsular (Anura, Bufonidae). Current Herpetology. Kyoto 38: 128–139.	No	Matsui, M. 2019. A new species of Pelophryne from Malay Peninsular (Anura, Bufonidae). Current Herpetology. Kyoto 38: 128–139.
Hyloidea	Bufonidae	Peltophryne	Peltophryne armata	n/a	75	24.6	3.1	MIGUEL, A. LANDESTOY T., B. DANIEL, and B. ANGELA. "A new species of Caribbean toad (Bufonidae, Peltophryne) from southern Hispaniola." Zootaxa 4403.3 (2018): 523-539.	1200	MIGUEL, A. LANDESTOY T., B. DANIEL, and B. ANGELA. "A new species of Caribbean toad (Bufonidae, Peltophryne) from southern Hispaniola." Zootaxa 4403.3 (2018): 523-539.	No	MIGUEL, A. LANDESTOY T., B. DANIEL, and B. ANGELA. "A new species of Caribbean toad (Bufonidae, Peltophryne) from southern Hispaniola." Zootaxa 4403.3 (2018): 523-539.
Hyloidea	Bufonidae	Peltophryne	Peltophryne florentinoi	n/a	102.7	34.7	5.9	Moreno, Luis V., and E. V. Rivalta. "Especie nueva de sapo del género Bufo (Anura: Bufonidae) de la Península de Zapata, Cuba." Solenodon 6 (2007): 60-69.	760	Tonini, João Filipe Riva, et al. "Allometric escape from acoustic constraints is rare for frog calls." Ecology and Evolution 10.8 (2020): 3686-3695.	No	Moreno, Luis V., and E. V. Rivalta. "Especie nueva de sapo del género Bufo (Anura: Bufonidae) de la Península de Zapata, Cuba." Solenodon 6 (2007): 60-69.
Hyloidea	Bufonidae	Peltophryne	Peltophryne fustiger	n/a	117.8	42.7	5.7	Moreno, Luis V., and E. V. Rivalta. "Especie nueva de sapo del género Bufo (Anura: Bufonidae) de la Península de Zapata, Cuba." Solenodon 6 (2007): 60-69.	712	Tonini, João Filipe Riva, et al. "Allometric escape from acoustic constraints is rare for frog calls." Ecology and Evolution 10.8 (2020): 3686-3695.	No	Alonso, Roberto, and Ariel Rodríguez. "Advertisement calls of Cuban toads of the genus Bufo (Anura, Bufonidae)." Phyllomedusa: Journal of Herpetology 2.2 (2003): 75-82.
Hyloidea	Bufonidae	Peltophryne	Peltophryne guentheri	n/a	62	21.4	3.2	MIGUEL, A. LANDESTOY T., B. DANIEL, and B. ANGELA. "A new species of Caribbean toad (Bufonidae, Peltophryne) from southern Hispaniola." Zootaxa 4403.3 (2018): 523-539.	1310	MIGUEL, A. LANDESTOY T., B. DANIEL, and B. ANGELA. "A new species of Caribbean toad (Bufonidae, Peltophryne) from southern Hispaniola." Zootaxa 4403.3 (2018): 523-539.	n/a	n/a
Hyloidea	Bufonidae	Peltophryne	Peltophryne peltocephala	n/a	114.1	43	5.9	Moreno, Luis V., and E. V. Rivalta. "Especie nueva de sapo del género Bufo (Anura: Bufonidae) de la Península de Zapata, Cuba." Solenodon 6 (2007): 60-69.	694	Tonini, João Filipe Riva, et al. "Allometric escape from acoustic constraints is rare for frog calls." Ecology and Evolution 10.8 (2020): 3686-3695.	No	Alonso, Roberto, and Ariel Rodríguez. "Advertisement calls of Cuban toads of the genus Bufo (Anura, Bufonidae)." Phyllomedusa: Journal of Herpetology 2.2 (2003): 75-82.
Hyloidea	Bufonidae	Poyntonophrynus	Poyntonophrynus kavangensis	NMZB 19074	26.5	8.7	1.2	Poynton, J. C., and D. G. Broadley. 1988. Amphibia Zambesiaca, 4. Bufonidae. Annals of the Natal Museum 29: 447–490.	n/a	n/a	No	Poynton, J. C., and D. G. Broadley. 1988. Amphibia Zambesiaca, 4. Bufonidae. Annals of the Natal Museum 29: 447–490.
Hyloidea	Bufonidae	Rhaebo	Rhaebo andinophrynoides	n/a	44.2	23.9	2.1	Mueses-Cisneros, Jonh Jairo. "Rhaebo haematiticus (Cope 1862): un complejo de especies. Con redescripción de Rhaebo hypomelas (Boulenger 1913) y descripción de una nueva especie." Herpetotropicos 5.1 (2009): 29-47.	n/a	n/a	No	Mueses-Cisneros, Jonh, Diego Cisneros-Heredia, and Roy W. McDiarmid. "A new Amazonian species of Rhaebo (Anura: Bufonidae) with comments on Rhaebo glaberrimus (Günther, 1869) and Rhaebo guttatus (Schneider, 1799)." Zootaxa(2012).
Hyloidea	Bufonidae	Rhaebo	Rhaebo ecuadorensis	n/a	95.5	34.9	5.9	Mueses-Cisneros, Jonh, Diego Cisneros-Heredia, and Roy W. McDiarmid. "A new Amazonian species of Rhaebo (Anura: Bufonidae) with comments on Rhaebo glaberrimus (Günther, 1869) and Rhaebo guttatus (Schneider, 1799)." Zootaxa(2012).	n/a	n/a	No	Mueses-Cisneros, Jonh, Diego Cisneros-Heredia, and Roy W. McDiarmid. "A new Amazonian species of Rhaebo (Anura: Bufonidae) with comments on Rhaebo glaberrimus (Günther, 1869) and Rhaebo guttatus (Schneider, 1799)." Zootaxa(2012).
Hyloidea	Bufonidae	Rhaebo	Rhaebo glaberrimus	n/a	57.1	24	3.5	Mueses-Cisneros, Jonh, Diego Cisneros-Heredia, and Roy W. McDiarmid. "A new Amazonian species of Rhaebo (Anura: Bufonidae) with comments on Rhaebo glaberrimus (Günther, 1869) and Rhaebo guttatus (Schneider, 1799)." Zootaxa(2012).	n/a	n/a	n/a	n/a
Hyloidea	Bufonidae	Rhaebo	Rhaebo guttatus	ZUEC-AMP 14982	93.36	39.21	2.9		1080	Tonini, João Filipe Riva, et al. "Allometric escape from acoustic constraints is rare for frog calls." Ecology and Evolution 10.8 (2020): 3686-3695.	n/a	n/a
Hyloidea	Bufonidae	Rhaebo	Rhaebo haematiticus	n/a	75.1	37.1	3.5	Mueses-Cisneros, Jonh Jairo. "Rhaebo haematiticus (Cope 1862): un complejo de especies. Con redescripción de Rhaebo hypomelas (Boulenger 1913) y descripción de una nueva especie." Herpetotropicos 5.1 (2009): 29-47.	2283	Tonini, João Filipe Riva, et al. "Allometric escape from acoustic constraints is rare for frog calls." Ecology and Evolution 10.8 (2020): 3686-3695.	No	Mueses-Cisneros, Jonh, Diego Cisneros-Heredia, and Roy W. McDiarmid. "A new Amazonian species of Rhaebo (Anura: Bufonidae) with comments on Rhaebo glaberrimus (Günther, 1869) and Rhaebo guttatus (Schneider, 1799)." Zootaxa(2012).
Hyloidea	Bufonidae	Rhaebo	Rhaebo hypomelas	n/a	70.7	34.4	3.6	Mueses-Cisneros, Jonh Jairo. "Rhaebo haematiticus (Cope 1862): un complejo de especies. Con redescripción de Rhaebo hypomelas (Boulenger 1913) y descripción de una nueva especie." Herpetotropicos 5.1 (2009): 29-47.	n/a	n/a	n/a	n/a
Hyloidea	Bufonidae	Rhaebo	Rhaebo lynchi	n/a	37.5	12.1	2.1	Mueses-Cisneros, Jonh Jairo. "A new species of Rhaebo (Anura: Bufonidae) from the Cordillera Occidental of Colombia." Zootaxa 1662.1 (2007): 53-59.	n/a	n/a	No	Mueses-Cisneros, Jonh Jairo. "A new species of Rhaebo (Anura: Bufonidae) from the Cordillera Occidental of Colombia." Zootaxa 1662.1 (2007): 53-59.
Hyloidea	Bufonidae	Rhinella	Rhinella achavali	ZUEC-AMP 3831	67.08	27.97	3.51		n/a	n/a	No	Haddad, C. F. B., Toledo, L. F., Prado, C. P. A., Loebmann, D., Gasparini, J. L., Sazima, I. 2013. Guia dos Anfíbios da Mata Atlântica - Diversidade e Biologia / Guide to the Amphibians of the Atlantic Forest: Diversity and Biology. Anolis Books Editora, 1st Edition. São Paulo, Brazil. 550p.
Hyloidea	Bufonidae	Rhinella	Rhinella acutirostris	ZUEC-AMP 8480	68.89	24.54	3.72		n/a	n/a	n/a	n/a
Hyloidea	Bufonidae	Rhinella	Rhinella acutirostris	ZUEC-AMP 10248	50.8	20.38	2.89		n/a	n/a	n/a	n/a
Hyloidea	Bufonidae	Rhinella	Rhinella acutirostris	ZUEC-AMP 11017	73.99	31.26	4.42		n/a	n/a	n/a	n/a
Hyloidea	Bufonidae	Rhinella	Rhinella amabilis	n/a	82.45	33.69	4.35	Pramuk, Jennifer B., and Fatemeh Kadivar. "A new species of Bufo (Anura: Bufonidae) from southern Ecuador." Herpetologica 59.2 (2003): 270-283.	n/a	n/a	n/a	n/a
Hyloidea	Bufonidae	Rhinella	Rhinella arenarum	ZUEC 1549	75.84	30.4	3.38	Bionda, C. D. L., Kost, S., Salas, N. E., Lajmanovich, R. C., Sinsch, U., & Martino, A. L. (2015). Age structure, growth and longevity in the common toad, Rhinella arenarum, from Argentina.	1250	Salas et al. 1998	n/a	n/a
Hyloidea	Bufonidae	Rhinella	Rhinella arenarum	ZUEC-AMP 1549	76.36	31.48	3.44		n/a	n/a	n/a	n/a
Hyloidea	Bufonidae	Rhinella	Rhinella arenarum	ZUEC-AMP 1551	64.03	24.42	3.7		n/a	n/a	n/a	n/a
Hyloidea	Bufonidae	Rhinella	Rhinella arenarum	ZUEC-AMP 5301	91.73	34.74	3.97		n/a	n/a	n/a	n/a
Hyloidea	Bufonidae	Rhinella	Rhinella arenarum	ZUEC-AMP 5301	92.06	35.3	4.26		n/a	n/a	n/a	n/a
Hyloidea	Bufonidae	Rhinella	Rhinella arenarum	ZUEC-AMP 6253	73.87	28.83	3.48		n/a	n/a	n/a	n/a
Hyloidea	Bufonidae	Rhinella	Rhinella arenarum	ZUEC-AMP 6258	75.17	28.69	3.27		n/a	n/a	n/a	n/a
Hyloidea	Bufonidae	Rhinella	Rhinella azarai	n/a	42.09	12.48	1.92	Narvaes, P., and M. T. Rodrigues. 2009. Taxonomic revision of Rhinella granulosa species group (Amphibia, Anura, Bufonidae), with a description of a new species. Arquivos de Zoologia. São Paulo 40: 1–73.	2499.3	Tonini, João Filipe Riva, et al. "Allometric escape from acoustic constraints is rare for frog calls." Ecology and Evolution 10.8 (2020): 3686-3695.	No	Guerra, C., Baldo, D., Rosset, S., Borteiro, C., & Kolenc, F. (2011). Advertisement and release calls in Neotropical toads of the Rhinella granulosa group and evidence of natural hybridization between R. bergi and R. major (Anura: Bufonidae). Zootaxa, 3092(1), 26-42.
Hyloidea	Bufonidae	Rhinella	Rhinella bergi	n/a	40.37	13.36	1.65	Narvaes, P., and M. T. Rodrigues. 2009. Taxonomic revision of Rhinella granulosa species group (Amphibia, Anura, Bufonidae), with a description of a new species. Arquivos de Zoologia. São Paulo 40: 1–73.	3828.8	Tonini, João Filipe Riva, et al. "Allometric escape from acoustic constraints is rare for frog calls." Ecology and Evolution 10.8 (2020): 3686-3695.	No	Guerra, C., Baldo, D., Rosset, S., Borteiro, C., & Kolenc, F. (2011). Advertisement and release calls in Neotropical toads of the Rhinella granulosa group and evidence of natural hybridization between R. bergi and R. major (Anura: Bufonidae). Zootaxa, 3092(1), 26-42.
Hyloidea	Bufonidae	Rhinella	Rhinella bernardoi	n/a	63.9	n/a	4.1	Sanabria, Eduardo, et al. "A new species of Rhinella (Anura: Bufonidae) from Ischigualasto Provincial Park, San Juan, Argentina." Zootaxa 2396.1 (2010): 50-60.	n/a	n/a	No	Sanabria, Eduardo, et al. "A new species of Rhinella (Anura: Bufonidae) from Ischigualasto Provincial Park, San Juan, Argentina." Zootaxa 2396.1 (2010): 50-60.
Hyloidea	Bufonidae	Rhinella	Rhinella casconi	n/a	78.8	33.4	4	Sanabria, Eduardo, et al. "A new species of Rhinella (Anura: Bufonidae) from Ischigualasto Provincial Park, San Juan, Argentina." Zootaxa 2396.1 (2010): 50-60.	911.6	Sanabria, Eduardo, et al. "A new species of Rhinella (Anura: Bufonidae) from Ischigualasto Provincial Park, San Juan, Argentina." Zootaxa 2396.1 (2010): 50-60.	No	Sanabria, Eduardo, et al. "A new species of Rhinella (Anura: Bufonidae) from Ischigualasto Provincial Park, San Juan, Argentina." Zootaxa 2396.1 (2010): 50-60.
Hyloidea	Bufonidae	Rhinella	Rhinella castaneotica	ZUEC-AMP 17142	23.65	8.2	0.74		1650	Tonini, João Filipe Riva, et al. "Allometric escape from acoustic constraints is rare for frog calls." Ecology and Evolution 10.8 (2020): 3686-3695.	n/a	n/a
Hyloidea	Bufonidae	Rhinella	Rhinella castaneotica	ZUEC-AMP 17138	31.89	11.51	2.5		n/a	n/a	n/a	n/a
Hyloidea	Bufonidae	Rhinella	Rhinella castaneotica	ZUEC-AMP 17139	24.79	8.88	0.89		n/a	n/a	n/a	n/a
Hyloidea	Bufonidae	Rhinella	Rhinella castaneotica	ZUEC-AMP 17140	31.64	11.63	1.59		n/a	n/a	n/a	n/a
Hyloidea	Bufonidae	Rhinella	Rhinella centralis	n/a	47.63	15.94	2.17	Narvaes, P., and M. T. Rodrigues. 2009. Taxonomic revision of Rhinella granulosa species group (Amphibia, Anura, Bufonidae), with a description of a new species. Arquivos de Zoologia. São Paulo 40: 1–73.	2591	Tonini, João Filipe Riva, et al. "Allometric escape from acoustic constraints is rare for frog calls." Ecology and Evolution 10.8 (2020): 3686-3695.	No	Guerra, C., Baldo, D., Rosset, S., Borteiro, C., & Kolenc, F. (2011). Advertisement and release calls in Neotropical toads of the Rhinella granulosa group and evidence of natural hybridization between R. bergi and R. major (Anura: Bufonidae). Zootaxa, 3092(1), 26-42.
Hyloidea	Bufonidae	Rhinella	Rhinella cerradensis	n/a	120.4	47.8	9	Maciel, Natan M., et al. "A large new species of Rhinella (Anura: Bufonidae) from Cerrado of Brazil." Zootaxa 1627.1 (2007): 23-39.	839	Maciel, Natan M., et al. "A large new species of Rhinella (Anura: Bufonidae) from Cerrado of Brazil." Zootaxa 1627.1 (2007): 23-39.	No	Maciel, Natan M., et al. "A large new species of Rhinella (Anura: Bufonidae) from Cerrado of Brazil." Zootaxa 1627.1 (2007): 23-39.
Hyloidea	Bufonidae	Rhinella	Rhinella chavin	n/a	52	16.5	3.4	Lehr, Edgar, et al. "New species of Bufo (Anura: Bufonidae) from central Peru." Copeia 2001.1 (2001): 216-223.	n/a	n/a	No	Lehr, Edgar, et al. "New species of Bufo (Anura: Bufonidae) from central Peru." Copeia 2001.1 (2001): 216-223.
Hyloidea	Bufonidae	Rhinella	Rhinella crucifer	ZUEC-AMP 8413	89.51	37.52	3.8		1344	Tonini, João Filipe Riva, et al. "Allometric escape from acoustic constraints is rare for frog calls." Ecology and Evolution 10.8 (2020): 3686-3695.	No	Haddad, C. F. B., Toledo, L. F., Prado, C. P. A., Loebmann, D., Gasparini, J. L., Sazima, I. 2013. Guia dos Anfíbios da Mata Atlântica - Diversidade e Biologia / Guide to the Amphibians of the Atlantic Forest: Diversity and Biology. Anolis Books Editora, 1st Edition. São Paulo, Brazil. 550p.
Hyloidea	Bufonidae	Rhinella	Rhinella crucifer	ZUEC-AMP 8413	89.04	39.05	3.65		n/a	n/a	n/a	n/a
Hyloidea	Bufonidae	Rhinella	Rhinella crucifer	ZUEC-AMP 8625	88.67	41.65	3.53		n/a	n/a	n/a	n/a
Hyloidea	Bufonidae	Rhinella	Rhinella crucifer	ZUEC-AMP 8626	88.68	41.41	3.67		n/a	n/a	n/a	n/a
Hyloidea	Bufonidae	Rhinella	Rhinella crucifer	ZUEC-AMP 21757	80.16	36.72	4.1		n/a	n/a	n/a	n/a
Hyloidea	Bufonidae	Rhinella	Rhinella crucifer	ZUEC-AMP 21757	80.04	37.21	4.54		n/a	n/a	n/a	n/a
Hyloidea	Bufonidae	Rhinella	Rhinella dapsilis	n/a	69.6	27.2	4.9	Vaz-Silva, Wilian, et al. "Revealing two new species of the Rhinella margaritifera species group (anura, bufonidae): an enigmatic taxonomic group of neotropical toads." Herpetologica 71.3 (2015): 212-222.	1298.8	Avila, Robson Waldemar, et al. "On Rhinella gildae Vaz-Silva, Maciel, Bastos Pombal 2015 (Anura: Bufonidae): Phylogenetic relationship, morphological variation, advertisement and release calls and geographic distribution." Zootaxa 4462.2 (2018): 274-290.	No	Avila, Robson Waldemar, et al. "On Rhinella gildae Vaz-Silva, Maciel, Bastos Pombal 2015 (Anura: Bufonidae): Phylogenetic relationship, morphological variation, advertisement and release calls and geographic distribution." Zootaxa 4462.2 (2018): 274-290.
Hyloidea	Bufonidae	Rhinella	Rhinella diptycha	ZUEC-AMP 17463	82.17	32.5	4.33		700	Tonini, João Filipe Riva, et al. "Allometric escape from acoustic constraints is rare for frog calls." Ecology and Evolution 10.8 (2020): 3686-3695.	No	Haddad, C. F. B., Toledo, L. F., Prado, C. P. A., Loebmann, D., Gasparini, J. L., Sazima, I. 2013. Guia dos Anfíbios da Mata Atlântica - Diversidade e Biologia / Guide to the Amphibians of the Atlantic Forest: Diversity and Biology. Anolis Books Editora, 1st Edition. São Paulo, Brazil. 550p.
Hyloidea	Bufonidae	Rhinella	Rhinella diptycha	ZUEC-AMP 2690	99.3	35.59	4.9		n/a	n/a	n/a	n/a
Hyloidea	Bufonidae	Rhinella	Rhinella diptycha	ZUEC-AMP 2690	100.29	35.97	3.92		n/a	n/a	n/a	n/a
Hyloidea	Bufonidae	Rhinella	Rhinella diptycha	ZUEC-AMP 5150	118.84	45.23	5.17		n/a	n/a	n/a	n/a
Hyloidea	Bufonidae	Rhinella	Rhinella diptycha	ZUEC-AMP 6224	74.02	33.96	3.92		n/a	n/a	n/a	n/a
Hyloidea	Bufonidae	Rhinella	Rhinella diptycha	ZUEC-AMP 8777	106.87	38.94	4.61		n/a	n/a	n/a	n/a
Hyloidea	Bufonidae	Rhinella	Rhinella diptycha	ZUEC-AMP 8777	106.74	39.08	4.19		n/a	n/a	n/a	n/a
Hyloidea	Bufonidae	Rhinella	Rhinella dorbignyi	ZUEC-AMP 10417	43.63	13.94	1.81		2044	Tonini, João Filipe Riva, et al. "Allometric escape from acoustic constraints is rare for frog calls." Ecology and Evolution 10.8 (2020): 3686-3695.	No	Haddad, C. F. B., Toledo, L. F., Prado, C. P. A., Loebmann, D., Gasparini, J. L., Sazima, I. 2013. Guia dos Anfíbios da Mata Atlântica - Diversidade e Biologia / Guide to the Amphibians of the Atlantic Forest: Diversity and Biology. Anolis Books Editora, 1st Edition. São Paulo, Brazil. 550p.
Hyloidea	Bufonidae	Rhinella	Rhinella dorbignyi	ZUEC-AMP 10437	57.1	16.38	1.6		2128.1	Tonini, João Filipe Riva, et al. "Allometric escape from acoustic constraints is rare for frog calls." Ecology and Evolution 10.8 (2020): 3686-3695.	No	Haddad, C. F. B., Toledo, L. F., Prado, C. P. A., Loebmann, D., Gasparini, J. L., Sazima, I. 2013. Guia dos Anfíbios da Mata Atlântica - Diversidade e Biologia / Guide to the Amphibians of the Atlantic Forest: Diversity and Biology. Anolis Books Editora, 1st Edition. São Paulo, Brazil. 550p.
Hyloidea	Bufonidae	Rhinella	Rhinella dorbignyi	ZUEC-AMP 1145	52.57	17.87	2.7		n/a	n/a	n/a	n/a
Hyloidea	Bufonidae	Rhinella	Rhinella dorbignyi	ZUEC-AMP 10419	57.04	20.22	2.13		n/a	n/a	n/a	n/a
Hyloidea	Bufonidae	Rhinella	Rhinella dorbignyi	ZUEC-AMP 10430	57.87	18.4	1.74		n/a	n/a	n/a	n/a
Hyloidea	Bufonidae	Rhinella	Rhinella dorbignyi	ZUEC-AMP 10430	57.96	19.9	1.9		n/a	n/a	n/a	n/a
Hyloidea	Bufonidae	Rhinella	Rhinella dorbignyi	ZUEC-AMP 10435	49.12	16.55	2.2		n/a	n/a	n/a	n/a
Hyloidea	Bufonidae	Rhinella	Rhinella dorbignyi	ZUEC-AMP 10436	57.85	19	2.6		n/a	n/a	n/a	n/a
Hyloidea	Bufonidae	Rhinella	Rhinella dorbignyi	ZUEC-AMP 10436	57.86	19.12	1.35		n/a	n/a	n/a	n/a
Hyloidea	Bufonidae	Rhinella	Rhinella gallardoi	n/a	81.45	n/a	3.55	Carrizo, Gustavo R. "Cuatro especies nuevas de anuros (Bufonidae: bufo e Hilydae: hyla) del norte de la Argentina." Cuadernos de Herpetología 7 (1992).	n/a	n/a	No	Carrizo, Gustavo R. "Cuatro especies nuevas de anuros (Bufonidae: bufo e Hilydae: hyla) del norte de la Argentina." Cuadernos de Herpetología 7 (1992).
Hyloidea	Bufonidae	Rhinella	Rhinella granulosa	ZUEC-AMP 3302	53.07	19.5	2.84		2906.36	Tonini, João Filipe Riva, et al. "Allometric escape from acoustic constraints is rare for frog calls." Ecology and Evolution 10.8 (2020): 3686-3695.	No	Haddad, C. F. B., Toledo, L. F., Prado, C. P. A., Loebmann, D., Gasparini, J. L., Sazima, I. 2013. Guia dos Anfíbios da Mata Atlântica - Diversidade e Biologia / Guide to the Amphibians of the Atlantic Forest: Diversity and Biology. Anolis Books Editora, 1st Edition. São Paulo, Brazil. 550p.
Hyloidea	Bufonidae	Rhinella	Rhinella granulosa	ZUEC-AMP 3288	55.88	20.86	2.28		n/a	n/a	n/a	n/a
Hyloidea	Bufonidae	Rhinella	Rhinella granulosa	ZUEC-AMP 3297	53.87	20.46	2.52		n/a	n/a	n/a	n/a
Hyloidea	Bufonidae	Rhinella	Rhinella hoogmoedi	ZUEC-AMP 9954	56.71	21.15	2.84		1341	Roberto, I. J., Brito, L., & Cascon, P. (2011). Temporal and spatial patterns of reproductive activity in Rhinella hoogmoedi (Anura: Bufonidae) from a tropical rainforest in northeastern brazil, with the description of it's advertisement call. South american Journal of herpetology, 6(2), 87-97.	No	Haddad, C. F. B., Toledo, L. F., Prado, C. P. A., Loebmann, D., Gasparini, J. L., Sazima, I. 2013. Guia dos Anfíbios da Mata Atlântica - Diversidade e Biologia / Guide to the Amphibians of the Atlantic Forest: Diversity and Biology. Anolis Books Editora, 1st Edition. São Paulo, Brazil. 550p.
Hyloidea	Bufonidae	Rhinella	Rhinella hoogmoedi	ZUEC-AMP 5732	55.01	20.59	3.17		n/a	n/a	n/a	n/a
Hyloidea	Bufonidae	Rhinella	Rhinella hoogmoedi	ZUEC-AMP 10046	53.05	20.19	3.13		n/a	n/a	n/a	n/a
Hyloidea	Bufonidae	Rhinella	Rhinella hoogmoedi	ZUEC-AMP 24649	53.27	21.83	2.84		n/a	n/a	n/a	n/a
Hyloidea	Bufonidae	Rhinella	Rhinella humboldti	ZUEC-AMP 9361	42.43	15.2	1.81		3150	Tonini, João Filipe Riva, et al. "Allometric escape from acoustic constraints is rare for frog calls." Ecology and Evolution 10.8 (2020): 3686-3695.	n/a	n/a
Hyloidea	Bufonidae	Rhinella	Rhinella icterica	ZUEC-AMP 6076	130.58	50.19	5.59		646	Tonini, João Filipe Riva, et al. "Allometric escape from acoustic constraints is rare for frog calls." Ecology and Evolution 10.8 (2020): 3686-3695.	No	Haddad, C. F. B., Toledo, L. F., Prado, C. P. A., Loebmann, D., Gasparini, J. L., Sazima, I. 2013. Guia dos Anfíbios da Mata Atlântica - Diversidade e Biologia / Guide to the Amphibians of the Atlantic Forest: Diversity and Biology. Anolis Books Editora, 1st Edition. São Paulo, Brazil. 550p.
Hyloidea	Bufonidae	Rhinella	Rhinella icterica	ZUEC-AMP 8405	123.22	46.69	4.96		n/a	n/a	n/a	n/a
Hyloidea	Bufonidae	Rhinella	Rhinella icterica	ZUEC-AMP 8408	116.84	48.15	4.61		n/a	n/a	n/a	n/a
Hyloidea	Bufonidae	Rhinella	Rhinella inopina	n/a	88.5	37.9	5.2	Vaz-Silva, Wilian, Paula Hanna Valdujo, and Jose P. Pombal Jr. "New species of the Rhinella crucifer group (Anura, Bufonidae) from the Brazilian Cerrado." Zootaxa 3265 (2012): 57.	1070	Tonini, João Filipe Riva, et al. "Allometric escape from acoustic constraints is rare for frog calls." Ecology and Evolution 10.8 (2020): 3686-3695.	No	VAZ-SILVA, WILIAN. Advertisement call of Rhinella inopina Vaz-Silva, Valdujo & Pombal, 2012 (Anura: Bufonidae) from the type-locality, northeastern Goiás State, Central Brazil. Zootaxa, v. 3931, n. 3, p. 448-450, 2015.
Hyloidea	Bufonidae	Rhinella	Rhinella lescurei	n/a	34.57	14.7	2.67	Fouquet, Antoine, et al. "Description of two new species of Rhinella (Anura: Bufonidae) from the lowlands of the Guiana shield." Zootaxa 1663.1 (2007): 17-32.	1160	Tonini, João Filipe Riva, et al. "Allometric escape from acoustic constraints is rare for frog calls." Ecology and Evolution 10.8 (2020): 3686-3695.	No	Fouquet, Antoine, et al. "Description of two new species of Rhinella (Anura: Bufonidae) from the lowlands of the Guiana shield." Zootaxa 1663.1 (2007): 17-32.
Hyloidea	Bufonidae	Rhinella	Rhinella magnussoni	n/a	40.4	14.6	2.7	Lima, Albertina P., Marcelo Menin, and M. C. Araújo. "A new species of Rhinella (Anura: Bufonidae) from Brazilian Amazon." Zootaxa 1663.1 (2007): 1-15.	2353.9	Lima, Albertina P., Marcelo Menin, and M. C. Araújo. "A new species of Rhinella (Anura: Bufonidae) from Brazilian Amazon." Zootaxa 1663.1 (2007): 1-15.	No	Lima, Albertina P., Marcelo Menin, and M. C. Araújo. "A new species of Rhinella (Anura: Bufonidae) from Brazilian Amazon." Zootaxa 1663.1 (2007): 1-15.
Hyloidea	Bufonidae	Rhinella	Rhinella major	ZUEC-AMP 7998	61.35	22.67	2.86		2960	Guerra, C., Baldo, D., Rosset, S., Borteiro, C., & Kolenc, F. (2011). Advertisement and release calls in Neotropical toads of the Rhinella granulosa group and evidence of natural hybridization between R. bergi and R. major (Anura: Bufonidae). Zootaxa, 3092(1), 26-42.	No	Guerra, C., Baldo, D., Rosset, S., Borteiro, C., & Kolenc, F. (2011). Advertisement and release calls in Neotropical toads of the Rhinella granulosa group and evidence of natural hybridization between R. bergi and R. major (Anura: Bufonidae). Zootaxa, 3092(1), 26-42.
Hyloidea	Bufonidae	Rhinella	Rhinella major	ZUEC-AMP 4061	57.47	22.65	2.63		n/a	n/a	n/a	n/a
Hyloidea	Bufonidae	Rhinella	Rhinella major	ZUEC-AMP 8001	60.16	21.69	3.19		n/a	n/a	n/a	n/a
Hyloidea	Bufonidae	Rhinella	Rhinella manu	n/a	32.3	12	2.5	Carlos Chaparro, Juan, Jennifer B. Pramuk, and Andrew G. Gluesenkamp. "A new species of arboreal Rhinella (Anura: Bufonidae) from cloud forest of southeastern Peru." Herpetologica 63.2 (2007): 203-212.	n/a	n/a	n/a	n/a
Hyloidea	Bufonidae	Rhinella	Rhinella margaritifera	n/a	52.33	21.33	4.33	Fouquet, Antoine, et al. "Description of two new species of Rhinella (Anura: Bufonidae) from the lowlands of the Guiana shield." Zootaxa 1663.1 (2007): 17-32.	1170	Tonini, João Filipe Riva, et al. "Allometric escape from acoustic constraints is rare for frog calls." Ecology and Evolution 10.8 (2020): 3686-3695.	No	Fouquet, Antoine, et al. "Description of two new species of Rhinella (Anura: Bufonidae) from the lowlands of the Guiana shield." Zootaxa 1663.1 (2007): 17-32.
Hyloidea	Bufonidae	Rhinella	Rhinella margaritifera	ZUEC-AMP 16003	64.14	26.11	3.87		1500	Tonini, João Filipe Riva, et al. "Allometric escape from acoustic constraints is rare for frog calls." Ecology and Evolution 10.8 (2020): 3686-3695.	n/a	n/a
Hyloidea	Bufonidae	Rhinella	Rhinella margaritifera	ZUEC-AMP 16049	67.47	27.78	4.7		n/a	n/a	n/a	n/a
Hyloidea	Bufonidae	Rhinella	Rhinella margaritifera	ZUEC-AMP 16061	67.32	27.5	3.54		n/a	n/a	n/a	n/a
Hyloidea	Bufonidae	Rhinella	Rhinella marina	ZUEC-AMP 7050	116.06	42.94	5.24		614	Tonini, João Filipe Riva, et al. "Allometric escape from acoustic constraints is rare for frog calls." Ecology and Evolution 10.8 (2020): 3686-3695.	No	Ward-Fear, G., Greenlees, M. J., & Shine, R. (2016). Toads on lava: spatial ecology and habitat use of invasive cane toads (Rhinella marina) in Hawai’i. PLoS One, 11(3), e0151700.
Hyloidea	Bufonidae	Rhinella	Rhinella marina	ZUEC-AMP 4358	140.05	54.56	5.83		n/a	n/a	n/a	n/a
Hyloidea	Bufonidae	Rhinella	Rhinella merianae	n/a	48.42	17.57	2.38	Narvaes, P., and M. T. Rodrigues. 2009. Taxonomic revision of Rhinella granulosa species group (Amphibia, Anura, Bufonidae), with a description of a new species. Arquivos de Zoologia. São Paulo 40: 1–73.	2315	Tonini, João Filipe Riva, et al. "Allometric escape from acoustic constraints is rare for frog calls." Ecology and Evolution 10.8 (2020): 3686-3695.	No	Guerra, C., Baldo, D., Rosset, S., Borteiro, C., & Kolenc, F. (2011). Advertisement and release calls in Neotropical toads of the Rhinella granulosa group and evidence of natural hybridization between R. bergi and R. major (Anura: Bufonidae). Zootaxa, 3092(1), 26-42.
Hyloidea	Bufonidae	Rhinella	Rhinella mirandaribeiroi	ZUEC-AMP 7456	50.93	17.5	2.65		2462.8	De Morais, A. R., Bastos, R. P., Annunziata, B. B., KOKUBUM, M. N. D. C., & Maciel, N. M. (2012). Description of the advertisement call of Rhinella mirandaribeiroi (Gallardo, 1965)(Anura: Bufonidae). Zootaxa, 3265(1), 66-68.	No	de Pina, Ligia Ferracine, Alessandro R. Morais, and Cynthia PA Prado. "Rhinella mirandaribeiroi (Gallardo, 1965)(Amphibia: Anura: Bufonidae): distribution extension and new state record." Check List 11.3 (2015): 1654.
Hyloidea	Bufonidae	Rhinella	Rhinella mirandaribeiroi	ZUEC-AMP 7790	51.65	18.73	3.2		n/a	n/a	n/a	n/a
Hyloidea	Bufonidae	Rhinella	Rhinella mirandaribeiroi	ZUEC-AMP 10198	51.27	17.18	2.48		n/a	n/a	n/a	n/a
Hyloidea	Bufonidae	Rhinella	Rhinella nattereri	n/a	52.77	19.3	2.23	Narvaes, P., and M. T. Rodrigues. 2009. Taxonomic revision of Rhinella granulosa species group (Amphibia, Anura, Bufonidae), with a description of a new species. Arquivos de Zoologia. São Paulo 40: 1–73.	n/a	n/a	n/a	n/a
Hyloidea	Bufonidae	Rhinella	Rhinella ocellata	ZUEC-AMP 7453	38.99	14.59	2.28		1378	Tonini, João Filipe Riva, et al. "Allometric escape from acoustic constraints is rare for frog calls." Ecology and Evolution 10.8 (2020): 3686-3695.	No	Caldwell, J. P., & Shepard, D. B. (2007). Calling site fidelity and call structure of a Neotropical toad, Rhinella ocellata (Anura: Bufonidae). Journal of Herpetology, 41(4), 611-621.
Hyloidea	Bufonidae	Rhinella	Rhinella ocellata	ZUEC-AMP 1195	44.59	16.91	2.97		n/a	n/a	n/a	n/a
Hyloidea	Bufonidae	Rhinella	Rhinella ocellata	ZUEC-AMP 7452	38.3	14.3	2.43		n/a	n/a	n/a	n/a
Hyloidea	Bufonidae	Rhinella	Rhinella ornata	ZUEC-AMP 4433	55.42	25.25	3.14		1286	Tonini, João Filipe Riva, et al. "Allometric escape from acoustic constraints is rare for frog calls." Ecology and Evolution 10.8 (2020): 3686-3695.	No	Haddad, C. F. B., Toledo, L. F., Prado, C. P. A., Loebmann, D., Gasparini, J. L., Sazima, I. 2013. Guia dos Anfíbios da Mata Atlântica - Diversidade e Biologia / Guide to the Amphibians of the Atlantic Forest: Diversity and Biology. Anolis Books Editora, 1st Edition. São Paulo, Brazil. 550p.
Hyloidea	Bufonidae	Rhinella	Rhinella ornata	ZUEC-AMP 822	64.23	28.33	3.72		1418.8	Tonini, João Filipe Riva, et al. "Allometric escape from acoustic constraints is rare for frog calls." Ecology and Evolution 10.8 (2020): 3686-3695.	No	Haddad, C. F. B., Toledo, L. F., Prado, C. P. A., Loebmann, D., Gasparini, J. L., Sazima, I. 2013. Guia dos Anfíbios da Mata Atlântica - Diversidade e Biologia / Guide to the Amphibians of the Atlantic Forest: Diversity and Biology. Anolis Books Editora, 1st Edition. São Paulo, Brazil. 550p.
Hyloidea	Bufonidae	Rhinella	Rhinella ornata	ZUEC-AMP 23056	63.75	29.74	3.74		n/a	n/a	n/a	n/a
Hyloidea	Bufonidae	Rhinella	Rhinella ornata	ZUEC-AMP 23309	63.93	30.24	4.65		n/a	n/a	n/a	n/a
Hyloidea	Bufonidae	Rhinella	Rhinella proboscidea	ZUEC-AMP 16636	32.35	13.1	0.95		1373	Tonini, João Filipe Riva, et al. "Allometric escape from acoustic constraints is rare for frog calls." Ecology and Evolution 10.8 (2020): 3686-3695.	n/a	n/a
Hyloidea	Bufonidae	Rhinella	Rhinella pygmaea	ZUEC-AMP 2919	39.5	13.5	1.65		2593	Tonini, João Filipe Riva, et al. "Allometric escape from acoustic constraints is rare for frog calls." Ecology and Evolution 10.8 (2020): 3686-3695.	No	Haddad, C. F. B., Toledo, L. F., Prado, C. P. A., Loebmann, D., Gasparini, J. L., Sazima, I. 2013. Guia dos Anfíbios da Mata Atlântica - Diversidade e Biologia / Guide to the Amphibians of the Atlantic Forest: Diversity and Biology. Anolis Books Editora, 1st Edition. São Paulo, Brazil. 550p.
Hyloidea	Bufonidae	Rhinella	Rhinella rumbolli	n/a	49.7	n/a	2.4	Carrizo, Gustavo R. "Cuatro especies nuevas de anuros (Bufonidae: bufo e Hilydae: hyla) del norte de la Argentina." Cuadernos de Herpetología 7 (1992).	n/a	n/a	No	Carrizo, Gustavo R. "Cuatro especies nuevas de anuros (Bufonidae: bufo e Hilydae: hyla) del norte de la Argentina." Cuadernos de Herpetología 7 (1992).
Hyloidea	Bufonidae	Rhinella	Rhinella scitula	n/a	47.5	16.3	2.4	Avila, Robson W., Andre Pansonato, and C. H. R. I. S. T. I. N. E. Strüssmann. "A new species of the Rhinella margaritifera group (Anura: Bufonidae) from Brazilian Pantanal." Zootaxa2339.1 (2010): 57-68.	1438.7	Tonini, João Filipe Riva, et al. "Allometric escape from acoustic constraints is rare for frog calls." Ecology and Evolution 10.8 (2020): 3686-3695.	No	Avila, Robson W., Andre Pansonato, and C. H. R. I. S. T. I. N. E. Strüssmann. "A new species of the Rhinella margaritifera group (Anura: Bufonidae) from Brazilian Pantanal." Zootaxa2339.1 (2010): 57-68.
Hyloidea	Bufonidae	Rhinella	Rhinella sclerocephala	n/a	61.2	26.7	4.1	Mijares-Urrutia, Abraham, and Alexis Arends. "A new toad of the Bufo margaritifer complex (Amphibia: Bufonidae) from northwestern Venezuela." Herpetologica (2001): 523-531.	n/a	n/a	No	Mijares-Urrutia, Abraham, and Alexis Arends. "A new toad of the Bufo margaritifer complex (Amphibia: Bufonidae) from northwestern Venezuela." Herpetologica (2001): 523-531.
Hyloidea	Bufonidae	Rhinella	Rhinella sebbeni	n/a	53.7	22.4	2.6	Vaz-Silva, Wilian, et al. "Revealing two new species of the Rhinella margaritifera species group (anura, bufonidae): an enigmatic taxonomic group of neotropical toads." Herpetologica 71.3 (2015): 212-222.	1266.15	Vaz-Silva, Wilian, et al. "Revealing two new species of the Rhinella margaritifera species group (anura, bufonidae): an enigmatic taxonomic group of neotropical toads." Herpetologica 71.3 (2015): 212-222.	No	Vaz-Silva, Wilian, et al. "Revealing two new species of the Rhinella margaritifera species group (anura, bufonidae): an enigmatic taxonomic group of neotropical toads." Herpetologica 71.3 (2015): 212-222.
Hyloidea	Bufonidae	Rhinella	Rhinella tacana	n/a	30.6	12.7	2	Padial, Jose M., et al. "A new species of arboreal toad (Anura: Bufonidae: Chaunus) from Madidi National Park, Bolivia." Zootaxa (2006).	n/a	n/a	No	Padial, Jose M., et al. "A new species of arboreal toad (Anura: Bufonidae: Chaunus) from Madidi National Park, Bolivia." Zootaxa (2006).
Hyloidea	Bufonidae	Rhinella	Rhinella veredas	n/a	98.3	21.5	7.1	Brandão, Reuber A., Natan M. Maciel, and Antonio Sebben. "A new species of Chaunus from central Brazil (Anura; Bufonidae)." Journal of Herpetology 41.2 (2007): 309-317.	n/a	n/a	No	Brandão, Reuber A., Natan M. Maciel, and Antonio Sebben. "A new species of Chaunus from central Brazil (Anura; Bufonidae)." Journal of Herpetology 41.2 (2007): 309-317.
Hyloidea	Bufonidae	Rhinella	Rhinella yanachaga	n/a	40.3	13.9	1.7	Lehr, Edgar, et al. "A new species of arboreal Rhinella (Anura: Bufonidae) from Yanachaga-Chemillén National Park in central Peru." Zootaxa 1662.1 (2007): 1-14.	n/a	n/a	No	Lehr, Edgar, et al. "A new species of arboreal Rhinella (Anura: Bufonidae) from Yanachaga-Chemillén National Park in central Peru." Zootaxa 1662.1 (2007): 1-14.
Hyloidea	Bufonidae	Sclerophrys	Sclerophrys asmarae	n/a	78.8	n/a	4	Tandy, M., et al. "A TETRAPLOID SPECIES OF BUFO (ANURA BUFONIDAE) FROM ETHIOPIA: PUBBLICAZIONI DEL CENTRO DI STUDIO PER LA FAUNISTICA ED ECOLOGIA TROPICALI DEL CNR: CCXXXVII." Monitore Zoologico Italiano. Supplemento 17.1 (1982): 1-79.	947.2	Tandy, M., et al. "A TETRAPLOID SPECIES OF BUFO (ANURA BUFONIDAE) FROM ETHIOPIA: PUBBLICAZIONI DEL CENTRO DI STUDIO PER LA FAUNISTICA ED ECOLOGIA TROPICALI DEL CNR: CCXXXVII." Monitore Zoologico Italiano. Supplemento 17.1 (1982): 1-79.	No	Tandy, M., et al. "A TETRAPLOID SPECIES OF BUFO (ANURA BUFONIDAE) FROM ETHIOPIA: PUBBLICAZIONI DEL CENTRO DI STUDIO PER LA FAUNISTICA ED ECOLOGIA TROPICALI DEL CNR: CCXXXVII." Monitore Zoologico Italiano. Supplemento 17.1 (1982): 1-79.
Hyloidea	Bufonidae	Sclerophrys	Sclerophrys channingi	n/a	109.3	43.2	4.8	Barej, Michael F., et al. "Dusted off—the African Amietophrynus superciliaris-species complex of giant toads." Zootaxa 2772.1 (2011): 1-32.	n/a	n/a	No	Barej, Michael F., et al. "Dusted off—the African Amietophrynus superciliaris-species complex of giant toads." Zootaxa 2772.1 (2011): 1-32.
Hyloidea	Bufonidae	Sclerophrys	Sclerophrys chevalieri	n/a	127	48.7	5.9	Barej, Michael F., et al. "Dusted off—the African Amietophrynus superciliaris-species complex of giant toads." Zootaxa 2772.1 (2011): 1-32.	n/a	n/a	No	Barej, Michael F., et al. "Dusted off—the African Amietophrynus superciliaris-species complex of giant toads." Zootaxa 2772.1 (2011): 1-32.
Hyloidea	Bufonidae	Sclerophrys	Sclerophrys kerinyagae	n/a	78.3	30.8	4.8	Keith, Ronalda. "A new species of Bufo from Africa, with comments on the toads of the Bufo regularis complex. American Museum novitates; no. 2345." (1968).	1000	Channing, A., and K. M. Howell. 2006. Amphibians of East Africa. Ithaca, NY: Cornell University Press.	No
Hyloidea	Bufonidae	Sclerophrys	Sclerophrys langanoensis	n/a	54.6	23.7	3	Largen, M. J., M. Tandy, and J. Tandy. "A NEW SPECIES OF TOAD FROM THE RIFT VALLEY OF ETHIOPIA, WITH OBSERVATIONS ON THE OTHER SPECIES OF BUFO (AMPHIBIA ANURA BUFONIDAE) RECORDED FROM THIS COUNTRY: PUBBLICAZIONI DEL CENTRO DI STUDIO PER LA FAUNISTICA ED ECOLOGIA TROPICALI DEL CNR: CXXXVII." Monitore Zoologico Italiano. Supplemento 10.1 (1978): 1-41.	1473	Largen, M. J., M. Tandy, and J. Tandy. "A NEW SPECIES OF TOAD FROM THE RIFT VALLEY OF ETHIOPIA, WITH OBSERVATIONS ON THE OTHER SPECIES OF BUFO (AMPHIBIA ANURA BUFONIDAE) RECORDED FROM THIS COUNTRY: PUBBLICAZIONI DEL CENTRO DI STUDIO PER LA FAUNISTICA ED ECOLOGIA TROPICALI DEL CNR: CXXXVII." Monitore Zoologico Italiano. Supplemento 10.1 (1978): 1-41.	No	Largen, M. J., M. Tandy, and J. Tandy. "A NEW SPECIES OF TOAD FROM THE RIFT VALLEY OF ETHIOPIA, WITH OBSERVATIONS ON THE OTHER SPECIES OF BUFO (AMPHIBIA ANURA BUFONIDAE) RECORDED FROM THIS COUNTRY: PUBBLICAZIONI DEL CENTRO DI STUDIO PER LA FAUNISTICA ED ECOLOGIA TROPICALI DEL CNR: CXXXVII." Monitore Zoologico Italiano. Supplemento 10.1 (1978): 1-41.
Hyloidea	Bufonidae	Sclerophrys	Sclerophrys reesi	n/a	56.6	24.6	4.3	Poynton, J. C. "A new Bufo and associated amphibia from southern Tanzania." Annals of the Natal Museum 23.1 (1977): 37-41.	n/a	n/a	No	Poynton, J. C. "A new Bufo and associated amphibia from southern Tanzania." Annals of the Natal Museum 23.1 (1977): 37-41.
Hyloidea	Bufonidae	Sclerophrys	Sclerophrys superciliaris	n/a	121	45.8	5.4	Barej, Michael F., et al. "Dusted off—the African Amietophrynus superciliaris-species complex of giant toads." Zootaxa 2772.1 (2011): 1-32.	n/a	n/a	No	Barej, Michael F., et al. "Dusted off—the African Amietophrynus superciliaris-species complex of giant toads." Zootaxa 2772.1 (2011): 1-32.
Hyloidea	Bufonidae	Sclerophrys	Sclerophrys xeros	n/a	61.3	n/a	3.7	Tandy, Mills, et al. A new species of Bufo (Anura: Bufonidae) from Africa's dry savannas. Texas Memorial Museum, The University of Texas at Austin, 1976.	880.4	Tandy, Mills, et al. A new species of Bufo (Anura: Bufonidae) from Africa's dry savannas. Texas Memorial Museum, The University of Texas at Austin, 1976.	n/a	n/a
Hyloidea	Bufonidae	Sigalegalephrynus	Sigalegalephrynus burnitelongensis	n/a	22.18	9.9	1.4	Sarker, Goutam C., et al. "New species, diversity, systematics, and conservation assessment of the Puppet Toads of Sumatra (Anura: Bufonidae: Sigalegalephrynus)." Zootaxa 4679.2 (2019): 365-391.	n/a	n/a	No	Sarker, Goutam C., et al. "New species, diversity, systematics, and conservation assessment of the Puppet Toads of Sumatra (Anura: Bufonidae: Sigalegalephrynus)." Zootaxa 4679.2 (2019): 365-391.
Hyloidea	Bufonidae	Sigalegalephrynus	Sigalegalephrynus gayoluesensis	n/a	26.49	11.83	1.5	Sarker, Goutam C., et al. "New species, diversity, systematics, and conservation assessment of the Puppet Toads of Sumatra (Anura: Bufonidae: Sigalegalephrynus)." Zootaxa 4679.2 (2019): 365-391.	4948.72	Sarker, Goutam C., et al. "New species, diversity, systematics, and conservation assessment of the Puppet Toads of Sumatra (Anura: Bufonidae: Sigalegalephrynus)." Zootaxa 4679.2 (2019): 365-391.	No
Hyloidea	Bufonidae	Sigalegalephrynus	Sigalegalephrynus harveyi	n/a	26.36	10.11	1.3	Sarker, Goutam C., et al. "New species, diversity, systematics, and conservation assessment of the Puppet Toads of Sumatra (Anura: Bufonidae: Sigalegalephrynus)." Zootaxa 4679.2 (2019): 365-391.	n/a	n/a	No
Hyloidea	Bufonidae	Sigalegalephrynus	Sigalegalephrynus mandailinguensis	n/a	38	17	2.1	Smart, U., G. C. Sarker, U. Arifin, M. B. Harvey, I. Sidik, A. Hamidy, N. Kurniawan, and E. N. Smith. 2017. A new genus and two new species of arboreal toads from the highlands of Sumatra with a phylogeny of Sundaland toad genera. Herpetologica 73: 63–75.	3400	Smart, U., G. C. Sarker, U. Arifin, M. B. Harvey, I. Sidik, A. Hamidy, N. Kurniawan, and E. N. Smith. 2017. A new genus and two new species of arboreal toads from the highlands of Sumatra with a phylogeny of Sundaland toad genera. Herpetologica 73: 63–75.	No	Smart, U., G. C. Sarker, U. Arifin, M. B. Harvey, I. Sidik, A. Hamidy, N. Kurniawan, and E. N. Smith. 2017. A new genus and two new species of arboreal toads from the highlands of Sumatra with a phylogeny of Sundaland toad genera. Herpetologica 73: 63–75.
Hyloidea	Bufonidae	Truebella	Truebella skoptes	n/a	25.5	8.32	Tympanum indistinct	Graybeal, A., and D. C. Cannatella. 1995. A new taxon of Bufonidae from Peru, with descriptions of two new species and a review of the phylogenetic status of supraspecific bufonid taxa. Herpetologica 51: 105–131.	Mute species	Graybeal, A., and D. C. Cannatella. 1995. A new taxon of Bufonidae from Peru, with descriptions of two new species and a review of the phylogenetic status of supraspecific bufonid taxa. Herpetologica 51: 105–131.	n/a	n/a
Hyloidea	Bufonidae	Truebella	Truebella tothastes	KU 196601	28.8	11.6	Tympanum indistinct	Graybeal, A., and D. C. Cannatella. 1995. A new taxon of Bufonidae from Peru, with descriptions of two new species and a review of the phylogenetic status of supraspecific bufonid taxa. Herpetologica 51: 105–131.	Mute species	Graybeal, A., and D. C. Cannatella. 1995. A new taxon of Bufonidae from Peru, with descriptions of two new species and a review of the phylogenetic status of supraspecific bufonid taxa. Herpetologica 51: 105–131.	n/a	n/a
Hyloidea	Bufonidae	Werneria	Werneria submontana	ZFMK 69699	35.4	17.2	Tympanum indistinct	Rödel, M.-O., A. Schmitz, O. S. G. Pauwels, and W. Böhme. 2004. Revision of the genus Werneria Poche, 1903, including the description of two new species from Cameroon and Gabon (Amphibia: Anura: Bufonidae). Zootaxa 720: 1–28.	n/a	n/a	No	Rödel, M.-O., A. Schmitz, O. S. G. Pauwels, and W. Böhme. 2004. Revision of the genus Werneria Poche, 1903, including the description of two new species from Cameroon and Gabon (Amphibia: Anura: Bufonidae). Zootaxa 720: 1–28.
Hyloidea	Calyptocephalellidae	Telmatobufo	Telmatobufo australis	IZUA 934-A	40	16	Tympanum indistinct	Formas, J. R. 1972. A second species of Chilean frog genus Telmatobufo (Anura: Leptodactylidae). Journal of Herpetology 6: 1–3.	n/a	n/a	No	Formas, J. R. 1972. A second species of Chilean frog genus Telmatobufo (Anura: Leptodactylidae). Journal of Herpetology 6: 1–3.
Hyloidea	Centrolenidae	Centrolene	Centrolene buckleyi	ZUEC-AMP 9352	28.92	15.92	0.51		2500	Bernal et al. 2004	n/a	n/a
Hyloidea	Centrolenidae	Chimerella	Chimerella corleone	n/a	19	9.9	0.5	Twomey, Evan, Jesse Delia, and Santiago Castroviejo-Fisher. "A review of northern Peruvian glassfrogs (Centrolenidae), with the description of four new remarkable species." Zootaxa3851.1 (2014): 1-87.	7629	Twomey, Evan, Jesse Delia, and Santiago Castroviejo-Fisher. "A review of northern Peruvian glassfrogs (Centrolenidae), with the description of four new remarkable species." Zootaxa3851.1 (2014): 1-87.	YES	Twomey, Evan, Jesse Delia, and Santiago Castroviejo-Fisher. "A review of northern Peruvian glassfrogs (Centrolenidae), with the description of four new remarkable species." Zootaxa3851.1 (2014): 1-87.
Hyloidea	Centrolenidae	Cochranella	Cochranella euknemos	n/a	24	n/a	2.9	Savage, J. M., and P. H. Starrett. 1967. A new fringe-limbed tree-frog (family Centrolenidae) from lower Central America. Copeia 1967: 604–609.	4200	Vargas-Salinas & Amézquita 2013	No	Savage, J. M., and P. H. Starrett. 1967. A new fringe-limbed tree-frog (family Centrolenidae) from lower Central America. Copeia 1967: 604–609.
Hyloidea	Centrolenidae	Espadarana	Espadarana andina	MCZ 72502	24.2	14	n/a	Rivero, J. A. 1968. Los centrolenidos de Venezuela (Amphibia, Salientia). Memoria. Sociedad de Ciencias Naturales La Salle. Caracas 28: 301–334.	5673.21	Señaris and Ayarzaguena 2005	No	Rivero, J. A. 1968. Los centrolenidos de Venezuela (Amphibia, Salientia). Memoria. Sociedad de Ciencias Naturales La Salle. Caracas 28: 301–334.
Hyloidea	Centrolenidae	Hyalinobatrachium	Hyalinobatrachium cappelei	n/a	22	n/a	0.6	Myers, Charles W., and Maureen A. Donnelly. "A tepui herpetofauna on a granitic mountain (Tamacuari) in the borderland between Venezuela and Brazil: report from the Phipps Tapirapecó Expedition. American Museum novitates; no. 3213." (1997).	4600	Myers, Charles W., and Maureen A. Donnelly. "A tepui herpetofauna on a granitic mountain (Tamacuari) in the borderland between Venezuela and Brazil: report from the Phipps Tapirapecó Expedition. American Museum novitates; no. 3213." (1997).	YES	Myers, Charles W., and Maureen A. Donnelly. "A tepui herpetofauna on a granitic mountain (Tamacuari) in the borderland between Venezuela and Brazil: report from the Phipps Tapirapecó Expedition. American Museum novitates; no. 3213." (1997).
Hyloidea	Centrolenidae	Hyalinobatrachium	Hyalinobatrachium carlesvilai	ZUEC-AMP 11366	18.87	11.7	0.4		4702.48	Castroviejo-Fisher et al. 2009	n/a	n/a
Hyloidea	Centrolenidae	Ikakogi	Ikakogi ispacue	n/a	n/a	n/a	Tympanum indistinct	Rada M, Dos Santos Dias PH, Pérez-Gonzalez JL, Anganoy-Criollo M, Rueda-Solano LA, et al. (2019) The poverty of adult morphology: Bioacoustics, genetics, and internal tadpole morphology reveal a new species of glassfrog (Anura: Centrolenidae: Ikakogi) from the Sierra Nevada de Santa Marta, Colombia. PLOS ONE 14(5): e0215349. https://doi.org/10.1371/journal.pone.0215349	3129	Rada M, Dos Santos Dias PH, Pérez-Gonzalez JL, Anganoy-Criollo M, Rueda-Solano LA, et al. (2019) The poverty of adult morphology: Bioacoustics, genetics, and internal tadpole morphology reveal a new species of glassfrog (Anura: Centrolenidae: Ikakogi) from the Sierra Nevada de Santa Marta, Colombia. PLOS ONE 14(5): e0215349. https://doi.org/10.1371/journal.pone.0215349	YES	Rada M, Dos Santos Dias PH, Pérez-Gonzalez JL, Anganoy-Criollo M, Rueda-Solano LA, et al. (2019) The poverty of adult morphology: Bioacoustics, genetics, and internal tadpole morphology reveal a new species of glassfrog (Anura: Centrolenidae: Ikakogi) from the Sierra Nevada de Santa Marta, Colombia. PLOS ONE 14(5): e0215349. https://doi.org/10.1371/journal.pone.0215349
Hyloidea	Centrolenidae	Ikakogi	Ikakogi tayrona	n/a	33.35	n/a	n/a		2710	Rada M, Dos Santos Dias PH, Pérez-Gonzalez JL, Anganoy-Criollo M, Rueda-Solano LA, et al. (2019) The poverty of adult morphology: Bioacoustics, genetics, and internal tadpole morphology reveal a new species of glassfrog (Anura: Centrolenidae: Ikakogi) from the Sierra Nevada de Santa Marta, Colombia. PLOS ONE 14(5): e0215349. https://doi.org/10.1371/journal.pone.0215349	YES	Rada M, Dos Santos Dias PH, Pérez-Gonzalez JL, Anganoy-Criollo M, Rueda-Solano LA, et al. (2019) The poverty of adult morphology: Bioacoustics, genetics, and internal tadpole morphology reveal a new species of glassfrog (Anura: Centrolenidae: Ikakogi) from the Sierra Nevada de Santa Marta, Colombia. PLOS ONE 14(5): e0215349. https://doi.org/10.1371/journal.pone.0215349
Hyloidea	Centrolenidae	Nymphargus	Nymphargus ignotus	n/a	20	13.5	0.6	Rada, Marco, Jhon Jairo Ospina-Sarria, and Juan M. Guayasamin. "A taxonomic review of tan-brown Glassfrogs (Anura: Centrolenidae), with the description of a new species from southwestern Colombia." South American Journal of Herpetology 12.2 (2017): 136-156.	n/a	n/a	YES	Rada, Marco, Jhon Jairo Ospina-Sarria, and Juan M. Guayasamin. "A taxonomic review of tan-brown Glassfrogs (Anura: Centrolenidae), with the description of a new species from southwestern Colombia." South American Journal of Herpetology 12.2 (2017): 136-156.
Hyloidea	Centrolenidae	Rulyrana	Rulyrana mcdiarmidi	n/a	26.15	16.6	0.9	Cisneros-Heredia, D. F., P. J. Venegas, M. Rada, and R. Schulte. 2008. A new species of glassfrog (Anura: Centrolenidae) from the foothill Andean forests of Ecuador and Peru. Herpetologica 64: 341–353.	n/a	n/a	YES	Cisneros-Heredia, D. F., P. J. Venegas, M. Rada, and R. Schulte. 2008. A new species of glassfrog (Anura: Centrolenidae) from the foothill Andean forests of Ecuador and Peru. Herpetologica 64: 341–353.
Hyloidea	Centrolenidae	Sachatamia	Sachatamia electrops	n/a	22.5	13.8	1.1	Rada, M., A. M. Jeckel, V. Z. Caorsi, L. S. Barrientos, M. Rivera-Correa, and T. Grant. 2017. A remarkable new white-eyed glassfrog species of Sachatamia from Colombia (Anura: Centrolenidae), with comments on the systematics of the genus. South American Journal of Herpetology 12: 157–173.	n/a	n/a	No	Rada, M., A. M. Jeckel, V. Z. Caorsi, L. S. Barrientos, M. Rivera-Correa, and T. Grant. 2017. A remarkable new white-eyed glassfrog species of Sachatamia from Colombia (Anura: Centrolenidae), with comments on the systematics of the genus. South American Journal of Herpetology 12: 157–173.
Hyloidea	Centrolenidae	Teratohyla	Teratohyla adenocheira	CBF 5535	22.4	12.4	1.1	Harvey, M. B., and B. P. Noonan. 2005. Bolivian glass frogs (Anura: Centrolenidae) with a descrition of a new species from Amazonia. Proceedings of the Biological Society of Washington 118: 428–441.	n/a	n/a	No	Harvey, M. B., and B. P. Noonan. 2005. Bolivian glass frogs (Anura: Centrolenidae) with a descrition of a new species from Amazonia. Proceedings of the Biological Society of Washington 118: 428–441.
Hyloidea	Centrolenidae	Vitreorana	Vitreorana eurygnatha	ZUEC-AMP 767	21.07	11.52	0.84		n/a	n/a	n/a	n/a
Hyloidea	Centrolenidae	Vitreorana	Vitreorana eurygnatha	ZUEC-AMP 4283	17.4	9.95	0.36		n/a	n/a	n/a	n/a
Hyloidea	Centrolenidae	Vitreorana	Vitreorana eurygnatha	ZUEC-AMP 4298	20.3	9.45	0.46		n/a	n/a	n/a	n/a
Hyloidea	Centrolenidae	Vitreorana	Vitreorana eurygnatha	ZUEC-AMP 4300	15.73	9.58	0.55		n/a	n/a	n/a	n/a
Hyloidea	Centrolenidae	Vitreorana	Vitreorana eurygnatha	ZUEC-AMP 8295	18.38	10.29	0.6		n/a	n/a	n/a	n/a
Hyloidea	Centrolenidae	Vitreorana	Vitreorana eurygnatha	ZUEC-AMP 8298	20.72	10.43	0.6		n/a	n/a	n/a	n/a
Hyloidea	Centrolenidae	Vitreorana	Vitreorana gorzulae	n/a	n/a	n/a	n/a		4250	Myers, Charles W., and Maureen A. Donnelly. "A tepui herpetofauna on a granitic mountain (Tamacuari) in the borderland between Venezuela and Brazil: report from the Phipps Tapirapecó Expedition. American Museum novitates; no. 3213." (1997).	YES	Myers, Charles W., and Maureen A. Donnelly. "A tepui herpetofauna on a granitic mountain (Tamacuari) in the borderland between Venezuela and Brazil: report from the Phipps Tapirapecó Expedition. American Museum novitates; no. 3213." (1997).
Hyloidea	Centrolenidae	Vitreorana	Vitreorana parvula	ZUEC-AMP 10497	19.54	11.62	0.71		n/a	n/a	n/a	n/a
Hyloidea	Centrolenidae	Vitreorana	Vitreorana parvula	ZUEC-AMP 10499	21.64	12.05	0.66		n/a	n/a	n/a	n/a
Hyloidea	Centrolenidae	Vitreorana	Vitreorana parvula	ZUEC-AMP 10500	21.72	11.71	0.73		n/a	n/a	n/a	n/a
Hyloidea	Centrolenidae	Vitreorana	Vitreorana parvula	ZUEC-AMP 10501	20.87	12.02	0.76		n/a	n/a	n/a	n/a
Hyloidea	Centrolenidae	Vitreorana	Vitreorana ritae	ZUEC-AMP 15379	16.16	10.31	0.67		n/a	n/a	n/a	n/a
Hyloidea	Centrolenidae	Vitreorana	Vitreorana uranoscopa	ZUEC-AMP 10495	19.25	11.74	0.69		4750	Heyer, W.R., Rand, A.S., Cruz, C.A.G., Peixoto, O.L. & Nelson, C.E. (1990) Frogs of Boracéia. Arquivos de Zoologia, 31(4), 231–410.	n/a	n/a
Hyloidea	Centrolenidae	Vitreorana	Vitreorana uranoscopa	ZUEC-AMP 6994	24.19	12.84	0.69		n/a	n/a	n/a	n/a
Hyloidea	Centrolenidae	Vitreorana	Vitreorana uranoscopa	ZUEC-AMP 10496	19.4	11.51	0.73		n/a	n/a	n/a	n/a
Hyloidea	Centrolenidae	Vitreorana	Vitreorana uranoscopa	ZUEC-AMP 10498	20.91	12.26	0.71		n/a	n/a	n/a	n/a
Hyloidea	Centrolenidae	Vitreorana	Vitreorana uranoscopa	ZUEC-AMP 18894	20.16	11.78	0.65		n/a	n/a	n/a	n/a
Hyloidea	Centrolenidae	Vitreorana	Vitreorana uranoscopa	ZUEC-AMP 19982	20.98	11.53	0.65		n/a	n/a	n/a	n/a
Hyloidea	Ceratobatrachidae	Cornufer	Cornufer adiastolus	n/a	41	22.5	3.9	Brown, R. M., S. J. Richards, J. Sukumaran, and J. Foufopoulos. 2006. A new morphologically cryptic species of forest frog (genus Platymantis) from New Britain Island, Bismarck Archipelago. Zootaxa 1334: 45–68.	4550	Brown, R. M., S. J. Richards, J. Sukumaran, and J. Foufopoulos. 2006. A new morphologically cryptic species of forest frog (genus Platymantis) from New Britain Island, Bismarck Archipelago. Zootaxa 1334: 45–68.	No	Brown, R. M., S. J. Richards, J. Sukumaran, and J. Foufopoulos. 2006. A new morphologically cryptic species of forest frog (genus Platymantis) from New Britain Island, Bismarck Archipelago. Zootaxa 1334: 45–68.
Hyloidea	Ceratobatrachidae	Cornufer	Cornufer admiraltiensis	SAMA R62799	36.7	21.4	3.6	Richards, S. J., A. L. Mack, and C. C. Austin. 2007. Two new species of Platymantis (Anura: Ceratobatrachidae) from the Admiralty Archipelago, Papua New Guinea. Zootaxa 1639: 41–55.	3999	Richards, S. J., A. L. Mack, and C. C. Austin. 2007. Two new species of Platymantis (Anura: Ceratobatrachidae) from the Admiralty Archipelago, Papua New Guinea. Zootaxa 1639: 41–55.	No	Richards, S. J., A. L. Mack, and C. C. Austin. 2007. Two new species of Platymantis (Anura: Ceratobatrachidae) from the Admiralty Archipelago, Papua New Guinea. Zootaxa 1639: 41–55.
Hyloidea	Ceratobatrachidae	Cornufer	Cornufer latro	SAMA R62819	38.3	18.2	3.4	Richards, S. J., A. L. Mack, and C. C. Austin. 2007. Two new species of Platymantis (Anura: Ceratobatrachidae) from the Admiralty Archipelago, Papua New Guinea. Zootaxa 1639: 41–55.	2607	Richards, S. J., A. L. Mack, and C. C. Austin. 2007. Two new species of Platymantis (Anura: Ceratobatrachidae) from the Admiralty Archipelago, Papua New Guinea. Zootaxa 1639: 41–55.	No	Richards, S. J., A. L. Mack, and C. C. Austin. 2007. Two new species of Platymantis (Anura: Ceratobatrachidae) from the Admiralty Archipelago, Papua New Guinea. Zootaxa 1639: 41–55.
Hyloidea	Ceratobatrachidae	Liurana	Liurana himalayana	V/A/NERC/ZSI/1438	20.1	10.71	1.08	Saikia, B., and B. Sinha. 2019. On the Liurana (Anura: Ceratobatrachidae) of India with the description of three new species from Tale Valley Wildlife Sanctuary in Arunachal Pradesh, eastern Himalayas. Records of the Zoological Survey of India 119: 303–315 (DOI:10.26515/rzsi/v119/i4/2019/141629).	n/a	n/a	No	Saikia, B., and B. Sinha. 2019. On the Liurana (Anura: Ceratobatrachidae) of India with the description of three new species from Tale Valley Wildlife Sanctuary in Arunachal Pradesh, eastern Himalayas. Records of the Zoological Survey of India 119: 303–315 (DOI:10.26515/rzsi/v119/i4/2019/141629).
Hyloidea	Ceratobatrachidae	Liurana	Liurana minuta	V/A/NERC/1441	14.26	8.44	1.37	Saikia, B., and B. Sinha. 2019. On the Liurana (Anura: Ceratobatrachidae) of India with the description of three new species from Tale Valley Wildlife Sanctuary in Arunachal Pradesh, eastern Himalayas. Records of the Zoological Survey of India 119: 303–315 (DOI:10.26515/rzsi/v119/i4/2019/141629).	n/a	n/a	YES	Saikia, B., and B. Sinha. 2019. On the Liurana (Anura: Ceratobatrachidae) of India with the description of three new species from Tale Valley Wildlife Sanctuary in Arunachal Pradesh, eastern Himalayas. Records of the Zoological Survey of India 119: 303–315 (DOI:10.26515/rzsi/v119/i4/2019/141629).
Hyloidea	Ceratobatrachidae	Platymantis	Platymantis biak	PNM 9679	39.9	21.7	2.9	Siler, C. D., A. C. Diesmos, C. W. Linkem, M. L. Diesmos, and R. M. Brown. 2010. A new species of limestone-forest frog, genus Platymantis (Amphibia: Anura: Ceratobatrachidae) from central Luzon Island, Philippines. Zootaxa 2482: 49–63.	n/a	n/a	No	Siler, C. D., A. C. Diesmos, C. W. Linkem, M. L. Diesmos, and R. M. Brown. 2010. A new species of limestone-forest frog, genus Platymantis (Amphibia: Anura: Ceratobatrachidae) from central Luzon Island, Philippines. Zootaxa 2482: 49–63.
Hyloidea	Ceratobatrachidae	Platymantis	Platymantis pseudodorsalis	NMPH 6689	30.7	18	3	Brown, W. C., A. C. Alcala, and A. C. Diesmos. 1999. Four new species of the genus Platymantis (Amphibia: Ranidae) from Luzon Island, Philippines. Proceedings of the California Academy of Sciences, 4th Series 51: 449–460.	1750	Brown, W. C., A. C. Alcala, and A. C. Diesmos. 1999. Four new species of the genus Platymantis (Amphibia: Ranidae) from Luzon Island, Philippines. Proceedings of the California Academy of Sciences, 4th Series 51: 449–460.	No	Brown, W. C., A. C. Alcala, and A. C. Diesmos. 1999. Four new species of the genus Platymantis (Amphibia: Ranidae) from Luzon Island, Philippines. Proceedings of the California Academy of Sciences, 4th Series 51: 449–460.
Hyloidea	Ceratophryidae	Ceratophrys	Ceratophrys joazeirensis	NHMW 4582	68.9	31.5	Tympanum indistinct	Mercadal de Barrio, I. T. 1986. Ceratophrys joazeirensis sp. n. (Ceratophryidae, Anura) del noreste de Brasil. Amphibia-Reptilia 7: 313–334.	n/a	n/a	No	Mercadal de Barrio, I. T. 1986. Ceratophrys joazeirensis sp. n. (Ceratophryidae, Anura) del noreste de Brasil. Amphibia-Reptilia 7: 313–334.
Hyloidea	Ceratophryidae	Lepidobatrachus	Lepidobatrachus llanensis	n/a	67	23	Tympanum indistinct	Reig, Osvaldo A., and José Miguel Alfredo María Cei. "Elucidación morfológico-estadística de las entidades del género Lepidobatrachus Budgett (Anura, Ceratophrynidae), con consideraciones sobre la extensión del distrito chaqueño del dominio zoogeográfico subtropical." Physis 24 (1963).	n/a	n/a	No	Reig, Osvaldo A., and José Miguel Alfredo María Cei. "Elucidación morfológico-estadística de las entidades del género Lepidobatrachus Budgett (Anura, Ceratophrynidae), con consideraciones sobre la extensión del distrito chaqueño del dominio zoogeográfico subtropical." Physis 24 (1963).
Hyloidea	Cycloramphidae	Cycloramphus	Cycloramphus acangatan	n/a	37.5	12.1	Tympanum indistinct	Verdade, V. K., and M. T. Rodrigues. 2003. A new species of Cycloramphus (Anura, Leptodactylidae) from the Atlantic Forest, Brazil. Herpetologica 59: 513–518.	n/a	n/a	No	Verdade, V. K., and M. T. Rodrigues. 2003. A new species of Cycloramphus (Anura, Leptodactylidae) from the Atlantic Forest, Brazil. Herpetologica 59: 513–518.
Hyloidea	Cycloramphidae	Thoropa	Thoropa megatympanum	ZUEC-AMP 3957	47.28	23	5		2411	Nunes-de-Almeida, C. H. L., Assis, C. L., Feio, R. N. & Toledo, L. F. 2016. Redescription of the advertisement call of five species of Thoropa (Anura, Cycloramphidae), including recordings of rare and endangered species. Plos One, 11(9): e0162617	n/a	n/a
Hyloidea	Cycloramphidae	Thoropa	Thoropa megatympanum	ZUEC-AMP 2096	29.29	16.48	2.6		n/a	n/a	n/a	n/a
Hyloidea	Cycloramphidae	Thoropa	Thoropa megatympanum	ZUEC-AMP 2098	31.72	18.14	3.12		n/a	n/a	n/a	n/a
Hyloidea	Cycloramphidae	Thoropa	Thoropa megatympanum	ZUEC-AMP 2104	32.04	17.43	3.45		n/a	n/a	n/a	n/a
Hyloidea	Cycloramphidae	Thoropa	Thoropa megatympanum	ZUEC-AMP 2842	41.96	23.18	4.46		n/a	n/a	n/a	n/a
Hyloidea	Cycloramphidae	Thoropa	Thoropa megatympanum	ZUEC-AMP 15938	33.99	18.4	3		n/a	n/a	n/a	n/a
Hyloidea	Cycloramphidae	Thoropa	Thoropa miliaris	ZUEC-AMP 23634	34.82	21.26	2.43		2137	Nunes-de-Almeida, C. H. L., Assis, C. L., Feio, R. N. & Toledo, L. F. 2016. Redescription of the advertisement call of five species of Thoropa (Anura, Cycloramphidae), including recordings of rare and endangered species. Plos One, 11(9): e0162617	n/a	n/a
Hyloidea	Cycloramphidae	Thoropa	Thoropa miliaris	ZUEC-AMP 23588	44.23	26.64	3.35		n/a	n/a	n/a	n/a
Hyloidea	Cycloramphidae	Thoropa	Thoropa miliaris	ZUEC-AMP 23623	41.22	25.68	3.32		n/a	n/a	n/a	n/a
Hyloidea	Cycloramphidae	Thoropa	Thoropa miliaris	ZUEC-AMP 23633	51	28.38	3.49		n/a	n/a	n/a	n/a
Hyloidea	Cycloramphidae	Thoropa	Thoropa saxatilis	n/a	57.5	33.9	6.5	Cocroft, Reginald B., and W. Ronald Heyer. "Notes on the frog genus Thoropa (Amphibia: Leptodactylidae) with a description of a new species (Thoropa saxatilis)." Proceedings of the Biological Society of Washington 101.1 (1988): 209-220.	n/a	n/a	n/a	n/a
Hyloidea	Cycloramphidae	Thoropa	Thoropa taophora	ZUEC-AMP 1472	46.64	27.3	3.06		750	Nunes-de-Almeida, C. H. L., Assis, C. L., Feio, R. N. & Toledo, L. F. 2016. Redescription of the advertisement call of five species of Thoropa (Anura, Cycloramphidae), including recordings of rare and endangered species. Plos One, 11(9): e0162617	n/a	n/a
Hyloidea	Cycloramphidae	Thoropa	Thoropa taophora	ZUEC-AMP 1277	45.18	26.44	3.18		n/a	n/a	n/a	n/a
Hyloidea	Cycloramphidae	Thoropa	Thoropa taophora	ZUEC-AMP 1348	46.46	25.91	2.9		n/a	n/a	n/a	n/a
Hyloidea	Cycloramphidae	Thoropa	Thoropa taophora	ZUEC-AMP 23217	52.96	30.39	3.37		n/a	n/a	n/a	n/a
Hyloidea	Dendrobatidae	Adelphobates	Adelphobates castaneoticus	ZUEC-AMP 13523	23.01	9.2	1.67		4198.7	Santos et al. 2014	n/a	n/a
Hyloidea	Dendrobatidae	Adelphobates	Adelphobates castaneoticus	ZUEC-AMP 13521	21.92	9.22	1.47		n/a	n/a	n/a	n/a
Hyloidea	Dendrobatidae	Adelphobates	Adelphobates galactonotus	ZUEC-AMP 9036	35.25	14.92	1.86		2998.1	Santos et al. 2014	No	Hoogmoed, Marinus S., and Teresa CS Avila-Pires CS Avila. "Inventory of color polymorphism in populations of Dendrobates galactonotus (Anura: Dendrobatidae), a poison frog endemic to Brazil." Phyllomedusa: Journal of Herpetology11.2 (2012): 95-115.
Hyloidea	Dendrobatidae	Adelphobates	Adelphobates quinquevittatus	ZUEC-AMP 7815	17.79	7.49	1.32		n/a	n/a	n/a	n/a
Hyloidea	Dendrobatidae	Adelphobates	Adelphobates quinquevittatus	ZUEC-AMP 13542	20.66	8.45	1.32		n/a	n/a	n/a	n/a
Hyloidea	Dendrobatidae	Adelphobates	Adelphobates quinquevittatus	ZUEC-AMP 13544	18.01	8.06	1.24		n/a	n/a	n/a	n/a
Hyloidea	Dendrobatidae	Ameerega	Ameerega altamazonica	n/a	21.4	n/a	1.4	Twomey, Evan, and Jason L. Brown. "A partial revision of the Ameerega hahneli complex (Anura: Dendrobatidae) and a new cryptic species from the East-Andean versant of Central Peru." Zootaxa 1757.1 (2008): 49-65.	4600	Tonini, João Filipe Riva, et al. "Allometric escape from acoustic constraints is rare for frog calls." Ecology and Evolution 10.8 (2020): 3686-3695.	No	Twomey, Evan, and Jason L. Brown. "A partial revision of the Ameerega hahneli complex (Anura: Dendrobatidae) and a new cryptic species from the East-Andean versant of Central Peru." Zootaxa 1757.1 (2008): 49-65.
Hyloidea	Dendrobatidae	Ameerega	Ameerega berohoka	ZUEC-AMP 9014	18.7	9.62	1.35		4200	Tonini, João Filipe Riva, et al. "Allometric escape from acoustic constraints is rare for frog calls." Ecology and Evolution 10.8 (2020): 3686-3695.	No	Vaz-Silva, Wilian, and Natan Medeiros Maciel. "A new cryptic species of Ameerega (Anura: Dendrobatidae) from Brazilian Cerrado." Zootaxa 2826.1 (2011): 57-68.
Hyloidea	Dendrobatidae	Ameerega	Ameerega berohoka	n/a	19.7	9.3	1.5	Vaz-Silva, Wilian, and Natan Medeiros Maciel. "A new cryptic species of Ameerega (Anura: Dendrobatidae) from Brazilian Cerrado." Zootaxa 2826.1 (2011): 57-68.	n/a	n/a	n/a	n/a
Hyloidea	Dendrobatidae	Ameerega	Ameerega boehmei	n/a	25.5	12.5	1.5	QUENNET, VERENA. "Another case of cryptic diversity in poison frogs (Dendrobatidae: Ameerega)—description of a new species from Bolivia." Zootaxa 2028 (2009): 20-30.	2995	QUENNET, VERENA. "Another case of cryptic diversity in poison frogs (Dendrobatidae: Ameerega)—description of a new species from Bolivia." Zootaxa 2028 (2009): 20-30.	YES	QUENNET, VERENA. "Another case of cryptic diversity in poison frogs (Dendrobatidae: Ameerega)—description of a new species from Bolivia." Zootaxa 2028 (2009): 20-30.
Hyloidea	Dendrobatidae	Ameerega	Ameerega braccata	ZUEC-AMP 9145	21.39	11.2	1.51		3986.4	Tonini, João Filipe Riva, et al. "Allometric escape from acoustic constraints is rare for frog calls." Ecology and Evolution 10.8 (2020): 3686-3695.	No	Forti, Lucas Rodriguez, Tami Mott, and Christine Strüssmann. "Breeding biology of Ameerega braccata (Steindachner, 1864)(Anura: Dendrobatidae) in the Cerrado of Brazil." Journal of Natural history 47.35-36 (2013): 2363-2371.
Hyloidea	Dendrobatidae	Ameerega	Ameerega braccata	ZUEC-AMP 9015	20.98	10.97	1.72		n/a	n/a	n/a	n/a
Hyloidea	Dendrobatidae	Ameerega	Ameerega braccata	ZUEC-AMP 9143	17.83	9.43	1.3		n/a	n/a	n/a	n/a
Hyloidea	Dendrobatidae	Ameerega	Ameerega flavopicta	ZUEC-AMP 3015	27.29	12.85	1.63		3288.1	Tonini, João Filipe Riva, et al. "Allometric escape from acoustic constraints is rare for frog calls." Ecology and Evolution 10.8 (2020): 3686-3695.	No	Lima, N. G., & Eterovick, P. C. (2013). Natural history of Ameerega flavopicta (Dendrobatidae) on an Island formed by Três Marias hydroelectric reservoir in southeastern Brazil. Journal of Herpetology, 47(3), 480-488.
Hyloidea	Dendrobatidae	Ameerega	Ameerega flavopicta	ZUEC-AMP 2195	29.07	14.44	1.7		n/a	n/a	n/a	n/a
Hyloidea	Dendrobatidae	Ameerega	Ameerega flavopicta	ZUEC-AMP 3641	28.13	13.95	1.54		n/a	n/a	n/a	n/a
Hyloidea	Dendrobatidae	Ameerega	Ameerega hahneli	ZUEC-AMP 9040	20.5	9.44	1.47		4773	Tonini, João Filipe Riva, et al. "Allometric escape from acoustic constraints is rare for frog calls." Ecology and Evolution 10.8 (2020): 3686-3695.	No	Acioli, Ellen Cristina Serrão, and Selvino Neckel-Oliveira. "Reproductive biology of Ameerega trivittata (Anura: Dendrobatidae) in an area of terra firme forest in eastern Amazonia." Acta amazonica 44.4 (2014): 473-480.
Hyloidea	Dendrobatidae	Ameerega	Ameerega hahneli	ZUEC-AMP 8505	18.16	9.16	1.51		n/a	n/a	n/a	n/a
Hyloidea	Dendrobatidae	Ameerega	Ameerega hahneli	ZUEC-AMP 11754	18.63	9.25	1.41		n/a	n/a	n/a	n/a
Hyloidea	Dendrobatidae	Ameerega	Ameerega ignipedis	n/a	22.4	10.6	2	Brown, Jason L., and Evan Twomey. "Complicated histories: three new species of poison frogs of the genus Ameerega (Anura: Dendrobatidae) from north-central Peru." Zootaxa2049 (2009): 1-38.	4583	Tonini, João Filipe Riva, et al. "Allometric escape from acoustic constraints is rare for frog calls." Ecology and Evolution 10.8 (2020): 3686-3695.	YES	Brown, Jason L., and Evan Twomey. "Complicated histories: three new species of poison frogs of the genus Ameerega (Anura: Dendrobatidae) from north-central Peru." Zootaxa2049 (2009): 1-38.
Hyloidea	Dendrobatidae	Ameerega	Ameerega munduruku	ZUEC-AMP 17135	28.64	13.5	1.79		3591.5	Neves, Matheus Oliveira, et al. "A new species of poison frog, genus Ameerega (Anura: Dendrobatidae), from the southern Amazonian rain forest." Salamandra 53 (2017): 485-493.	No	Neves, Matheus Oliveira, et al. "A new species of poison frog, genus Ameerega (Anura: Dendrobatidae), from the southern Amazonian rain forest." Salamandra 53 (2017): 485-493.
Hyloidea	Dendrobatidae	Ameerega	Ameerega munduruku	ZUEC-AMP 16091	21.19	11.01	1.31		n/a	n/a	n/a	n/a
Hyloidea	Dendrobatidae	Ameerega	Ameerega munduruku	n/a	26.03	1.67	1.28		n/a	n/a	n/a	n/a
Hyloidea	Dendrobatidae	Ameerega	Ameerega pepperi	n/a	31.7	16.2	2.2	Brown, Jason L., and Evan Twomey. "Complicated histories: three new species of poison frogs of the genus Ameerega (Anura: Dendrobatidae) from north-central Peru." Zootaxa2049 (2009): 1-38.	2970	Tonini, João Filipe Riva, et al. "Allometric escape from acoustic constraints is rare for frog calls." Ecology and Evolution 10.8 (2020): 3686-3695.	YES	Brown, Jason L., and Evan Twomey. "Complicated histories: three new species of poison frogs of the genus Ameerega (Anura: Dendrobatidae) from north-central Peru." Zootaxa2049 (2009): 1-38.
Hyloidea	Dendrobatidae	Ameerega	Ameerega picta	ZUEC-AMP 9019	21.25	10.09	1.98		3843.2	Tonini, João Filipe Riva, et al. "Allometric escape from acoustic constraints is rare for frog calls." Ecology and Evolution 10.8 (2020): 3686-3695.	n/a	n/a
Hyloidea	Dendrobatidae	Ameerega	Ameerega picta	ZUEC-AMP 3498	23.93	11.68	1.75		n/a	n/a	n/a	n/a
Hyloidea	Dendrobatidae	Ameerega	Ameerega planipaleae	n/a	26.5	12.1	2.3	Morales, Víctor R., and Paul M. Velazco. "Una especie nueva de Epipedobates (Amphibia, Anura, Dendrobatidae) de Peru." Amphibia-Reptilia 19.4 (1998): 369-376.	n/a	n/a	No	Morales, Víctor R., and Paul M. Velazco. "Una especie nueva de Epipedobates (Amphibia, Anura, Dendrobatidae) de Peru." Amphibia-Reptilia 19.4 (1998): 369-376.
Hyloidea	Dendrobatidae	Ameerega	Ameerega trivittata	ZUEC-AMP 15984	38.71	19.7	2.3		2580	Tonini, João Filipe Riva, et al. "Allometric escape from acoustic constraints is rare for frog calls." Ecology and Evolution 10.8 (2020): 3686-3695.	No	Nothacker, J. A., Neu, C. P., Mayer, M., Wagner, N., & Loetters, S. (2018). Homing behavior in the Neotropical poison frog Ameerega trivittata. SALAMANDRA, 54(1), 30-36.
Hyloidea	Dendrobatidae	Ameerega	Ameerega trivittata	ZUEC-AMP 15985	37.39	18.65	2.63		n/a	n/a	n/a	n/a
Hyloidea	Dendrobatidae	Ameerega	Ameerega trivittata	ZUEC-AMP 15988	39.76	20.86	2.49		n/a	n/a	n/a	n/a
Hyloidea	Dendrobatidae	Ameerega	Ameerega yoshina	n/a	31.4	17.1	2.2	Brown, Jason L., and Evan Twomey. "Complicated histories: three new species of poison frogs of the genus Ameerega (Anura: Dendrobatidae) from north-central Peru." Zootaxa2049 (2009): 1-38.	3140	Tonini, João Filipe Riva, et al. "Allometric escape from acoustic constraints is rare for frog calls." Ecology and Evolution 10.8 (2020): 3686-3695.	YES	Brown, Jason L., and Evan Twomey. "Complicated histories: three new species of poison frogs of the genus Ameerega (Anura: Dendrobatidae) from north-central Peru." Zootaxa2049 (2009): 1-38.
Hyloidea	Dendrobatidae	Andinobates	Andinobates abditus	n/a	17.3	7.3	1	Myers, Charles W., and John W. Daly. "A new species of poison frog (Dendrobates) from Andean Ecuador, including an analysis of its skin."	n/a	n/a	No	Myers, Charles W., and John W. Daly. "A new species of poison frog (Dendrobates) from Andean Ecuador, including an analysis of its skin."
Hyloidea	Dendrobatidae	Andinobates	Andinobates cassidyhornae	n/a	18.99	8.51	1.05	Amezquita, Adolfo, et al. "A new species of Andean poison frog, Andinobates (Anura: Dendrobatidae), from the northwestern Andes of Colombia." Zootaxa 3620.1 (2013): 163-178.	4320	Amezquita, Adolfo, et al. "A new species of Andean poison frog, Andinobates (Anura: Dendrobatidae), from the northwestern Andes of Colombia." Zootaxa 3620.1 (2013): 163-178.	No	Amezquita, Adolfo, et al. "A new species of Andean poison frog, Andinobates (Anura: Dendrobatidae), from the northwestern Andes of Colombia." Zootaxa 3620.1 (2013): 163-178.
Hyloidea	Dendrobatidae	Andinobates	Andinobates daleswansoni	n/a	18.46	8.11	0.55	PACHECO, ÁLVARO ANDRÉS VELÁSQUEZ-ÁLVAREZ, and ALONSO QUEVEDO. "Two new and exceptional poison dart frogs of the genus Dendrobates (Anura: Dendrobatidae) from the Northeastern Flank of the cordillera Central of Colombia." Zootaxa 1259 (2006): 39-54.	n/a	n/a	No	PACHECO, ÁLVARO ANDRÉS VELÁSQUEZ-ÁLVAREZ, and ALONSO QUEVEDO. "Two new and exceptional poison dart frogs of the genus Dendrobates (Anura: Dendrobatidae) from the Northeastern Flank of the cordillera Central of Colombia." Zootaxa 1259 (2006): 39-54.
Hyloidea	Dendrobatidae	Andinobates	Andinobates daleswansoni	n/a	18.08	7.9	0.72	PACHECO, ÁLVARO ANDRÉS VELÁSQUEZ-ÁLVAREZ, and ALONSO QUEVEDO. "Two new and exceptional poison dart frogs of the genus Dendrobates (Anura: Dendrobatidae) from the Northeastern Flank of the cordillera Central of Colombia." Zootaxa 1259 (2006): 39-54.	n/a	n/a	n/a	n/a
Hyloidea	Dendrobatidae	Andinobates	Andinobates daleswansoni	n/a	17.83	8.27	0.69	PACHECO, ÁLVARO ANDRÉS VELÁSQUEZ-ÁLVAREZ, and ALONSO QUEVEDO. "Two new and exceptional poison dart frogs of the genus Dendrobates (Anura: Dendrobatidae) from the Northeastern Flank of the cordillera Central of Colombia." Zootaxa 1259 (2006): 39-54.	n/a	n/a	n/a	n/a
Hyloidea	Dendrobatidae	Andinobates	Andinobates dorisswansonae	n/a	16.28	8.08	1.09	PACHECO, ÁLVARO ANDRÉS VELÁSQUEZ-ÁLVAREZ, and ALONSO QUEVEDO. "Two new and exceptional poison dart frogs of the genus Dendrobates (Anura: Dendrobatidae) from the Northeastern Flank of the cordillera Central of Colombia." Zootaxa 1259 (2006): 39-54.	n/a	n/a	No	PACHECO, ÁLVARO ANDRÉS VELÁSQUEZ-ÁLVAREZ, and ALONSO QUEVEDO. "Two new and exceptional poison dart frogs of the genus Dendrobates (Anura: Dendrobatidae) from the Northeastern Flank of the cordillera Central of Colombia." Zootaxa 1259 (2006): 39-54.
Hyloidea	Dendrobatidae	Andinobates	Andinobates dorisswansonae	n/a	16.9	7.99	1.03	PACHECO, ÁLVARO ANDRÉS VELÁSQUEZ-ÁLVAREZ, and ALONSO QUEVEDO. "Two new and exceptional poison dart frogs of the genus Dendrobates (Anura: Dendrobatidae) from the Northeastern Flank of the cordillera Central of Colombia." Zootaxa 1259 (2006): 39-54.	n/a	n/a	n/a	n/a
Hyloidea	Dendrobatidae	Andinobates	Andinobates dorisswansonae	n/a	17.1	8.47	0.89	PACHECO, ÁLVARO ANDRÉS VELÁSQUEZ-ÁLVAREZ, and ALONSO QUEVEDO. "Two new and exceptional poison dart frogs of the genus Dendrobates (Anura: Dendrobatidae) from the Northeastern Flank of the cordillera Central of Colombia." Zootaxa 1259 (2006): 39-54.	n/a	n/a	n/a	n/a
Hyloidea	Dendrobatidae	Andinobates	Andinobates geminisae	n/a	12.68	5.73	0.68	Batista, Abel, et al. "A new species of Andinobates (Amphibia: Anura: Dendrobatidae) from west central Panama." Zootaxa3866.3 (2014): 333-352.	4520	Batista, Abel, et al. "A new species of Andinobates (Amphibia: Anura: Dendrobatidae) from west central Panama." Zootaxa3866.3 (2014): 333-352.	No	Batista, Abel, et al. "A new species of Andinobates (Amphibia: Anura: Dendrobatidae) from west central Panama." Zootaxa3866.3 (2014): 333-352.
Hyloidea	Dendrobatidae	Andinobates	Andinobates minutus	ZUEC-AMP 11073	19.58	10.56	1.57		6001.7	Santos et al. 2014	No	Agudelo-Cantero, Gustavo A., et al. "Diet of the blue-bellied poison frog Andinobates minutus (Anura: Dendrobatidae) in two populations from the Colombian Pacific." Journal of Herpetology 49.3 (2015): 452-461.
Hyloidea	Dendrobatidae	Andinobates	Andinobates tolimensis	n/a	17.66	7.98	1.18	QUEVEDO, ALONSO. "A new species of poison frog (Amphibia: Dendrobatidae) from the Andean mountains of Tolima, Colombia." Zootaxa 1638 (2007): 59-68.	4975	QUEVEDO, ALONSO. "A new species of poison frog (Amphibia: Dendrobatidae) from the Andean mountains of Tolima, Colombia." Zootaxa 1638 (2007): 59-68.	No	QUEVEDO, ALONSO. "A new species of poison frog (Amphibia: Dendrobatidae) from the Andean mountains of Tolima, Colombia." Zootaxa 1638 (2007): 59-68.
Hyloidea	Dendrobatidae	Andinobates	Andinobates victimatus	n/a	14.42	6.17	0.69	Marquez, Roberto, et al. "A new species of Andinobates (Anura: Dendrobatidae) from the Urabá region of Colombia." Zootaxa 4290.3 (2017): 531-546.	5750	Marquez, Roberto, et al. "A new species of Andinobates (Anura: Dendrobatidae) from the Urabá region of Colombia." Zootaxa 4290.3 (2017): 531-546.	No	Marquez, Roberto, et al. "A new species of Andinobates (Anura: Dendrobatidae) from the Urabá region of Colombia." Zootaxa 4290.3 (2017): 531-546.
Hyloidea	Dendrobatidae	Andinobates	Andinobates victimatus	n/a	13.62	6.57	0.64	Marquez, Roberto, et al. "A new species of Andinobates (Anura: Dendrobatidae) from the Urabá region of Colombia." Zootaxa 4290.3 (2017): 531-546.	n/a	n/a	n/a	n/a
Hyloidea	Dendrobatidae	Andinobates	Andinobates victimatus	n/a	14.67	6.35	0.64	Marquez, Roberto, et al. "A new species of Andinobates (Anura: Dendrobatidae) from the Urabá region of Colombia." Zootaxa 4290.3 (2017): 531-546.	n/a	n/a	n/a	n/a
Hyloidea	Dendrobatidae	Colostethus	Colostethus dysprosium	n/a	23.2	11.2	1.7	Rivero, Juan A., and Marco A. Serna. "Nuevos Colostethus (Amphibia, Dendrobatidae) del Departamento de Antioquia, Colombia, con la descripción del renacuajo de Colostethus fraterdanieli." Revista de Ecología Latinoamericana 2.1-3 (1995): 45-58.	n/a	n/a	No	Rivero, Juan A., and Marco A. Serna. "Nuevos Colostethus (Amphibia, Dendrobatidae) del Departamento de Antioquia, Colombia, con la descripción del renacuajo de Colostethus fraterdanieli." Revista de Ecología Latinoamericana 2.1-3 (1995): 45-58.
Hyloidea	Dendrobatidae	Colostethus	Colostethus inguinalis	n/a	25	n/a	1.65	James, Taylor, Hunter, Ryan. 2021. Evolutionary and allometric insights into anuran auditory sensitivity and morphology. Brain, Behavior and Evolution.	3873	James, Taylor, Hunter, Ryan. 2021. Evolutionary and allometric insights into anuran auditory sensitivity and morphology. Brain, Behavior and Evolution.	n/a	n/a
Hyloidea	Dendrobatidae	Colostethus	Colostethus latinasus	ZUEC-AMP 18785	17	7.8	1		2658	Ibanez, Roberto D., et al. "Altitudinal distribution and advertisement call of Colostethus latinasus (Amphibia: Dendrobatidae), endemic species from eastern Panama and type species of Colostethus, with a molecular assessment of similar sympatric species." Zootaxa 4254.1 (2017): 91-101.	No	Ibanez, Roberto D., et al. "Altitudinal distribution and advertisement call of Colostethus latinasus (Amphibia: Dendrobatidae), endemic species from eastern Panama and type species of Colostethus, with a molecular assessment of similar sympatric species." Zootaxa 4254.1 (2017): 91-101.
Hyloidea	Dendrobatidae	Colostethus	Colostethus lynchi	n/a	27.9	7	1.9	Grant, Taran. "Una nueva especie de Colostethus del grupo edwardsi de Colombia." Revista de la Academia Colombiana de Ciencias Exactas, Fisicas y Naturales 22 (1998): 423-428.	n/a	n/a	n/a	n/a
Hyloidea	Dendrobatidae	Colostethus	Colostethus ucumari	n/a	22.1	10	1.2	Grant, Taran. "A new, toxic species of Colostethus (Anura: Dendrobatidae: Colostethinae) from the Cordillera Central of Colombia." Zootaxa 1555.1 (2007): 39-51.	n/a	n/a	No	Grant, Taran. "A new, toxic species of Colostethus (Anura: Dendrobatidae: Colostethinae) from the Cordillera Central of Colombia." Zootaxa 1555.1 (2007): 39-51.
Hyloidea	Dendrobatidae	Dendrobates	Dendrobates auratus	n/a	29	n/a	1.43	James, Taylor, Hunter, Ryan. 2021. Evolutionary and allometric insights into anuran auditory sensitivity and morphology. Brain, Behavior and Evolution.	3016.3	James, Taylor, Hunter, Ryan. 2021. Evolutionary and allometric insights into anuran auditory sensitivity and morphology. Brain, Behavior and Evolution.	n/a	n/a
Hyloidea	Dendrobatidae	Dendrobates	Dendrobates leucomelas	ZUEC-AMP 3456	22.45	9.75	1.22		2845.1	Tonini, João Filipe Riva, et al. "Allometric escape from acoustic constraints is rare for frog calls." Ecology and Evolution 10.8 (2020): 3686-3695.	No	Doan, Tiffany M., Anthony M. Nowacki, and Perry A. Roberts. "Dendrobates leucomelas." Catalogue of American Amphibians and Reptiles (CAAR) (2012).
Hyloidea	Dendrobatidae	Dendrobates	Dendrobates nubeculosus	n/a	24.5	10.3	1.6	Jungfer, KARL-HEINZ, and W. O. L. F. G. A. N. G. Böhme. "A new poison-dart frog (Dendrobates) from northern central Guyana (Amphibia: Anura: Dendrobatidae)." Salamandra 40.2 (2004): 99-104.	n/a	n/a	No	Jungfer, KARL-HEINZ, and W. O. L. F. G. A. N. G. Böhme. "A new poison-dart frog (Dendrobates) from northern central Guyana (Amphibia: Anura: Dendrobatidae)." Salamandra 40.2 (2004): 99-104.
Hyloidea	Dendrobatidae	Dendrobates	Dendrobates tinctorius	ZUEC-AMP 17632	34.94	14.98	1.78		2948.6	Tonini, João Filipe Riva, et al. "Allometric escape from acoustic constraints is rare for frog calls." Ecology and Evolution 10.8 (2020): 3686-3695.	No	ROJAS, Bibiana; PAŠUKONIS, Andrius. From habitat use to social behavior: natural history of a voiceless poison frog, Dendrobates tinctorius. PeerJ, v. 7, p. e7648, 2019.
Hyloidea	Dendrobatidae	Dendrobates	Dendrobates tinctorius	ZUEC-AMP 18054	36.77	16.64	2.29		n/a	n/a	n/a	n/a
Hyloidea	Dendrobatidae	Epipedobates	Epipedobates darwinwallacei	n/a	16.6	8.1	1	Cisneros-Heredia, Diego F., and Mario H. Yanez-Munoz. "A new poison frog of the genus Epipedobates (Dendrobatoidea: Dendrobatidae) from the north-western Andes of Ecuador." Avances en Ciencias e Ingenierías 2 (2010): 83-86.	n/a	n/a	No	Cisneros-Heredia, Diego F., and Mario H. Yanez-Munoz. "A new poison frog of the genus Epipedobates (Dendrobatoidea: Dendrobatidae) from the north-western Andes of Ecuador." Avances en Ciencias e Ingenierías 2 (2010): 83-86.
Hyloidea	Dendrobatidae	Epipedobates	Epipedobates narinensis	n/a	16.3	7.9	1	Mueses-Cisneros, Jonh Jairo, Belisario Cepeda-Quilindo, and Viviana Moreno-Quintero. "Una nueva especie de Epipedobates (Anura: Dendrobatidae) del suroccidente de Colombia." Papéis Avulsos de Zoologia 48.1 (2008): 1-10.	n/a	n/a	No	Mueses-Cisneros, Jonh Jairo, Belisario Cepeda-Quilindo, and Viviana Moreno-Quintero. "Una nueva especie de Epipedobates (Anura: Dendrobatidae) del suroccidente de Colombia." Papéis Avulsos de Zoologia 48.1 (2008): 1-10.
Hyloidea	Dendrobatidae	Excidobates	Excidobates captivus	n/a	15.4	7	0.9	Myers, Charles W. Spotted Poison Frogs: Descriptions of Three New Dendrobates from Western Amazonia, and Resurrection of a Lost Species from" Chiriqui". American Museum of Natural History, 1982.	5492	Tonini, João Filipe Riva, et al. "Allometric escape from acoustic constraints is rare for frog calls." Ecology and Evolution 10.8 (2020): 3686-3695.	n/a	n/a
Hyloidea	Dendrobatidae	Excidobates	Excidobates condor	n/a	19.8	8.5	1.3	Almendáriz, Ana, Santiago R. Ron, and Jorge Brito. "Una especie nueva de rana venenosa de altura del género Excidobates (Dendrobatoidea: Dendrobatidae) de la Cordillera del Cóndor." Papéis Avulsos de Zoologia 52.32 (2012): 387-399.	n/a	n/a	No	Almendáriz, Ana, Santiago R. Ron, and Jorge Brito. "Una especie nueva de rana venenosa de altura del género Excidobates (Dendrobatoidea: Dendrobatidae) de la Cordillera del Cóndor." Papéis Avulsos de Zoologia 52.32 (2012): 387-399.
Hyloidea	Dendrobatidae	Hyloxalus	Hyloxalus borjai	n/a	20	9.2	1.7	Rivero, Juan A., and Marco A. Serna. "Nuevos Colostethus (Amphibia, Dendrobatidae) del Departamento de Antioquia, Colombia, con la descripción del renacuajo de Colostethus fraterdanieli." Revista de Ecología Latinoamericana 2.1-3 (1995): 45-58.	n/a	n/a	n/a	n/a
Hyloidea	Dendrobatidae	Hyloxalus	Hyloxalus excisus	n/a	24	11.2	1.4	Rivero, Juan A., and Marco A. Serna. "Nuevos Colostethus (Amphibia, Dendrobatidae) del Departamento de Antioquia, Colombia, con la descripción del renacuajo de Colostethus fraterdanieli." Revista de Ecología Latinoamericana 2.1-3 (1995): 45-58.	n/a	n/a	YES	Rivero, Juan A., and Marco A. Serna. "Nuevos Colostethus (Amphibia, Dendrobatidae) del Departamento de Antioquia, Colombia, con la descripción del renacuajo de Colostethus fraterdanieli." Revista de Ecología Latinoamericana 2.1-3 (1995): 45-58.
Hyloidea	Dendrobatidae	Leucostethus	Leucostethus brachistriatus	n/a	22.3	11	2	Rivero, Juan A., and Marco A. Serna. "Dos nuevas especies de Colostethus (Amphibia, Dendrobatidae) de Colombia." Caldasia (1986): 525-531.	n/a	n/a	n/a	n/a
Hyloidea	Dendrobatidae	Leucostethus	Leucostethus jota	n/a	19.3	9.7	1.6	Marin, Carlos M., et al. "A new species of Leucostethus (Anura: Dendrobatidae) from the eastern versant of the Central Cordillera of Colombia and the phylogenetic status of Colostethus fraterdanieli." Zootaxa 4461.3 (2018): 359-380.	4400	Marin, Carlos M., et al. "A new species of Leucostethus (Anura: Dendrobatidae) from the eastern versant of the Central Cordillera of Colombia and the phylogenetic status of Colostethus fraterdanieli." Zootaxa 4461.3 (2018): 359-380.	No	Marin, Carlos M., et al. "A new species of Leucostethus (Anura: Dendrobatidae) from the eastern versant of the Central Cordillera of Colombia and the phylogenetic status of Colostethus fraterdanieli." Zootaxa 4461.3 (2018): 359-380.
Hyloidea	Dendrobatidae	Leucostethus	Leucostethus ramirezi	n/a	22.8	10.5	1.8	Rivero, Juan A., and Marco A. Serna. "Nuevos Colostethus (Amphibia, Dendrobatidae) del Departamento de Antioquia, Colombia, con la descripción del renacuajo de Colostethus fraterdanieli." Revista de Ecología Latinoamericana 2.1-3 (1995): 45-58.	n/a	n/a	n/a	n/a
Hyloidea	Dendrobatidae	Oophaga	Oophaga histrionica	ZUEC-AMP 18751	30.27	14.45	1.77		2746.2	Tonini, João Filipe Riva, et al. "Allometric escape from acoustic constraints is rare for frog calls." Ecology and Evolution 10.8 (2020): 3686-3695.	No	Vargas-Salinas, Fernando, and Adolfo Amézquita. "Stream noise, hybridization, and uncoupled evolution of call traits in two lineages of poison frogs: Oophaga histrionica and Oophaga lehmanni." PloS one 8.10 (2013): e77545.
Hyloidea	Dendrobatidae	Oophaga	Oophaga histrionica	ZUEC-AMP 18794	33.93	14.16	1.87		n/a	n/a	n/a	n/a
Hyloidea	Dendrobatidae	Oophaga	Oophaga pumilio	ZUEC-AMP 19163	19.27	8.83	1.25		5199.3	Tonini, João Filipe Riva, et al. "Allometric escape from acoustic constraints is rare for frog calls." Ecology and Evolution 10.8 (2020): 3686-3695.	No	Folt, Brian, Maureen A. Donnelly, and Craig Guyer. "Spatial patterns of the frog Oophaga pumilio in a plantation system are consistent with conspecific attraction." Ecology and evolution 8.5 (2018): 2880-2889.
Hyloidea	Dendrobatidae	Phyllobates	Phyllobates terribilis	n/a	41.6	18.4	2.5	Myers, Charles W., John W. Daly, and Borys Malkin. "A dangerously toxic new frog (Phyllobates) used by Emberá Indians of western Colombia, with discussion of blowgun fabrication and dart poisoning." (1978): 307-366.	2109	Tonini, João Filipe Riva, et al. "Allometric escape from acoustic constraints is rare for frog calls." Ecology and Evolution 10.8 (2020): 3686-3695.	No	Alzate-Lozano, Stefhania, Rodrigo Lozano-Osorio, and Carlos Galvis. "Parámetros poblacionales de la rana dorada, Phyllobates terribilis (Myers et al., 1978)(Dendrobatidae), en una localidad de Buenaventura, Valle del Cauca, Colombia." Biota colombiana 19.1 (2018): 133-146.
Hyloidea	Dendrobatidae	Phyllobates	Phyllobates vittatus	ZUEC-AMP 18783	25.13	13.29	1.94		3577.2	Tonini, João Filipe Riva, et al. "Allometric escape from acoustic constraints is rare for frog calls." Ecology and Evolution 10.8 (2020): 3686-3695.	YES	van Wijngaarden, René. "Enkele klimaatgegevens en waarnemingen in de biotoop van de gifkikkers Phyllobates vittatus en Dendrobates auratus. Observaciones de campo en el hábitat de Phyllobates vittatus y Dendrobates auratus." Lacerta. 48.5 (1990): 147-154.
Hyloidea	Dendrobatidae	Ranitomeya	Ranitomeya benedicta	n/a	17.5	8.4	1.14	Brown, Jason L., et al. "Revision of the Ranitomeya fantastica species complex with description of two new species from Central Peru (Anura: Dendrobatidae)." Zootaxa 1823.1 (2008): 1-24.	4240	Tonini, João Filipe Riva, et al. "Allometric escape from acoustic constraints is rare for frog calls." Ecology and Evolution 10.8 (2020): 3686-3695.	No	Brown, Jason L., et al. "Revision of the Ranitomeya fantastica species complex with description of two new species from Central Peru (Anura: Dendrobatidae)." Zootaxa 1823.1 (2008): 1-24.
Hyloidea	Dendrobatidae	Ranitomeya	Ranitomeya benedicta	n/a	15	6.8	0.79	Brown, Jason L., et al. "Revision of the Ranitomeya fantastica species complex with description of two new species from Central Peru (Anura: Dendrobatidae)." Zootaxa 1823.1 (2008): 1-24.	n/a	n/a	n/a	n/a
Hyloidea	Dendrobatidae	Ranitomeya	Ranitomeya benedicta	n/a	17.1	7.3	0.71	Brown, Jason L., et al. "Revision of the Ranitomeya fantastica species complex with description of two new species from Central Peru (Anura: Dendrobatidae)." Zootaxa 1823.1 (2008): 1-24.	n/a	n/a	n/a	n/a
Hyloidea	Dendrobatidae	Ranitomeya	Ranitomeya defleri	n/a	15.8	7.4	0.88	Twomey, Evan, and Jason L. Brown. "Another new species of Ranitomeya (Anura: Dendrobatidae) from Amazonian Colombia." Zootaxa 2302.1 (2009): 48-60.	5357	Twomey, Evan, and Jason L. Brown. "Another new species of Ranitomeya (Anura: Dendrobatidae) from Amazonian Colombia." Zootaxa 2302.1 (2009): 48-60.	No	Twomey, Evan, and Jason L. Brown. "Another new species of Ranitomeya (Anura: Dendrobatidae) from Amazonian Colombia." Zootaxa 2302.1 (2009): 48-60.
Hyloidea	Dendrobatidae	Ranitomeya	Ranitomeya sirensis	ZUEC-AMP 10622	16.3	7.07	1.1		4766	Tonini, João Filipe Riva, et al. "Allometric escape from acoustic constraints is rare for frog calls." Ecology and Evolution 10.8 (2020): 3686-3695.	n/a	n/a
Hyloidea	Dendrobatidae	Ranitomeya	Ranitomeya summersi	n/a	19.5	8.5	1	Brown, Jason L., et al. "Revision of the Ranitomeya fantastica species complex with description of two new species from Central Peru (Anura: Dendrobatidae)." Zootaxa 1823.1 (2008): 1-24.	2890	Tonini, João Filipe Riva, et al. "Allometric escape from acoustic constraints is rare for frog calls." Ecology and Evolution 10.8 (2020): 3686-3695.	No	Brown, Jason L., et al. "Revision of the Ranitomeya fantastica species complex with description of two new species from Central Peru (Anura: Dendrobatidae)." Zootaxa 1823.1 (2008): 1-24.
Hyloidea	Dendrobatidae	Ranitomeya	Ranitomeya summersi	n/a	17.5	7.9	1.07	Brown, Jason L., et al. "Revision of the Ranitomeya fantastica species complex with description of two new species from Central Peru (Anura: Dendrobatidae)." Zootaxa 1823.1 (2008): 1-24.	n/a	n/a	n/a	n/a
Hyloidea	Dendrobatidae	Ranitomeya	Ranitomeya vanzolinii	n/a	17.5	7.3	0.8	Myers, Charles W. Spotted Poison Frogs: Descriptions of Three New Dendrobates from Western Amazonia, and Resurrection of a Lost Species from" Chiriqui". American Museum of Natural History, 1982.	n/a	n/a	n/a	n/a
Hyloidea	Dendrobatidae	Ranitomeya	Ranitomeya yavaricola	n/a	16.4	7.3	0.8	Perez-Pena, Pedro E., et al. "Two new species of Ranitomeya (Anura: Dendrobatidae) from eastern Amazonian Peru." Zootaxa 2439.1 (2010): 1-23.	5600	Tonini, João Filipe Riva, et al. "Allometric escape from acoustic constraints is rare for frog calls." Ecology and Evolution 10.8 (2020): 3686-3695.	No	Perez-Pena, Pedro E., et al. "Two new species of Ranitomeya (Anura: Dendrobatidae) from eastern Amazonian Peru." Zootaxa 2439.1 (2010): 1-23.
Hyloidea	Dendrobatidae	Silverstoneia	Silverstoneia dalyi	n/a	16.5	7.4	1.1	Grant, Taran, and Charles W. Myers. "Review of the frog genus Silverstoneia, with descriptions of five new species from the Colombian Chocó (Dendrobatidae: Colostethinae)." American Museum Novitates 2013.3784 (2013): 1-59.	n/a	n/a	n/a	n/a
Hyloidea	Dendrobatidae	Silverstoneia	Silverstoneia erasmios	n/a	21.2	9.5	1.1	Rivero, Juan A., and Marco A. Serna. "Nuevos Colostethus (Amphibia, Dendrobatidae) del Departamento de Antioquia, Colombia, con la descripción del renacuajo de Colostethus fraterdanieli." Revista de Ecología Latinoamericana 2.1-3 (1995): 45-58.	n/a	n/a	No	Rivero, Juan A., and Marco A. Serna. "Nuevos Colostethus (Amphibia, Dendrobatidae) del Departamento de Antioquia, Colombia, con la descripción del renacuajo de Colostethus fraterdanieli." Revista de Ecología Latinoamericana 2.1-3 (1995): 45-58.
Hyloidea	Dendrobatidae	Silverstoneia	Silverstoneia flotator	ZUEC-AMP 18741	14.51	6.72	1.24		2571.7	Tonini, João Filipe Riva, et al. "Allometric escape from acoustic constraints is rare for frog calls." Ecology and Evolution 10.8 (2020): 3686-3695.	n/a	n/a
Hyloidea	Dendrobatidae	Silverstoneia	Silverstoneia gutturalis	n/a	17.1	7.7	1	Grant, Taran, and Charles W. Myers. "Review of the frog genus Silverstoneia, with descriptions of five new species from the Colombian Chocó (Dendrobatidae: Colostethinae)." American Museum Novitates 2013.3784 (2013): 1-59.	n/a	n/a	No	Grant, Taran, and Charles W. Myers. "Review of the frog genus Silverstoneia, with descriptions of five new species from the Colombian Chocó (Dendrobatidae: Colostethinae)." American Museum Novitates 2013.3784 (2013): 1-59.
Hyloidea	Dendrobatidae	Silverstoneia	Silverstoneia minutissima	n/a	14.2	6.4	1.7	Grant, Taran, and Charles W. Myers. "Review of the frog genus Silverstoneia, with descriptions of five new species from the Colombian Chocó (Dendrobatidae: Colostethinae)." American Museum Novitates 2013.3784 (2013): 1-59.	n/a	n/a	No	Grant, Taran, and Charles W. Myers. "Review of the frog genus Silverstoneia, with descriptions of five new species from the Colombian Chocó (Dendrobatidae: Colostethinae)." American Museum Novitates 2013.3784 (2013): 1-59.
Hyloidea	Dicroglossidae	Allopaa	Allopaa barmoachensis	USNM 257534	60.3	n/a	3.7 (vertical)	Khan, M. S., and R. Tasnim. 1989. A new frog of the genus Rana, subgenus Paa, from southwestern Azad Kashmir. Journal of Herpetology 23: 419–423.	n/a	n/a	YES	Khan, M. S., and R. Tasnim. 1989. A new frog of the genus Rana, subgenus Paa, from southwestern Azad Kashmir. Journal of Herpetology 23: 419–423.
Hyloidea	Dicroglossidae	Allopaa	Allopaa hazarensis	MNHNP 1978.3056	55.7	n/a	3.4 (vertical)	Dubois, A., and M. S. Khan. 1979. A new species of frog (genus Rana, subgenus Paa) from northern Pakistan (Amphibia, Anura). Journal of Herpetology 13: 403–410.	n/a	n/a	YES	Dubois, A., and M. S. Khan. 1979. A new species of frog (genus Rana, subgenus Paa) from northern Pakistan (Amphibia, Anura). Journal of Herpetology 13: 403–410.
Hyloidea	Dicroglossidae	Euphlyctis	Euphlyctis karaavali	BNHS 5989	70.9	29.8	6.1	Priti, H., C. R. Naik, K. S. Seshadri, R. Singal, M. K. Vidisha, G. Ravikanth, and K. V. Gururaja. 2016. A new species of Euphlyctis (Amphibia, Anura, Dicroglossidae)from the West Coastal Plains of India. Asian Herpetological Research 7: 229–241.	2677.36	Priti, H., C. R. Naik, K. S. Seshadri, R. Singal, M. K. Vidisha, G. Ravikanth, and K. V. Gururaja. 2016. A new species of Euphlyctis (Amphibia, Anura, Dicroglossidae)from the West Coastal Plains of India. Asian Herpetological Research 7: 229–241.	No	Priti, H., C. R. Naik, K. S. Seshadri, R. Singal, M. K. Vidisha, G. Ravikanth, and K. V. Gururaja. 2016. A new species of Euphlyctis (Amphibia, Anura, Dicroglossidae)from the West Coastal Plains of India. Asian Herpetological Research 7: 229–241.
Hyloidea	Dicroglossidae	Fejervarya	Fejervarya kawamurai	IABHU - F2184	40.5	16.4	2.8	Tjong, D. H., M. Matsui, M. Kuramoto, M. Nishioka, and M. Sumida. 2011. A new species of the Fejervarya limnocharis complex from Japan (Anura, Dicroglossidae). Zoological Science. Tokyo 28: 922–929.	1200	Tjong, D. H., M. Matsui, M. Kuramoto, M. Nishioka, and M. Sumida. 2011. A new species of the Fejervarya limnocharis complex from Japan (Anura, Dicroglossidae). Zoological Science. Tokyo 28: 922–929.	No	Tjong, D. H., M. Matsui, M. Kuramoto, M. Nishioka, and M. Sumida. 2011. A new species of the Fejervarya limnocharis complex from Japan (Anura, Dicroglossidae). Zoological Science. Tokyo 28: 922–929.
Hyloidea	Dicroglossidae	Hoplobatrachus	Hoplobatrachus litoralis	n/a	89.96	45.93	6.24	Hasan, M. K., M. Kuramoto, M. M. Islam, M. S. Alam, M. M. R. Khan, and M. Sumida. 2012. A new species of genus Hoplobatrachus (Anura, Dicroglossidae) from the coastal belt of Bangladesh. Zootaxa 3312: 45–48.	1200	Hasan, M. K., M. Kuramoto, M. M. Islam, M. S. Alam, M. M. R. Khan, and M. Sumida. 2012. A new species of genus Hoplobatrachus (Anura, Dicroglossidae) from the coastal belt of Bangladesh. Zootaxa 3312: 45–48.	No	Hasan, M. K., M. Kuramoto, M. M. Islam, M. S. Alam, M. M. R. Khan, and M. Sumida. 2012. A new species of genus Hoplobatrachus (Anura, Dicroglossidae) from the coastal belt of Bangladesh. Zootaxa 3312: 45–48.
Hyloidea	Dicroglossidae	Ingerana	Ingerana charlesdarwini	WII 12	28.32	12.68	1.96	Chandramouli, S. R. "Rediscovery and redescription of a little known, insular endemic frog, Ingerana charlesdarwini (Das, 1998)(Amphibia: Anura: Dicroglossidae) from the Andaman Islands, Bay of Bengal." Alytes 33 (2016).	n/a	n/a	No	Chandramouli, S. R. "Rediscovery and redescription of a little known, insular endemic frog, Ingerana charlesdarwini (Das, 1998)(Amphibia: Anura: Dicroglossidae) from the Andaman Islands, Bay of Bengal." Alytes 33 (2016).
Hyloidea	Dicroglossidae	Limnonectes	Limnonectes acanthi	n/a	65.1	36.6	4.8	Herr, Mark W., et al. "A New, Morphologically Cryptic Species of Fanged Frog, Genus Limnonectes (Amphibia: Anura: Dicroglossidae), from Mindoro Island, Central Philippines." Ichthyology & Herpetology 109.1 (2021): 188-210.	1467.4	Herr, Mark W., et al. "A New, Morphologically Cryptic Species of Fanged Frog, Genus Limnonectes (Amphibia: Anura: Dicroglossidae), from Mindoro Island, Central Philippines." Ichthyology & Herpetology 109.1 (2021): 188-210.	YES	Herr, Mark W., et al. "A New, Morphologically Cryptic Species of Fanged Frog, Genus Limnonectes (Amphibia: Anura: Dicroglossidae), from Mindoro Island, Central Philippines." Ichthyology & Herpetology 109.1 (2021): 188-210.
Hyloidea	Dicroglossidae	Limnonectes	Limnonectes beloncioi	n/a	69.2	37.6	4.6	Herr, Mark W., et al. "A New, Morphologically Cryptic Species of Fanged Frog, Genus Limnonectes (Amphibia: Anura: Dicroglossidae), from Mindoro Island, Central Philippines." Ichthyology & Herpetology 109.1 (2021): 188-210.	2331.7	Herr, Mark W., et al. "A New, Morphologically Cryptic Species of Fanged Frog, Genus Limnonectes (Amphibia: Anura: Dicroglossidae), from Mindoro Island, Central Philippines." Ichthyology & Herpetology 109.1 (2021): 188-210.	YES	Herr, Mark W., et al. "A New, Morphologically Cryptic Species of Fanged Frog, Genus Limnonectes (Amphibia: Anura: Dicroglossidae), from Mindoro Island, Central Philippines." Ichthyology & Herpetology 109.1 (2021): 188-210.
Hyloidea	Dicroglossidae	Nannophrys	Nannophrys ceylonensis	n/a	27.81	29.8	3.9	Rodirigo, Roshan K. "A new species of endemic frog belonging to genus Nannophrys Günther, 1869 (Anura: Dicroglossinae) from Sri Lanka." Zootaxa 1403 (2007): 55-68.	n/a	n/a	n/a	n/a
Hyloidea	Dicroglossidae	Nannophrys	Nannophrys marmorata	n/a	42.33	44	7.5	Rodirigo, Roshan K. "A new species of endemic frog belonging to genus Nannophrys Günther, 1869 (Anura: Dicroglossinae) from Sri Lanka." Zootaxa 1403 (2007): 55-68.	n/a	n/a	n/a	n/a
Hyloidea	Dicroglossidae	Nannophrys	Nannophrys naeyakay	n/a	30.11	29.8	5.5	Rodirigo, Roshan K. "A new species of endemic frog belonging to genus Nannophrys Günther, 1869 (Anura: Dicroglossinae) from Sri Lanka." Zootaxa 1403 (2007): 55-68.	n/a	n/a	No	Rodirigo, Roshan K. "A new species of endemic frog belonging to genus Nannophrys Günther, 1869 (Anura: Dicroglossinae) from Sri Lanka." Zootaxa 1403 (2007): 55-68.
Hyloidea	Dicroglossidae	Nanorana	Nanorana kangxianensis	n/a	55.9	26.6	2.6	Yang, Xin, et al. "A new species of the genus Feirana (Amphibia: Anura: Dicroglossidae) from the western Qinling Mountains of China." Asian Herpetol Res 2.2 (2011): 72-86.	n/a	n/a	YES	Yang, Xin, et al. "A new species of the genus Feirana (Amphibia: Anura: Dicroglossidae) from the western Qinling Mountains of China." Asian Herpetol Res 2.2 (2011): 72-86.
Hyloidea	Dicroglossidae	Nanorana	Nanorana quadranus	n/a	53.3	29.58	2.33	Yang, Xin, et al. "A new species of the genus Feirana (Amphibia: Anura: Dicroglossidae) from the western Qinling Mountains of China." Asian Herpetol Res 2.2 (2011): 72-86.	n/a	n/a	n/a	n/a
Hyloidea	Dicroglossidae	Nanorana	Nanorana taihangnica	n/a	53.5	25.32	2.38	Yang, Xin, et al. "A new species of the genus Feirana (Amphibia: Anura: Dicroglossidae) from the western Qinling Mountains of China." Asian Herpetol Res 2.2 (2011): 72-86.	n/a	n/a	n/a	n/a
Hyloidea	Dicroglossidae	Occidozyga	Occidozyga magnapustulosa	n/a	17.91	7.1	1.4	Köhler, Gunther, et al. "A taxonomic revision of the genus Phrynoglossus in Indochina with the description of a new species and comments on the classification within Occidozyginae (Amphibia, Anura, Dicroglossidae)." Vertebrate Zoology 71 (2021): 1.	n/a	n/a	No	Köhler, Gunther, et al. "A taxonomic revision of the genus Phrynoglossus in Indochina with the description of a new species and comments on the classification within Occidozyginae (Amphibia, Anura, Dicroglossidae)." Vertebrate Zoology 71 (2021): 1.
Hyloidea	Dicroglossidae	Occidozyga	Occidozyga martensi	n/a	21.42	9.1	0.8	Köhler, Gunther, et al. "A taxonomic revision of the genus Phrynoglossus in Indochina with the description of a new species and comments on the classification within Occidozyginae (Amphibia, Anura, Dicroglossidae)." Vertebrate Zoology 71 (2021): 1.	n/a	n/a	No	Köhler, Gunther, et al. "A taxonomic revision of the genus Phrynoglossus in Indochina with the description of a new species and comments on the classification within Occidozyginae (Amphibia, Anura, Dicroglossidae)." Vertebrate Zoology 71 (2021): 1.
Hyloidea	Dicroglossidae	Occidozyga	Occidozyga myanhenssei	n/a	24.06	19.6	1.2	Köhler, Gunther, et al. "A taxonomic revision of the genus Phrynoglossus in Indochina with the description of a new species and comments on the classification within Occidozyginae (Amphibia, Anura, Dicroglossidae)." Vertebrate Zoology 71 (2021): 1.	n/a	n/a	No	Köhler, Gunther, et al. "A taxonomic revision of the genus Phrynoglossus in Indochina with the description of a new species and comments on the classification within Occidozyginae (Amphibia, Anura, Dicroglossidae)." Vertebrate Zoology 71 (2021): 1.
Hyloidea	Dicroglossidae	Quasipaa	Quasipaa acanthophora	n/a	92.1	48.9	Tympanum indistinct	Dubois, A., and A. Ohler. 2009. A new species of the genus Quasipaa (Anura, Ranidae, Dicroglossinae) from northern Vietnam. Alytes. Paris 27: 49–61.	n/a	n/a	n/a	n/a
Hyloidea	Dicroglossidae	Sphaerotheca	Sphaerotheca leucorhynchus	CCB	35	13.5	3.5	Rao, C. R. N. 1937. On some new forms of Batrachia from S. India. Proceedings of the Indian Academy of Sciences. Section B 6: 387–427.	n/a	n/a	n/a	n/a
Hyloidea	Hemiphractidae	Cryptobatrachus	Cryptobatrachus conditus	ICN33572	42.6	27.5	4.3	Lynch, J. D. 2008. A taxonomic revision of frogs of the genus Cryptobatrachus (Anura: Hemiphractidae). Zootaxa 1883: 28–68.	n/a	n/a	n/a	n/a
Hyloidea	Hemiphractidae	Cryptobatrachus	Cryptobatrachus pedroruizi	ICN38716	44.5	27.9	4.2	Lynch, J. D. 2008. A taxonomic revision of frogs of the genus Cryptobatrachus (Anura: Hemiphractidae). Zootaxa 1883: 28–68.	n/a	n/a	n/a	n/a
Hyloidea	Hemiphractidae	Cryptobatrachus	Cryptobatrachus remotus	n/a	39.7	24.3	3.2	Infante-Rivero, E. E., F. J. M. Rojas-Runjaic, and C. L. Barrio-Amorós. 2009 "2008". Un nuevo Cryptobatrachus Ruthven, 1916 (Anura, Cryptobatrachidae) de la vertiente venezolana de la sierra de Perijá. Memoria de la Fundación La Salle de Ciencias Naturales. Caracas 169: 45–63.	n/a	n/a	YES	Infante-Rivero, E. E., F. J. M. Rojas-Runjaic, and C. L. Barrio-Amorós. 2009 "2008". Un nuevo Cryptobatrachus Ruthven, 1916 (Anura, Cryptobatrachidae) de la vertiente venezolana de la sierra de Perijá. Memoria de la Fundación La Salle de Ciencias Naturales. Caracas 169: 45–63.
Hyloidea	Hemiphractidae	Cryptobatrachus	Cryptobatrachus ruthveni	ICN7147	43.9	25.5	3.3	Lynch, J. D. 2008. A taxonomic revision of frogs of the genus Cryptobatrachus (Anura: Hemiphractidae). Zootaxa 1883: 28–68.	n/a	n/a	n/a	n/a
Hyloidea	Hemiphractidae	Fritziana	Fritziana izecksohni	n/a	25.9	14.3	1.6	Folly, M., F. S. F. dos S. Hepp, and S. P. de Carvalho-e-Silva. 2018. A new bromeligenous species of Fritziana Mello-Leitão, 1937 (Amphibia: Anura: Hemiphractidae) from High Elevations in the Serra Dos Órgãos, Rio de Janeiro, Brazil. Herpetologica 74: 58–72.	n/a	n/a	No	Folly, M., F. S. F. dos S. Hepp, and S. P. de Carvalho-e-Silva. 2018. A new bromeligenous species of Fritziana Mello-Leitão, 1937 (Amphibia: Anura: Hemiphractidae) from High Elevations in the Serra Dos Órgãos, Rio de Janeiro, Brazil. Herpetologica 74: 58–72.
Hyloidea	Hemiphractidae	Fritziana	Fritziana mitus	n/a	16.16	10.68	0.84	Walker, M., M. Wachlevski, P. Nogueira da Costa, P. Nogueira-Costa, P. C. de A. Garcia, and C. F. B. Haddad. 2018. A new species of Fritziana Mello-Leitão 1937 (Amphibia: Anura: Hemiphractidae) from the Atlantic Forest, Brazil. Herpetologica 74: 329–341.	n/a	n/a	No	Walker, M., M. Wachlevski, P. Nogueira da Costa, P. Nogueira-Costa, P. C. de A. Garcia, and C. F. B. Haddad. 2018. A new species of Fritziana Mello-Leitão 1937 (Amphibia: Anura: Hemiphractidae) from the Atlantic Forest, Brazil. Herpetologica 74: 329–341.
Hyloidea	Hemiphractidae	Fritziana	Fritziana tonimi	n/a	23.67	11.63	0.91	Walker, M., J. L. Gasparini, and C. F. B. Haddad. 2016. A new polymorphic species of egg-brooding frog of the genus Fritziana from southeastern Brazil (Anura: Hemiphractidae). Salamandra 52: 221–229.	n/a	n/a	n/a	n/a
Hyloidea	Hemiphractidae	Gastrotheca	Gastrotheca aguaruna	n/a	45.1	21.8	2.9	Duellman, W. E., A. J. Barley, and P. J. Venegas. 2014. Cryptic species diversity in marsupial frogs (Anura: Hemiphractidae: Gastrotheca) in the Andes of northern Peru . Zootaxa 3768: 159–177.	n/a	n/a	No	Duellman, W. E., A. J. Barley, and P. J. Venegas. 2014. Cryptic species diversity in marsupial frogs (Anura: Hemiphractidae: Gastrotheca) in the Andes of northern Peru . Zootaxa 3768: 159–177.
Hyloidea	Hemiphractidae	Gastrotheca	Gastrotheca aratia	n/a	48.1	22.4	3.6	Duellman, W. E., A. J. Barley, and P. J. Venegas. 2014. Cryptic species diversity in marsupial frogs (Anura: Hemiphractidae: Gastrotheca) in the Andes of northern Peru . Zootaxa 3768: 159–177.	n/a	n/a	No	Duellman, W. E., A. J. Barley, and P. J. Venegas. 2014. Cryptic species diversity in marsupial frogs (Anura: Hemiphractidae: Gastrotheca) in the Andes of northern Peru . Zootaxa 3768: 159–177.
Hyloidea	Hemiphractidae	Gastrotheca	Gastrotheca cuencana	CJ 1391	50.4	21.9	2.8	Carvajal-Endara, S., L. A. Coloma, M. A. Morales-Mite, J. M. Guayasamin, P. Székely, and W. E. Duellman. 2019. Phylogenetic systematics, ecology, and conservation of marsupial frogs (Anura: Hemiphractidae) from the Andes of southern Ecuador, with descriptions of four new biphasic species. Zootaxa 4562: 1–102.	1147.9	Carvajal-Endara, S., L. A. Coloma, M. A. Morales-Mite, J. M. Guayasamin, P. Székely, and W. E. Duellman. 2019. Phylogenetic systematics, ecology, and conservation of marsupial frogs (Anura: Hemiphractidae) from the Andes of southern Ecuador, with descriptions of four new biphasic species. Zootaxa 4562: 1–102.	No	Carvajal-Endara, S., L. A. Coloma, M. A. Morales-Mite, J. M. Guayasamin, P. Székely, and W. E. Duellman. 2019. Phylogenetic systematics, ecology, and conservation of marsupial frogs (Anura: Hemiphractidae) from the Andes of southern Ecuador, with descriptions of four new biphasic species. Zootaxa 4562: 1–102.
Hyloidea	Hemiphractidae	Gastrotheca	Gastrotheca elicioi	n/a	56	26.4	3.5	Carvajal-Endara, S., L. A. Coloma, M. A. Morales-Mite, J. M. Guayasamin, P. Székely, and W. E. Duellman. 2019. Phylogenetic systematics, ecology, and conservation of marsupial frogs (Anura: Hemiphractidae) from the Andes of southern Ecuador, with descriptions of four new biphasic species. Zootaxa 4562: 1–102.	1249.4	Carvajal-Endara, S., L. A. Coloma, M. A. Morales-Mite, J. M. Guayasamin, P. Székely, and W. E. Duellman. 2019. Phylogenetic systematics, ecology, and conservation of marsupial frogs (Anura: Hemiphractidae) from the Andes of southern Ecuador, with descriptions of four new biphasic species. Zootaxa 4562: 1–102.	n/a	n/a
Hyloidea	Hemiphractidae	Gastrotheca	Gastrotheca litonedis	n/a	53.8	25.9	3.5	Carvajal-Endara, S., L. A. Coloma, M. A. Morales-Mite, J. M. Guayasamin, P. Székely, and W. E. Duellman. 2019. Phylogenetic systematics, ecology, and conservation of marsupial frogs (Anura: Hemiphractidae) from the Andes of southern Ecuador, with descriptions of four new biphasic species. Zootaxa 4562: 1–102.	1224	Carvajal-Endara, S., L. A. Coloma, M. A. Morales-Mite, J. M. Guayasamin, P. Székely, and W. E. Duellman. 2019. Phylogenetic systematics, ecology, and conservation of marsupial frogs (Anura: Hemiphractidae) from the Andes of southern Ecuador, with descriptions of four new biphasic species. Zootaxa 4562: 1–102.	n/a	n/a
Hyloidea	Hemiphractidae	Gastrotheca	Gastrotheca lojana	n/a	49.4	31.2	3.5	Carvajal-Endara, S., L. A. Coloma, M. A. Morales-Mite, J. M. Guayasamin, P. Székely, and W. E. Duellman. 2019. Phylogenetic systematics, ecology, and conservation of marsupial frogs (Anura: Hemiphractidae) from the Andes of southern Ecuador, with descriptions of four new biphasic species. Zootaxa 4562: 1–102.	1118.1	Carvajal-Endara, S., L. A. Coloma, M. A. Morales-Mite, J. M. Guayasamin, P. Székely, and W. E. Duellman. 2019. Phylogenetic systematics, ecology, and conservation of marsupial frogs (Anura: Hemiphractidae) from the Andes of southern Ecuador, with descriptions of four new biphasic species. Zootaxa 4562: 1–102.	n/a	n/a
Hyloidea	Hemiphractidae	Gastrotheca	Gastrotheca monticola	n/a	58.1	27.1	3.15	Carvajal-Endara, S., L. A. Coloma, M. A. Morales-Mite, J. M. Guayasamin, P. Székely, and W. E. Duellman. 2019. Phylogenetic systematics, ecology, and conservation of marsupial frogs (Anura: Hemiphractidae) from the Andes of southern Ecuador, with descriptions of four new biphasic species. Zootaxa 4562: 1–102.	n/a	n/a	n/a	n/a
Hyloidea	Hemiphractidae	Gastrotheca	Gastrotheca pseustes	n/a	58.8	25.4	3.8	Carvajal-Endara, S., L. A. Coloma, M. A. Morales-Mite, J. M. Guayasamin, P. Székely, and W. E. Duellman. 2019. Phylogenetic systematics, ecology, and conservation of marsupial frogs (Anura: Hemiphractidae) from the Andes of southern Ecuador, with descriptions of four new biphasic species. Zootaxa 4562: 1–102.	1359	Carvajal-Endara, S., L. A. Coloma, M. A. Morales-Mite, J. M. Guayasamin, P. Székely, and W. E. Duellman. 2019. Phylogenetic systematics, ecology, and conservation of marsupial frogs (Anura: Hemiphractidae) from the Andes of southern Ecuador, with descriptions of four new biphasic species. Zootaxa 4562: 1–102.	n/a	n/a
Hyloidea	Hemiphractidae	Gastrotheca	Gastrotheca turnerorum	n/a	52.7	22.3	2.7	Carvajal-Endara, S., L. A. Coloma, M. A. Morales-Mite, J. M. Guayasamin, P. Székely, and W. E. Duellman. 2019. Phylogenetic systematics, ecology, and conservation of marsupial frogs (Anura: Hemiphractidae) from the Andes of southern Ecuador, with descriptions of four new biphasic species. Zootaxa 4562: 1–102.	n/a	n/a	n/a	n/a
Hyloidea	Hemiphractidae	Gastrotheca	Gastrotheca yacuri	n/a	53	27.6	2.9	Carvajal-Endara, S., L. A. Coloma, M. A. Morales-Mite, J. M. Guayasamin, P. Székely, and W. E. Duellman. 2019. Phylogenetic systematics, ecology, and conservation of marsupial frogs (Anura: Hemiphractidae) from the Andes of southern Ecuador, with descriptions of four new biphasic species. Zootaxa 4562: 1–102.	1496.7	Carvajal-Endara, S., L. A. Coloma, M. A. Morales-Mite, J. M. Guayasamin, P. Székely, and W. E. Duellman. 2019. Phylogenetic systematics, ecology, and conservation of marsupial frogs (Anura: Hemiphractidae) from the Andes of southern Ecuador, with descriptions of four new biphasic species. Zootaxa 4562: 1–102.	n/a	n/a
Hyloidea	Hemiphractidae	Hemiphractus	Hemiphractus elioti	UTACV A-64827	40.5	22.3	3.8	Hill, R. L., K. G. Martin, E. L. Stanley, and J. R. Mendelson, III. 2018. A taxonomic review of the genus Hemiphractus (Anura: Hemiphractidae) in Panama: Description of Two New Species, Resurrection of Hemiphractus panamensis (Stejneger, 1917), and discussion of Hemiphractus fasciatus Peters, 1862 . Zootaxa 4429: 495–512.	n/a	n/a	No	Hill, R. L., K. G. Martin, E. L. Stanley, and J. R. Mendelson, III. 2018. A taxonomic review of the genus Hemiphractus (Anura: Hemiphractidae) in Panama: Description of Two New Species, Resurrection of Hemiphractus panamensis (Stejneger, 1917), and discussion of Hemiphractus fasciatus Peters, 1862 . Zootaxa 4429: 495–512.
Hyloidea	Hemiphractidae	Hemiphractus	Hemiphractus helioi	KU 163304	52.7	27.3	4.7	Sheil, C. A., and J. R. Mendelson, III. 2001. A new species of Hemiphractus (Anura: Hylidae: Hemiphractinae), and a redescription of H. johnsoni. Herpetologica 57: 189–202.	n/a	n/a	No	Sheil, C. A., and J. R. Mendelson, III. 2001. A new species of Hemiphractus (Anura: Hylidae: Hemiphractinae), and a redescription of H. johnsoni. Herpetologica 57: 189–202.
Hyloidea	Hemiphractidae	Hemiphractus	Hemiphractus kaylockae	n/a	50.5	26.7	4	Hill, R. L., K. G. Martin, E. L. Stanley, and J. R. Mendelson, III. 2018. A taxonomic review of the genus Hemiphractus (Anura: Hemiphractidae) in Panama: Description of Two New Species, Resurrection of Hemiphractus panamensis (Stejneger, 1917), and discussion of Hemiphractus fasciatus Peters, 1862 . Zootaxa 4429: 495–512.	n/a	n/a	No	Hill, R. L., K. G. Martin, E. L. Stanley, and J. R. Mendelson, III. 2018. A taxonomic review of the genus Hemiphractus (Anura: Hemiphractidae) in Panama: Description of Two New Species, Resurrection of Hemiphractus panamensis (Stejneger, 1917), and discussion of Hemiphractus fasciatus Peters, 1862 . Zootaxa 4429: 495–512.
Hyloidea	Hemiphractidae	Hemiphractus	Hemiphractus panamensis	n/a	40.4	23.9	3.3	Hill, R. L., K. G. Martin, E. L. Stanley, and J. R. Mendelson, III. 2018. A taxonomic review of the genus Hemiphractus (Anura: Hemiphractidae) in Panama: Description of Two New Species, Resurrection of Hemiphractus panamensis (Stejneger, 1917), and discussion of Hemiphractus fasciatus Peters, 1862 . Zootaxa 4429: 495–512.	n/a	n/a	No	Hill, R. L., K. G. Martin, E. L. Stanley, and J. R. Mendelson, III. 2018. A taxonomic review of the genus Hemiphractus (Anura: Hemiphractidae) in Panama: Description of Two New Species, Resurrection of Hemiphractus panamensis (Stejneger, 1917), and discussion of Hemiphractus fasciatus Peters, 1862 . Zootaxa 4429: 495–512.
Hyloidea	Hemiphractidae	Stefania	Stefania neblinae	INPA-H 17758	45	30.24	1.05	Carvalho, V. T. de, R. D. MacCulloch, L. Bonora, and R. C. Vogt. 2010. New Species of Stefania (Anura: Cryptobatrachidae) from northern Amazonas, Brazil. Journal of Herpetology 44: 229–235.	n/a	n/a	No	Carvalho, V. T. de, R. D. MacCulloch, L. Bonora, and R. C. Vogt. 2010. New Species of Stefania (Anura: Cryptobatrachidae) from northern Amazonas, Brazil. Journal of Herpetology 44: 229–235.
Hyloidea	Hemiphractidae	Stefania	Stefania tamacuarina	n/a	50	30	3.5	Myers, Charles W., and Maureen A. Donnelly. "A tepui herpetofauna on a granitic mountain (Tamacuari) in the borderland between Venezuela and Brazil: report from the Phipps Tapirapecó Expedition. American Museum novitates; no. 3213." (1997).	n/a	n/a	YES	Myers, Charles W., and Maureen A. Donnelly. "A tepui herpetofauna on a granitic mountain (Tamacuari) in the borderland between Venezuela and Brazil: report from the Phipps Tapirapecó Expedition. American Museum novitates; no. 3213." (1997).
Hyloidea	Hemisotidae	Hemisus	Hemisus barotseensis	NMZB 16191	30	n/a	Tympanum indistinct	Channing, A., and D. G. Broadley. 2002. A new snout-burrower from the Barotse Floodplain (Anura: Hemisotidae: Hemisus). Journal of Herpetology 36: 367–372.	4300	Channing, A., and D. G. Broadley. 2002. A new snout-burrower from the Barotse Floodplain (Anura: Hemisotidae: Hemisus). Journal of Herpetology 36: 367–372.	No	Channing, A., and D. G. Broadley. 2002. A new snout-burrower from the Barotse Floodplain (Anura: Hemisotidae: Hemisus). Journal of Herpetology 36: 367–372.
Hyloidea	Hylidae	Acris	Acris blanchardi	n/a	24.2	n/a	1.53	James, Taylor, Hunter, Ryan. 2021. Evolutionary and allometric insights into anuran auditory sensitivity and morphology. Brain, Behavior and Evolution.	3150	James, Taylor, Hunter, Ryan. 2021. Evolutionary and allometric insights into anuran auditory sensitivity and morphology. Brain, Behavior and Evolution.	n/a	n/a
Hyloidea	Hylidae	Acris	Acris crepitans	n/a	22.7	n/a	1.39	James, Taylor, Hunter, Ryan. 2021. Evolutionary and allometric insights into anuran auditory sensitivity and morphology. Brain, Behavior and Evolution.	3733	James, Taylor, Hunter, Ryan. 2021. Evolutionary and allometric insights into anuran auditory sensitivity and morphology. Brain, Behavior and Evolution.	n/a	n/a
Hyloidea	Hylidae	Aplastodiscus	Aplastodiscus albofrenatus	ZUEC-AMP 2032	35.38	19.05	2.54		1317	Tonini, João Filipe Riva, et al. "Allometric escape from acoustic constraints is rare for frog calls." Ecology and Evolution 10.8 (2020): 3686-3695.	No	Haddad, C. F. B., Toledo, L. F., Prado, C. P. A., Loebmann, D., Gasparini, J. L., Sazima, I. 2013. Guia dos Anfíbios da Mata Atlântica - Diversidade e Biologia / Guide to the Amphibians of the Atlantic Forest: Diversity and Biology. Anolis Books Editora, 1st Edition. São Paulo, Brazil. 550p.
Hyloidea	Hylidae	Aplastodiscus	Aplastodiscus albofrenatus	ZUEC-AMP 6639	35.57	17.8	2.23		n/a	n/a	n/a	n/a
Hyloidea	Hylidae	Aplastodiscus	Aplastodiscus albofrenatus	ZUEC-AMP 6798	38.29	18.34	2.83		n/a	n/a	n/a	n/a
Hyloidea	Hylidae	Aplastodiscus	Aplastodiscus albosignatus	ZUEC-AMP 6931	46.1	22.7	2.45		2630	Tonini, João Filipe Riva, et al. "Allometric escape from acoustic constraints is rare for frog calls." Ecology and Evolution 10.8 (2020): 3686-3695.	n/a	n/a
Hyloidea	Hylidae	Aplastodiscus	Aplastodiscus albosignatus	ZUEC-AMP 6933	45.44	22.28	2.5		n/a	n/a	n/a	n/a
Hyloidea	Hylidae	Aplastodiscus	Aplastodiscus albosignatus	ZUEC-AMP 6935	46.58	21.95	2.52		n/a	n/a	No	Haddad, C. F. B., Toledo, L. F., Prado, C. P. A., Loebmann, D., Gasparini, J. L., Sazima, I. 2013. Guia dos Anfíbios da Mata Atlântica - Diversidade e Biologia / Guide to the Amphibians of the Atlantic Forest: Diversity and Biology. Anolis Books Editora, 1st Edition. São Paulo, Brazil. 550p.
Hyloidea	Hylidae	Aplastodiscus	Aplastodiscus arildae	ZUEC-AMP 7046	40.29	20.38	2.21		2413	Tonini, João Filipe Riva, et al. "Allometric escape from acoustic constraints is rare for frog calls." Ecology and Evolution 10.8 (2020): 3686-3695.	No	Haddad, C. F. B., Toledo, L. F., Prado, C. P. A., Loebmann, D., Gasparini, J. L., Sazima, I. 2013. Guia dos Anfíbios da Mata Atlântica - Diversidade e Biologia / Guide to the Amphibians of the Atlantic Forest: Diversity and Biology. Anolis Books Editora, 1st Edition. São Paulo, Brazil. 550p.
Hyloidea	Hylidae	Aplastodiscus	Aplastodiscus arildae	ZUEC-AMP 6314	41.88	20.54	2.21		n/a	n/a	n/a	n/a
Hyloidea	Hylidae	Aplastodiscus	Aplastodiscus arildae	ZUEC-AMP 6909	38.97	19.56	2.03		n/a	n/a	n/a	n/a
Hyloidea	Hylidae	Aplastodiscus	Aplastodiscus arildae	ZUEC-AMP 7827	33.75	17.64	1.97		n/a	n/a	n/a	n/a
Hyloidea	Hylidae	Aplastodiscus	Aplastodiscus arildae	ZUEC-AMP 23298	35.9	19.48	2.15		n/a	n/a	n/a	n/a
Hyloidea	Hylidae	Aplastodiscus	Aplastodiscus cavicola	ZUEC-AMP 6636	33.62	17.54	2.57		700	Tonini, João Filipe Riva, et al. "Allometric escape from acoustic constraints is rare for frog calls." Ecology and Evolution 10.8 (2020): 3686-3695.	No	Haddad, C. F. B., Toledo, L. F., Prado, C. P. A., Loebmann, D., Gasparini, J. L., Sazima, I. 2013. Guia dos Anfíbios da Mata Atlântica - Diversidade e Biologia / Guide to the Amphibians of the Atlantic Forest: Diversity and Biology. Anolis Books Editora, 1st Edition. São Paulo, Brazil. 550p.
Hyloidea	Hylidae	Aplastodiscus	Aplastodiscus cavicola	ZUEC-AMP 6637	31.9	16.87	2.57		n/a	n/a	n/a	n/a
Hyloidea	Hylidae	Aplastodiscus	Aplastodiscus cavicola	ZUEC-AMP 16119	35.84	17.45	2.82		n/a	n/a	n/a	n/a
Hyloidea	Hylidae	Aplastodiscus	Aplastodiscus cochranae	ZUEC-AMP 10510	44.18	21.46	2.63		n/a	n/a	No	Haddad, C. F. B., Toledo, L. F., Prado, C. P. A., Loebmann, D., Gasparini, J. L., Sazima, I. 2013. Guia dos Anfíbios da Mata Atlântica - Diversidade e Biologia / Guide to the Amphibians of the Atlantic Forest: Diversity and Biology. Anolis Books Editora, 1st Edition. São Paulo, Brazil. 550p.
Hyloidea	Hylidae	Aplastodiscus	Aplastodiscus ehrhardti	ZUEC-AMP 6949	31.23	15.76	2.22		n/a	n/a	No	Haddad, C. F. B., Toledo, L. F., Prado, C. P. A., Loebmann, D., Gasparini, J. L., Sazima, I. 2013. Guia dos Anfíbios da Mata Atlântica - Diversidade e Biologia / Guide to the Amphibians of the Atlantic Forest: Diversity and Biology. Anolis Books Editora, 1st Edition. São Paulo, Brazil. 550p.
Hyloidea	Hylidae	Aplastodiscus	Aplastodiscus ehrhardti	ZUEC-AMP 6950	32.21	15.73	2.07		n/a	n/a	n/a	n/a
Hyloidea	Hylidae	Aplastodiscus	Aplastodiscus eugenioi	ZUEC-AMP 18224	31.21	16.6	1.89		2300	Tonini, João Filipe Riva, et al. "Allometric escape from acoustic constraints is rare for frog calls." Ecology and Evolution 10.8 (2020): 3686-3695.	No	Haddad, C. F. B., Toledo, L. F., Prado, C. P. A., Loebmann, D., Gasparini, J. L., Sazima, I. 2013. Guia dos Anfíbios da Mata Atlântica - Diversidade e Biologia / Guide to the Amphibians of the Atlantic Forest: Diversity and Biology. Anolis Books Editora, 1st Edition. São Paulo, Brazil. 550p.
Hyloidea	Hylidae	Aplastodiscus	Aplastodiscus eugenioi	ZUEC-AMP 8998	31.31	16.52	1.62		n/a	n/a	n/a	n/a
Hyloidea	Hylidae	Aplastodiscus	Aplastodiscus eugenioi	ZUEC-AMP 18223	32.62	17.84	1.7		n/a	n/a	n/a	n/a
Hyloidea	Hylidae	Aplastodiscus	Aplastodiscus eugenioi	n/a	36.16	10.6	2.06		n/a	n/a	n/a	n/a
Hyloidea	Hylidae	Aplastodiscus	Aplastodiscus eugenioi	n/a	35.29	10.2	1.69		n/a	n/a	n/a	n/a
Hyloidea	Hylidae	Aplastodiscus	Aplastodiscus eugenioi	n/a	36.12	10.86	1.91		n/a	n/a	n/a	n/a
Hyloidea	Hylidae	Aplastodiscus	Aplastodiscus eugenioi	n/a	36.19	10.36	1.83		n/a	n/a	n/a	n/a
Hyloidea	Hylidae	Aplastodiscus	Aplastodiscus eugenioi	n/a	34.66	9.02	1.94		n/a	n/a	n/a	n/a
Hyloidea	Hylidae	Aplastodiscus	Aplastodiscus eugenioi	n/a	34.03	10.51	1.59		n/a	n/a	n/a	n/a
Hyloidea	Hylidae	Aplastodiscus	Aplastodiscus eugenioi	n/a	35.62	10.64	2.02		n/a	n/a	n/a	n/a
Hyloidea	Hylidae	Aplastodiscus	Aplastodiscus ibirapitanga	ZUEC-AMP 16627	34.58	17.71	2.48		820	Tonini, João Filipe Riva, et al. "Allometric escape from acoustic constraints is rare for frog calls." Ecology and Evolution 10.8 (2020): 3686-3695.	No	Haddad, C. F. B., Toledo, L. F., Prado, C. P. A., Loebmann, D., Gasparini, J. L., Sazima, I. 2013. Guia dos Anfíbios da Mata Atlântica - Diversidade e Biologia / Guide to the Amphibians of the Atlantic Forest: Diversity and Biology. Anolis Books Editora, 1st Edition. São Paulo, Brazil. 550p.
Hyloidea	Hylidae	Aplastodiscus	Aplastodiscus ibirapitanga	n/a	41	21.7	3	CRUZ, Carlos Alberto Gonçalves; PIMENTA, Bruno Vergueira Silva; SILVANO, Débora Leite. Duas novas espécies Pertencentes ao complexo de Hyla Albosignata Lutz & Lutz, 1938, do Leste do Brasil:(Amphibia, Anura, Hylidae). Oficina Gráfica da Univ. do Brasil, 2003.	n/a	n/a	n/a	n/a
Hyloidea	Hylidae	Aplastodiscus	Aplastodiscus leucopygius	ZUEC-AMP 4407	41.03	19.85	2.52		2410	Tonini, João Filipe Riva, et al. "Allometric escape from acoustic constraints is rare for frog calls." Ecology and Evolution 10.8 (2020): 3686-3695.	No	Zina, Juliana, and Célio FB Haddad. "Ecology and reproductive biology of two species of Aplastodiscus (Anura: Hylidae) in the Atlantic forest, Brazil." Journal of Natural History 40.29-31 (2006): 1831-1840.
Hyloidea	Hylidae	Aplastodiscus	Aplastodiscus leucopygius	ZUEC-AMP 7048	42.2	21.62	2.42		n/a	n/a	n/a	n/a
Hyloidea	Hylidae	Aplastodiscus	Aplastodiscus leucopygius	ZUEC-AMP 10918	37.17	19.22	2.25		n/a	n/a	n/a	n/a
Hyloidea	Hylidae	Aplastodiscus	Aplastodiscus lutzorum	n/a	34.6	15.8	2.1	Berneck, Bianca VM, et al. "The first species of Aplastodiscus endemic to the Brazilian Cerrado (Anura, Hylidae)." ZooKeys642 (2017): 115.	2027	Berneck, Bianca VM, et al. "The first species of Aplastodiscus endemic to the Brazilian Cerrado (Anura, Hylidae)." ZooKeys642 (2017): 115.	YES	Berneck, Bianca VM, et al. "The first species of Aplastodiscus endemic to the Brazilian Cerrado (Anura, Hylidae)." ZooKeys642 (2017): 115.
Hyloidea	Hylidae	Aplastodiscus	Aplastodiscus musicus	ZUEC-AMP 4120	45.53	23.27	2.44		n/a	n/a	n/a	n/a
Hyloidea	Hylidae	Aplastodiscus	Aplastodiscus musicus	ZUEC-AMP 11353	44.31	22.11	2.3		n/a	n/a	n/a	n/a
Hyloidea	Hylidae	Aplastodiscus	Aplastodiscus perviridis	ZUEC-AMP 10972	38	18.16	2.02		2300	Tonini, João Filipe Riva, et al. "Allometric escape from acoustic constraints is rare for frog calls." Ecology and Evolution 10.8 (2020): 3686-3695.	No	Haddad, C. F. B., Toledo, L. F., Prado, C. P. A., Loebmann, D., Gasparini, J. L., Sazima, I. 2013. Guia dos Anfíbios da Mata Atlântica - Diversidade e Biologia / Guide to the Amphibians of the Atlantic Forest: Diversity and Biology. Anolis Books Editora, 1st Edition. São Paulo, Brazil. 550p.
Hyloidea	Hylidae	Aplastodiscus	Aplastodiscus perviridis	ZUEC-AMP 4253	34.79	15.88	2.21		n/a	n/a	n/a	n/a
Hyloidea	Hylidae	Aplastodiscus	Aplastodiscus perviridis	ZUEC-AMP 4955	38.53	18.75	2.4		n/a	n/a	n/a	n/a
Hyloidea	Hylidae	Aplastodiscus	Aplastodiscus sibilatus	n/a	30.8	15.9	1.8	CRUZ, Carlos Alberto Gonçalves; PIMENTA, Bruno Vergueira Silva; SILVANO, Débora Leite. Duas novas espécies Pertencentes ao complexo de Hyla Albosignata Lutz & Lutz, 1938, do Leste do Brasil:(Amphibia, Anura, Hylidae). Oficina Gráfica da Univ. do Brasil, 2003.	2440	Tonini, João Filipe Riva, et al. "Allometric escape from acoustic constraints is rare for frog calls." Ecology and Evolution 10.8 (2020): 3686-3695.	No	Haddad, C. F. B., Toledo, L. F., Prado, C. P. A., Loebmann, D., Gasparini, J. L., Sazima, I. 2013. Guia dos Anfíbios da Mata Atlântica - Diversidade e Biologia / Guide to the Amphibians of the Atlantic Forest: Diversity and Biology. Anolis Books Editora, 1st Edition. São Paulo, Brazil. 550p.
Hyloidea	Hylidae	Boana	Boana aguilari	n/a	41.7	21.3	2.2	Lehr, Edgar, Julian Faivovich, and Karl-Heinz Jungfer. "A new andean species of the Hypsiboas pulchellus group: Adults, calls, and phylogenetic relationships." Herpetologica 66.3 (2010): 296-307.	858	Lehr, Edgar, Julian Faivovich, and Karl-Heinz Jungfer. "A new andean species of the Hypsiboas pulchellus group: Adults, calls, and phylogenetic relationships." Herpetologica 66.3 (2010): 296-307.	n/a	n/a
Hyloidea	Hylidae	Boana	Boana aguilari	n/a	41.7	21.3	2.2		n/a	n/a	n/a	n/a
Hyloidea	Hylidae	Boana	Boana albomarginata	ZUEC-AMP 20805	44.52	24.35	2.95		2711	Tonini, João Filipe Riva, et al. "Allometric escape from acoustic constraints is rare for frog calls." Ecology and Evolution 10.8 (2020): 3686-3695.	No	Haddad, C. F. B., Toledo, L. F., Prado, C. P. A., Loebmann, D., Gasparini, J. L., Sazima, I. 2013. Guia dos Anfíbios da Mata Atlântica - Diversidade e Biologia / Guide to the Amphibians of the Atlantic Forest: Diversity and Biology. Anolis Books Editora, 1st Edition. São Paulo, Brazil. 550p.
Hyloidea	Hylidae	Boana	Boana albomarginata	ZUEC-AMP 8226	48.95	28.07	2.63		n/a	n/a	n/a	n/a
Hyloidea	Hylidae	Boana	Boana albomarginata	ZUEC-AMP 20802	46.06	23.42	3.17		n/a	n/a	n/a	n/a
Hyloidea	Hylidae	Boana	Boana albopunctata	ZUEC-AMP 7911	54.33	31.22	3.2		2112.03	Tonini, João Filipe Riva, et al. "Allometric escape from acoustic constraints is rare for frog calls." Ecology and Evolution 10.8 (2020): 3686-3695.	No	Haddad, C. F. B., Toledo, L. F., Prado, C. P. A., Loebmann, D., Gasparini, J. L., Sazima, I. 2013. Guia dos Anfíbios da Mata Atlântica - Diversidade e Biologia / Guide to the Amphibians of the Atlantic Forest: Diversity and Biology. Anolis Books Editora, 1st Edition. São Paulo, Brazil. 550p.
Hyloidea	Hylidae	Boana	Boana albopunctata	ZUEC-AMP 7910	49.48	29.44	3.17		n/a	n/a	n/a	n/a
Hyloidea	Hylidae	Boana	Boana albopunctata	ZUEC-AMP 8131	46.13	28.15	3.33		n/a	n/a	n/a	n/a
Hyloidea	Hylidae	Boana	Boana alfaroi	n/a	32.8	18.5	2.28	Caminer, Marcel A., and Santiago R. Ron. "Systematics of treefrogs of the Hypsiboas calcaratus and Hypsiboas fasciatus species complex (Anura, Hylidae) with the description of four new species." Zookeys 370 (2014): 1.	2079.53	Tonini, João Filipe Riva, et al. "Allometric escape from acoustic constraints is rare for frog calls." Ecology and Evolution 10.8 (2020): 3686-3695.	No	Caminer, Marcel A., and Santiago R. Ron. "Systematics of treefrogs of the Hypsiboas calcaratus and Hypsiboas fasciatus species complex (Anura, Hylidae) with the description of four new species." Zookeys 370 (2014): 1.
Hyloidea	Hylidae	Boana	Boana almendarizae	n/a	37.64	21.27	2.27	Caminer, Marcel A., and Santiago R. Ron. "Systematics of treefrogs of the Hypsiboas calcaratus and Hypsiboas fasciatus species complex (Anura, Hylidae) with the description of four new species." Zookeys 370 (2014): 1.	1954.43	Tonini, João Filipe Riva, et al. "Allometric escape from acoustic constraints is rare for frog calls." Ecology and Evolution 10.8 (2020): 3686-3695.	No	Caminer, Marcel A., and Santiago R. Ron. "Systematics of treefrogs of the Hypsiboas calcaratus and Hypsiboas fasciatus species complex (Anura, Hylidae) with the description of four new species." Zookeys 370 (2014): 1.
Hyloidea	Hylidae	Boana	Boana atlantica	ZUEC-AMP 21745	37.3	17.56	2.09		1580	Tonini, João Filipe Riva, et al. "Allometric escape from acoustic constraints is rare for frog calls." Ecology and Evolution 10.8 (2020): 3686-3695.	No	Haddad, C. F. B., Toledo, L. F., Prado, C. P. A., Loebmann, D., Gasparini, J. L., Sazima, I. 2013. Guia dos Anfíbios da Mata Atlântica - Diversidade e Biologia / Guide to the Amphibians of the Atlantic Forest: Diversity and Biology. Anolis Books Editora, 1st Edition. São Paulo, Brazil. 550p.
Hyloidea	Hylidae	Boana	Boana atlantica	ZUEC-AMP 1798	41.87	19.24	2.37		n/a	n/a	n/a	n/a
Hyloidea	Hylidae	Boana	Boana atlantica	ZUEC-AMP 1799	34.53	17.54	2.1		n/a	n/a	n/a	n/a
Hyloidea	Hylidae	Boana	Boana atlantica	ZUEC-AMP 21746	36.04	17.68	1.85		n/a	n/a	n/a	n/a
Hyloidea	Hylidae	Boana	Boana balzani	n/a	40.4	21.6	2.2	Duellman, William E., Ignacio de la Riva, and Erik R. Wild. "Frogs of the Hyla arntata and Hyla pulchella Groups in the Andes of South America, with Definitions and Analyses of Phylogenetic Relationships of Andean Groups of Hyla." (1997).	1150	Tonini, João Filipe Riva, et al. "Allometric escape from acoustic constraints is rare for frog calls." Ecology and Evolution 10.8 (2020): 3686-3695.	n/a	n/a
Hyloidea	Hylidae	Boana	Boana benitezi	n/a	42	n/a	n/a		1880	Myers, Charles W., and Maureen A. Donnelly. "A tepui herpetofauna on a granitic mountain (Tamacuari) in the borderland between Venezuela and Brazil: report from the Phipps Tapirapecó Expedition. American Museum novitates; no. 3213." (1997).	YES	Myers, Charles W., and Maureen A. Donnelly. "A tepui herpetofauna on a granitic mountain (Tamacuari) in the borderland between Venezuela and Brazil: report from the Phipps Tapirapecó Expedition. American Museum novitates; no. 3213." (1997).
Hyloidea	Hylidae	Boana	Boana bischoffi	ZUEC-AMP 4980	40.91	22.71	1.91		1507	Tonini, João Filipe Riva, et al. "Allometric escape from acoustic constraints is rare for frog calls." Ecology and Evolution 10.8 (2020): 3686-3695.	No	Haddad, C. F. B., Toledo, L. F., Prado, C. P. A., Loebmann, D., Gasparini, J. L., Sazima, I. 2013. Guia dos Anfíbios da Mata Atlântica - Diversidade e Biologia / Guide to the Amphibians of the Atlantic Forest: Diversity and Biology. Anolis Books Editora, 1st Edition. São Paulo, Brazil. 550p.
Hyloidea	Hylidae	Boana	Boana bischoffi	ZUEC-AMP 17622	38.9	20.91	1.74		n/a	n/a	n/a	n/a
Hyloidea	Hylidae	Boana	Boana bischoffi	ZUEC-AMP 17623	41.94	23.32	1.88		n/a	n/a	n/a	n/a
Hyloidea	Hylidae	Boana	Boana boans	ZUEC-AMP 5013	106.79	56.42	5.29		710	Tonini, João Filipe Riva, et al. "Allometric escape from acoustic constraints is rare for frog calls." Ecology and Evolution 10.8 (2020): 3686-3695.	No	Matavelli, Rodrigo, et al. "New records of anurans in the state of Maranhão, Brazil: Hypsiboas boans (Linnaeus, 1758)(Hylidae) and Leptodactylus syphax Bokermann, 1969 (Leptodactylidae)." Check List 9.4 (2013): 899-901.
Hyloidea	Hylidae	Boana	Boana boans	ZUEC-AMP 10907	108.62	62.31	5.86		n/a	n/a	n/a	n/a
Hyloidea	Hylidae	Boana	Boana boans	ZUEC-AMP 15999	103.48	56.07	5.04		n/a	n/a	n/a	n/a
Hyloidea	Hylidae	Boana	Boana botumirim	n/a	29.4	15.8	1.5	Caramaschi, Ulisses, Carlos Alberto G. Cruz, and Luciana B. Nascimento. "A new species of Hypsiboas of the H. polytaenius clade from southeastern Brazil (Anura: Hylidae)." South American Journal of Herpetology 4.3 (2009): 210-217.	3739.7	Tonini, João Filipe Riva, et al. "Allometric escape from acoustic constraints is rare for frog calls." Ecology and Evolution 10.8 (2020): 3686-3695.	No	Caramaschi, Ulisses, Carlos Alberto G. Cruz, and Luciana B. Nascimento. "A new species of Hypsiboas of the H. polytaenius clade from southeastern Brazil (Anura: Hylidae)." South American Journal of Herpetology 4.3 (2009): 210-217.
Hyloidea	Hylidae	Boana	Boana caiapo	n/a	47.6	23.8	2.3	Pinheiro, Paulo DP, et al. "A new species of the Boana albopunctata Group (Anura: Hylidae) from the Cerrado of Brazil." South american journal of herpetology 13.2 (2018): 170-183.	1875	Pinheiro, Paulo DP, et al. "A new species of the Boana albopunctata Group (Anura: Hylidae) from the Cerrado of Brazil." South american journal of herpetology 13.2 (2018): 170-183.	No	Pinheiro, Paulo DP, et al. "A new species of the Boana albopunctata Group (Anura: Hylidae) from the Cerrado of Brazil." South american journal of herpetology 13.2 (2018): 170-183.
Hyloidea	Hylidae	Boana	Boana caingua	ZUEC-AMP 1138	34.55	18.56	1.31		3425.1	Batista, Vinicius Guerra, et al. "Vocalizations of two species of the Hypsiboas pulchellus group (Anura: Hylidae) with comments on this species group." North-Western Journal of Zoology 11.2 (2015).	No	Haddad, C. F. B., Toledo, L. F., Prado, C. P. A., Loebmann, D., Gasparini, J. L., Sazima, I. 2013. Guia dos Anfíbios da Mata Atlântica - Diversidade e Biologia / Guide to the Amphibians of the Atlantic Forest: Diversity and Biology. Anolis Books Editora, 1st Edition. São Paulo, Brazil. 550p.
Hyloidea	Hylidae	Boana	Boana caingua	ZUEC-AMP 8529	32.64	18.66	1.37		n/a	n/a	n/a	n/a
Hyloidea	Hylidae	Boana	Boana caingua	ZUEC-AMP 10570	34.17	17.26	1.45		n/a	n/a	n/a	n/a
Hyloidea	Hylidae	Boana	Boana caipora	n/a	33	18.1	1.5	Antunes, André Pinassi, Julian Faivovich, and Célio FB Haddad. "A new species of Hypsiboas from the Atlantic forest of Southeastern Brazil (Amphibia: Anura: Hylidae)." Copeia2008.1 (2008): 179-190.	2670	Tonini, João Filipe Riva, et al. "Allometric escape from acoustic constraints is rare for frog calls." Ecology and Evolution 10.8 (2020): 3686-3695.	YES	Haddad, C. F. B., Toledo, L. F., Prado, C. P. A., Loebmann, D., Gasparini, J. L., Sazima, I. 2013. Guia dos Anfíbios da Mata Atlântica - Diversidade e Biologia / Guide to the Amphibians of the Atlantic Forest: Diversity and Biology. Anolis Books Editora, 1st Edition. São Paulo, Brazil. 550p.
Hyloidea	Hylidae	Boana	Boana calcarata	ZUEC-AMP 16069	54.88	28.7	3.22		1780.5	Tonini, João Filipe Riva, et al. "Allometric escape from acoustic constraints is rare for frog calls." Ecology and Evolution 10.8 (2020): 3686-3695.	No	Caminer, Marcel A., and Santiago R. Ron. "Systematics of treefrogs of the Hypsiboas calcaratus and Hypsiboas fasciatus species complex (Anura, Hylidae) with the description of four new species." Zookeys 370 (2014): 1.
Hyloidea	Hylidae	Boana	Boana calcarata	ZUEC-AMP 7345	42.81	27.29	2.54		n/a	n/a	n/a	n/a
Hyloidea	Hylidae	Boana	Boana calcarata	ZUEC-AMP 15003	53.34	26.6	3.06		n/a	n/a	n/a	n/a
Hyloidea	Hylidae	Boana	Boana cambui	n/a	32.8	16.7	1.6	Pinheiro, Paulo DP, et al. "A new species of the Hypsiboas pulchellus group from the Serra da Mantiqueira, Southeastern Brazil (Amphibia: Anura: Hylidae)." Herpetologica 72.3 (2016): 256-270.	4125	Pinheiro, Paulo DP, et al. "A new species of the Hypsiboas pulchellus group from the Serra da Mantiqueira, Southeastern Brazil (Amphibia: Anura: Hylidae)." Herpetologica 72.3 (2016): 256-270.	No	Pinheiro, Paulo DP, et al. "A new species of the Hypsiboas pulchellus group from the Serra da Mantiqueira, Southeastern Brazil (Amphibia: Anura: Hylidae)." Herpetologica 72.3 (2016): 256-270.
Hyloidea	Hylidae	Boana	Boana cinerascens	ZUEC-AMP 11214	39.19	20.17	2.1		1420	Tonini, João Filipe Riva, et al. "Allometric escape from acoustic constraints is rare for frog calls." Ecology and Evolution 10.8 (2020): 3686-3695.	No	Telles, David Otávio Carmo, Sergio André Ferreira Vaz, and Marcelo Menin. "Reproductive biology, size and diet of Hypsiboas cinerascens (Anura: Hylidae) in two urban forest fragments in Central Amazonia, Brazil." Phyllomedusa: Journal of Herpetology 12.1 (2013): 69-76.
Hyloidea	Hylidae	Boana	Boana cinerascens	ZUEC-AMP 4620	35.51	18.75	2.11		n/a	n/a	n/a	n/a
Hyloidea	Hylidae	Boana	Boana cinerascens	ZUEC-AMP 4640	34.2	17.41	1.96		n/a	n/a	n/a	n/a
Hyloidea	Hylidae	Boana	Boana cipoensis	ZUEC-AMP 1079	31.66	16.81	1.22		n/a	n/a	n/a	n/a
Hyloidea	Hylidae	Boana	Boana cipoensis	ZUEC-AMP 1895	31.8	17.43	1.17		n/a	n/a	n/a	n/a
Hyloidea	Hylidae	Boana	Boana cipoensis	ZUEC-AMP 2318	32	15.74	1.25		n/a	n/a	n/a	n/a
Hyloidea	Hylidae	Boana	Boana clepsydra	ZUEC-AMP 15937	39.85	21.13	1.36		n/a	n/a	n/a	n/a
Hyloidea	Hylidae	Boana	Boana crepitans	ZUEC-AMP 11333	63.09	35.17	3.83		350	Tonini, João Filipe Riva, et al. "Allometric escape from acoustic constraints is rare for frog calls." Ecology and Evolution 10.8 (2020): 3686-3695.	No	Haddad, C. F. B., Toledo, L. F., Prado, C. P. A., Loebmann, D., Gasparini, J. L., Sazima, I. 2013. Guia dos Anfíbios da Mata Atlântica - Diversidade e Biologia / Guide to the Amphibians of the Atlantic Forest: Diversity and Biology. Anolis Books Editora, 1st Edition. São Paulo, Brazil. 550p.
Hyloidea	Hylidae	Boana	Boana crepitans	ZUEC-AMP 9376	66.34	33.95	4.41		n/a	n/a	n/a	n/a
Hyloidea	Hylidae	Boana	Boana crepitans	ZUEC-AMP 14400	60.52	34.46	3.48		n/a	n/a	n/a	n/a
Hyloidea	Hylidae	Boana	Boana curupi	n/a	39.8	20.4	1.9	Garcia, Paulo CA, Juliá N. Faivovich, and Célio FB Haddad. "Redescription of Hypsiboas semiguttatus, with the description of a new species of the Hypsiboas pulchellus group." Copeia2007.4 (2007): 933-949.	1700	Tonini, João Filipe Riva, et al. "Allometric escape from acoustic constraints is rare for frog calls." Ecology and Evolution 10.8 (2020): 3686-3695.	YES	Haddad, C. F. B., Toledo, L. F., Prado, C. P. A., Loebmann, D., Gasparini, J. L., Sazima, I. 2013. Guia dos Anfíbios da Mata Atlântica - Diversidade e Biologia / Guide to the Amphibians of the Atlantic Forest: Diversity and Biology. Anolis Books Editora, 1st Edition. São Paulo, Brazil. 550p.
Hyloidea	Hylidae	Boana	Boana diabolica	n/a	43.5	23.5	3.55	Fouquet, Antoine, et al. "Cryptic diversity in the Hypsiboas semilineatus species group (Amphibia, Anura) with the description of a new species from the eastern Guiana Shield." Zootaxa 4084.1 (2016): 79-104.	1159	Fouquet, Antoine, et al. "Cryptic diversity in the Hypsiboas semilineatus species group (Amphibia, Anura) with the description of a new species from the eastern Guiana Shield." Zootaxa 4084.1 (2016): 79-104.	No	Fouquet, Antoine, et al. "Cryptic diversity in the Hypsiboas semilineatus species group (Amphibia, Anura) with the description of a new species from the eastern Guiana Shield." Zootaxa 4084.1 (2016): 79-104.
Hyloidea	Hylidae	Boana	Boana ericae	ZUEC-AMP 24666	31.7	17.51	0.93		2700	Tonini, João Filipe Riva, et al. "Allometric escape from acoustic constraints is rare for frog calls." Ecology and Evolution 10.8 (2020): 3686-3695.	YES	Garcia, Paulo CA, and Célio FB Haddad. "Vocalizations and comments on the relationships of Hypsiboas ericae (Amphibia, Hylidae)." Iheringia. Série Zoologia 98.1 (2008): 161-166.
Hyloidea	Hylidae	Boana	Boana ericae	ZUEC-AMP 24667	31.77	18.35	1.26		n/a	n/a	n/a	n/a
Hyloidea	Hylidae	Boana	Boana faber	ZUEC-AMP 20149	105.15	61.22	7.01		360	Tonini, João Filipe Riva, et al. "Allometric escape from acoustic constraints is rare for frog calls." Ecology and Evolution 10.8 (2020): 3686-3695.	No	Haddad, C. F. B., Toledo, L. F., Prado, C. P. A., Loebmann, D., Gasparini, J. L., Sazima, I. 2013. Guia dos Anfíbios da Mata Atlântica - Diversidade e Biologia / Guide to the Amphibians of the Atlantic Forest: Diversity and Biology. Anolis Books Editora, 1st Edition. São Paulo, Brazil. 550p.
Hyloidea	Hylidae	Boana	Boana faber	ZUEC-AMP 20148	99.3	58.7	7.21		n/a	n/a	n/a	n/a
Hyloidea	Hylidae	Boana	Boana faber	ZUEC-AMP 20150	105.69	56.11	6.91		n/a	n/a	n/a	n/a
Hyloidea	Hylidae	Boana	Boana fasciata	ZUEC-AMP 5682	43.68	24.39	1.89		1750	Tonini, João Filipe Riva, et al. "Allometric escape from acoustic constraints is rare for frog calls." Ecology and Evolution 10.8 (2020): 3686-3695.	No	Caminer, Marcel A., and Santiago R. Ron. "Systematics of treefrogs of the Hypsiboas calcaratus and Hypsiboas fasciatus species complex (Anura, Hylidae) with the description of four new species." Zookeys 370 (2014): 1.
Hyloidea	Hylidae	Boana	Boana fasciata	ZUEC-AMP 5696	33.96	20.66	1.82		n/a	n/a	n/a	n/a
Hyloidea	Hylidae	Boana	Boana fasciata	ZUEC-AMP 5702	34.82	19.65	1.94		n/a	n/a	n/a	n/a
Hyloidea	Hylidae	Boana	Boana fasciata	n/a	35.4	20.7	2.42	Caminer, Marcel A., and Santiago R. Ron. "Systematics of treefrogs of the Hypsiboas calcaratus and Hypsiboas fasciatus species complex (Anura, Hylidae) with the description of four new species." Zookeys 370 (2014): 1.	n/a	n/a	n/a	n/a
Hyloidea	Hylidae	Boana	Boana freicanecae	n/a	39.2	22.5	2.2	Carnaval, Ana Carolina OQ, and Oswaldo L. Peixoto. "A new species of Hyla from northeastern Brazil (Amphibia, Anura, Hylidae)." Herpetologica 60.3 (2004): 387-395.	n/a	n/a	YES	Haddad, C. F. B., Toledo, L. F., Prado, C. P. A., Loebmann, D., Gasparini, J. L., Sazima, I. 2013. Guia dos Anfíbios da Mata Atlântica - Diversidade e Biologia / Guide to the Amphibians of the Atlantic Forest: Diversity and Biology. Anolis Books Editora, 1st Edition. São Paulo, Brazil. 550p.
Hyloidea	Hylidae	Boana	Boana geographica	ZUEC-AMP 5461	45.03	21.52	2.75		720	Tonini, João Filipe Riva, et al. "Allometric escape from acoustic constraints is rare for frog calls." Ecology and Evolution 10.8 (2020): 3686-3695.	No	Angulo, Ariadne, Andrés R. Acosta, and José Vicente Rueda-Almonacid. "Diversity and frequency of visual defensive behaviours in a population of Hypsiboas geographicus." The Herpetological Journal 17.2 (2007): 138-140.
Hyloidea	Hylidae	Boana	Boana geographica	ZUEC-AMP 5900	47	24.63	3.64		n/a	n/a	n/a	n/a
Hyloidea	Hylidae	Boana	Boana geographica	ZUEC-AMP 7917	44.59	21.84	3.13		n/a	n/a	n/a	n/a
Hyloidea	Hylidae	Boana	Boana gladiator	n/a	43.4	23.8	2.1	KÖHLER, Jörn et al. Systematics of Andean gladiator frogs of the Hypsiboas pulchellus species group (Anura, Hylidae). Zoologica scripta, v. 39, n. 6, p. 572-590, 2010.	880	Köhler, Jörn, et al. "Systematics of Andean gladiator frogs of the Hypsiboas pulchellus species group (Anura, Hylidae)." Zoologica Scripta 39.6 (2010): 572-590.	No	Köhler, Jörn, et al. "Systematics of Andean gladiator frogs of the Hypsiboas pulchellus species group (Anura, Hylidae)." Zoologica Scripta 39.6 (2010): 572-590.
Hyloidea	Hylidae	Boana	Boana guentheri	ZUEC-AMP 11732	37.15	18.2	1.78		n/a	n/a	No	Haddad, C. F. B., Toledo, L. F., Prado, C. P. A., Loebmann, D., Gasparini, J. L., Sazima, I. 2013. Guia dos Anfíbios da Mata Atlântica - Diversidade e Biologia / Guide to the Amphibians of the Atlantic Forest: Diversity and Biology. Anolis Books Editora, 1st Edition. São Paulo, Brazil. 550p.
Hyloidea	Hylidae	Boana	Boana guentheri	ZUEC-AMP 11736	33.68	17.54	1.24		n/a	n/a	n/a	n/a
Hyloidea	Hylidae	Boana	Boana guentheri	ZUEC-AMP 21812	37.63	19.3	1.71		n/a	n/a	n/a	n/a
Hyloidea	Hylidae	Boana	Boana hutchinsi	n/a	43	21.8	3.4	Pyburn, William F., and David H. Hall. "A new stream-inhabiting treefrog (Anura: Hylidae) from southeastern Colombia." Herpetologica (1984): 366-372.	n/a	n/a	n/a	n/a
Hyloidea	Hylidae	Boana	Boana jaguariaivensis	n/a	26.9	13.5	1.2	CARAMASCHI, Ulisses; CRUZ, Carlos Alberto G.; SEGALLA, Magno V. A new species of Hypsiboas of the H. polytaenius clade from the state of Paraná, southern Brazil (Anura: Hylidae). South American Journal of Herpetology, v. 5, n. 3, p. 169-175, 2010.	4675	Batista, Vinicius, and Rogério Bastos. "Anurans from a Cerrado-Atlantic Forest ecotone in Campos Gerais region, southern Brazil." Check List 10 (2014): 574.	No	Batista, Vinicius, and Rogério Bastos. "Anurans from a Cerrado-Atlantic Forest ecotone in Campos Gerais region, southern Brazil." Check List 10 (2014): 574.
Hyloidea	Hylidae	Boana	Boana jimenezi	n/a	31.6	16.6	1.4	Señaris, J. Celsa, and José Ayarzagüena. "A new species of Hypsiboas (Amphibia; Anura; Hylidae) from the Venezuelan Guayana, with notes on Hypsiboas sibleszi (Rivero 1972)." Herpetologica 62.3 (2006): 308-319.	3198	Señaris, J. Celsa, and José Ayarzagüena. "A new species of Hypsiboas (Amphibia; Anura; Hylidae) from the Venezuelan Guayana, with notes on Hypsiboas sibleszi (Rivero 1972)." Herpetologica 62.3 (2006): 308-319.	No	Señaris, J. Celsa, and José Ayarzagüena. "A new species of Hypsiboas (Amphibia; Anura; Hylidae) from the Venezuelan Guayana, with notes on Hypsiboas sibleszi (Rivero 1972)." Herpetologica 62.3 (2006): 308-319.
Hyloidea	Hylidae	Boana	Boana lanciformis	ZUEC-AMP 4426	61.26	41.09	4.08		1654.3	Tonini, João Filipe Riva, et al. "Allometric escape from acoustic constraints is rare for frog calls." Ecology and Evolution 10.8 (2020): 3686-3695.	No	Tovar-Rodríguez, W. T., Andrés Chacón-Ortiz, and Rosa De Jesús Durán. "Abundancia, disposición espacial e historia natural de Hypsiboas lanciformis (Anura: Hylidae) al suroeste de los Andes Venezuelanos." Rev Acad Colomb Cienc 127 (2009): 193-200.
Hyloidea	Hylidae	Boana	Boana lanciformis	ZUEC-AMP 4613	62.5	39.43	3.78		n/a	n/a	n/a	n/a
Hyloidea	Hylidae	Boana	Boana lanciformis	ZUEC-AMP 4622	63.06	40.01	3.73		n/a	n/a	n/a	n/a
Hyloidea	Hylidae	Boana	Boana lundii	ZUEC-AMP 2691	76.81	40.93	4.29		1500	Tonini, João Filipe Riva, et al. "Allometric escape from acoustic constraints is rare for frog calls." Ecology and Evolution 10.8 (2020): 3686-3695.	YES	Haddad, C. F. B., Toledo, L. F., Prado, C. P. A., Loebmann, D., Gasparini, J. L., Sazima, I. 2013. Guia dos Anfíbios da Mata Atlântica - Diversidade e Biologia / Guide to the Amphibians of the Atlantic Forest: Diversity and Biology. Anolis Books Editora, 1st Edition. São Paulo, Brazil. 550p.
Hyloidea	Hylidae	Boana	Boana lundii	ZUEC-AMP 2771	65.47	35.63	3.61		n/a	n/a	n/a	n/a
Hyloidea	Hylidae	Boana	Boana lundii	ZUEC-AMP 10909	65.34	36.62	4.23		n/a	n/a	n/a	n/a
Hyloidea	Hylidae	Boana	Boana maculateralis	n/a	36	20.67	2.17	Caminer, Marcel A., and Santiago R. Ron. "Systematics of treefrogs of the Hypsiboas calcaratus and Hypsiboas fasciatus species complex (Anura, Hylidae) with the description of four new species." Zookeys 370 (2014): 1.	2217.93	Tonini, João Filipe Riva, et al. "Allometric escape from acoustic constraints is rare for frog calls." Ecology and Evolution 10.8 (2020): 3686-3695.	No	Caminer, Marcel A., and Santiago R. Ron. "Systematics of treefrogs of the Hypsiboas calcaratus and Hypsiboas fasciatus species complex (Anura, Hylidae) with the description of four new species." Zookeys 370 (2014): 1.
Hyloidea	Hylidae	Boana	Boana marianitae	n/a	56.2	n/a	2.75	Carrizo, Gustavo R. "Cuatro especies nuevas de anuros (Bufonidae: bufo e Hilydae: hyla) del norte de la Argentina." Cuadernos de Herpetología 7 (1992).	885	Tonini, João Filipe Riva, et al. "Allometric escape from acoustic constraints is rare for frog calls." Ecology and Evolution 10.8 (2020): 3686-3695.	n/a	n/a
Hyloidea	Hylidae	Boana	Boana melanopleura	n/a	43.6	21.6	2.4	Duellman, William E., Ignacio de la Riva, and Erik R. Wild. "Frogs of the Hyla arntata and Hyla pulchella Groups in the Andes of South America, with Definitions and Analyses of Phylogenetic Relationships of Andean Groups of Hyla." (1997).	n/a	n/a	n/a	n/a
Hyloidea	Hylidae	Boana	Boana multifasciata	n/a	49	29.1	3.5	Carvalho, T. R., Ariovaldo Antonio Giaretta, and Katia Gomes Facure. "A new species of Hypsiboas Wagler (Anura: Hylidae) closely related to H. multifasciatus Günther from southeastern Brazil." Zootaxa 2521.1 (2010): 37-52.	2800	Tonini, João Filipe Riva, et al. "Allometric escape from acoustic constraints is rare for frog calls." Ecology and Evolution 10.8 (2020): 3686-3695.	n/a	n/a
Hyloidea	Hylidae	Boana	Boana nympha	n/a	29.8	15.3	1.5	Faivovich, Julián, et al. "A new species of the Hypsiboas benitezi group from the western Amazon basin (Amphibia: Anura: Hylidae)." Herpetologica 62.1 (2006): 96-108.	n/a	n/a	n/a	n/a
Hyloidea	Hylidae	Boana	Boana palaestes	n/a	39.5	21.9	2.4	Duellman, William E., Ignacio de la Riva, and Erik R. Wild. "Frogs of the Hyla arntata and Hyla pulchella Groups in the Andes of South America, with Definitions and Analyses of Phylogenetic Relationships of Andean Groups of Hyla." (1997).	4444	Tonini, João Filipe Riva, et al. "Allometric escape from acoustic constraints is rare for frog calls." Ecology and Evolution 10.8 (2020): 3686-3695.	n/a	n/a
Hyloidea	Hylidae	Boana	Boana paranaiba	n/a	49.6	29.8	4.3	Carvalho, T. R., Ariovaldo Antonio Giaretta, and Katia Gomes Facure. "A new species of Hypsiboas Wagler (Anura: Hylidae) closely related to H. multifasciatus Günther from southeastern Brazil." Zootaxa 2521.1 (2010): 37-52.	2630	Tonini, João Filipe Riva, et al. "Allometric escape from acoustic constraints is rare for frog calls." Ecology and Evolution 10.8 (2020): 3686-3695.	YES	Carvalho, T. R., Ariovaldo Antonio Giaretta, and Katia Gomes Facure. "A new species of Hypsiboas Wagler (Anura: Hylidae) closely related to H. multifasciatus Günther from southeastern Brazil." Zootaxa 2521.1 (2010): 37-52.
Hyloidea	Hylidae	Boana	Boana pardalis	ZUEC-AMP 6050	64.57	35.75	3.88		590	Tonini, João Filipe Riva, et al. "Allometric escape from acoustic constraints is rare for frog calls." Ecology and Evolution 10.8 (2020): 3686-3695.	No	Haddad, C. F. B., Toledo, L. F., Prado, C. P. A., Loebmann, D., Gasparini, J. L., Sazima, I. 2013. Guia dos Anfíbios da Mata Atlântica - Diversidade e Biologia / Guide to the Amphibians of the Atlantic Forest: Diversity and Biology. Anolis Books Editora, 1st Edition. São Paulo, Brazil. 550p.
Hyloidea	Hylidae	Boana	Boana pardalis	ZUEC-AMP 3624	63	34.23	4.28		n/a	n/a	n/a	n/a
Hyloidea	Hylidae	Boana	Boana pardalis	ZUEC-AMP 6048	64.47	33.91	4.09		n/a	n/a	n/a	n/a
Hyloidea	Hylidae	Boana	Boana picturata	ZUEC-AMP 21696	63.47	40.57	2.14		n/a	n/a	n/a	n/a
Hyloidea	Hylidae	Boana	Boana poaju	n/a	42.7	22.6	2	Garcia, Paulo CA, O. L. Peixoto, and Célio FB Haddad. "A new species of Hypsiboas (Anura: Hylidae) from the Atlantic Forest of Santa Catarina, Southern Brazil, with comments on its conservation status." South American Journal of Herpetology3.1 (2008): 27-36.	n/a	n/a	YES	Haddad, C. F. B., Toledo, L. F., Prado, C. P. A., Loebmann, D., Gasparini, J. L., Sazima, I. 2013. Guia dos Anfíbios da Mata Atlântica - Diversidade e Biologia / Guide to the Amphibians of the Atlantic Forest: Diversity and Biology. Anolis Books Editora, 1st Edition. São Paulo, Brazil. 550p.
Hyloidea	Hylidae	Boana	Boana polytaenia	ZUEC-AMP 18364	31.83	16.41	1.1		5368	Tonini, João Filipe Riva, et al. "Allometric escape from acoustic constraints is rare for frog calls." Ecology and Evolution 10.8 (2020): 3686-3695.	No	Haddad, C. F. B., Toledo, L. F., Prado, C. P. A., Loebmann, D., Gasparini, J. L., Sazima, I. 2013. Guia dos Anfíbios da Mata Atlântica - Diversidade e Biologia / Guide to the Amphibians of the Atlantic Forest: Diversity and Biology. Anolis Books Editora, 1st Edition. São Paulo, Brazil. 550p.
Hyloidea	Hylidae	Boana	Boana polytaenia	ZUEC-AMP 22892	31.45	16.19	1.51		5459.5	Pinheiro, Paulo Durães Pereira, Tiago Leite Pezzuti, and Paulo Christiano de Anchietta Garcia. "The Tadpole and vocalizaTions of Hypsiboas polytaenius (cope, 1870)(anura, hylidae, hylinae)." south american Journal of Herpetology 7.2 (2012): 123-133.	n/a	n/a
Hyloidea	Hylidae	Boana	Boana polytaenia	ZUEC-AMP 8215	27.29	13.87	1.27		7100	Tonini, João Filipe Riva, et al. "Allometric escape from acoustic constraints is rare for frog calls." Ecology and Evolution 10.8 (2020): 3686-3695.	No	Acioli, Ellen, and Luís Toledo. "Amphibia, Anura, Hylidae, Hypsiboas beckeri: filling gap and description of its advertisement call." Check List 4 (2008): 182.
Hyloidea	Hylidae	Boana	Boana polytaenia	ZUEC-AMP 6259	27.42	14.43	1.3		n/a	n/a	n/a	n/a
Hyloidea	Hylidae	Boana	Boana polytaenia	ZUEC-AMP 9891	33.42	17.07	1.63		n/a	n/a	YES	Haddad, C. F. B., Toledo, L. F., Prado, C. P. A., Loebmann, D., Gasparini, J. L., Sazima, I. 2013. Guia dos Anfíbios da Mata Atlântica - Diversidade e Biologia / Guide to the Amphibians of the Atlantic Forest: Diversity and Biology. Anolis Books Editora, 1st Edition. São Paulo, Brazil. 550p.
Hyloidea	Hylidae	Boana	Boana polytaenia	ZUEC-AMP 9892	30	15.44	1.46		n/a	n/a	n/a	n/a
Hyloidea	Hylidae	Boana	Boana polytaenia	ZUEC-AMP 9893	33.48	16.31	1.58		n/a	n/a	n/a	n/a
Hyloidea	Hylidae	Boana	Boana polytaenia	ZUEC-AMP 11536	27.57	14.08	1.31		n/a	n/a	n/a	n/a
Hyloidea	Hylidae	Boana	Boana polytaenia	ZUEC-AMP 16345	31.57	17.46	1.37		n/a	n/a	n/a	n/a
Hyloidea	Hylidae	Boana	Boana polytaenia	ZUEC-AMP 18229	30.14	15.05	1.54		n/a	n/a	n/a	n/a
Hyloidea	Hylidae	Boana	Boana polytaenia	ZUEC-AMP 22816	26.19	14.91	1.36		n/a	n/a	n/a	n/a
Hyloidea	Hylidae	Boana	Boana polytaenia	ZUEC-AMP 22900	29.11	15.39	1.25		n/a	n/a	n/a	n/a
Hyloidea	Hylidae	Boana	Boana polytaenia	ZUEC-AMP 23035	30.35	15.43	1.38		n/a	n/a	n/a	n/a
Hyloidea	Hylidae	Boana	Boana polytaenia	ZUEC-AMP 23112	28.93	15.58	1.2		n/a	n/a	n/a	n/a
Hyloidea	Hylidae	Boana	Boana prasina	ZUEC-AMP 11518	45.38	20.98	2.64		1556	Tonini, João Filipe Riva, et al. "Allometric escape from acoustic constraints is rare for frog calls." Ecology and Evolution 10.8 (2020): 3686-3695.	No	Haddad, C. F. B., Toledo, L. F., Prado, C. P. A., Loebmann, D., Gasparini, J. L., Sazima, I. 2013. Guia dos Anfíbios da Mata Atlântica - Diversidade e Biologia / Guide to the Amphibians of the Atlantic Forest: Diversity and Biology. Anolis Books Editora, 1st Edition. São Paulo, Brazil. 550p.
Hyloidea	Hylidae	Boana	Boana prasina	ZUEC-AMP 4865	49.37	26.08	2.23		n/a	n/a	n/a	n/a
Hyloidea	Hylidae	Boana	Boana prasina	ZUEC-AMP 7973	42.52	23.18	1.98		n/a	n/a	n/a	n/a
Hyloidea	Hylidae	Boana	Boana pulchella	ZUEC-AMP 3443	40.4	22.95	2.18		2300	Tonini, João Filipe Riva, et al. "Allometric escape from acoustic constraints is rare for frog calls." Ecology and Evolution 10.8 (2020): 3686-3695.	No	Haddad, C. F. B., Toledo, L. F., Prado, C. P. A., Loebmann, D., Gasparini, J. L., Sazima, I. 2013. Guia dos Anfíbios da Mata Atlântica - Diversidade e Biologia / Guide to the Amphibians of the Atlantic Forest: Diversity and Biology. Anolis Books Editora, 1st Edition. São Paulo, Brazil. 550p.
Hyloidea	Hylidae	Boana	Boana pulchella	ZUEC-AMP 5303	40.9	23.2	1.82		n/a	n/a	n/a	n/a
Hyloidea	Hylidae	Boana	Boana pulchella	ZUEC-AMP 5306	42.03	22.51	1.94		n/a	n/a	n/a	n/a
Hyloidea	Hylidae	Boana	Boana pulchella	ZUEC-AMP 10426	44.06	23.35	2.03		n/a	n/a	n/a	n/a
Hyloidea	Hylidae	Boana	Boana punctata	ZUEC-AMP 14872	40.27	19.44	1.52		920	Tonini, João Filipe Riva, et al. "Allometric escape from acoustic constraints is rare for frog calls." Ecology and Evolution 10.8 (2020): 3686-3695.	No	Haddad, C. F. B., Toledo, L. F., Prado, C. P. A., Loebmann, D., Gasparini, J. L., Sazima, I. 2013. Guia dos Anfíbios da Mata Atlântica - Diversidade e Biologia / Guide to the Amphibians of the Atlantic Forest: Diversity and Biology. Anolis Books Editora, 1st Edition. São Paulo, Brazil. 550p.
Hyloidea	Hylidae	Boana	Boana punctata	ZUEC-AMP 4687	32.57	17.05	2.07		n/a	n/a	n/a	n/a
Hyloidea	Hylidae	Boana	Boana punctata	ZUEC-AMP 14873	35.38	18.15	1.68		n/a	n/a	n/a	n/a
Hyloidea	Hylidae	Boana	Boana raniceps	ZUEC-AMP 14610	71.34	42.02	4.42		880	Tonini, João Filipe Riva, et al. "Allometric escape from acoustic constraints is rare for frog calls." Ecology and Evolution 10.8 (2020): 3686-3695.	No	Haddad, C. F. B., Toledo, L. F., Prado, C. P. A., Loebmann, D., Gasparini, J. L., Sazima, I. 2013. Guia dos Anfíbios da Mata Atlântica - Diversidade e Biologia / Guide to the Amphibians of the Atlantic Forest: Diversity and Biology. Anolis Books Editora, 1st Edition. São Paulo, Brazil. 550p.
Hyloidea	Hylidae	Boana	Boana raniceps	ZUEC-AMP 6120	69.31	42.14	4.32		n/a	n/a	n/a	n/a
Hyloidea	Hylidae	Boana	Boana raniceps	ZUEC-AMP 8758	66.49	42.75	4.34		n/a	n/a	n/a	n/a
Hyloidea	Hylidae	Boana	Boana rhythmica	n/a	32.9	17.3	1.4	SEÑARIS, J. Celsa; AYARZAGÜENA, José. A new species of Hyla (Anura: Hylidae) from the highlands of Venezuelan Guayana. Journal of Herpetology, p. 634-640, 2002.	3367.4	Tonini, João Filipe Riva, et al. "Allometric escape from acoustic constraints is rare for frog calls." Ecology and Evolution 10.8 (2020): 3686-3695.	YES	SEÑARIS, J. Celsa; AYARZAGÜENA, José. A new species of Hyla (Anura: Hylidae) from the highlands of Venezuelan Guayana. Journal of Herpetology, p. 634-640, 2002.
Hyloidea	Hylidae	Boana	Boana riojana	n/a	52.9	n/a	2.45	Carrizo, Gustavo R. "Cuatro especies nuevas de anuros (Bufonidae: bufo e Hilydae: hyla) del norte de la Argentina." Cuadernos de Herpetología 7 (1992).	2000	Duellman, W. E., I. de la Riva, and E. R. Wild. 1997. Frogs of the Hyla armata and Hyla pulchella groups in the Andes of South America, with definitions and analyses of phylogenetic relationships of Andean groups of Hyla. Sci. Pap. Nat. Hist. Mus. Univ. Kansas (3):1–41.	YES
Hyloidea	Hylidae	Boana	Boana riojana	n/a	50.5	26.9	3	Duellman, William E., Ignacio de la Riva, and Erik R. Wild. "Frogs of the Hyla arntata and Hyla pulchella Groups in the Andes of South America, with Definitions and Analyses of Phylogenetic Relationships of Andean Groups of Hyla." (1997).	n/a	n/a	n/a	n/a
Hyloidea	Hylidae	Boana	Boana riojana	n/a	52.9	n/a	2.45	Carrizo, Gustavo R. "Cuatro especies nuevas de anuros (Bufonidae: bufo e Hilydae: hyla) del norte de la Argentina." Cuadernos de Herpetología 7 (1992).	n/a	n/a	YES
Hyloidea	Hylidae	Boana	Boana secedens	ZUEC-AMP 4107	48.59	26.14	3.09		n/a	n/a	n/a	n/a
Hyloidea	Hylidae	Boana	Boana secedens	ZUEC-AMP 5921	47.33	24.13	3.28		n/a	n/a	No	Vrcibradic, Davor, et al. "Observations on the natural history and body size of the poorly known Brazilian treefrog Hypsiboas secedens (Hylidae: Hylinae: Cophomantini)." (2016): 204-206.
Hyloidea	Hylidae	Boana	Boana secedens	ZUEC-AMP 6396	43.46	22.08	3.14		n/a	n/a	n/a	n/a
Hyloidea	Hylidae	Boana	Boana semiguttata	ZUEC-AMP 9476	39.21	22.93	1.91		2400	Tonini, João Filipe Riva, et al. "Allometric escape from acoustic constraints is rare for frog calls." Ecology and Evolution 10.8 (2020): 3686-3695.	YES	Haddad, C. F. B., Toledo, L. F., Prado, C. P. A., Loebmann, D., Gasparini, J. L., Sazima, I. 2013. Guia dos Anfíbios da Mata Atlântica - Diversidade e Biologia / Guide to the Amphibians of the Atlantic Forest: Diversity and Biology. Anolis Books Editora, 1st Edition. São Paulo, Brazil. 550p.
Hyloidea	Hylidae	Boana	Boana semilineata	ZUEC-AMP 9775	45.43	23.26	3.39		1013.6	Tonini, João Filipe Riva, et al. "Allometric escape from acoustic constraints is rare for frog calls." Ecology and Evolution 10.8 (2020): 3686-3695.	No	Haddad, C. F. B., Toledo, L. F., Prado, C. P. A., Loebmann, D., Gasparini, J. L., Sazima, I. 2013. Guia dos Anfíbios da Mata Atlântica - Diversidade e Biologia / Guide to the Amphibians of the Atlantic Forest: Diversity and Biology. Anolis Books Editora, 1st Edition. São Paulo, Brazil. 550p.
Hyloidea	Hylidae	Boana	Boana semilineata	ZUEC-AMP 11373	42.72	22.03	3.11		n/a	n/a	n/a	n/a
Hyloidea	Hylidae	Boana	Boana semilineata	ZUEC-AMP 23809	55.19	29.1	3.25		n/a	n/a	n/a	n/a
Hyloidea	Hylidae	Boana	Boana stellae	n/a	47.3	24.7	2.4	KWET, Axel. New species of Hypsiboas (Anura: Hylidae) in the pulchellus group from southern Brazil. Salamandra, v. 44, n. 1, p. 1-14, 2008.	1660	KWET, Axel. New species of Hypsiboas (Anura: Hylidae) in the pulchellus group from southern Brazil. Salamandra, v. 44, n. 1, p. 1-14, 2008.	YES	Haddad, C. F. B., Toledo, L. F., Prado, C. P. A., Loebmann, D., Gasparini, J. L., Sazima, I. 2013. Guia dos Anfíbios da Mata Atlântica - Diversidade e Biologia / Guide to the Amphibians of the Atlantic Forest: Diversity and Biology. Anolis Books Editora, 1st Edition. São Paulo, Brazil. 550p.
Hyloidea	Hylidae	Boana	Boana stenocephala	ZUEC-AMP 10853	27.04	13.76	0.88		3874	Martins, Lucas B., et al. "Vocalizações de Hypsiboas beckeri e H. stenocephalus (Anura: Hylidae), duas espécies do grupo de H. polytaenius do sudeste do Brasil." Phyllomedusa: Journal of Herpetology 15.1 (2016): 51-64.	No	Haddad, C. F. B., Toledo, L. F., Prado, C. P. A., Loebmann, D., Gasparini, J. L., Sazima, I. 2013. Guia dos Anfíbios da Mata Atlântica - Diversidade e Biologia / Guide to the Amphibians of the Atlantic Forest: Diversity and Biology. Anolis Books Editora, 1st Edition. São Paulo, Brazil. 550p.
Hyloidea	Hylidae	Boana	Boana stenocephala	ZUEC-AMP 5359	25.95	12.97	0.87		n/a	n/a	n/a	n/a
Hyloidea	Hylidae	Boana	Boana tetete	n/a	31.72	17.62	2.62	Caminer, Marcel A., and Santiago R. Ron. "Systematics of treefrogs of the Hypsiboas calcaratus and Hypsiboas fasciatus species complex (Anura, Hylidae) with the description of four new species." Zookeys 370 (2014): 1.	1938.47	Tonini, João Filipe Riva, et al. "Allometric escape from acoustic constraints is rare for frog calls." Ecology and Evolution 10.8 (2020): 3686-3695.	No	Caminer, Marcel A., and Santiago R. Ron. "Systematics of treefrogs of the Hypsiboas calcaratus and Hypsiboas fasciatus species complex (Anura, Hylidae) with the description of four new species." Zookeys 370 (2014): 1.
Hyloidea	Hylidae	Bokermannohyla	Bokermannohyla ahenea	ZUEC-AMP 5480	48.02	25.53	2.46		1360.92	Tonini, João Filipe Riva, et al. "Allometric escape from acoustic constraints is rare for frog calls." Ecology and Evolution 10.8 (2020): 3686-3695.	No	Haddad, C. F. B., Toledo, L. F., Prado, C. P. A., Loebmann, D., Gasparini, J. L., Sazima, I. 2013. Guia dos Anfíbios da Mata Atlântica - Diversidade e Biologia / Guide to the Amphibians of the Atlantic Forest: Diversity and Biology. Anolis Books Editora, 1st Edition. São Paulo, Brazil. 550p.
Hyloidea	Hylidae	Bokermannohyla	Bokermannohyla alvarengai	ZUEC-AMP 2473	95.67	54.15	5.8		400	Tonini, João Filipe Riva, et al. "Allometric escape from acoustic constraints is rare for frog calls." Ecology and Evolution 10.8 (2020): 3686-3695.	No	Tattersall, Glenn J., Paula C. Eterovick, and Denis V. de Andrade. "Tribute to RG Boutilier: skin colour and body temperature changes in basking Bokermannohyla alvarengai (Bokermann 1956)." Journal of Experimental Biology 209.7 (2006): 1185-1196.
Hyloidea	Hylidae	Bokermannohyla	Bokermannohyla alvarengai	ZUEC-AMP 2840	92.52	53.24	5.36		n/a	n/a	n/a	n/a
Hyloidea	Hylidae	Bokermannohyla	Bokermannohyla alvarengai	ZUEC-AMP 5003	94.52	54.38	5.47		n/a	n/a	n/a	n/a
Hyloidea	Hylidae	Bokermannohyla	Bokermannohyla astartea	ZUEC-AMP 6401	39.3	20.56	1.92		1986	Tonini, João Filipe Riva, et al. "Allometric escape from acoustic constraints is rare for frog calls." Ecology and Evolution 10.8 (2020): 3686-3695.	No	Haddad, C. F. B., Toledo, L. F., Prado, C. P. A., Loebmann, D., Gasparini, J. L., Sazima, I. 2013. Guia dos Anfíbios da Mata Atlântica - Diversidade e Biologia / Guide to the Amphibians of the Atlantic Forest: Diversity and Biology. Anolis Books Editora, 1st Edition. São Paulo, Brazil. 550p.
Hyloidea	Hylidae	Bokermannohyla	Bokermannohyla capra	n/a	50.3	25.7	2.9	Napoli, Marcelo F., and Bruno VS Pimenta. "A new species of the Bokermannohyla circumdata group (Anura: Hylidae) from the coastal forests of Bahia, Northeastern Brazil." Copeia2009.4 (2009): 674-683.	1960	Tonini, João Filipe Riva, et al. "Allometric escape from acoustic constraints is rare for frog calls." Ecology and Evolution 10.8 (2020): 3686-3695.	No	Haddad, C. F. B., Toledo, L. F., Prado, C. P. A., Loebmann, D., Gasparini, J. L., Sazima, I. 2013. Guia dos Anfíbios da Mata Atlântica - Diversidade e Biologia / Guide to the Amphibians of the Atlantic Forest: Diversity and Biology. Anolis Books Editora, 1st Edition. São Paulo, Brazil. 550p.
Hyloidea	Hylidae	Bokermannohyla	Bokermannohyla caramaschii	ZUEC-AMP 22927	48.72	28.75	3.75		n/a	n/a	n/a	n/a
Hyloidea	Hylidae	Bokermannohyla	Bokermannohyla caramaschii	ZUEC-AMP 23589	52.26	29.68	4.54		n/a	n/a	n/a	n/a
Hyloidea	Hylidae	Bokermannohyla	Bokermannohyla caramaschii	ZUEC-AMP 24351	63.8	32.8	5.36		n/a	n/a	YES	Haddad, C. F. B., Toledo, L. F., Prado, C. P. A., Loebmann, D., Gasparini, J. L., Sazima, I. 2013. Guia dos Anfíbios da Mata Atlântica - Diversidade e Biologia / Guide to the Amphibians of the Atlantic Forest: Diversity and Biology. Anolis Books Editora, 1st Edition. São Paulo, Brazil. 550p.
Hyloidea	Hylidae	Bokermannohyla	Bokermannohyla carvalhoi	ZUEC-AMP 7191	57.29	30.08	2.7		1740	Tonini, João Filipe Riva, et al. "Allometric escape from acoustic constraints is rare for frog calls." Ecology and Evolution 10.8 (2020): 3686-3695.	YES	Haddad, C. F. B., Toledo, L. F., Prado, C. P. A., Loebmann, D., Gasparini, J. L., Sazima, I. 2013. Guia dos Anfíbios da Mata Atlântica - Diversidade e Biologia / Guide to the Amphibians of the Atlantic Forest: Diversity and Biology. Anolis Books Editora, 1st Edition. São Paulo, Brazil. 550p.
Hyloidea	Hylidae	Bokermannohyla	Bokermannohyla circumdata	ZUEC-AMP 22793	65.51	34.42	5.4		1460	Tonini, João Filipe Riva, et al. "Allometric escape from acoustic constraints is rare for frog calls." Ecology and Evolution 10.8 (2020): 3686-3695.	No	Haddad, C. F. B., Toledo, L. F., Prado, C. P. A., Loebmann, D., Gasparini, J. L., Sazima, I. 2013. Guia dos Anfíbios da Mata Atlântica - Diversidade e Biologia / Guide to the Amphibians of the Atlantic Forest: Diversity and Biology. Anolis Books Editora, 1st Edition. São Paulo, Brazil. 550p.
Hyloidea	Hylidae	Bokermannohyla	Bokermannohyla circumdata	ZUEC-AMP 6970	64.04	36.34	4.91		n/a	n/a	n/a	n/a
Hyloidea	Hylidae	Bokermannohyla	Bokermannohyla circumdata	ZUEC-AMP 20667	58.69	33.65	3.58		n/a	n/a	n/a	n/a
Hyloidea	Hylidae	Bokermannohyla	Bokermannohyla diamantina	n/a	51.7	25.5	3.7	Napoli, Marcelo Felgueiras, and Flora Acuna Junca. "A new species of the Bokermannohyla circumdata group (Amphibia: Anura: Hylidae) from Chapada Diamantina, state of Bahia, Brazil." Zootaxa 1244.1 (2006): 57-68.	400	Tonini, João Filipe Riva, et al. "Allometric escape from acoustic constraints is rare for frog calls." Ecology and Evolution 10.8 (2020): 3686-3695.	YES	Haddad, C. F. B., Toledo, L. F., Prado, C. P. A., Loebmann, D., Gasparini, J. L., Sazima, I. 2013. Guia dos Anfíbios da Mata Atlântica - Diversidade e Biologia / Guide to the Amphibians of the Atlantic Forest: Diversity and Biology. Anolis Books Editora, 1st Edition. São Paulo, Brazil. 550p.
Hyloidea	Hylidae	Bokermannohyla	Bokermannohyla flavopicta	n/a	60	34.5	4.1	Leite, Felipe Sá Fortes, Tiago Leite Pezzuti, and Paulo Christiano de Anchietta Garcia. "A new species of the Bokermannohyla pseudopseudis group from the Espinhaço range, central Bahia, Brazil (Anura: Hylidae)." Herpetologica68.3 (2012): 401-409.	1500	Tonini, João Filipe Riva, et al. "Allometric escape from acoustic constraints is rare for frog calls." Ecology and Evolution 10.8 (2020): 3686-3695.	YES	Leite, Felipe Sá Fortes, Tiago Leite Pezzuti, and Paulo Christiano de Anchietta Garcia. "A new species of the Bokermannohyla pseudopseudis group from the Espinhaço range, central Bahia, Brazil (Anura: Hylidae)." Herpetologica68.3 (2012): 401-409.
Hyloidea	Hylidae	Bokermannohyla	Bokermannohyla gouveai	n/a	68	36	4.3	Peixoto, Oswaldo Luiz, and Carlos Alberto Gonçalves da Cruz. "New species of Hyla from the" Serra da Mantiqueira, Itatiaia, Rio de Janeiro" State-(Amphibia, Anura, Hylidae)." Memórias do Instituto Oswaldo Cruz 87 (1992): 197-200.	n/a	n/a	No	Haddad, C. F. B., Toledo, L. F., Prado, C. P. A., Loebmann, D., Gasparini, J. L., Sazima, I. 2013. Guia dos Anfíbios da Mata Atlântica - Diversidade e Biologia / Guide to the Amphibians of the Atlantic Forest: Diversity and Biology. Anolis Books Editora, 1st Edition. São Paulo, Brazil. 550p.
Hyloidea	Hylidae	Bokermannohyla	Bokermannohyla hylax	ZUEC-AMP 8956	64.78	35.75	3.8		2000	Tonini, João Filipe Riva, et al. "Allometric escape from acoustic constraints is rare for frog calls." Ecology and Evolution 10.8 (2020): 3686-3695.	No	Haddad, C. F. B., Toledo, L. F., Prado, C. P. A., Loebmann, D., Gasparini, J. L., Sazima, I. 2013. Guia dos Anfíbios da Mata Atlântica - Diversidade e Biologia / Guide to the Amphibians of the Atlantic Forest: Diversity and Biology. Anolis Books Editora, 1st Edition. São Paulo, Brazil. 550p.
Hyloidea	Hylidae	Bokermannohyla	Bokermannohyla hylax	ZUEC-AMP 3534	46.11	26.85	2.26		n/a	n/a	n/a	n/a
Hyloidea	Hylidae	Bokermannohyla	Bokermannohyla hylax	ZUEC-AMP 8422	61.79	33.1	3.3		n/a	n/a	n/a	n/a
Hyloidea	Hylidae	Bokermannohyla	Bokermannohyla hylax	ZUEC-AMP 11604	62.81	35.77	3.99		n/a	n/a	n/a	n/a
Hyloidea	Hylidae	Bokermannohyla	Bokermannohyla ibitiguara	ZUEC-AMP 10723	43.24	22.42	2.58		2024	Tonini, João Filipe Riva, et al. "Allometric escape from acoustic constraints is rare for frog calls." Ecology and Evolution 10.8 (2020): 3686-3695.	YES	Nali, Renato C., and Cynthia PA Prado. "Complex call with different messages in Bokermannohyla ibitiguara (Anura, Hylidae), a gladiator frog of the Brazilian Cerrado." Journal of Herpetology 48.3 (2014): 407-414.
Hyloidea	Hylidae	Bokermannohyla	Bokermannohyla ibitiguara	ZUEC-AMP 10722	46.46	22.48	2.88		n/a	n/a	n/a	n/a
Hyloidea	Hylidae	Bokermannohyla	Bokermannohyla ibitiguara	ZUEC-AMP 10766	45.44	24	2.49		n/a	n/a	n/a	n/a
Hyloidea	Hylidae	Bokermannohyla	Bokermannohyla ibitipoca	ZUEC-AMP 16125	40.5	18.93	2.09		1700	Tonini, João Filipe Riva, et al. "Allometric escape from acoustic constraints is rare for frog calls." Ecology and Evolution 10.8 (2020): 3686-3695.	YES	Haddad, C. F. B., Toledo, L. F., Prado, C. P. A., Loebmann, D., Gasparini, J. L., Sazima, I. 2013. Guia dos Anfíbios da Mata Atlântica - Diversidade e Biologia / Guide to the Amphibians of the Atlantic Forest: Diversity and Biology. Anolis Books Editora, 1st Edition. São Paulo, Brazil. 550p.
Hyloidea	Hylidae	Bokermannohyla	Bokermannohyla ibitipoca	ZUEC-AMP 6516	40.03	21.35	2.02		n/a	n/a	n/a	n/a
Hyloidea	Hylidae	Bokermannohyla	Bokermannohyla ibitipoca	ZUEC-AMP 16122	42.65	20.75	2.51		n/a	n/a	n/a	n/a
Hyloidea	Hylidae	Bokermannohyla	Bokermannohyla itapoty	n/a	40.6	22.1	2.4	Lugli, Luciana, and Célio FB Haddad. "New species of Bokermannohyla (Anura, Hylidae) from Central Bahia, Brazil." Journal of Herpetology 40.1 (2006): 7-16.	2490	Tonini, João Filipe Riva, et al. "Allometric escape from acoustic constraints is rare for frog calls." Ecology and Evolution 10.8 (2020): 3686-3695.	YES	Haddad, C. F. B., Toledo, L. F., Prado, C. P. A., Loebmann, D., Gasparini, J. L., Sazima, I. 2013. Guia dos Anfíbios da Mata Atlântica - Diversidade e Biologia / Guide to the Amphibians of the Atlantic Forest: Diversity and Biology. Anolis Books Editora, 1st Edition. São Paulo, Brazil. 550p.
Hyloidea	Hylidae	Bokermannohyla	Bokermannohyla izecksohni	ZUEC-AMP 14848	30.05	14.74	1.23		Mute species		n/a	n/a
Hyloidea	Hylidae	Bokermannohyla	Bokermannohyla izecksohni	ZUEC-AMP 22761	30.17	15.12	1.8		n/a	n/a	n/a	n/a
Hyloidea	Hylidae	Bokermannohyla	Bokermannohyla juiju	n/a	54.4	28.2	3.3	Faivovich, Julián, et al. "A new species of the Bokermannohyla martinsi group from central Bahia, Brazil with comments on Bokermannohyla (Anura: Hylidae)." Herpetologica 65.3 (2009): 303-310.	1636.5	Tonini, João Filipe Riva, et al. "Allometric escape from acoustic constraints is rare for frog calls." Ecology and Evolution 10.8 (2020): 3686-3695.	YES	Faivovich, Julián, et al. "A new species of the Bokermannohyla martinsi group from central Bahia, Brazil with comments on Bokermannohyla (Anura: Hylidae)." Herpetologica 65.3 (2009): 303-310.
Hyloidea	Hylidae	Bokermannohyla	Bokermannohyla langei	n/a	66	n/a	2.2	Bokermann, Werner CA. "Hyla langei, a new frog from Paraná, southern Brasil." Journal of the Ohio Herpetological Society(1965): 49-51.	n/a	n/a	n/a	n/a
Hyloidea	Hylidae	Bokermannohyla	Bokermannohyla lucianae	ZUEC-AMP 16621	50.74	28.59	2.88		1750	Tonini, João Filipe Riva, et al. "Allometric escape from acoustic constraints is rare for frog calls." Ecology and Evolution 10.8 (2020): 3686-3695.	No	Haddad, C. F. B., Toledo, L. F., Prado, C. P. A., Loebmann, D., Gasparini, J. L., Sazima, I. 2013. Guia dos Anfíbios da Mata Atlântica - Diversidade e Biologia / Guide to the Amphibians of the Atlantic Forest: Diversity and Biology. Anolis Books Editora, 1st Edition. São Paulo, Brazil. 550p.
Hyloidea	Hylidae	Bokermannohyla	Bokermannohyla luctuosa	ZUEC-AMP 11523	60.98	31.61	4.78		880	Tonini, João Filipe Riva, et al. "Allometric escape from acoustic constraints is rare for frog calls." Ecology and Evolution 10.8 (2020): 3686-3695.	No	Haddad, C. F. B., Toledo, L. F., Prado, C. P. A., Loebmann, D., Gasparini, J. L., Sazima, I. 2013. Guia dos Anfíbios da Mata Atlântica - Diversidade e Biologia / Guide to the Amphibians of the Atlantic Forest: Diversity and Biology. Anolis Books Editora, 1st Edition. São Paulo, Brazil. 550p.
Hyloidea	Hylidae	Bokermannohyla	Bokermannohyla luctuosa	ZUEC-AMP 9793	58.12	31.24	3.95		n/a	n/a	n/a	n/a
Hyloidea	Hylidae	Bokermannohyla	Bokermannohyla luctuosa	ZUEC-AMP 16155	63.2	33.12	4.48		n/a	n/a	n/a	n/a
Hyloidea	Hylidae	Bokermannohyla	Bokermannohyla martinsi	ZUEC-AMP 3439	38.24	21.52	1.73		963.7	Tonini, João Filipe Riva, et al. "Allometric escape from acoustic constraints is rare for frog calls." Ecology and Evolution 10.8 (2020): 3686-3695.	YES	Haddad, C. F. B., Toledo, L. F., Prado, C. P. A., Loebmann, D., Gasparini, J. L., Sazima, I. 2013. Guia dos Anfíbios da Mata Atlântica - Diversidade e Biologia / Guide to the Amphibians of the Atlantic Forest: Diversity and Biology. Anolis Books Editora, 1st Edition. São Paulo, Brazil. 550p.
Hyloidea	Hylidae	Bokermannohyla	Bokermannohyla martinsi	ZUEC-AMP 5026	44.88	25.76	2.13		n/a	n/a	n/a	n/a
Hyloidea	Hylidae	Bokermannohyla	Bokermannohyla nanuzae	ZUEC-AMP 3023	41.79	20.92	2.08		2470	Tonini, João Filipe Riva, et al. "Allometric escape from acoustic constraints is rare for frog calls." Ecology and Evolution 10.8 (2020): 3686-3695.	YES	Haddad, C. F. B., Toledo, L. F., Prado, C. P. A., Loebmann, D., Gasparini, J. L., Sazima, I. 2013. Guia dos Anfíbios da Mata Atlântica - Diversidade e Biologia / Guide to the Amphibians of the Atlantic Forest: Diversity and Biology. Anolis Books Editora, 1st Edition. São Paulo, Brazil. 550p.
Hyloidea	Hylidae	Bokermannohyla	Bokermannohyla nanuzae	ZUEC-AMP 3027	38.16	19.61	1.7		n/a	n/a	n/a	n/a
Hyloidea	Hylidae	Bokermannohyla	Bokermannohyla nanuzae	ZUEC-AMP 3029	44.59	21.7	2.14		n/a	n/a	n/a	n/a
Hyloidea	Hylidae	Bokermannohyla	Bokermannohyla napolii	n/a	52.5	28.5	4	Carvalho, Thiago Ribeiro de, Ariovaldo Antonio Giaretta, and Leandro Magrini. "A new species of the Bokermannohyla circumdata group (Anura: Hylidae) from southeastern Brazil, with bioacoustic data on seven species of the genus." Zootaxa3321.2012 (2012): 37-55.	1091	Tonini, João Filipe Riva, et al. "Allometric escape from acoustic constraints is rare for frog calls." Ecology and Evolution 10.8 (2020): 3686-3695.	No	Carvalho, Thiago Ribeiro de, Ariovaldo Antonio Giaretta, and Leandro Magrini. "A new species of the Bokermannohyla circumdata group (Anura: Hylidae) from southeastern Brazil, with bioacoustic data on seven species of the genus." Zootaxa3321.2012 (2012): 37-55.
Hyloidea	Hylidae	Bokermannohyla	Bokermannohyla oxente	n/a	42	21.8	2.9	Lugli, Luciana, and Célio FB Haddad. "A new species of the Bokermannohyla pseudopseudis group from central Bahia, Brazil (Amphibia, Hylidae)." Herpetologica 62.4 (2006): 453-465.	1450	Tonini, João Filipe Riva, et al. "Allometric escape from acoustic constraints is rare for frog calls." Ecology and Evolution 10.8 (2020): 3686-3695.	YES	Haddad, C. F. B., Toledo, L. F., Prado, C. P. A., Loebmann, D., Gasparini, J. L., Sazima, I. 2013. Guia dos Anfíbios da Mata Atlântica - Diversidade e Biologia / Guide to the Amphibians of the Atlantic Forest: Diversity and Biology. Anolis Books Editora, 1st Edition. São Paulo, Brazil. 550p.
Hyloidea	Hylidae	Bokermannohyla	Bokermannohyla pseudopseudis	ZUEC-AMP 24671	49.66	25.81	2.78		559.6	Tonini, João Filipe Riva, et al. "Allometric escape from acoustic constraints is rare for frog calls." Ecology and Evolution 10.8 (2020): 3686-3695.	YES	Magalhães, R. F., et al. "Sexual dimorphism and resource utilisation by the Veadeiros waterfall frog Bokermannohyla pseudopseudis (Anura: Hylidae)." Salamandra 52.2 (2016): 171-177.
Hyloidea	Hylidae	Bokermannohyla	Bokermannohyla rávida	ZUEC-AMP 9108	37.99	20.66	2.44		n/a	n/a	n/a	n/a
Hyloidea	Hylidae	Bokermannohyla	Bokermannohyla sagarana	n/a	48.9	25.7	4.1	Leite, Felipe Sá Fortes, Tiago Leite Pezzuti, and Leandro de Oliveira Drummond. "A new species of Bokermannohyla from the Espinhaço range, state of Minas Gerais, Southeastern Brazil." Herpetologica 67.4 (2011): 440-448.	n/a	n/a	YES	Leite, Felipe Sá Fortes, Tiago Leite Pezzuti, and Leandro de Oliveira Drummond. "A new species of Bokermannohyla from the Espinhaço range, state of Minas Gerais, Southeastern Brazil." Herpetologica 67.4 (2011): 440-448.
Hyloidea	Hylidae	Bokermannohyla	Bokermannohyla sapiranga	n/a	46.98	25.52	2.95	Brandao, Reuber Albuquerque, et al. "A new species of Bokermannohyla (Anura: Hylidae) from highlands of Central Brazil." Zootaxa 3527.1 (2012): 28-42.	669	Tonini, João Filipe Riva, et al. "Allometric escape from acoustic constraints is rare for frog calls." Ecology and Evolution 10.8 (2020): 3686-3695.	YES	Brandao, Reuber Albuquerque, et al. "A new species of Bokermannohyla (Anura: Hylidae) from highlands of Central Brazil." Zootaxa 3527.1 (2012): 28-42.
Hyloidea	Hylidae	Bokermannohyla	Bokermannohyla saxicola	ZUEC-AMP 1680	52.93	26.34	2.37		1200	Tonini, João Filipe Riva, et al. "Allometric escape from acoustic constraints is rare for frog calls." Ecology and Evolution 10.8 (2020): 3686-3695.	YES	Eterovick, Paula C., et al. "Small scale population structure in the treefrog Bokermannohyla saxicola (Bokermann, 1964)(Anura, Hylidae)." south american Journal of herpetology 4.3 (2009): 235-244.
Hyloidea	Hylidae	Bokermannohyla	Bokermannohyla saxicola	ZUEC-AMP 1558	52.69	26.69	2.14		n/a	n/a	n/a	n/a
Hyloidea	Hylidae	Bokermannohyla	Bokermannohyla saxicola	ZUEC-AMP 2213	51.45	27.81	1.65		n/a	n/a	n/a	n/a
Hyloidea	Hylidae	Bokermannohyla	Bokermannohyla sazimai	ZUEC-AMP 12064	35.98	18.53	1.84		2450	Tonini, João Filipe Riva, et al. "Allometric escape from acoustic constraints is rare for frog calls." Ecology and Evolution 10.8 (2020): 3686-3695.	YES	Giasson, Luís Olímpio Menta. "Amphibia, Hylidae, Bokermannohyla sazimai (Cardoso and Andrade 1982): distribution extension." Check List 2.3 (2006): 7-8.
Hyloidea	Hylidae	Bokermannohyla	Bokermannohyla sazimai	ZUEC-AMP 12063	34.36	17.43	1.74		n/a	n/a	n/a	n/a
Hyloidea	Hylidae	Bokermannohyla	Bokermannohyla sazimai	ZUEC-AMP 12065	31.58	16.7	1.66		n/a	n/a	n/a	n/a
Hyloidea	Hylidae	Bokermannohyla	Bokermannohyla vulcaniae	n/a	50.2	26.9	5	Herp, Rev Esp. "A new species of Hyla (Anura: Hylidae) from southeastern Brazil." Rev. Esp. Herp 17 (2003): 21-27.	1140	Tonini, João Filipe Riva, et al. "Allometric escape from acoustic constraints is rare for frog calls." Ecology and Evolution 10.8 (2020): 3686-3695.	YES	Herp, Rev Esp. "A new species of Hyla (Anura: Hylidae) from southeastern Brazil." Rev. Esp. Herp 17 (2003): 21-27.
Hyloidea	Hylidae	Bromeliohyla	Bromeliohyla melacaena	n/a	22.6	11.6	1	McCranie, James R., and Franklin E. Castañeda. "A new species of hylid frog from northwestern Honduras." Herpetologica 62.3 (2006): 318-323.	n/a	n/a	No	McCranie, James R., and Franklin E. Castañeda. "A new species of hylid frog from northwestern Honduras." Herpetologica 62.3 (2006): 318-323.
Hyloidea	Hylidae	Charadrahyla	Charadrahyla chaneque	n/a	56.2	28.2	2.6	Mendelson Iii, Joseph R., and Jonathan A. Campbell. "The taxonomic status of populations referred to Hyla chaneque in southern Mexico, with the description of a new treefrog from Oaxaca." Journal of Herpetology (1999): 80-86.	n/a	n/a	n/a	n/a
Hyloidea	Hylidae	Charadrahyla	Charadrahyla esperancensis	n/a	48.9	25.2	2.61	Canseco-Márquez, Luis, Cynthia Grisell Ramírez-González, and Edna González-Bernal. "Discovery of another new species of Charadrahyla (Anura, Hylidae) from the cloud forest of northern Oaxaca, México." Zootaxa 4329.1 (2017): 64-72.	n/a	n/a	YES	Canseco-Márquez, Luis, Cynthia Grisell Ramírez-González, and Edna González-Bernal. "Discovery of another new species of Charadrahyla (Anura, Hylidae) from the cloud forest of northern Oaxaca, México." Zootaxa 4329.1 (2017): 64-72.
Hyloidea	Hylidae	Charadrahyla	Charadrahyla nephila	n/a	56.9	28	2.9	Mendelson Iii, Joseph R., and Jonathan A. Campbell. "The taxonomic status of populations referred to Hyla chaneque in southern Mexico, with the description of a new treefrog from Oaxaca." Journal of Herpetology (1999): 80-86.	n/a	n/a	YES	Mendelson Iii, Joseph R., and Jonathan A. Campbell. "The taxonomic status of populations referred to Hyla chaneque in southern Mexico, with the description of a new treefrog from Oaxaca." Journal of Herpetology (1999): 80-86.
Hyloidea	Hylidae	Charadrahyla	Charadrahyla sakbah	n/a	73.21	39.98	2.85	Jimenez-Arcos, Victor H., et al. "A new species of Charadrahyla (Anura: Hylidae) from the cloud forest of western Oaxaca, Mexico." Zootaxa 4554.2 (2019): 371-385.	n/a	n/a	YES	Jimenez-Arcos, Victor H., et al. "A new species of Charadrahyla (Anura: Hylidae) from the cloud forest of western Oaxaca, Mexico." Zootaxa 4554.2 (2019): 371-385.
Hyloidea	Hylidae	Charadrahyla	Charadrahyla taeniopus	ZUEC-AMP 18769	57.76	29.83	1.99		n/a	n/a	n/a	n/a
Hyloidea	Hylidae	Charadrahyla	Charadrahyla taeniopus	ZUEC-AMP 18770	67.68	33.7	2.88		n/a	n/a	YES	Serrano, Jose Manuel. "The amplectant and aggressive calls and notes on the reproductive behaviour of the Porthole Frog (Charadrahyla taeniopus)." Herpetology Notes 11 (2018): 819-823.
Hyloidea	Hylidae	Charadrahyla	Charadrahyla tecuani	n/a	55.1	29.9	2.5	Campbell, Jonathan A., J. Cristian Blancas-Hernández, and Eric N. Smith. "A new species of stream-breeding treefrog of the genus Charadrahyla (Hylidae) from the Sierra Madre del Sur of Guerrero, Mexico." Copeia 2009.2 (2009): 287-295.	n/a	n/a	YES	Campbell, Jonathan A., J. Cristian Blancas-Hernández, and Eric N. Smith. "A new species of stream-breeding treefrog of the genus Charadrahyla (Hylidae) from the Sierra Madre del Sur of Guerrero, Mexico." Copeia 2009.2 (2009): 287-295.
Hyloidea	Hylidae	Corythomantis	Corythomantis greeningi	ZUEC-AMP 4004	62.75	28	2.69		990	Tonini, João Filipe Riva, et al. "Allometric escape from acoustic constraints is rare for frog calls." Ecology and Evolution 10.8 (2020): 3686-3695.	No	Jared, Carlos, et al. "Some aspects of the natural history of the casque-headed tree frog Corythomantis greeningi Boulenger (Hylidae)." Annales des sciences naturelles-zoologie et biologie animale. Vol. 20. No. 3. Elsevier Masson, 1999.
Hyloidea	Hylidae	Corythomantis	Corythomantis greeningi	ZUEC-AMP 4124	56.5	25.64	2.98		n/a	n/a	n/a	n/a
Hyloidea	Hylidae	Corythomantis	Corythomantis greeningi	ZUEC-AMP 10863	61.57	27.35	2.9		n/a	n/a	n/a	n/a
Hyloidea	Hylidae	Dendropsophus	Dendropsophus acreanus	ZUEC-AMP 4665	34.96	17.16	1.87		3459.6	Tonini, João Filipe Riva, et al. "Allometric escape from acoustic constraints is rare for frog calls." Ecology and Evolution 10.8 (2020): 3686-3695.	No	Bernarde, Paulo Sérgio. "Ambientes e temporada de vocalização da anurofauna no Município de Espigão do Oeste, Rondônia, Sudoeste da Amazônia: Brasil (Amphibia: Anura)." Biota Neotropica 7.2 (2007): 0-0.
Hyloidea	Hylidae	Dendropsophus	Dendropsophus acreanus	ZUEC-AMP 4573	33.08	16.99	1.8		n/a	n/a	n/a	n/a
Hyloidea	Hylidae	Dendropsophus	Dendropsophus acreanus	ZUEC-AMP 11045	35.22	17.32	2.08		n/a	n/a	n/a	n/a
Hyloidea	Hylidae	Dendropsophus	Dendropsophus amicorum	n/a	22.6	12.8	0.9	Mijares-Urrutia, A. "Una nueva especie de rana arborícola (Amphibia: Hylidae: Hyla) de un bosque nublado del oeste de Venezuela." Revista Brasileira de Biologia 58 (1998): 659-663.	n/a	n/a	n/a	n/a
Hyloidea	Hylidae	Dendropsophus	Dendropsophus anataliasiasi	ZUEC-AMP 10158	20.53	10.48	0.78		n/a	n/a	n/a	n/a
Hyloidea	Hylidae	Dendropsophus	Dendropsophus anataliasiasi	ZUEC-AMP 10171	21.5	9.77	0.61		n/a	n/a	n/a	n/a
Hyloidea	Hylidae	Dendropsophus	Dendropsophus anataliasiasi	ZUEC-AMP 10178	21.14	9.1	0.52		n/a	n/a	n/a	n/a
Hyloidea	Hylidae	Dendropsophus	Dendropsophus anceps	ZUEC-AMP 18822	36.26	18.96	2.05		3244	Tonini, João Filipe Riva, et al. "Allometric escape from acoustic constraints is rare for frog calls." Ecology and Evolution 10.8 (2020): 3686-3695.	No	Haddad, C. F. B., Toledo, L. F., Prado, C. P. A., Loebmann, D., Gasparini, J. L., Sazima, I. 2013. Guia dos Anfíbios da Mata Atlântica - Diversidade e Biologia / Guide to the Amphibians of the Atlantic Forest: Diversity and Biology. Anolis Books Editora, 1st Edition. São Paulo, Brazil. 550p.
Hyloidea	Hylidae	Dendropsophus	Dendropsophus anceps	ZUEC-AMP 18819	35.49	19.49	2.1		n/a	n/a	n/a	n/a
Hyloidea	Hylidae	Dendropsophus	Dendropsophus anceps	ZUEC-AMP 18820	38.58	20.85	2.2		n/a	n/a	n/a	n/a
Hyloidea	Hylidae	Dendropsophus	Dendropsophus anceps	ZUEC-AMP 18821	36.84	19.85	2.1		n/a	n/a	n/a	n/a
Hyloidea	Hylidae	Dendropsophus	Dendropsophus aperomeus	n/a	21	11.1	0.9	Duellman, William E. "A new species of small yellow Hyla from Peru (Anura: Hylidae)." Amphibia-Reptilia 3.2 (1982): 153-160.	n/a	n/a	n/a	n/a
Hyloidea	Hylidae	Dendropsophus	Dendropsophus araguaya	n/a	19.8	9.9	0.9	Napoli, M. F., and U. Caramaschi. 1998. Duas novas espécies de Hyla Laurenti, 1768 do Brasil central afins de H. tritaeniata Bokermann, 1965. Boletim do Museu Nacional. Nova Serie, Zoologia. Rio de Janeiro 391: 1–12.	n/a	n/a	n/a	n/a
Hyloidea	Hylidae	Dendropsophus	Dendropsophus arndti	n/a	26.7	14.1	2.3	Caminer, Marcel A., et al. "Systematics of the Dendropsophus leucophyllatus species complex (Anura: Hylidae): Cryptic diversity and the description of two new species." PloS one12.3 (2017): e0171785.	2655.37	Caminer, Marcel A., et al. "Systematics of the Dendropsophus leucophyllatus species complex (Anura: Hylidae): Cryptic diversity and the description of two new species." PloS one12.3 (2017): e0171785.	No	Caminer, Marcel A., et al. "Systematics of the Dendropsophus leucophyllatus species complex (Anura: Hylidae): Cryptic diversity and the description of two new species." PloS one12.3 (2017): e0171785.
Hyloidea	Hylidae	Dendropsophus	Dendropsophus berthalutzae	ZUEC-AMP 6688	22.16	10.94	0.78		4642.6	Tonini, João Filipe Riva, et al. "Allometric escape from acoustic constraints is rare for frog calls." Ecology and Evolution 10.8 (2020): 3686-3695.	No	Haddad, C. F. B., Toledo, L. F., Prado, C. P. A., Loebmann, D., Gasparini, J. L., Sazima, I. 2013. Guia dos Anfíbios da Mata Atlântica - Diversidade e Biologia / Guide to the Amphibians of the Atlantic Forest: Diversity and Biology. Anolis Books Editora, 1st Edition. São Paulo, Brazil. 550p.
Hyloidea	Hylidae	Dendropsophus	Dendropsophus berthalutzae	ZUEC-AMP 6391	18.73	9.79	0.86		n/a	n/a	n/a	n/a
Hyloidea	Hylidae	Dendropsophus	Dendropsophus berthalutzae	ZUEC-AMP 9912	19.69	10.6	0.85		n/a	n/a	n/a	n/a
Hyloidea	Hylidae	Dendropsophus	Dendropsophus bipunctatus	ZUEC-AMP 8607	26.16	14.16	1.11		5426	Tonini, João Filipe Riva, et al. "Allometric escape from acoustic constraints is rare for frog calls." Ecology and Evolution 10.8 (2020): 3686-3695.	No	Haddad, C. F. B., Toledo, L. F., Prado, C. P. A., Loebmann, D., Gasparini, J. L., Sazima, I. 2013. Guia dos Anfíbios da Mata Atlântica - Diversidade e Biologia / Guide to the Amphibians of the Atlantic Forest: Diversity and Biology. Anolis Books Editora, 1st Edition. São Paulo, Brazil. 550p.
Hyloidea	Hylidae	Dendropsophus	Dendropsophus bipunctatus	ZUEC-AMP 20711	27.39	14.39	1.06		n/a	n/a	n/a	n/a
Hyloidea	Hylidae	Dendropsophus	Dendropsophus bipunctatus	ZUEC-AMP 21176	25.78	14.48	1.02		n/a	n/a	n/a	n/a
Hyloidea	Hylidae	Dendropsophus	Dendropsophus bokermanni	ZUEC-AMP 8470	18.42	10.79	0.98		4459	Tonini, João Filipe Riva, et al. "Allometric escape from acoustic constraints is rare for frog calls." Ecology and Evolution 10.8 (2020): 3686-3695.	No	Bernarde, Paulo Sérgio. "Ambientes e temporada de vocalização da anurofauna no Município de Espigão do Oeste, Rondônia, Sudoeste da Amazônia: Brasil (Amphibia: Anura)." Biota Neotropica 7.2 (2007): 0-0.
Hyloidea	Hylidae	Dendropsophus	Dendropsophus bokermanni	ZUEC-AMP 8474	19.16	10.35	0.98		n/a	n/a	n/a	n/a
Hyloidea	Hylidae	Dendropsophus	Dendropsophus bokermanni	ZUEC-AMP 8494	18.85	10.08	0.94		n/a	n/a	n/a	n/a
Hyloidea	Hylidae	Dendropsophus	Dendropsophus branneri	ZUEC-AMP 3573	16.55	9.29	0.76		6150	Tonini, João Filipe Riva, et al. "Allometric escape from acoustic constraints is rare for frog calls." Ecology and Evolution 10.8 (2020): 3686-3695.	No	Haddad, C. F. B., Toledo, L. F., Prado, C. P. A., Loebmann, D., Gasparini, J. L., Sazima, I. 2013. Guia dos Anfíbios da Mata Atlântica - Diversidade e Biologia / Guide to the Amphibians of the Atlantic Forest: Diversity and Biology. Anolis Books Editora, 1st Edition. São Paulo, Brazil. 550p.
Hyloidea	Hylidae	Dendropsophus	Dendropsophus branneri	ZUEC-AMP 8317	17.57	8.84	0.92		n/a	n/a	n/a	n/a
Hyloidea	Hylidae	Dendropsophus	Dendropsophus branneri	ZUEC-AMP 10802	17.52	9.54	0.83		n/a	n/a	n/a	n/a
Hyloidea	Hylidae	Dendropsophus	Dendropsophus brevifrons	ZUEC-AMP 5833	18.98	10.39	1.18		4625	Tonini, João Filipe Riva, et al. "Allometric escape from acoustic constraints is rare for frog calls." Ecology and Evolution 10.8 (2020): 3686-3695.	n/a	n/a
Hyloidea	Hylidae	Dendropsophus	Dendropsophus brevifrons	ZUEC-AMP 5824	17.44	10.35	1.08		n/a	n/a	n/a	n/a
Hyloidea	Hylidae	Dendropsophus	Dendropsophus brevifrons	ZUEC-AMP 14837	19.4	9.71	1.23		n/a	n/a	n/a	n/a
Hyloidea	Hylidae	Dendropsophus	Dendropsophus bromeliaceus	n/a	16.7	10.5	0.8	Ferreira, R. B., J. Faivovich, K. H. Beard, and J. P. Pombal, Jr. 2015. The first bromeligenous species of Dendropsophus (Anura: Hylidae) from Brazil's Atlantic Forest. PLoS (Public Library of Science) One 10 (12: e0142893): 1–21.	5400	Ferreira, R. B., J. Faivovich, K. H. Beard, and J. P. Pombal, Jr. 2015. The first bromeligenous species of Dendropsophus (Anura: Hylidae) from Brazil's Atlantic Forest. PLoS (Public Library of Science) One 10 (12: e0142893): 1–21.	No	Ferreira, R. B., J. Faivovich, K. H. Beard, and J. P. Pombal, Jr. 2015. The first bromeligenous species of Dendropsophus (Anura: Hylidae) from Brazil's Atlantic Forest. PLoS (Public Library of Science) One 10 (12: e0142893): 1–21.
Hyloidea	Hylidae	Dendropsophus	Dendropsophus cachimbo	n/a	21.3	10.6	1	Napoli, M. F., and U. Caramaschi. 1999. Geographic variation of Hyla rubicundula and Hyla anataliasiasi, with the description of a new species (Anura, Hylidae). Alytes. Paris 16: 165–189.	n/a	n/a	n/a	n/a
Hyloidea	Hylidae	Dendropsophus	Dendropsophus cerradensis	n/a	18.9	9.6	1	Napoli, M. F., and U. Caramaschi. 1998. Duas novas espécies de Hyla Laurenti, 1768 do Brasil central afins de H. tritaeniata Bokermann, 1965. Boletim do Museu Nacional. Nova Serie, Zoologia. Rio de Janeiro 391: 1–12.	n/a	n/a	n/a	n/a
Hyloidea	Hylidae	Dendropsophus	Dendropsophus coffea	n/a	21.1	10.2	1	Köhler, Jörn, Karl-Heinz Jungfer, and Steffen Reichle. "Another new species of small Hyla (Anura, Hylidae) from Amazonian sub-Andean forest of western Bolivia." Journal of Herpetology39.1 (2005): 43-51.	5857.6	Tonini, João Filipe Riva, et al. "Allometric escape from acoustic constraints is rare for frog calls." Ecology and Evolution 10.8 (2020): 3686-3695.	No	Köhler, Jörn, Karl-Heinz Jungfer, and Steffen Reichle. "Another new species of small Hyla (Anura, Hylidae) from Amazonian sub-Andean forest of western Bolivia." Journal of Herpetology39.1 (2005): 43-51.
Hyloidea	Hylidae	Dendropsophus	Dendropsophus counani	n/a	20.9	10.4	1	Fouquet, Antoine, et al. "A new Dendropsophus Fitzinger, 1843 (Anura: Hylidae) of the parviceps group from the lowlands of the Guiana Shield." Zootaxa 4052.1 (2015): 39-64.	3900	Fouquet, Antoine, et al. "A new Dendropsophus Fitzinger, 1843 (Anura: Hylidae) of the parviceps group from the lowlands of the Guiana Shield." Zootaxa 4052.1 (2015): 39-64.	No	Fouquet, Antoine, et al. "A new Dendropsophus Fitzinger, 1843 (Anura: Hylidae) of the parviceps group from the lowlands of the Guiana Shield." Zootaxa 4052.1 (2015): 39-64.
Hyloidea	Hylidae	Dendropsophus	Dendropsophus cruzi	ZUEC-AMP 21239	17.84	10.14	0.64		6322.58	Tonini, João Filipe Riva, et al. "Allometric escape from acoustic constraints is rare for frog calls." Ecology and Evolution 10.8 (2020): 3686-3695.	No	Bastos, R.P., Motta J.A.O., Lima, L.P. & Guimarães, L.D. (2003). Anfíbios da Floresta Nacional de Silvânia, estado de Goiás. Goiânia: R.P. Bastos
Hyloidea	Hylidae	Dendropsophus	Dendropsophus decipiens	ZUEC-AMP 1169	19.65	9.46	0.85		4770	Tonini, João Filipe Riva, et al. "Allometric escape from acoustic constraints is rare for frog calls." Ecology and Evolution 10.8 (2020): 3686-3695.	No	Haddad, C. F. B., Toledo, L. F., Prado, C. P. A., Loebmann, D., Gasparini, J. L., Sazima, I. 2013. Guia dos Anfíbios da Mata Atlântica - Diversidade e Biologia / Guide to the Amphibians of the Atlantic Forest: Diversity and Biology. Anolis Books Editora, 1st Edition. São Paulo, Brazil. 550p.
Hyloidea	Hylidae	Dendropsophus	Dendropsophus decipiens	ZUEC-AMP 1159	19.1	9.85	0.81		n/a	n/a	n/a	n/a
Hyloidea	Hylidae	Dendropsophus	Dendropsophus decipiens	ZUEC-AMP 1160	18.14	9.41	0.79		n/a	n/a	n/a	n/a
Hyloidea	Hylidae	Dendropsophus	Dendropsophus delarivai	n/a	18.6	10	0.8	Kohler, J., and S. Lotters. "Description of a small tree frog, genus Hyla (Anura: Hylidae), from humid Andean slopes of Bolivia." SALAMANDRA-BONN- 37.3 (2001): 175-184.	3699.2	Tonini, João Filipe Riva, et al. "Allometric escape from acoustic constraints is rare for frog calls." Ecology and Evolution 10.8 (2020): 3686-3695.	No	Kohler, J., and S. Lotters. "Description of a small tree frog, genus Hyla (Anura: Hylidae), from humid Andean slopes of Bolivia." SALAMANDRA-BONN- 37.3 (2001): 175-184.
Hyloidea	Hylidae	Dendropsophus	Dendropsophus elegans	ZUEC-AMP 8610	28.58	17.21	1.86		3500	Tonini, João Filipe Riva, et al. "Allometric escape from acoustic constraints is rare for frog calls." Ecology and Evolution 10.8 (2020): 3686-3695.	No	Haddad, C. F. B., Toledo, L. F., Prado, C. P. A., Loebmann, D., Gasparini, J. L., Sazima, I. 2013. Guia dos Anfíbios da Mata Atlântica - Diversidade e Biologia / Guide to the Amphibians of the Atlantic Forest: Diversity and Biology. Anolis Books Editora, 1st Edition. São Paulo, Brazil. 550p.
Hyloidea	Hylidae	Dendropsophus	Dendropsophus elegans	ZUEC-AMP 8642	27.81	15.54	1.47		n/a	n/a	n/a	n/a
Hyloidea	Hylidae	Dendropsophus	Dendropsophus elegans	ZUEC-AMP 9832	27.04	14.56	1.25		n/a	n/a	n/a	n/a
Hyloidea	Hylidae	Dendropsophus	Dendropsophus elianeae	ZUEC-AMP 10492	22.15	11.31	1.3		3300	Tonini, João Filipe Riva, et al. "Allometric escape from acoustic constraints is rare for frog calls." Ecology and Evolution 10.8 (2020): 3686-3695.	n/a	n/a
Hyloidea	Hylidae	Dendropsophus	Dendropsophus elianeae	ZUEC-AMP 10493	21.84	10.6	1.06		n/a	n/a	n/a	n/a
Hyloidea	Hylidae	Dendropsophus	Dendropsophus elianeae	ZUEC-AMP 13134	22.72	11.18	1.09		n/a	n/a	n/a	n/a
Hyloidea	Hylidae	Dendropsophus	Dendropsophus embraccatus	n/a	24.3	n/a	0.89	James, Taylor, Hunter, Ryan. 2021. Evolutionary and allometric insights into anuran auditory sensitivity and morphology. Brain, Behavior and Evolution.	3206.7	James, Taylor, Hunter, Ryan. 2021. Evolutionary and allometric insights into anuran auditory sensitivity and morphology. Brain, Behavior and Evolution.	n/a	n/a
Hyloidea	Hylidae	Dendropsophus	Dendropsophus frosti	n/a	22.8	12.3	1.4	MOTTA, Ana P. et al. A new species of the Dendropsophus parviceps group from the western Amazon Basin (Amphibia: Anura: Hylidae). Zootaxa, v. 3249, n. 1, p. 18-30, 2012.	n/a	n/a	No	MOTTA, Ana P. et al. A new species of the Dendropsophus parviceps group from the western Amazon Basin (Amphibia: Anura: Hylidae). Zootaxa, v. 3249, n. 1, p. 18-30, 2012.
Hyloidea	Hylidae	Dendropsophus	Dendropsophus garagoensis	n/a	23.7	11.4	1.32	Kaplan, Moises. "A new species of Hyla from the eastern slope of the Cordillera Oriental in northern Colombia." Journal of Herpetology (1991): 313-316.	n/a	n/a	No	Kaplan, Moises. "A new species of Hyla from the eastern slope of the Cordillera Oriental in northern Colombia." Journal of Herpetology (1991): 313-316.
Hyloidea	Hylidae	Dendropsophus	Dendropsophus gaucheri	ZUEC-AMP 17681	19.54	10.31	1.26		n/a	n/a	n/a	n/a
Hyloidea	Hylidae	Dendropsophus	Dendropsophus gaucheri	ZUEC-AMP 17682	19.13	10.27	1.22		n/a	n/a	n/a	n/a
Hyloidea	Hylidae	Dendropsophus	Dendropsophus giesleri	ZUEC-AMP 11572	23.69	12.13	1.44		3600	Tonini, João Filipe Riva, et al. "Allometric escape from acoustic constraints is rare for frog calls." Ecology and Evolution 10.8 (2020): 3686-3695.	No	Haddad, C. F. B., Toledo, L. F., Prado, C. P. A., Loebmann, D., Gasparini, J. L., Sazima, I. 2013. Guia dos Anfíbios da Mata Atlântica - Diversidade e Biologia / Guide to the Amphibians of the Atlantic Forest: Diversity and Biology. Anolis Books Editora, 1st Edition. São Paulo, Brazil. 550p.
Hyloidea	Hylidae	Dendropsophus	Dendropsophus giesleri	ZUEC-AMP 6305	24.47	13.1	1.35		n/a	n/a	n/a	n/a
Hyloidea	Hylidae	Dendropsophus	Dendropsophus giesleri	ZUEC-AMP 6564	24.98	12.52	1.36		n/a	n/a	n/a	n/a
Hyloidea	Hylidae	Dendropsophus	Dendropsophus haddadi	ZUEC-AMP 20696	17.4	9.35	1.15		4668	Tonini, João Filipe Riva, et al. "Allometric escape from acoustic constraints is rare for frog calls." Ecology and Evolution 10.8 (2020): 3686-3695.	No	Haddad, C. F. B., Toledo, L. F., Prado, C. P. A., Loebmann, D., Gasparini, J. L., Sazima, I. 2013. Guia dos Anfíbios da Mata Atlântica - Diversidade e Biologia / Guide to the Amphibians of the Atlantic Forest: Diversity and Biology. Anolis Books Editora, 1st Edition. São Paulo, Brazil. 550p.
Hyloidea	Hylidae	Dendropsophus	Dendropsophus haddadi	ZUEC-AMP 20918	18.11	9.45	1.21		n/a	n/a	n/a	n/a
Hyloidea	Hylidae	Dendropsophus	Dendropsophus haddadi	ZUEC-AMP 16618	18.5	10.03	1.16		n/a	n/a	n/a	n/a
Hyloidea	Hylidae	Dendropsophus	Dendropsophus haraldschultzi	ZUEC-AMP 23157	21.95	9.84	1.22		4840	Tonini, João Filipe Riva, et al. "Allometric escape from acoustic constraints is rare for frog calls." Ecology and Evolution 10.8 (2020): 3686-3695.	No	Missassi, Alexandre Felipe Raimundo, et al. "Range extension of the poorly know tree frog Dendropsophus haraldschultzi (Bokermann, 1962)(Amphibia, Anura, Hylidae): first records for two Brazilian Amazon states." Herpetology Notes 10 (2017): 703-707.
Hyloidea	Hylidae	Dendropsophus	Dendropsophus haraldschultzi	ZUEC-AMP 23159	20.83	9.42	1.15		n/a	n/a	n/a	n/a
Hyloidea	Hylidae	Dendropsophus	Dendropsophus haraldschultzi	ZUEC-AMP 23160	20.64	9.45	1.17		n/a	n/a	n/a	n/a
Hyloidea	Hylidae	Dendropsophus	Dendropsophus jimi	ZUEC-AMP 23538	23.3	11.99	1.57		4000	Tonini, João Filipe Riva, et al. "Allometric escape from acoustic constraints is rare for frog calls." Ecology and Evolution 10.8 (2020): 3686-3695.	No	DE MELLO, Pietro Longo Hollanda, et al. "Calling perch selection and body condition in Dendropsophus jimi (Anura: Hylidae)." North-Western Journal of Zoology 14.1 (2018).
Hyloidea	Hylidae	Dendropsophus	Dendropsophus jimi	ZUEC-AMP 23536	21.8	11.24	1.51		n/a	n/a	n/a	n/a
Hyloidea	Hylidae	Dendropsophus	Dendropsophus jimi	ZUEC-AMP 23539	21.07	10.41	1.04		n/a	n/a	n/a	n/a
Hyloidea	Hylidae	Dendropsophus	Dendropsophus joannae	n/a	18.1	8.9	0.9	Köhler, Jörn, and Stefan Lötters. "A new species of minute Hyla from the southwestern Amazon basin (Amphibia, Anura, Hylidae)." Studies on Neotropical Fauna and Environment 36.2 (2001): 105-112.	6949	Tonini, João Filipe Riva, et al. "Allometric escape from acoustic constraints is rare for frog calls." Ecology and Evolution 10.8 (2020): 3686-3695.	No	Köhler, Jörn, and Stefan Lötters. "A new species of minute Hyla from the southwestern Amazon basin (Amphibia, Anura, Hylidae)." Studies on Neotropical Fauna and Environment 36.2 (2001): 105-112.
Hyloidea	Hylidae	Dendropsophus	Dendropsophus juliani	n/a	20.7	10.3	0.8	Moravec, J. I. ?. Í., James Aparicio, and Joern Koehler. "A new species of tree frog, genus Dendropsophus (Anura: Hylidae), from the Amazon of northern Bolivia." Zootaxa 1327.1 (2006): 23-40.	3773	Tonini, João Filipe Riva, et al. "Allometric escape from acoustic constraints is rare for frog calls." Ecology and Evolution 10.8 (2020): 3686-3695.	No	Moravec, J. I. ?. Í., James Aparicio, and Joern Koehler. "A new species of tree frog, genus Dendropsophus (Anura: Hylidae), from the Amazon of northern Bolivia." Zootaxa 1327.1 (2006): 23-40.
Hyloidea	Hylidae	Dendropsophus	Dendropsophus koechlini	ZUEC-AMP 9539	19.27	9.58	1.22		6600	Tonini, João Filipe Riva, et al. "Allometric escape from acoustic constraints is rare for frog calls." Ecology and Evolution 10.8 (2020): 3686-3695.	n/a	n/a
Hyloidea	Hylidae	Dendropsophus	Dendropsophus koechlini	ZUEC-AMP 9540	19.81	10.99	1		n/a	n/a	n/a	n/a
Hyloidea	Hylidae	Dendropsophus	Dendropsophus koechlini	ZUEC-AMP 9542	19.99	10.06	1.15		n/a	n/a	n/a	n/a
Hyloidea	Hylidae	Dendropsophus	Dendropsophus leali	ZUEC-AMP 4660	19.26	9.39	1.22		6706	Tonini, João Filipe Riva, et al. "Allometric escape from acoustic constraints is rare for frog calls." Ecology and Evolution 10.8 (2020): 3686-3695.	No	Marty, Christian, et al. "Report on the occurrence of Dendropsophus leali (Bokermann, 1964)(Anura; Hylidae) in French Guiana." Bulletin de la Société herpétologique de France 148 (2013): 419-424.
Hyloidea	Hylidae	Dendropsophus	Dendropsophus leali	ZUEC-AMP 4583	18.41	8.89	1.02		n/a	n/a	n/a	n/a
Hyloidea	Hylidae	Dendropsophus	Dendropsophus leali	ZUEC-AMP 4683	17.75	8.86	1.27		n/a	n/a	n/a	n/a
Hyloidea	Hylidae	Dendropsophus	Dendropsophus leucophyllatus	ZUEC-AMP 5678	28.88	15.44	1.35		3462	Tonini, João Filipe Riva, et al. "Allometric escape from acoustic constraints is rare for frog calls." Ecology and Evolution 10.8 (2020): 3686-3695.	No	Bernarde, Paulo Sérgio. "Ambientes e temporada de vocalização da anurofauna no Município de Espigão do Oeste, Rondônia, Sudoeste da Amazônia: Brasil (Amphibia: Anura)." Biota Neotropica 7.2 (2007): 0-0.
Hyloidea	Hylidae	Dendropsophus	Dendropsophus leucophyllatus	ZUEC-AMP 7215	29.37	16.75	1.37		n/a	n/a	n/a	n/a
Hyloidea	Hylidae	Dendropsophus	Dendropsophus leucophyllatus	ZUEC-AMP 7230	27.37	14.8	1.18		n/a	n/a	n/a	n/a
Hyloidea	Hylidae	Dendropsophus	Dendropsophus limai	ZUEC-AMP 21765	16.14	9.54	1.33		n/a	n/a	n/a	n/a
Hyloidea	Hylidae	Dendropsophus	Dendropsophus luddeckei	n/a	38.6	19.6	2.3	Guarnizo, Carlos E., et al. "Congruence between acoustic traits and genealogical history reveals a new species of Dendropsophus (Anura: Hylidae) in the high Andes of Colombia." Herpetologica 68.4 (2012): 523-540.	2060	Tonini, João Filipe Riva, et al. "Allometric escape from acoustic constraints is rare for frog calls." Ecology and Evolution 10.8 (2020): 3686-3695.	n/a	n/a
Hyloidea	Hylidae	Dendropsophus	Dendropsophus luteoocellatus	ZUEC-AMP 9469	18.83	9.54	1.19		3600	Tonini, João Filipe Riva, et al. "Allometric escape from acoustic constraints is rare for frog calls." Ecology and Evolution 10.8 (2020): 3686-3695.	n/a	n/a
Hyloidea	Hylidae	Dendropsophus	Dendropsophus luteoocellatus	ZUEC-AMP 9467	20.21	10.32	1.53		n/a	n/a	n/a	n/a
Hyloidea	Hylidae	Dendropsophus	Dendropsophus luteoocellatus	ZUEC-AMP 9468	20.75	9.88	1.61		n/a	n/a	n/a	n/a
Hyloidea	Hylidae	Dendropsophus	Dendropsophus manonegra	n/a	23.7	12.7	1.4	Rivera-Correa, Mauricio, and Victor GD Orrico. "Description and phylogenetic relationships of a new species of treefrog of the Dendropsophus leucophyllatus group (Anura: Hylidae) from the Amazon basin of Colombia and with an exceptional color pattern." Zootaxa 3686.4 (2013): 447-460.	n/a	n/a	n/a	n/a
Hyloidea	Hylidae	Dendropsophus	Dendropsophus mapinguari	n/a	22.2	12.3	1	Peloso, Pedro LV, et al. "A new species of clown tree frog, Dendropsophus leucophyllatus species group, from Amazonia (Anura, Hylidae)." South American Journal of Herpetology 11.1 (2016): 66-81.	n/a	n/a	n/a	n/a
Hyloidea	Hylidae	Dendropsophus	Dendropsophus marmoratus	ZUEC-AMP 6112	33.52	18.36	2.18		2100	Tonini, João Filipe Riva, et al. "Allometric escape from acoustic constraints is rare for frog calls." Ecology and Evolution 10.8 (2020): 3686-3695.	n/a	n/a
Hyloidea	Hylidae	Dendropsophus	Dendropsophus marmoratus	ZUEC-AMP 6111	36.16	18.59	1.87		n/a	n/a	n/a	n/a
Hyloidea	Hylidae	Dendropsophus	Dendropsophus marmoratus	ZUEC-AMP 16042	35.46	19.43	2.04		n/a	n/a	n/a	n/a
Hyloidea	Hylidae	Dendropsophus	Dendropsophus melanargyreus	ZUEC-AMP 3861	32.86	15.33	1.53		3496.5	Tonini, João Filipe Riva, et al. "Allometric escape from acoustic constraints is rare for frog calls." Ecology and Evolution 10.8 (2020): 3686-3695.	No	da Silva, Fernando, Tiago Santos, and Vitor Prado. "Amphibia, Anura, Hylidae, Dendropsophus melanargyreus (Cope, 1887): distribution extension, new state record and geographic distribution map." Check List 6 (2016): 402.
Hyloidea	Hylidae	Dendropsophus	Dendropsophus melanargyreus	ZUEC-AMP 7082	30.92	14.28	1.45		n/a	n/a	n/a	n/a
Hyloidea	Hylidae	Dendropsophus	Dendropsophus melanargyreus	ZUEC-AMP 7421	35.07	17.28	1.49		n/a	n/a	n/a	n/a
Hyloidea	Hylidae	Dendropsophus	Dendropsophus meridianus	ZUEC-AMP 1167	18.33	8.86	1.12		5500	Tonini, João Filipe Riva, et al. "Allometric escape from acoustic constraints is rare for frog calls." Ecology and Evolution 10.8 (2020): 3686-3695.	No	Haddad, C. F. B., Toledo, L. F., Prado, C. P. A., Loebmann, D., Gasparini, J. L., Sazima, I. 2013. Guia dos Anfíbios da Mata Atlântica - Diversidade e Biologia / Guide to the Amphibians of the Atlantic Forest: Diversity and Biology. Anolis Books Editora, 1st Edition. São Paulo, Brazil. 550p.
Hyloidea	Hylidae	Dendropsophus	Dendropsophus meridianus	ZUEC-AMP 1165	18.06	9.48	1.19		n/a	n/a	n/a	n/a
Hyloidea	Hylidae	Dendropsophus	Dendropsophus meridianus	ZUEC-AMP 1166	19.04	9.17	1.39		n/a	n/a	n/a	n/a
Hyloidea	Hylidae	Dendropsophus	Dendropsophus microcephalus	ZUEC-AMP 8633	16.83	8.16	1		5525	Tonini, João Filipe Riva, et al. "Allometric escape from acoustic constraints is rare for frog calls." Ecology and Evolution 10.8 (2020): 3686-3695.	No	Bernarde, Paulo Sérgio. "Ambientes e temporada de vocalização da anurofauna no Município de Espigão do Oeste, Rondônia, Sudoeste da Amazônia: Brasil (Amphibia: Anura)." Biota Neotropica 7.2 (2007): 0-0.
Hyloidea	Hylidae	Dendropsophus	Dendropsophus microcephalus	ZUEC-AMP 9451	15.66	8.24	1.13		n/a	n/a	n/a	n/a
Hyloidea	Hylidae	Dendropsophus	Dendropsophus microcephalus	ZUEC-AMP 22992	21.81	10.81	1.53		n/a	n/a	n/a	n/a
Hyloidea	Hylidae	Dendropsophus	Dendropsophus microcephalus	ZUEC-AMP 22993	20.75	10.41	1.75		n/a	n/a	n/a	n/a
Hyloidea	Hylidae	Dendropsophus	Dendropsophus microps	ZUEC-AMP 6580	28.43	14.09	1.74		5212	Tonini, João Filipe Riva, et al. "Allometric escape from acoustic constraints is rare for frog calls." Ecology and Evolution 10.8 (2020): 3686-3695.	No	Haddad, C. F. B., Toledo, L. F., Prado, C. P. A., Loebmann, D., Gasparini, J. L., Sazima, I. 2013. Guia dos Anfíbios da Mata Atlântica - Diversidade e Biologia / Guide to the Amphibians of the Atlantic Forest: Diversity and Biology. Anolis Books Editora, 1st Edition. São Paulo, Brazil. 550p.
Hyloidea	Hylidae	Dendropsophus	Dendropsophus microps	ZUEC-AMP 801	21.73	11.08	1.36		n/a	n/a	n/a	n/a
Hyloidea	Hylidae	Dendropsophus	Dendropsophus microps	ZUEC-AMP 1088	24.3	12	1.75		n/a	n/a	n/a	n/a
Hyloidea	Hylidae	Dendropsophus	Dendropsophus microps	ZUEC-AMP 1098	22.27	11.11	1.47		n/a	n/a	n/a	n/a
Hyloidea	Hylidae	Dendropsophus	Dendropsophus minusculus	ZUEC-AMP 9400	17.5	8.94	0.96		5180	Tonini, João Filipe Riva, et al. "Allometric escape from acoustic constraints is rare for frog calls." Ecology and Evolution 10.8 (2020): 3686-3695.	No	Zina, J., et al. "The recognition of Dendropsophus minusculus ()(Hylidae, Dendropsophini) as a highly polymorphic, multi-domain distributed species." Brazilian Journal of Biology 74.3 (2014): S146-S153.
Hyloidea	Hylidae	Dendropsophus	Dendropsophus minusculus	ZUEC-AMP 9374	19.56	9.28	1.06		n/a	n/a	n/a	n/a
Hyloidea	Hylidae	Dendropsophus	Dendropsophus minusculus	ZUEC-AMP 9375	18.41	8.95	0.82		n/a	n/a	n/a	n/a
Hyloidea	Hylidae	Dendropsophus	Dendropsophus miyatai	n/a	17.34	9.51	0.61	Vigle, Gregory O., and Deborah CI Goberdhan-Vigle. "A new species of small colorful Hyla from the lowland rainforest of Amazonian Ecuador." Herpetologica (1990): 467-473.	n/a	n/a	n/a	n/a
Hyloidea	Hylidae	Dendropsophus	Dendropsophus nekronastes	n/a	28.5	16.1	1.6	Dias, Iuri Ribeiro, et al. "The 100th: an appealing new species of Dendropsophus (Amphibia: Anura: Hylidae) from northeastern Brazil." PloS one 12.3 (2017): e0171678.	4598.9	Dias, Iuri Ribeiro, et al. "The 100th: an appealing new species of Dendropsophus (Amphibia: Anura: Hylidae) from northeastern Brazil." PloS one 12.3 (2017): e0171678.	No	Dias, Iuri Ribeiro, et al. "The 100th: an appealing new species of Dendropsophus (Amphibia: Anura: Hylidae) from northeastern Brazil." PloS one 12.3 (2017): e0171678.
Hyloidea	Hylidae	Dendropsophus	Dendropsophus norandinus	n/a	35.8	16.9	1.7	Rivera-Correa, Mauricio, and PAUL DAVID ALFONSO Gutiérrez-Cárdenas. "A new highland species of treefrog of the Dendropsophus columbianus group (Anura: Hylidae) from the Andes of Colombia." Zootaxa 3486.1 (2012): 50-62.	n/a	n/a	No	Rivera-Correa, Mauricio, and PAUL DAVID ALFONSO Gutiérrez-Cárdenas. "A new highland species of treefrog of the Dendropsophus columbianus group (Anura: Hylidae) from the Andes of Colombia." Zootaxa 3486.1 (2012): 50-62.
Hyloidea	Hylidae	Dendropsophus	Dendropsophus novaisi	n/a	39	n/a	2	Bokermann, Werner CA. "Three new Hyla from the plateau of Maracás, central Bahia, Brazil." Journal of Herpetology (1968): 25-31.	3359.4		No	Haddad, C. F. B., Toledo, L. F., Prado, C. P. A., Loebmann, D., Gasparini, J. L., Sazima, I. 2013. Guia dos Anfíbios da Mata Atlântica - Diversidade e Biologia / Guide to the Amphibians of the Atlantic Forest: Diversity and Biology. Anolis Books Editora, 1st Edition. São Paulo, Brazil. 550p.
Hyloidea	Hylidae	Dendropsophus	Dendropsophus ozzyi	n/a	19.5	10.3	1	Orrico, Victor GD, et al. "A new “bat-voiced” species of Dendropsophus Fitzinger, 1843 (Anura, Hylidae) from the Amazon Basin, Brazil." Zootaxa 3881.4 (2014): 341-361.	9560.7	Orrico, Victor GD, et al. "A new “bat-voiced” species of Dendropsophus Fitzinger, 1843 (Anura, Hylidae) from the Amazon Basin, Brazil." Zootaxa 3881.4 (2014): 341-361.	No	Orrico, Victor GD, et al. "A new “bat-voiced” species of Dendropsophus Fitzinger, 1843 (Anura, Hylidae) from the Amazon Basin, Brazil." Zootaxa 3881.4 (2014): 341-361.
Hyloidea	Hylidae	Dendropsophus	Dendropsophus padreluna	n/a	27.2	n/a	1.1	KAPLAN, Moises; RUÍZ, Pedro M. Two new species of Hyla from the Andes of Central Colombia and their relationships to other small Andean Hyla. Journal of Herpetology, p. 230-244, 1997.	n/a	n/a	No	KAPLAN, Moises; RUÍZ, Pedro M. Two new species of Hyla from the Andes of Central Colombia and their relationships to other small Andean Hyla. Journal of Herpetology, p. 230-244, 1997.
Hyloidea	Hylidae	Dendropsophus	Dendropsophus phlebodes	n/a	22	n/a	0.85	James, Taylor, Hunter, Ryan. 2021. Evolutionary and allometric insights into anuran auditory sensitivity and morphology. Brain, Behavior and Evolution.	3496.43	James, Taylor, Hunter, Ryan. 2021. Evolutionary and allometric insights into anuran auditory sensitivity and morphology. Brain, Behavior and Evolution.	n/a	n/a
Hyloidea	Hylidae	Dendropsophus	Dendropsophus reichlei	n/a	18.7	9.6	0.9	Moravec, J. I. ?. Í., et al. "Diversity of small Amazonian Dendropsophus (Anura: Hylidae): another new species from northern Bolivia." Zootaxa 1918 (2008): 1-12.	6363	Moravec, J. I. ?. Í., et al. "Diversity of small Amazonian Dendropsophus (Anura: Hylidae): another new species from northern Bolivia." Zootaxa 1918 (2008): 1-12.	No	Moravec, J. I. ?. Í., et al. "Diversity of small Amazonian Dendropsophus (Anura: Hylidae): another new species from northern Bolivia." Zootaxa 1918 (2008): 1-12.
Hyloidea	Hylidae	Dendropsophus	Dendropsophus salli	n/a	27.7	14.6	1.3	Jungfer, Karl-Heinz, Steffen Reichle, and Oliver Piskurek. "Description of a new cryptic southwestern Amazonian species of leaf-gluing treefrog, genus Dendropsophus (Amphibia: Anura: Hylidae)." Salamandra 46.4 (2010): 204-213.	2890	Jungfer, Karl-Heinz, Steffen Reichle, and Oliver Piskurek. "Description of a new cryptic southwestern Amazonian species of leaf-gluing treefrog, genus Dendropsophus (Amphibia: Anura: Hylidae)." Salamandra 46.4 (2010): 204-213.	No	Jungfer, Karl-Heinz, Steffen Reichle, and Oliver Piskurek. "Description of a new cryptic southwestern Amazonian species of leaf-gluing treefrog, genus Dendropsophus (Amphibia: Anura: Hylidae)." Salamandra 46.4 (2010): 204-213.
Hyloidea	Hylidae	Dendropsophus	Dendropsophus shiwiarum	n/a	17.31	9.06	0.82	Ortega-Andrade, H. MAURICIO, and Santiago R. Ron. "A new species of small tree frog, genus Dendropsophus (Anura: Hylidae) from the eastern Amazon lowlands of Ecuador." Zootaxa 3652.1 (2013): 163-178.	4714.5	Tonini, João Filipe Riva, et al. "Allometric escape from acoustic constraints is rare for frog calls." Ecology and Evolution 10.8 (2020): 3686-3695.	No	Ortega-Andrade, H. MAURICIO, and Santiago R. Ron. "A new species of small tree frog, genus Dendropsophus (Anura: Hylidae) from the eastern Amazon lowlands of Ecuador." Zootaxa 3652.1 (2013): 163-178.
Hyloidea	Hylidae	Dendropsophus	Dendropsophus soaresi	n/a	30.9	13.5	1.8	CARAMASCHI, ULISSES, and JORGE JIM. "UMA NOVA ESPÉCIE DE HYU DO GRUPO MARMORATA DO NORDESTE BRASILEIRO (AMPHIBIA, ANURA, HYLIDAE)'." (1983).	3286.67	Tonini, João Filipe Riva, et al. "Allometric escape from acoustic constraints is rare for frog calls." Ecology and Evolution 10.8 (2020): 3686-3695.	No	Haddad, C. F. B., Toledo, L. F., Prado, C. P. A., Loebmann, D., Gasparini, J. L., Sazima, I. 2013. Guia dos Anfíbios da Mata Atlântica - Diversidade e Biologia / Guide to the Amphibians of the Atlantic Forest: Diversity and Biology. Anolis Books Editora, 1st Edition. São Paulo, Brazil. 550p.
Hyloidea	Hylidae	Dendropsophus	Dendropsophus stingi	n/a	22.9	11.9	1.2	Kaplan, Moises. "A new species of frog of the genus Hyla from the Cordillera Oriental in northern Colombia with comments on the taxonomy of Hyla minuta." Journal of Herpetology (1994): 79-87.	n/a	n/a	n/a	n/a
Hyloidea	Hylidae	Dendropsophus	Dendropsophus studerae	n/a	24.6	13	1.2	Carvalho-e-Silva, SPd, A. M. P. T. Carvalho-e-Silva, and E. Izecksohn. "Nova espécie de Hyla Laurenti do grupo de H. microcephala Cope (Amphibia, Anura, Hylidae) do nordeste do Brasil." Revista Brasileira de Zoologia 20.3 (2003): 553-558.	5790	Tonini, João Filipe Riva, et al. "Allometric escape from acoustic constraints is rare for frog calls." Ecology and Evolution 10.8 (2020): 3686-3695.	No	Haddad, C. F. B., Toledo, L. F., Prado, C. P. A., Loebmann, D., Gasparini, J. L., Sazima, I. 2013. Guia dos Anfíbios da Mata Atlântica - Diversidade e Biologia / Guide to the Amphibians of the Atlantic Forest: Diversity and Biology. Anolis Books Editora, 1st Edition. São Paulo, Brazil. 550p.
Hyloidea	Hylidae	Dendropsophus	Dendropsophus timbeba	n/a	21.9	10	1.6	Martins, M., and A. J. Cardoso. 1987. Novas especies de hilideos do Estado do Acre (Amphibia: Anura). Revista Brasileira de Biologia 47: 549–558.	3600	Tonini, João Filipe Riva, et al. "Allometric escape from acoustic constraints is rare for frog calls." Ecology and Evolution 10.8 (2020): 3686-3695.	No	Martins, M., and A. J. Cardoso. 1987. Novas especies de hilideos do Estado do Acre (Amphibia: Anura). Revista Brasileira de Biologia 47: 549–558.
Hyloidea	Hylidae	Dendropsophus	Dendropsophus virolinensis	n/a	23.9	n/a	1.08	KAPLAN, Moises; RUÍZ, Pedro M. Two new species of Hyla from the Andes of Central Colombia and their relationships to other small Andean Hyla. Journal of Herpetology, p. 230-244, 1997.	n/a	n/a	No	KAPLAN, Moises; RUÍZ, Pedro M. Two new species of Hyla from the Andes of Central Colombia and their relationships to other small Andean Hyla. Journal of Herpetology, p. 230-244, 1997.
Hyloidea	Hylidae	Dendropsophus	Dendropsophus vraemi	n/a	26.6	13.9	2.5	Caminer, Marcel A., et al. "Systematics of the Dendropsophus leucophyllatus species complex (Anura: Hylidae): Cryptic diversity and the description of two new species." PloS one12.3 (2017): e0171785.	n/a	n/a	n/a	n/a
Hyloidea	Hylidae	Dendropsophus	Dendropsophus yaracuyanus	n/a	29.7	15.3	1.3	MIJARES-URRUTIA, Abraham; RIVERO, Ramón A. A new treefrog from the Sierra de Aroa, northern Venezuela. Journal of Herpetology, p. 80-84, 2000.	n/a	n/a	n/a	n/a
Hyloidea	Hylidae	Dryaderces	Dryaderces pearsoni	UMMZ 57548	46	n/a	Tympanum indistinct	Gaige, H. T. 1929. Three new tree-frogs from Panama and Bolivia. Occasional Papers of the Museum of Zoology, University of Michigan 207: 1–6.	n/a	n/a	n/a	n/a
Hyloidea	Hylidae	Dryophytes	Dryophytes chrysoscelis	n/a	43.6	n/a	4.65	James, Taylor, Hunter, Ryan. 2021. Evolutionary and allometric insights into anuran auditory sensitivity and morphology. Brain, Behavior and Evolution.	2326.66	James, Taylor, Hunter, Ryan. 2021. Evolutionary and allometric insights into anuran auditory sensitivity and morphology. Brain, Behavior and Evolution.	n/a	n/a
Hyloidea	Hylidae	Dryophytes	Dryophytes cinereus	n/a	50.6	n/a	6.17	James, Taylor, Hunter, Ryan. 2021. Evolutionary and allometric insights into anuran auditory sensitivity and morphology. Brain, Behavior and Evolution.	2500	James, Taylor, Hunter, Ryan. 2021. Evolutionary and allometric insights into anuran auditory sensitivity and morphology. Brain, Behavior and Evolution.	n/a	n/a
Hyloidea	Hylidae	Dryophytes	Dryophytes versicolor	n/a	46.1	n/a	5.48	James, Taylor, Hunter, Ryan. 2021. Evolutionary and allometric insights into anuran auditory sensitivity and morphology. Brain, Behavior and Evolution.	2026	James, Taylor, Hunter, Ryan. 2021. Evolutionary and allometric insights into anuran auditory sensitivity and morphology. Brain, Behavior and Evolution.	n/a	n/a
[truncated: 1,399 more rows]
